# Supplementary material for: m6A regulator-mediated methylation modification patterns and tumor immune microenvironment in sarcoma
Source: publisher site journal article supplement (doi:10.18632/aging.203807), 2022-01-03
Supplement: Supplementary file [file aging-v14i1-203807-supplementary-material-SD1.pdf]

SUPPLEMENTARY FIGURES

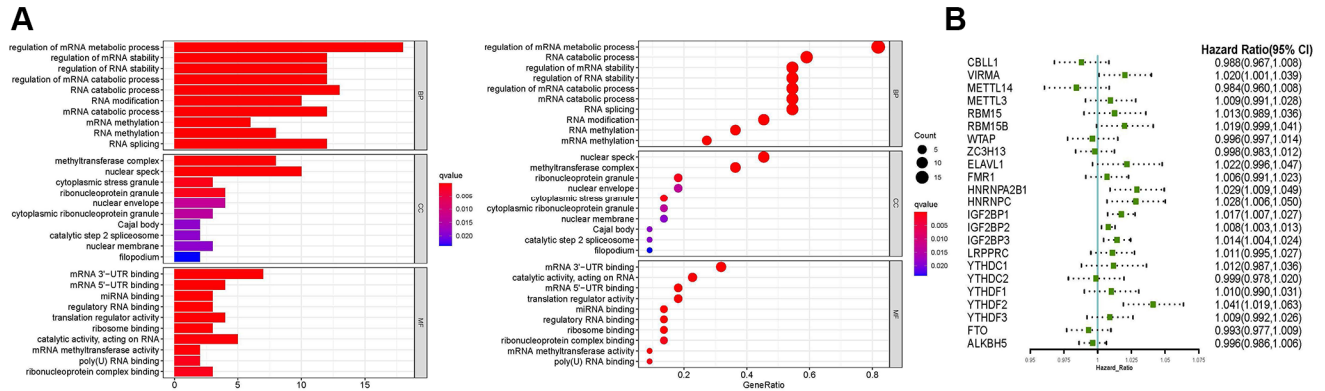

**Supplementary Figure 1. The Gene Ontology (GO) enrichment and univariate Cox regression analyses results of 23 N<sup>6</sup>-methyladenosine (m<sup>6</sup>A) regulators. (A) GO enrichment of 23 m<sup>6</sup>A regulators. (B) Univariate Cox regression analysis results of 23 m<sup>6</sup>A regulators. Expression levels of insulin-like growth factor 2 (IGF2) mRNA-binding protein (IGFBP)-2 (*P*-value = 0.002), Vir-Like m<sup>6</sup>A methyltransferase associated (VIRMA) (*P*-value = 0.039), IGFBP1 (*P*-value <0.001), heterogeneous nuclear ribonucleoprotein (HNRNP)-C (*P*-value = 0.009), HNRNPA2B1 (*P*-value = 0.004), YTH m<sup>6</sup>A RNA-binding protein 2 (YTHDF2) (*P*-value <0.001). and IGF2BP3 (*P*-value = 0.005) were protective factors for patients with sarcoma.**

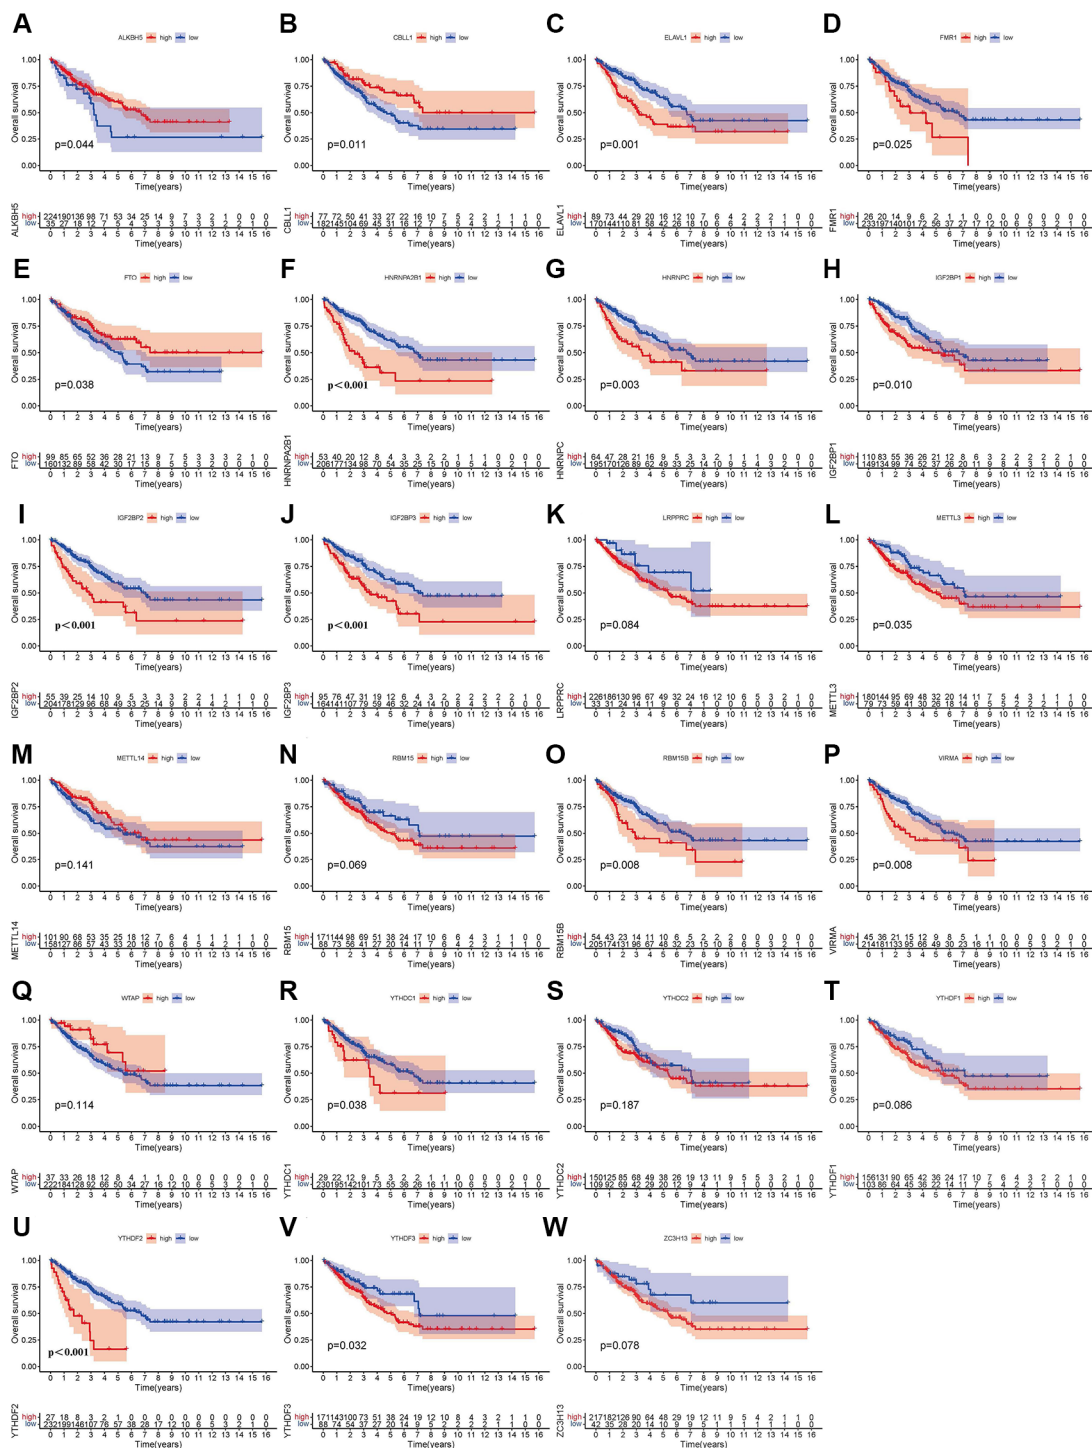

**Supplementary Figure 2. Survival curve of 26 m<sup>6</sup>A regulators.** (A) ALKB homolog 5 (ALKBH5); (B) Cbl-like 1 (CBLL1); (C) ELAV-like 1 (ELAVL1); (D) Fragile-X mental retardation 1 (FMR1); (E) Fat mass and obesity-associated (FTO); (F) HNRNPA2B1; (G) HNRNPC; (H) IGF2BP1; (I) IGF2BP2; (J) IGF2BP3; (K) leucine-rich pentatricopeptide repeat containing (LRPPRC); (L) Methyltransferase-like (METTL)-3; (M) METTL14; (N) RNA-binding motif protein 15 (RBM15); (O) RBM15B; (P) VIRMA; (Q) Wilms tumor 1 (WT1)-associated protein (WTAP); (R) YTH domain containing (YTHDC)-1; (S) YTHDC2; (T) YTHDF1; (U) YTHDF2; (V) YTHDF3; (W) Zinc finger CCCH-type containing 13 (ZC3H13).

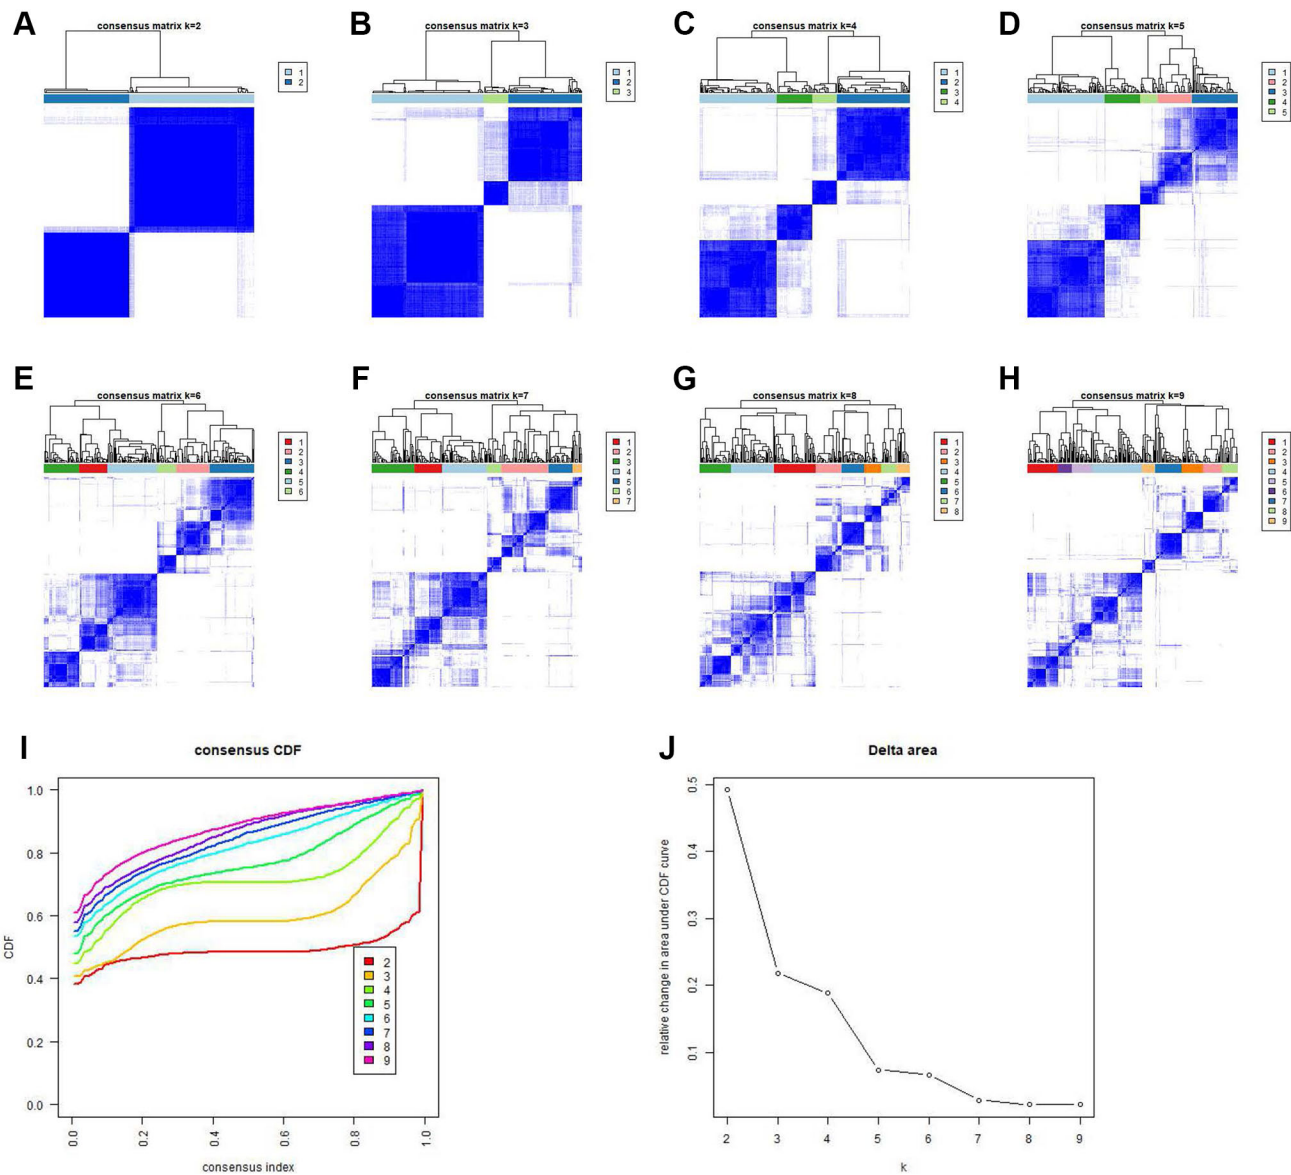

**Supplementary Figure 3. Consensus clustering analysis of m<sup>6</sup>A modification clusters. (A–H)** Consensus matrices of the patients with sarcoma for k = 2–9. **(I)** Cumulative distribution function (CDF) of consensus clustering analysis. **(J)** Relative change in area under the CDF curve of consensus clustering analysis.

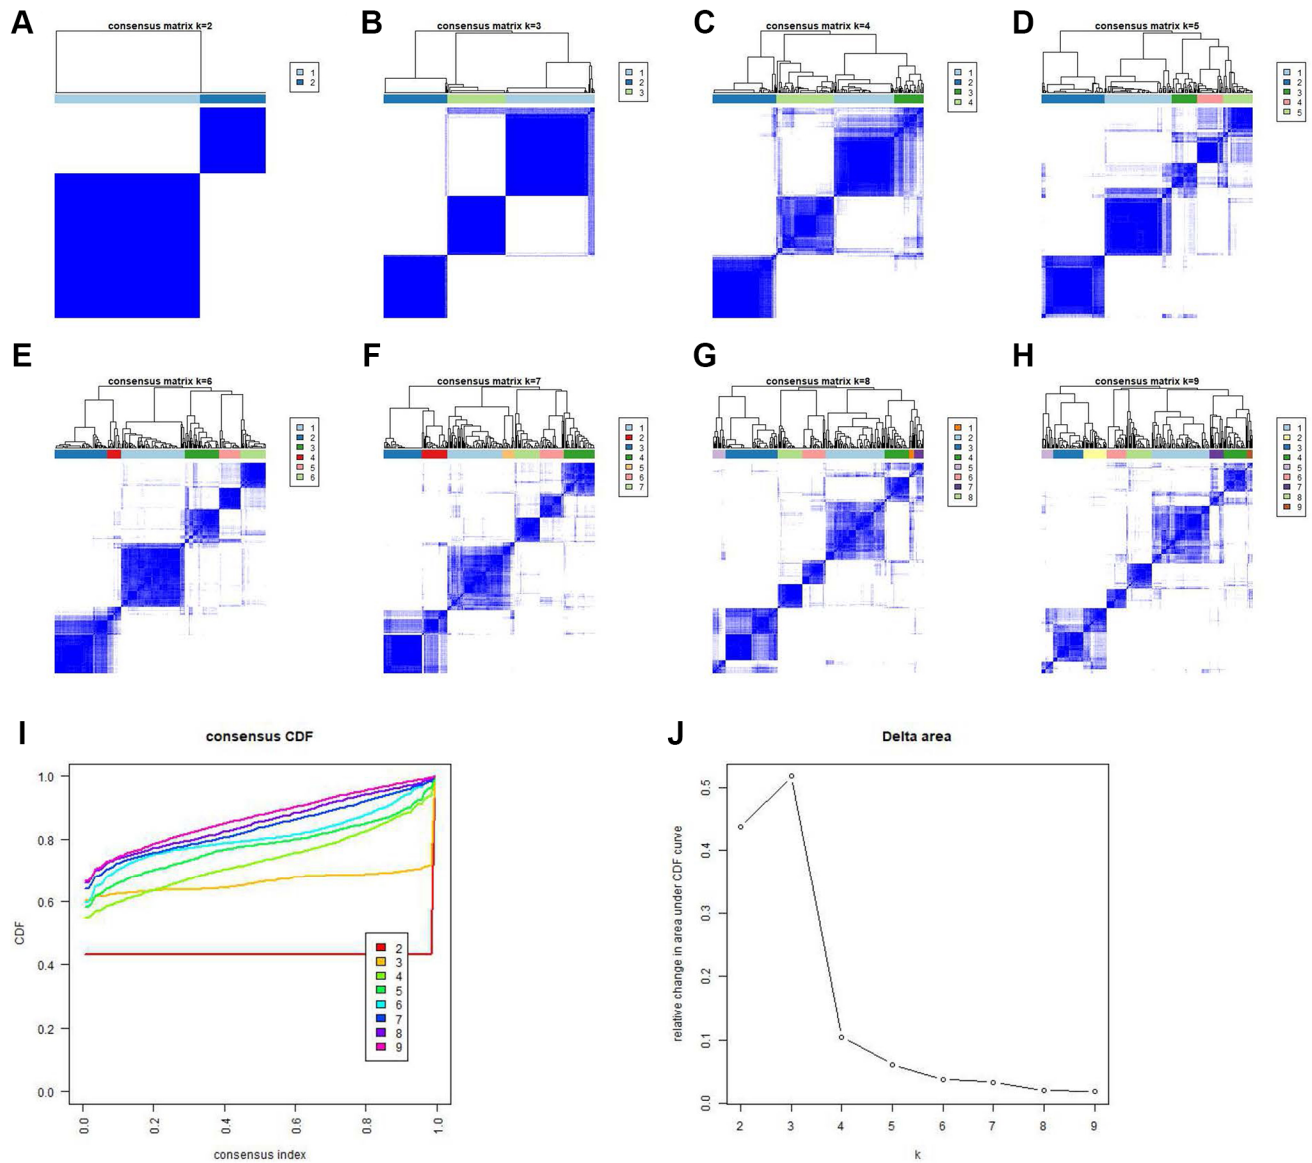

**Supplementary Figure 4. Consensus clustering analysis of m<sup>6</sup>A gene clusters. (A–H)** Consensus matrices of the patients with sarcoma for k = 2–9. **(I)** CDF of consensus clustering analysis. **(J)** Relative change in area under the CDF curve of consensus clustering analysis.

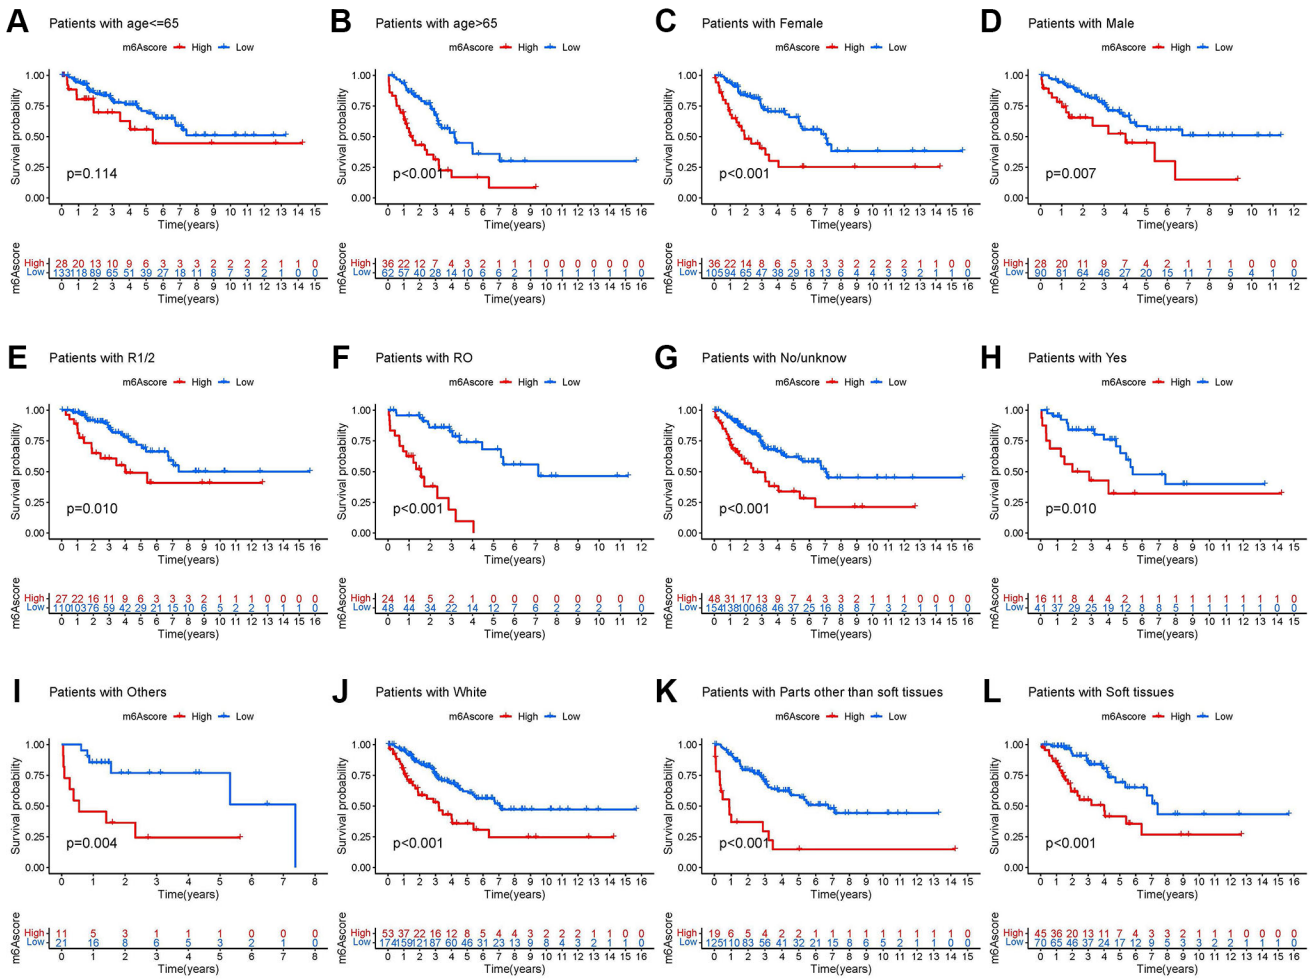

**Supplementary Figure 5. Kaplan-Meier (K-M) analysis of different clinicopathological features in high- and low-m<sup>6</sup>A score groups. (A) Age (age ≤ 65); (B) Age (age > 65); (C) Gender (Female); (D) Gender (Male); (E) Margin (R1/2); (F) Margin (RO); (G) Metastasis (No/unknown); (H) Metastasis (Yes); (I) Race (Others); (J) Race (White); (K) Site (Parts other than soft tissues); (L) Site (Soft tissues).**
