# Supplementary material for: m6A regulator-mediated methylation modification patterns and tumor immune microenvironment in sarcoma
Source: Aging (Albany NY). 2022 Jan 3;14(1):330–53. doi: 10.18632/aging.203807 (PMC8791212; doi:10.18632/aging.203807)
Supplement: Supplementary Table 4 [file aging-14-203807-s003.xlsx]

## Sheet: Sheet1
Supplementary Table 4. Differentially expressed genes (DEGs) of different m6A modification clusters.
Avs.B	IGF2BP2	MIR497HG	HMGA2	OSTC	COX7A2L	UBE2E3	C19orf57	RPSAP52	CKAP4	GOLGA2P5	LIMK1	PYCR1	CCND1	FAM184A	TMEM9B	DBNDD2	POLA1	TSPOAP1	GLT8D1	SLC35C1
	FANCE	CHPF2	RAB1A	AC107308.1	SFI1	CCP110	ELK3	BARD1	TMEM248	TM2D2	TM9SF3	CHPF	AL109918.1	P4HA1	COPZ1	KDELR1	KDELR2	MMP2	FKBP14	TCTN3
	ZNF700	ATP6V1G1	SRPRB	FKBP7	RNF149	NEURL1B	SLC38A7	HEY2	CREB3L1	C5orf15	P3H3	ZNF620	HFE	LAPTM4A	ACTG1	HDLBP	WDR76	SYNE2	MMP19	CDKN2B-AS1
	COPS7A	MFSD5	SBSPON	TRAPPC2	RAB9B	RIBC1	SIRPA	GAPLINC	SURF4	PHF19	MICAL1	DHFR	PAPSS2	SEC61A1	PSIP1	IFNGR2	SNHG16	FAM45A	FSCN1	ASB2
	SEC62	GORASP2	SERPINH1	FAM3C	TMED10	MCFD2	SAR1A	COLEC12	TRAM1	METTL1	AC022007.1	TMEM119	IGSF9B	CMTM3	TMBIM6	TAF9B	ZDHHC9	ZDHHC5	AUP1	GKAP1
	P3H4	RAB2A	AC008760.1	EP300-AS1	FAM171A1	RAB11FIP5	KHDC1	ALDH18A1	TP73	TMEM60	RBM38	SPAG5-AS1	BICDL1	FUT11	ASB16-AS1	YPEL1	LINC00578	RNF38	EMC3-AS1	DCTD
	PCOLCE	KNTC1	TSKU	TMED9	GOLM1	PDE4D	PLXNB1	TMED2	CHAF1B	HOXA1	MAP3K14	LIG1	OS9	UBTD1	CCNE2	MIR4697HG	CELSR2	SNAI2	EBPL	SESN2
	FAM57A	TXNDC16	NFATC2IP	ARHGEF39	SSR3	BZW1	NRBP1	AC010203.1	TMEM41A	TTLL7	HNRNPA1P16	RAB3D	RRBP1	FKBP10	TMEM263	PPP1R12B	HEBP1	ENG	AC022893.1	PKN3
	DCST2	EZH2	ERGIC1	PRR5	GARS	SELENOF	AL662844.4	AC092687.3	SPIN2B	SPRED1	BRIP1	HSPA5	RPL13A	HCG27	TMEM214	RTN4	TRIM45	FAM111B	FNDC4	TSPAN31
	ETV5	BRI3	RABGAP1	PDPN	RF01909	LRP1	PARP2	JPH2	TMEM208	KDELR3	ADAMTS2	METRNL	OXCT1-AS1	ZNF682	TOM1	RHBDD2	DCST1-AS1	CDK4	HSP90B1	RPL17P50
	OAF	DNAJB12	TPST2	OST4	AP1S1	ACYP1	MBNL1-AS1	EFCAB7	SNX17	RALB	LINC01116	CD63	WDR43	GPN1	TMEM115	RASL12	RPS24	AL021707.8	TUBGCP4	AL121906.2
	NEK6	PABPC1	C15orf62	CNIH1	TRIM46	TK2	RTKN	RPLP0	MYH11	AL645939.1	HLCS	PIGF	ZMYND10	AC026355.1	SLC35B1	FZD2	CCND2	C21orf58	BVES-AS1	CCDC146
	KLHL42	RIBC2	TMSB10	AL607028.1	PPIP5K1	LMOD1	SLFN13	PPIB	RAB7A	LINC02454	KCNMB1	FJX1	ANAPC13	RBBP7	AP003392.4	TMX2	CERCAM	ARHGAP33	AKAP1	FO393418.1
	BLOC1S2	INPP5J	GALNT1	SPIN4	SLC38A6	USP49	TTYH3	GLTP	APH1A	ATAD5	PLBD2	WBP1L	VIM	SRPX2	CTDNEP1	TBL2	NRBF2	WFDC2	RPS12	AC005180.2
	C17orf49	BORCS7	TXN2	SRM	CYBRD1	NCAPD3	ZNF844	RND3	TRIAP1	SEC11A	CCT6P1	IMPA2	NUP210	PCSK7	LINC01018	SH3BP4	PSMC3IP	CASZ1	RFTN2	RPS27A
	CMTM7	SMPD1	MTMR1	ALDH1L2	ATRAID	GPX8	LAMA3	AC025171.2	RASSF3	PPP1R14B	BTN2A2	AC104463.2	AL136366.1	DDX12P	PPP1R14BP3	CCT2	FANCI	APH1B	AC011498.7	FTL
	FKBP11	SDR39U1	RCN3	AL132642.1	C1orf53	AKAP5	IKBIP	PRRT2	YIPF4	CDC42EP5	AC138474.1	YPEL5	SUMO3	AL390879.1	BET1L	AC091057.1	B3GALT6	LSM11	PHETA1	RNF2
	FAM83D	AL139412.1	TP53TG5	MORN2	NIPAL4	DOCK3	ATP6V0E1	AP002495.2	C1QL1	AC005034.3	RPS11	SPRYD3	ACP1	GRIK5	INKA2	AL109955.1	RHBDL3	CNTLN	RPS2	AC005180.1
	AC025176.1	TMSB15B	CENPK	PPIAP16	PRDX5	MORN3	RPL12	CYFIP2	TSFM	DEPDC1B	TNFRSF1A	DLEU2L	C15orf41	JDP2	FBXO43	MDM2	STARD9	HMGN2P19	AC008443.4	VPS45
	CHID1	AC026355.3	PPP1R14A	ISOC2	SLMAP	DZIP1L	ERLEC1	SHMT2	DHX32	SDR42E1	GALC	AL138787.2	DCN	TSPOAP1-AS1	GHITM	SMOX	TMBIM4	AMPD2	B4GALT7	EMP1
	AC080038.1	CARMN	SUMF1	IDH1	SLC35F5	VEGFC	FMR1	SYNM	PTBP2	PDIA4	FBXL22	RPS9	AP001542.3	AF001548.1	CENPBD1P1	TREM1	AL031846.2	MAIP1	C1D	TNFRSF10B
	HIRIP3	CCR10	AC100823.1	RDM1	FANCD2	HMCN2	TMEM167B	COL13A1	SETMAR	RPL31	AEN	MIR3936	PLAG1	MYDGF	MAPK4	RIMS3	GADD45G	DHRS13	SLC25A43	PHF23
	IL37	REXO5	MARCKS	CDC42EP1	KIFC2	AC234582.1	PARD6A	AL662844.3	AC097534.2	FCMR	GPR135	AC092809.4	ARHGDIA	IRF6	HAUS5	KIF24	ALG3	SDF4	HMGB2	TJP2
	RPL3	SDCBP	AC093536.1	MAPKBP1	MPDU1	LEPROT	SYNPO2	RALA	DSN1	CCL20	ZNF589	UBL3	TBX6	CALM2	UBA52P6	AC102953.1	SERPINE2	ATAD2	GLT8D2	AL080276.2
	SERP1	AL162231.2	AL132765.2	TMEM56	AL365259.1	PLIN3	ERI2	ELL3	TSPAN3	MANBA	AF001548.3	FANCA	PPP1R9B	SNRPF	CUL9	E2F2	DOC2GP	CTDSP2	PFDN5	AJ011932.1
	IQGAP3	ZNF76	EVA1B	TACC2	KRT18P5	MFAP2	ATP6V0D1	RPL41	VTI1B	CC2D1A	HADHA	RPS7	COPG1	ILF3-DT	AC073610.1	NCBP2	MCM3	RBBP8	NRBP2	PTGES3L
	ADPGK	ZXDA	ATP6V0E2	AC011466.3	AGFG1	PAIP1P1	AL445231.1	TIMM13	CAMK1	RPL41P1	TCEAL2	RPS20	COL1A1	DIAPH2	PSAP	TMEM39A	TMEM250	FAM122C	SDHAP3	RPS17
	SARAF	AC069224.1	PNMA8C	KBTBD12	PLA2G15	E2F1	AC004637.1	TRMT10B	TMSB15A	SLC30A6	GRM2	CBX7	PPP2R2D	SAPCD1-AS1	RNA5SP78	ZNF625	CCT8P1	MYLK	CEP295	DAB2
	GOT1	BCAT1	RPL15	GABARAPL1	AC009318.2	AC083862.1	NPM3	AC116366.1	ACAT2	FAM131A	APMAP	ANPEP	EIF4E2	RAD51-AS1	AL121906.1	TIAL1	CCDC189	NIFK	TIMP2	AC005261.3
	CIPC	HOOK2	CDK6	TPT1	AC010618.1	MTMR8	DNASE1	PCBP2	CEBPB-AS1	GFPT1	LINC01273	KCNQ4	CSRP1	TCF19	MIR1-1HG-AS1	LPAR1	STRAP	SERPINE1	CNPY4	ZNF367
	ATG16L2	AC026403.1	RYR3	EZH1	ASF1B	SSBP2	PRICKLE4	METTL3	DCST1	MIR3936HG	SSU72	EIF1	CLTC	FRMPD3	MOAP1	HLA-F-AS1	TMEM167A	AP001107.5	TTPA	CNPY2
	KCNH2	SLC47A1	NPC2	UXS1	AC114956.3	ABCF2	RPS15AP38	AC005696.1	NCLN	AC022150.4	RALGPS1	TMEM179	EXT2	COL1A2	RPL35A	GNAO1	LUM	AC016571.1	MAFG-DT	RPLP2
	AC008770.3	CLSPN	AC073611.2	TXLNG	LMO1	CIAPIN1	PPP2R1A	SLC39A7	GPX1	GRIPAP1	STIL	FAM13B	POPDC2	IGFBPL1	AC131025.1	TRAF5	HELLS	L3MBTL1	TBL1XR1	EMP2
	AGAP2-AS1	GLB1	NCKAP5L	RNASE1	IER3IP1	NAGLU	SEC61B	SPARC	UGDH	MXD3	AL121832.3	CDH11	ITM2B	RMND5B	YIF1B	CCHCR1	MICAL3	MARVELD1	POU2F1	WIPI1
	DOK1	FHOD1	AC025165.3	PLXDC2	LRRCC1	PLOD3	TRIM8	STN1	AC025280.1	CNN1	KLHL23	RNU6-481P	PHB2	SLC25A25	RUSC1-AS1	UCHL1	LUNAR1	CCDC84	LINC00941	PHEX
	NCL	ZCCHC18	HMMR-AS1	ADRB2	PTX3	AC008752.2	KNL1	CYCSP10	44260	PPDPFL	FILIP1	AP000704.1	AC002563.1	ZBTB5	AC022296.2	HMGA2-AS1	AC093495.1	C11orf80	PTRHD1	SRD5A3
	KMT2A	TENT5C	RPL9	TNFAIP6	ADAL	AL355075.2	SSR1	LRRC32	SMAGP	SERPINA6	WHAMM	44264	KLHL38	ZBTB40	THY1	SNX8	ARL1	OSM	LYNX1	AL022238.3
	IPO5P1	TSPAN2	TMEM150A	AC092811.1	RNF7	PLTP	MUC1	ABCF3	ARL4C	SLC25A22	ZNF674	GABARAP	ABHD16A	MYEF2	ZNF439	PPP4R4	DNAJC12	LAMP1	LYVE1	EPM2A
	GATAD2B	AP001372.1	RPS6KL1	RHOC	L2HGDH	ACTA2-AS1	ACTG2	ZGRF1	AC104564.1	C1QTNF6	PHKG1	RPL13AP25	NACA	RIPPLY3	BRD8	P3H1	LINC01907	SCD	PABPC4	GANC
	AL592211.1	AC127496.3	CCDC9B	E2F8	PLAUR	WDR62	ASH1L-AS1	CEP85	GOLT1B	RPL13	SNRK-AS1	DAD1	LINC02660	NPAT	TNS1	PI4K2A	CPXM1	RPL23	HM13	AL162231.4
	SSR2	CCDC88C	ALG8	RCN1	RPL6	AL513365.2	RPS4X	PROSER3	AC008946.1	TMEM87B	AL353807.3	SPPL3	HSPB3	AR	RPL28	GLUD1	RBMS1	RPS3A	AC104564.3	MSH5
	MIR4506	GLMP	UNC5B	HCN3	ARVCF	GRINA	DYRK1A	PPIEL	AC096677.1	SMC1A	AC008781.1	GASK1B	LLPH	FKBP9	TSPAN4	UNC50	GNAZ	EEF1AKMT3	AC005674.2	ALG2
	RPL27A	NNT	NECTIN2	MOGS	CTDSP1	TSPO	REEP2	PTGES3P1	ZNF887P	AC046143.1	RPS19	SLC35F6	CYP27B1	LTBP2	AC016405.1	SETP20	AKR1B1	BICC1	CCT4	HUNK
	KLC4	CCDC15	OIP5	MRVI1	ZNF337-AS1	ACTR2	AP003548.1	DGKG	HOMER3	CD276	AL135785.1	ARF3	RPL7A	SCYL1	CNNM3-DT	REEP1	HACD3	AP000892.3	CHRDL2	FLNB-AS1
	THAP4	CAND2	DNHD1	HACE1	FPGT-TNNI3K	CDH24	ZNF808	RPL37A	AK9	YIF1A	ERLIN1	SLC39A6	ZSCAN16	BUD31	RAC1	SARM1	PRPS2	FNBP1	TSPAN5	KAT7
	PRUNE2	RASD2	RYR2	AF186192.1	NOB1	AL157996.1	KIFC3	SLC44A1	ASXL1	AC009533.1	FKBP1A	SMCHD1	TAX1BP3	CDC42P4	ALOX12	MFSD1	RPL39	ZNF710-AS1	IL6R	GNB2
	SLC25A39	TPI1	CYB5RL	KANK1	SGCA	AC008676.1	C11orf24	CD248	FEZ2	DNAJB11	OAZ1	RPL27	CTSB	MNS1	AL627171.1	RPL19	NIPA1	KIAA1958	LYPLA2	SYT11
	FAM118A	HYAL2	RRAGB	P4HB	FAM53C	PKD1P6	DDX41	CCDC120	FNDC9	AC019205.1	ZNF852	USP27X	DONSON	DAND5	SMTN	KHDC4	RPL5	C15orf61	PIFO	AC109587.1
	ECHDC2	RER1	RNF112	RPL4	FOSL1	DOCK9-DT	AC098934.1	RGS9	VWA7	TP53INP2	STARD3	HERPUD1	PARL	RPL34	RPL22	XK	COL5A1	PLA2G4C	AC147067.1	ATP6V1F
	VAMP1	NEIL3	NAV3	NXPE3	ULK2	MEN1	AC027306.1	U91328.1	FAM201A	SVIL2P	CEP57L1	AL021407.3	ADHFE1	VPS26A	PHYHD1	CMTM6	NRTN	NUSAP1	MRPL17	RPL24
	CYS1	ATP6V0E2-AS1	MCM2	PCBD2	C5orf56	TESK2	POU5F1	COPS9	AC012074.1	ATP2B1	RPL29	AP000553.2	CYB561	PSMB5	AL022328.1	PSEN1	APRT	RIN1	WNT5B	RNF170
	AC099522.2	ARF1	NDFIP1	IQCC	AC104986.2	IL17B	SLC35E3	C8orf88	FURIN	OFD1	CHAF1A	ADAMTS12	LINC01094	LPP	SF3B6	RPS2P5	SNU13	AC009093.7	GALNT10	LINC02051
	RPL35	ZNF763	AP000911.1	IFFO2	AC124944.2	LAMTOR4	FSTL1	DMC1	FAM98A	MCIDAS	PLXNA4	CREB3L4	PTGES3L-AARSD1	SLC25A3	SMIM7	EIPR1	SCAI	SLC17A5	CDKN2C	GABRQ
	TRIQK	SORBS1	AC026691.1	ZNF433	AC006435.2	ITGB1BP2	TMED3	CASP16P	AC139256.2	MBOAT1	ASRGL1	COX16	FSD1	TARBP2	MXD4	GGCX	MXRA8	RPLP0P2	AP2A2	MYO19
	CEP250	CNEP1R1	RPL11	CFH	ERP44	AC136604.2	CLCN3	FAM227B	TRPC4AP	ARL6IP5	LRRC66	PPP1R14C	IRF9	DNAJB5	SETBP1	AL358781.2	ALDH3A2	ATRIP	CENPU	LOX
	TM9SF2	FRS2	EEF1A1	PRRG4	AKT1S1	ZSCAN5A	EFEMP2	DGUOK	SATL1	CALR	HYLS1	RNU4ATAC18P	ARPC3	AL513217.1	AL358472.2	AC007495.1	RGP1	RPS8	NDUFAF8	CSNK2A2
	AL450332.1	JTB	AC084125.4	ANKRA2	TMEM203	AC025171.3	AL606760.2	POLR2L	AC009121.1	SPEG	ATPAF1	PWWP2B	AL139420.2	MISP3	AP005264.7	ZNF674-AS1	LINC00114	RPL7	PNO1	RPN2
	MYOCD	NT5M	ABHD18	SMC4	CEP97	AC099811.1	PGM5-AS1	AC008115.3	FHL1	AC116917.1	RPS18	MRPS16	SLC29A3	STEAP1	TOP2A	AL021391.1	ANKRD20A4	ZNF441	MCM8	LAMTOR1
	RFC4	ZNF337	LINC01123	LEAP2	HSD17B1P1	KLHL10	SASS6	LRRC59	RXYLT1	AC016205.1	PDIA3	CCDC85B	DNAJC25	TMOD1	ABCB10	PARP16	DDOST	EPB41L4A-DT	SUV39H1	AC073910.1
	HNRNPA1	AL450263.1	RPL30	OSTF1	CCDC86	ZNF558	Z84492.1	SOWAHC	RPN1	CCT7	DIAPH3	MMP14	AC008770.2	CENPI	AC131159.1	SLC25A40	TSHB	AC133552.5	ZFP3	NDE1
	PHLDA1	AC104634.1	C5AR2	MPP7	BX284668.2	INKA2-AS1	PIDD1	CTSD	WASF3	AC016747.1	HSD17B6	POLD3	CX3CL1	SIN3A	FEN1	ANXA11	ZCCHC2	TMEM179B	CEBPZOS	SLC35B4
	AC090498.1	MTMR12	AL359885.1	METTL17	TAGLN	AF186192.2	AC084880.1	COASY	SERTAD2	TRPV4	NPAS4	DCBLD1	RNF216-IT1	UBE2T	ACP2	PARVB	LAMA2	AC099681.2	FASTK	TJAP1
	MMP17	DIDO1	TPPP	PTDSS1	C9orf3	AL359513.1	PDGFRA	LRRC37A4P	AMFR	CFL2	GABARAPL2	CCNE1	NEU1	AC102945.2	FAM89A	PM20D2	UGP2	AMY2B	ACVR1B	IL1R1
	POLQ	GNPTG	EPB41L4A	AL096870.2	NME1	SAPCD1	CCDC144NL-AS1	AL355916.2	MIR548AA1	ARF4	YKT6	WEE1	LINC00242	ZNF860	PTGES	WDR90	STMP1	PPOX	SPATA18	ALG5
	PLIN4	ARPC1A	ERGIC2	C9orf147	TEAD3	CCDC81	BAK1P1	EIF3D	CASP8AP2	SPC24	AC106037.1	OSGEP	NOP9	AC013553.3	TNFRSF10D	TMEM104	CNRIP1	CYP4F25P	FBXO5	RPA4
	HMGA1	AC004982.2	SRSF9	AC007611.1	CTSL	FGF22	SLC25A5-AS1	FKBP4	HSPD1	ASB16	AP003392.2	DHCR24-DT	MAST4-AS1	ZDHHC24	AC090515.2	TYMSOS	OGG1	EVA1A	HMCES	KANK2
	NDUFB4P11	CYB561D2	RPS13	PTPN3	CLMP	TBC1D8	AC007563.3	ZNF436-AS1	C8orf86	UBE2CP2	DTNA	NECAB3	ACBD4	CFL1P5	AC092068.2	CDK8P2	AC018766.1	STEAP3	MAP2K3	ARHGAP11A
	COLCA2	ALOX5AP	AL356317.1	ZDHHC23	LINC02001	ZNF774	LIN9	EIF3EP1	ANXA5	MSH5-SAPCD1	LRRC15	HSBP1	AL451074.1	TTBK2	RBM24	TSPAN6	ZNF697	FMR1-IT1	AC145207.8	ZMAT3
	MRPL44	AC004383.1	DMD	PCGF1	AC026412.1	DDX46	MAP3K9	ZDHHC16	CDK5RAP2	SUFU	MPP2	ACVR2B-AS1	TMEM37	MELK	RPS3	PGM5	NCAPG	GPR1	KLHL13	RPL18A
	BVES	WDR31	ZNF442	PMEPA1	PLEKHG3	CNOT2	INSIG1	AC016773.1	SZT2	CERK	TPST1	DDX11-AS1	KIAA0753	AL021707.3	OXCT1	SUGP2	RNF19A	BAX	DDX1	AL592164.1
	PCOLCE2	ALG14	C11orf68	AC004707.1	CLIP4	TPD52L1	AL591806.3	HADHAP1	HOXB6	SNX18P9	GNS	AP003108.3	STX8P1	FTH1	CNIH3	ZNF658	AC092645.1	PGPEP1	EIF5A	UBAC2
	DHFRP1	PTTG1IP	RPS6	ISOC1	IFT81	AP002807.1	GALK1	SLC25A29	AL355312.1	AC027627.1	KIF15	CFL1	CCDC51	TBKBP1	FCGBP	BUB1B	UBE2F	CDC7	AC053503.4	AC106782.6
	GBA2	ARPC1B	SMIM30	GNB1	RAD54L	RAB31	PODNL1	HAUS8	NOP10	GBP2	HTRA1	AL359397.1	NHS	ZNF48	RNH1	AC025165.5	MORF4L1	DTL	AC096536.2	KYAT1
	TIFA	MND1	AL135910.1	NDUFB5	AC092295.2	PRPF19	TRIM26	H2AFZP3	LHX2	AC055874.1	FAM149B1	ADCY9	UBE2D3	KRT10	AC106028.3	GLRX3	ZNF219	THADA	ERP29	AP001453.2
	DAGLA	LINC01278	TCEAL1	MIR3164	ATP5F1B	DPP4	KALRN	PDLIM2	TPM3	AGO4	SAMD10	SLC35G1	WDR88	DYNC2LI1	CDKL1	YIPF3	RBBP4P2	IL1RL1	HEATR3	AC024560.2
	AC015849.5	DTD1	GLG1	TSPYL2	KDM6A	BTN2A3P	AKAP6	LINC01503	SMYD4	SCAPER	PCAT6	MAP1LC3B	LINC00519	COL4A2-AS2	NIP7	ATRN	UROS	AC018643.1	TMSB15B-AS1	AL161785.1
	SLC2A9	RYBP	GTF2H4	GMPPA	AC098934.2	NNT-AS1	SORT1	TPRG1L	NSD2	LDAH	QSOX1	MAP3K7CL	AC007787.2	DPY19L2P2	HAND2-AS1	BCO1	MFSD14C	MAOB	IMP3	AC036108.3
	CR769776.2	RPS10P7	NAV2	C12orf49	FMO5	RPL13AP20	LSMEM1	LINC01354	MEF2C-AS1	AC092375.1	ANKRD18A	GXYLT2	USP28	AC034102.6	GSTO1	SCAMP2	NXPH3	C12orf77	AC021106.3	PAXBP1-AS1
	AGPAT2	OGFOD3	RNU6-583P	NFASC	AL022313.2	SNORD91B	AC079922.2	RPRML	AC092119.3	CDK2	NINJ2	RPS6KA5	XPNPEP1	AC234783.1	TENT4A	CD59	AL451085.2	ANO8	VASN	GBGT1
	CROCCP3	SH3BGRL3	AC010754.1	AC104564.2	TMEM74	SREK1	DEPDC5	AC105935.1	HSD17B12	SGSM1	COL5A2	NDC80	SEPT7P9	AC073869.1	CRTAP	KIF23	MACF1	FAM20C	MEG3	CDC25C
	CASP12	AP005061.1	AC022893.3	UTP18	N4BP2L1	AL645939.4	KBTBD11	PSRC1	OR7E7P	CCNI2	ADGRG3	HDAC11-AS1	NECAP2	ZNF37CP	ALDH1B1	SLC25A6	CCDC153	EPB41	FAM120C	CDC6
	SMIM25	SFMBT1	ATP1A1	GLA	AL353743.1	GPX7	NFYC-AS1	FRY	EPN1	PPP3R1	FAM111A	RPS5	AC106820.5	HR	BABAM2	MPZL1	ACSL1	PATJ	CIART	PTOV1-AS2
	HMGN2P4	PAK3	LINC00888	USP2	TFG	CNTRL	AP000915.1	ICE1	CRTC3	ENPP7P1	MAPK13	GPS2	RHOG	C5	KCNK2	ANTXR1	MDFIC	SRGAP1	KCNQ1	CCDC6
	LINC01775	CANT1	RPL13AP5	BAIAP2-DT	AP000688.1	SRF	BZW2	LINC00106	ATG101	FCGRT	TMEM41B	SDHAF2	MYO1B	RPE65	S100A12	NUTF2	TDRD7	RBPJ	CBFA2T2	APPL2
	RAMP1	TSSK4	AC073610.3	STBD1	FAM185BP	CD14	TMEM270	AOC4P	PRR26	TMEM45A	ZNF519	ALPK3	AC097534.1	C11orf95	DMPK	PTCHD1	RPL23P2	AP000943.3	AF233439.1	PSMD13
	AC009065.8	AC022467.1	CDC20P1	NFRKB	MXRA5	PXDC1	ACTA2	INTS3	MIS18A-AS1	FAXDC2	C5orf66	ITGB5	PARD6B	AC012085.2	MAN1B1	FAM218A	ITPR1	SLC51B	TAPT1	LTBR
	AC008438.1	AC008543.1	RPL10A	OGFOD1	PLN	KIF14	RAB22A	YWHAG	SPOP	RFX5	AL109615.3	CREBZF	MRNIP	RAB3IL1	UBR1	CHCHD1	RRAS2	RNF130	IPO9-AS1	SEMA7A
	PRDX3P1	ATP5MF	TBC1D25	PGD	ESPL1	NUDT9	FBXO9	AC004148.2	ZNF736	ATXN10	YARS2	TMEM108	ZNF879	AC008115.2	AC008443.6	ZNF181	DCLK2	NCAPG2	AL365203.2	PRODH
	AC083841.1	HGH1	PAX6	CEP72	INPP5B	AC004816.1	CHMP6	TWIST2	TOMM7	CLIC4P3	TIMM23	AC090844.2	KLF16	GDI2	GTF2E2	FAM85B	ZNF787	MYL12B	GDPGP1	YIPF5
	AC080112.1	AC002350.1	DACT3	DLSTP1	ATP13A1	COPZ2	NPIPB5	NBAS	AC096564.1	AC006539.2	ADAMTS9-AS2	AC026401.3	SENP8	UFM1	IL13RA1	NECAB1	DDIT4L	FTH1P7	GANAB	HMGN3-AS1
	TADA2A	ZNF572	BAMBI	TMEM184B	AC009509.4	RPS28	HMGN2P40	SLC23A1	DKK1	ARHGEF26	TMEM161B	BNIP3	TOMM22	TMEM216	NTRK2	GCNT1	SGO1	SH3GL2	AC022150.2	SIX4
	SUZ12P1	MYBL1	SERPINF1	IFITM4P	AL357054.4	SUGT1P4-STRA6LP	ZNF518B	RARS	GNAI2	AC010615.2	ZNF333	SLC39A11	CENPH	RPL23AP64	SOGA1	CRELD2	BCCIP	HNRNPCP7	FBXO32	PPIF
	SH3GL1	UBR7	CASQ2	STK25	VPS4A	SEC13	KHK	RPL3P4	AC110285.2	HTR7P1	THAP10	BRCA1	CLEC4G	SOAT1	TTK	SLC1A5	TXNRD3	ZC2HC1C	SYCP2	ZFP57
	RNU1-36P	RRM1	C12orf54	AC093895.1	DCAF4	KANTR	TRMT112	CRIP3	AC107871.2	CLIC1	GCHFR	SFN	LMNB1	DMAC2L	CNKSR2	YEATS4	RPL18	PRC1	IDUA	SERINC2
	ZNF93	ACTR1A	SCHIP1	SLC4A1AP	STOX1	RPAIN	NORAD	CDT1	CHCHD2	LINC00653	BCAR1	AC020913.3	RPL32	PHF7	NPTN-IT1	FCGR2A	SLC30A7	TRAJ18	PTHLH	PIR
	SUMO1	DLG3	AC087289.6	AGTRAP	GPRASP1	XYLT2	MANF	GFPT2	AL590617.2	RPS24P8	VPS25	HAND2	IL36G	FUCA2	AL138831.3	AC022107.1	ARHGEF37	AL050341.2	ATXN7L3B	AC009054.2
	AC116447.1	PLOD1	RPS15	RPL41P5	RELL1	CNTNAP3B	AC002429.2	SKAP2	TMEM25	AC099811.5	AC018521.6	ZXDC	AL928711.1	RECQL4	SEMA3A	PROCA1	SIGLEC9	DMTN	EEF1B2	LMBRD2
	ACOT2	ARFGAP1	TMEM50A	PROSER2	TFEB	AC022211.2	ZNF630	RAB5C	SRR	DEPDC1	RUNX2	BMI1	TCEANC2	AC004877.1	RPL36	SRPX	TTF2	SLF1	RASGRF2	CHPT1
	AC012615.1	HAGH	PPP1R2P1	AP003072.2	PRKN	RN7SL263P	AL390066.1	DNMT1	OR5K2	KRBOX4	RIIAD1	TRIP6	DEK	AP003392.1	RAB10	AC073529.1	ACAD8	AC009118.3	POR	RPL21
	PABPC1L	NEXMIF	CFAP20	RFC3	LARGE1	RBMS2	CEP70	TRAM1L1	ENTPD7	AC107959.1	USP37	PAFAH1B2	ESCO2	ZNF561	SRP72	SPAST	AC005618.1	SEC61G	SLC38A1	HNRNPK
	EIF4G1	DDO	LTB4R2	ZSWIM9	GPR21	AL590705.1	ARID3A	ABRACL	NRXN3	COPS8	EPHX2	FIBP	HOXD8	TRANK1	SH3GL1P1	EPPK1	AC004943.2	LINC01765	AC023968.2	ZNF44
	ASPM	MME	ZNF266	AC145098.2	DOK5	C3orf70	AL645949.1	AL138767.3	MST1P2	UPK3A	HMGB1P1	AP004609.1	TMEM132A	AC020594.1	ZNF90	AL353708.3	VAC14	DCTN2	ORMDL2	AC104794.4
	POLR2G	AC011444.1	GBP1	PTDSS2	AL592504.1	COL4A2-AS1	COMMD9	VPS13A	MRPL43	LINC00844	ADD3	RRP9	RPL38	NBPF26	CORO6	FGF13-AS1	KTN1-AS1	FLOT2	AL136097.1	E2F4
	CERS3-AS1	IGBP1-AS1	JHY	AC087289.3	ZFAS1	PPP1R3E	AC009102.1	AC016027.2	RNA5SP490	TALDO1	AP006621.2	CTSA	ZNF581	FAM27C	MYORG	CKMT2	IMPDH1	GALNS	PNISR	SOCS3
	NICN1	IDH3A	AC015849.3	FAM234B	LFNG	XPOT	ZNF407	RF01518	TMIE	SLC35B3	TRIM9	RNF6	COMT	OSBPL10	RACK1	AL590867.2	IL24	ATP5MD	AC090912.1	AC009268.2
	BHLHA15	LONRF2	APBB1	SHMT1	PTP4A2P1	ARL17A	TFPI	WDR12	FERMT2	S100A8	RBPMS	PPP1R12A	AC027237.3	TMEM80	DHX35	PRC1-AS1	EXOC6	CCDC14	RPL35AP26	AL161756.1
	ALDH4A1	ATP6V1G2	DCAF12L2	NLRC5	MTMR11	SRMP1	BLOC1S4	BRAFP1	RNU6-1238P	AC022706.1	HSPB8	SLC2A3	RN7SKP70	AC133552.2	ITGA7	ANXA7	NDUFC2	AC009967.1	OTUB1	AC109460.2
	LLGL2	NBL1	REP15	HMGN5	SERF2	AL121753.1	REC8	H1FX-AS1	LINC02279	SPIN3	P2RX4	FNDC3B	WWC2	TCF4	MTO1	KLF8	ETV1	PPP1R12A-AS1	PDE3A	LRRC57
	ADO	CMTM8	PAQR7	TTLL12	ZNF554	GDF9	ZNF619	RDH11	AC115284.2	STAT5B	AC109460.3	GINS1	ANO4	FAXC	LINC02611	AC012676.5	KLHDC9	JAGN1	GJA1	TGFBR1
	AC092818.1	VSIG4	LY6G5B	PHLDB2	LINC00623	TAB3	AC135507.1	STK17B	AC232271.1	KAT2B	DTX1	SPAG8	S100A9	PRDM15	TMEM258	SND1	DMXL1	AC018647.1	ARHGAP18	SLC39A13
	AC239600.1	AC078909.2	SLC39A9	SEPT2	TBC1D3B	ATP1A1-AS1	ITGA8	LRRC14	ZNF503-AS1	ZNF248	AF165147.1	ATXN7L3	TMBIM1	PHC3	DDX39B	BMP1	KCTD14	PCYT1B	AJM1	AC025627.1
	NR1I3	TMEM33	DNAJC10	PHF8	ATG4D	CCDC85C	SEPT3	CAMK2N1	GSTM4	ROCK1	FAM241B	VSIG10	GRSF1	AP003119.3	DPCD	PTCHD3P2	AC009126.1	AC107464.3	PRDM4	HSP90AB1
	BDH2	CCN1	WDR45B	PLEKHG2	AC022634.2	CBR3	SEPT7P2	SLC2A10	SLFNL1-AS1	SERPINA10	AP001187.1	AC005523.1	PAQR8	CAP2	KCNMB4	ATP5MPL	SELENOH	WDR49	SSR4	SVIL
	CD302	HNRNPC	RPL8	AP2S1	SPCS2	SUN2	GHDC	WDR46	AC004223.2	AC000068.1	DERA	TOR1A	AC104532.2	VENTX	AL354893.1	KPNA3	AL049838.1	HADH	PPA1	MIR3677
	ATP23	CENPP	Z97832.2	SGSM2	RPL7P3	LCORL	FAP	MEMO1	RTP1	POLE2	CEP152	LGALS9C	ZBTB26	C1orf74	LYPLA1	TSGA10	RTEL1-TNFRSF6B	HIPK4	PTBP1	STRBP
	C10orf88	AP002956.1	AL355488.1	SNORD113-4	KNSTRN	NADK2-AS1	HSPB7	AC019069.1	REEP6	RPS16	RETREG2	AC113410.1	STARD6	AC120114.1	CENPF	AC141002.1	RBX1	MARCO	RPS26	CDCA7L
	S100A11	AC079848.1	TIMM8AP1	PAPPA	TPBGL	ARHGAP44	LACTB	RHOQP1	C12orf10	AC011498.3	AL136528.2	B4GALT2	SPANXA2-OT1	H3F3B	TTLL3	AC009533.2	ORMDL3	HLA-DOB	AC005920.3	HSPA2
	AC015909.2	ST13	LPIN3	GARNL3	PGPEP1L	AC105339.3	NCKIPSD	AC104984.3	SPR	FANCL	GLTPD2	ADAM22	TTC7A	YIPF1	ITPR1-DT	RN7SL812P	SLC11A1	ZNF503	SCML1	ZNF233
	AL096701.3	FAU	AKR1C2	AL445470.1	PRR13	CUEDC2	CPLANE1	DOP1A	ARHGAP24	ERGIC3	DUSP1	RGS19	C8orf58	MYOM1	EI24	AL451050.2	AL122010.1	C5orf52	TREML3P	AC239859.6
	AC016708.1	AL031775.2	ACOT4	CLU	PER3	EFCAB5	AC013553.4	RNA5SP39	CTPS1	AC041040.1	MOCS1	EXT1	RPSA	MFSD6	FXN	AC007114.2	SMIM20	IKBKB	ARL6IP1P2	CSGALNACT2
	RRS1	SGPP1	USP1	STAB1	AL162377.1	INE1	HINFP	MYLIP	TMEM19	LYRM4	AC138393.1	FSTL3	BX470209.2	STMND1	EXOSC1	PRR19	EIF3I	C4orf48	VEPH1	NALT1
	TENT5B	AL445220.1	PI4KA	CCDC163	TXNDC9	PHKA1P1	HASPIN	EIF3B	YES1	XIAPP3	GBP1P1	AL390726.5	AC244154.1	AL450998.2	CCNO	AP002008.3	TP53RK	JMJD7-PLA2G4B	WWC2-AS2	ACTBP1
	FNDC3A	AL357079.1	TTLL7-IT1	DHDH	SUPT20HL2	CINP	ISCA2	AC003665.1	TCEAL8	TSSK3	SHPK	USP21	FRMD6-AS2	MIR9-3HG	EML6	HAUS2	MAOA	TCEA1P4	NOP2	TBXAS1
	HERC2	AKR1C1	EXOSC6	NEIL2	TNFRSF12A	QSOX2	GCKR	AC091152.4	AL450306.1	EXPH5	LINC02102	NDFIP2	NANS	CIDEB	PTGES3	IL18BP	CDK2AP1	SUZ12	AC008735.4	ATF4
	RFX3-AS1	VKORC1	IRF2BP2	FPR2	CDCA7	VAX2	CHMP2A	CENPW	RBM15	SLC1A3	ZBTB20	GPR85	AC010306.1	ARPC2	GON4L	AC141586.4	SRP72P2	AC010491.1	LHFPL1	TIGD3
	DOLK	AC018809.1	AC090616.6	TBCC	SMC2-AS1	PHKA1	ILK	LRRC8D	CALU	ZNF274	CCSAP	AC084064.1	BBIP1P1	PDGFRL	AC003957.1	TM9SF4	EXO1	HCP5	AC018832.1	WDR86
	AMOT	ARTN	AC103739.2	AC016596.2	CLEC11A	COQ7	AC082651.4	CTH	AC073548.1	GDPD2	CCDC183-AS1	LINC01160	TPRA1	OR7E102P	AL449423.1	HK2	KIF18B	ST5	AP000911.2	AC005274.1
	JADE3	MIR3117	AMT	CRBN	G6PC3	AL160175.1	PTPN12	STX1A	MLLT6	KIAA1614	PCNT	AC007114.1	TTC33	ALG1L13P	RDH5	ZNF788P	NDUFA10	NSMCE4A	PYM1	BTBD1
	ULK3	GRB2	BRMS1	MYC	ACLY	ZNF184	OTUD7B	RPS27AP16	CHKB-CPT1B	LAMTOR3	AC079793.1	RN7SKP52	PPP5C	RBM14-RBM4	ZNF33A	AHCYP2	ZC3H12C	RPS23	FPR1	SLC47A1P2
	DBF4B	TMEM147	ZNF527	SRRM1	ZNF641	CHD1	ZNF182	AL133338.1	AC092112.1	ZFX	MIR6819	DACT3-AS1	AC024267.3	AC134682.1	AL157904.1	PELI2	RAB14	LINC01489	UBR4	TMPO-AS1
	AC135983.2	IDH2-DT	TIMELESS	Z98884.1	MAP4K4	FAM32A	CDH1	COX6CP2	FAM120A	AC007749.1	AL160412.1	RTTN	AL353705.2	TACR2	PCM1	AL135936.1	AC007036.1	MELTF-AS1	CAPNS1	NUCB1
	PAXBP1	NUP62CL	PLK4	CCDC71L	COL10A1	ARL2	LONRF1	LINC00672	FRY-AS1	AL391069.3	LMAN2	EVI2A	AC007663.4	AL031186.1	CD55	TNIP2	SPDYE18	AC060780.1	DIXDC1	LINC02052
	AL359265.3	RPS25	PCP4	AL592293.2	AP003392.6	MIR29B2CHG	DHRS7	RPL10	RETN	AC092070.2	SLC31A1P1	SCML2	AC097662.1	LTB4R	AP001574.1	AL512303.1	AF129075.2	AC106801.1	ZNF594	HEXA
	AC125494.2	LINC01973	NUMA1	HSPA4L	MPHOSPH10	MPG	FABP5	NPM1P25	RN7SKP241	BET1	UACA	PHBP12	PRKAA2	SLC27A1	AVIL	ZBTB20-AS1	ZSCAN30	AC011472.1	SNORD3B-1	KIAA0586
	IL20	TUBGCP5	AC011461.1	NDUFAF4P3	AC008691.1	AL021407.1	ZNHIT1	AOC3	AL662907.2	ATP6AP1	HPCA	TOE1	RPL22L1	FAM205A	HLA-U	ATP2A1-AS1	CBX1P1	CACTIN-AS1	AC009652.1	AP003059.2
	RPL23AP66	TUBA4A	ATXN3	EEF2	RNASE2	SEMA4F	AC233723.2	RF00265	ASNSD1	MCM5	ID1	AC097460.2	AC092943.1	PLBD1	SUMO2	TXNDC12	TMCO1-AS1	AC017104.1	AC096745.1	UBA52
	AC025171.4	AC003102.1	AC008610.1	PAXIP1-AS1	BEX5	PRKAR2A-AS1	SPAG5	AC099681.3	AC090229.1	PPRC1	LRRC37A9P	MAATS1	AC068025.1	AL359317.1	MRPS34	AL592494.2	ZBTB16	SPEN	TBC1D22A	AL009174.1
	MTCP1	GJB2	ZFYVE19	BTG3-AS1	SH2D3A	AC116407.2	TPD52	AC231657.1	ALX1	AC092919.2	RMI2	RTCA	AL451105.1	AC138649.1	WDR6	SUPT16HP1	PRMT1	MGARP	NCOA7	SOCS7
	RPAP1	AL080243.2	SMYD5	PSMD1	RHOA	CYGB	TOPBP1	ABHD10	CEMIP	TFR2	RPL36AL	PPP4R2	SYCE2	AC010136.1	ELFN1	C5orf34	CATSPER1	LNPEP	MRPL20	FAAP100
	ACOT1	SMO	SMIM15	STX17	PEBP1	AC109449.1	AC016065.1	RPL9P9	AC233728.1	MMD	AC018644.1	PTPRF	LINC01920	LCA5	APBB3	AP001347.1	MRPS2	AC021785.1	AC022034.1	MYL3
	ZNF235	SPSB3	AC020688.1	FBXO36	STX5	CGNL1	SERINC5	UBE2Q1	AP005264.1	AC108215.1	FZD1	AP000866.2	TCEAL9	COX4I1	UBE2Q1-AS1	MRTO4	AC009121.2	GSDMA	ZDHHC8	CCNJ
	SNORD70	KIFC1	AC013643.3	ZKSCAN7-AS1	THSD4	SEPSECS	AP3B2	SLC38A10	STK24-AS1	PTBP3	HERC1	TASP1	CKMT2-AS1	NUDT16	KMT5B	KCMF1	ZNF347	PDGFA	AC073349.1	PRSS27
	ZNF362	AC023355.1	MRC1	GCSAM	PIGH	AC020904.1	AC125611.4	AL355574.1	DYNLL1	FIGNL1	LINC00605	GCNT4	SRRM3	WFDC1	ZNF451-AS1	FAM178B	ARID4A	RAP1B	AP001767.3	DHRS11
	SNED1	LTN1	RN7SL69P	ANXA1	RFFL	BUB1	BX005019.1	SKIL	SPCS1	S1PR3	KLF17	GPR39	FAM3C2	PPM1L	DCAF13P1	EHD3	ZDHHC7	AC018738.1	TEX261	AC087521.1
	PIGZ	ARMCX4	ZNF22	AL161668.3	CBL	MAP3K4	GALNT17	PYGO2	PDE5A	ZNF557	RTCA-AS1	RALGAPA1	RAD50	THBS2	AC139530.2	TRIM66	AC012651.1	UBXN6	MIER2	FAM43B
	AC103739.1	AC022079.1	AC096537.1	PHBP20	RPS14	POLR3H	ARGLU1	BID	GRIN2D	C2-AS1	RPL7P9	LRRK2	CACNB2	HOXA-AS2	AC008982.2	RN7SL333P	AC093909.1	TSNARE1	KIF4A	AC027601.1
	EVA1C	PDCD6IPP2	LINC00640	EIF3J-DT	EIF5	CFI	ANO7	AP005131.6	ZNF397	TAP1	AC079922.1	AGAP2	PLAU	AC139453.2	TDRD3	RPL26	DDX21	MAN2A2	CCL26	TNFRSF19
	ACKR3	EFNA4	ATF1	USP5	AC084125.2	LINC00702	CHEK1	RAD51	SHQ1	RAPGEF6	ZNF112	PWP1	DNAJA3	HPD	CNR1	DERL2	PRPF3	HMSD	GAS5	USP3-AS1
	AC131281.1	STRA6LP	TMEM219	GOLGA8H	AC012146.3	NIT1	ZNF778	SNHG8	TBL1X	CDKN2B	MTAP	PRKRA-AS1	FAM89B	CD81	DDX11L2	SKA1	AC026740.1	MORN5	BOLA3	KARS
	ENPP7P10	GACAT2	AL139220.1	PIM2	POLI	CRYBB1	AC108134.2	SNORD63B	AC098614.3	ERI3-IT1	ARL3	AC021594.1	QDPR	AC015917.2	FRG1JP	TMA16	AC032044.1	AL022328.2	AL445490.1	MIR3122
	AL513523.2	EID2B	STK16	AMOTL1	POFUT2	ENOPH1	SCMH1	LCMT2	TOR1AIP2	AC004943.1	RUNX1	ZNF653	NRIR	PTCD2	TMEM256	CYBA	GEMIN7-AS1	SLC27A2	CHIAP3	NPM1
	AC242426.2	CTPS2	ALS2CL	FOXF2	RNU4-52P	CETN4P	RAB23	AL358933.1	ALDH1L1	AC092835.1	SPIB	AC018761.3	RF00092	PDE6B	CATSPER2	ITGB1BP1	PBX1	AL445472.1	TOB2	CDKN2A
	TOR2A	MRE11	AC124248.1	PLAC9	AC004890.1	SETP17	SDF2	APOA1-AS	SBK1	RELCH	SNHG21	SLC52A2	SLC27A6	MRPL12	XXYLT1	DUSP11	INCA1	MATN3	PSMD14	CXCL8
	OAT	FO393419.3	AL139396.1	PPFIA4	GRAMD2A	ZDHHC1	PTPRA	ULK4P2	ABRAXAS2	TIGD7	DSG2	GPD1L	RNY3P16	AC022634.1	MFSD12	AC007098.1	RPL6P27	LIPA	EML4	FTH1P10
	METTL21C	MATN1-AS1	CIT	RAP1AP	AC025165.4	AC007563.1	ZNF461	AC137630.1	HECTD4	BCAP31	GPAT4	NBPF1	HDX	RPS15A	RNF10	AL138781.1	NTN5	HUWE1	TP53I3	NUDT7
	NR2C2	HSPD1P10	C22orf39	FCGR2B	ZNF878	KRT8P33	AC098617.1	AC138904.1	P4HA2	HMCN1	SLC39A14	TGFBR2	EDF1	STAG3L3	COTL1	MRFAP1	RPS29	ASH1L	HMMR	AC011530.1
	AC079313.1	SUGT1	NMNAT3	CENPJ	RPL14	MAP3K11	MTUS2	AL133367.1	TMEM62	TGFBI	HPCAL1	RN7SL262P	GSS	AC234782.1	AGAP3	AP002884.3	TBC1D8B	SPIRE2	SLC11A2	DCAKD
	LINC01845	SLFNL1	CORO1B	AC138150.2	CPD	NOS1AP	LINC02321	ATL1	SBSN	GSTP1	C1orf220	AC133552.1	KCTD19	AC020765.2	PNMA6A	AC026704.1	PCLAF	EIF2AK4	EXOG	NACAD
	SYT7	C20orf144	CHSY1	MTND5P11	CCDC180	SAR1B	CABLES2	AC079313.2	GRN	PPP1R3D	CCNI	TOM1L1	ELOVL6	CAPZB	AC008870.3	PAQR4	DNA2	ZMYM1	LHFPL2	LINC01952
	LAMB1	RUSC1	SUPT16H	AC091906.1	FGFR1	BTRC	AAMP	AC022146.2	LENG9	SH3BGR	CSDC2	AC137695.1	CYP27C1	LINC00921	AC008897.3	TRAJ1	TSPAN9	AC009093.4	TMEM47	MDC1-AS1
	AC090004.1	HDAC11	SEL1L2	ZMYM3	MMS22L	HPGDS	RARG	GTSE1	SLCO2B1	SIL1	HDAC6	PSMA1	KLHDC2	MRGPRF-AS1	DSE	VPS54	AP000692.1	AP001830.1	PRIM2	CDCA2
	AC135721.1	PRIMA1	LYPLAL1-DT	XRCC2	LINC01058	BFSP1	SET	AC009949.1	B3GAT2	FTLP12	OR10AB1P	ZNF14	TMPO	SCRN1	SUSD4	AC145207.5	CSNK1G2P1	AC026356.1	ARHGEF9	IGFBP6
	COL6A3	B3GALNT2	TWIST1	SEPSECS-AS1	Z83844.1	AC126773.2	AC000068.2	PXT1	SMARCAL1	TXN	SYNE1	SLC7A15P	RABEPK	NEMP1	COL16A1	INO80E	AL161629.1	LRTOMT	AC114495.2	TMEM31
	GUK1	ASGR1	RERE-AS1	RIMKLA	CNN2P9	PTP4A2P2	SLC9A1	ELOVL3	AC084880.3	MTCO3P11	SPDYE6	TMEM127	LINC01106	ZNF311	AP3S1	TRPC3	AC104667.2	P2RX1	AC093801.1	TENM3
	SSB	ASB9P1	ZFHX2	AC093249.2	AC133552.3	MIR4479	DAAM1	LRRC23	NAV2-AS2	AC092809.2	DSC2	GOLGA1	MRPL51	ATG4C	ANLN	MCL1	AC092279.2	SPON2	PLXDC1	CYP2F2P
	AC073569.2	COLCA1	LMF1-AS1	AC012213.3	PES1	ACTG1P17	ERCC6L	ZNF354B	AC099489.1	MYO9A	USP27X-AS1	AL662791.1	AL049612.1	LAPTM5	AC072039.1	AC009142.1	INTS7	MPV17	MSTO2P	AC004233.3
	DUTP2	HMGN2P9	ZNF321P	AC097381.1	LINC00839	HSCB	AL590666.2	DDX54	EFHD2	AP002748.4	FTH1P3	PDK2	TYMS	DVL1	AC015871.3	LINC01778	AL135791.1	ZNF34	LINC02620	RTF1
	CCNY	CCDC18	TDGF1P6	AC008429.1	ACVRL1	TNNI3K	SPRED2	MED14	AL365205.1	CCR1	ADCY5	ICA1L	SMIM3	ADH6	AC073569.3	ATP5F1E	TCEA1P3	PPP1CA	DAGLB	MIR3945HG
	DERL3	ELF2	CNTNAP3P2	ITGA9-AS1	Z95114.3	RAP1GAP2	IMPDH1P6	AC226101.1	LRRC36	MRI1	COMMD1	PHIP	LILRA6	CLEC5A	IBSP	AP003486.1	SLC6A17	SCAND2P	GTF3A	LINC01151
	AC005785.1	CSF1	AC020908.1	PTX4	DDIT4	CPEB2-DT	OSGIN1	MTCO1P28	GALNT5	MYL6P5	RBMXL1	HCFC1	Z82195.2	RNF11	MDH2	B3GNT7	LINC01569	NPNT	MIR548C	RAD51C
	AC137932.1	RPS27	FUT4	SAMM50	NUP188	AL359643.3	PITPNM3	CLCC1	LINC01629	LXN	RTEL1	ACTG1P10	AL683813.1	CTSC	AC004233.4	C19orf24	AC068831.1	S100PBP	AC005041.1	RLF
	SQLE	NUF2	LINC01154	ELAC1	RFT1	ADK	FTLP2	CAB39P1	TTI1	TRIM39	HMGN2P5	CEP295NL	GPR137B	RACGAP1	AC009120.3	LINC01534	GOLGA5	ZNF83	AC242376.2	WWC1
	AC087721.1	AC012615.6	AC018992.1	SPC25	NKTR	POSTN	TMEM61	AC018904.1	AC026471.2	SNX18P3	XKR5	RAB1B	TMEM120A	AL136084.3	GINS4	ECT2	UBE2D3-AS1	ZHX2	EXO5	FTH1P20
	RPS7P1	JKAMP	MRPL3	ANXA2	NT5DC1	GNG10	F13A1	OSTCP8	TAF10	AC083805.2	ZNF283	AL139220.2	ANKRD33B	SAT2	CIB2	LRRC37A2	AC012313.1	AC079340.1	AP000442.1	JAZF1
	AC007786.1	AL359091.5	ST6GAL2-IT1	TMEM163	GEMIN6	AC074029.1	AC093249.6	RAB13	RPLP1	TIMP1	FEM1B	PC	LINC01770	GNL3	MTRNR2L4	RN7SL399P	CCDC168	PRIM1	ANKRD36BP2	AL358852.1
	GIPC3	LMBR1L	KRT8P32	CTHRC1	PROB1	TMEM192	RNU6-204P	RAD51D	AC139887.2	LGALS1	CH25H	SMIM29	LBX2-AS1	PRDX1	RNA5SP18	C9orf40	AC091180.2	AP001972.3	AC010463.3	SLIT2
	MDH1B	BEND5	PTGDR	PF4	ABCB8	DPY19L3	AC007182.2	AL035587.1	TRAJ35	AC018648.1	RSKR	AC008121.2	CAMK2N2	AP001269.3	TPM1-AS	DUSP7	Z94721.1	BCO2	AC079140.2	BNIP3P28
	FCER1G	FBXO30	CSTB	MGAT1	AL451085.1	AP000907.2	REXO4	AC103858.1	IL18R1	SFXN3	RNF217-AS1	AL590490.1	AC073111.1	IFITM10	FTH1P23	AL135999.1	NUP155	COA4	RN7SL268P	COMMD3
	AF305872.1	CEP78	AC005954.2	AC006557.5	RCC2P4	SLC9A8	AP003469.2	UBE2J2	FAM95B1	WDR18	MROH7-TTC4	MARS	ENTR1	C4orf3	ARMC3	RNPC3	AC018665.1	Z92544.1	ZC3H15	CNDP2
	MAGI1	SOX30	RPRD1A	AC027237.4	ORAI2	BMS1	TMEM171	LIX1L-AS1	EIF2AK1	GRAMD4	B3GNT10	AC111170.3	AC055855.1	EFCAB2	ZNF843	ANAPC4	AP001453.3	AC116312.1	AC099509.2	AC090673.1
	MIR8055	NFX1	TSR3	AL590762.2	AC005911.1	C16orf72	ZNF385A	OLFML3	RAET1E	AC010886.1	UTS2B	MAN1A1	RPS27L	NASP	FAM86DP	SLC6A15	ITGAM	LINC02608	MECP2	TXNL4A
	PDAP1	MIR647	AC009549.1	TSPAN13	MDC1	KCNA5	AC011815.3	IMP4	AL021878.2	RB1	MVP	TMEM106C	DRAM1	KIF20A	CES5A	AL117381.1	PRKCSH	AL049647.1	GLYATL1B	CCT6P3
	HERC5	AC092164.1	AC093158.1	NUBPL	AL450338.1	FLNA	CD300C	ZSCAN29	AC073592.1	ERVK13-1	EMC8	AC005920.4	DM1-AS	FAM27E3	SETD6	GPATCH2L	DTX2P1-UPK3BP1-PMS2P11	AC025171.5	RPS2P7	RIC8A
	XRCC3	AL512326.3	GNAS	DOT1L	C1orf226	NRAS	DNAL4	XAF1	VIPR1	AC116533.1	MAD1L1	OTULIN	ZC4H2	SLC4A7	AC006160.1	GNG8	KDM5B	HOMER3-AS1	CHIC2	PDXK
	UNC5CL	RAB8B	RGN	CKAP2L	LENG8	LSM6	TMEM101	ASAP3	FTH1P16	AC092903.1	RF00322	EMP3	CXCL5	AL109809.1	SLC8B1	LBR	RAB21	NME2	MTHFD2L	AC002094.5
	MAPKAPK5-AS1	BSPRY	AKR1D1P1	IST1	SATB1	CACUL1	TMEM9B-AS1	DCTN1	TEX30	CSPG5	AC246787.1	AC103858.2	FXYD5	LRRC37B	C17orf75	FERP1	ZMAT1	TTC27	TNRC18P1	AL162586.1
	PAUPAR	AC100821.2	ZNF726	C8orf76	SEPHS2	ZXDB	MOB3A	UBXN8	ARPP19	ADAM12	AC120049.1	STT3A	HMBS	FANK1	MEG9	AC020604.1	SLC47A1P1	OTUD1	ZBED8	AC106886.2
	PAWR	AC096921.2	CHST10	RNY1P9	AMD1P3	AC068733.1	AC099677.1	AC022819.1	WDR48	AC008875.1	STAC2	ID3	RITA1	RCCD1	AC010442.1	EOGT	OR4C6	FAM129B	MRPL38	FTH1P15
	AC090510.2	LYPD5	MIDN	RGS10	TWF2	AC073957.3	ZSWIM3	CDS2	SF3B5	CD68	GUSBP4	AL135818.2	GALNT11	ADIPOR2	KRT17P8	CBR3-AS1	DISC1	WDFY1	GINS2	ATP5MC2
	AP000802.1	HIST1H2BK	AC119396.1	PHC2	LRRC8C-DT	FTH1P2	AC103740.2	AC022916.1	DBIL5P	AP000873.4	SLC12A9	AC104777.2	FAM242F	PRIMPOL	DNAJB9	MMAB	HOTAIRM1	MIR600HG	KLHL25	AC145285.2
	NUTM2G	AC113382.1	PARK7	TMEM236	CTBS	PTK2B	TRMT10BP1	NDUFB2	AC010327.3	LINC02445	IRAK3	DPF1	METTL21A	AC234782.2	ITPA	PPP1R1B	RPL36A	RN7SL23P	AC009120.1	AC015959.1
	PIK3R2	FBXO46	EGF	FAM129A	AC002524.1	MIR635	LINC02094	POLE	SCARNA22	B4GALT6	LINC00092	FAM86B3P	CLTA	BX322650.1	USP11	SNORA22	FAM122B	ECHS1	MAP1B	RNF181
	AL022341.2	RF00003	HSPB11	FUCA1	AC098679.4	CEP83-DT	AEBP1	GNA15	TMEM14C	BSG	AC107375.1	MTND5P14	KRT18P17	AC064799.2	AC131649.2	RNF187	SPAG7	GTSE1-DT	AL139811.1	FAM114A1
	KCNJ3	FHOD3	AC114296.1	ATP2C1	AP001476.2	HMGXB4	MIR302A	IL10RB	MAP2K7	PPBP	MOG	DPY19L2P5	SOCS5	RRP12	SLC9A3-AS1	AP001258.1	CPM	AC241952.1	AL161935.1	AC021078.1
	LAMTOR2	BTC	FBN1	RIDA	SNHG5	DNAJB13	CAPN1	ZNF711	LINC00670	HMOX2	MFSD14B	GOLGA7	WDFY2	CLTRN	AC008894.2	AP005329.2	CT62	FGF7P6	AL591926.2	LINC01270
	CAMK2A	AC009090.3	GRASP	ZDHHC13	LDB3	SLC27A3	ARL8A	UHRF1BP1	WFDC3	LDLRAD2	BNIP3P27	ENPP7P6	CD33	RAB27A	RIOX2	IQCJ-SCHIP1-AS1	FPGS	ENPP7P4	TTC13	HM13-AS1
	AC010551.2	TRDV3	CFLAR-AS1	DNAH11	AL590999.1	MTHFR	LMF1	AL355480.1	AC079630.1	RPS6KA6	EGFL8	SH2B1	AP003355.3	AL031705.1	NIPSNAP2	GJC1	ZBTB25	FGFRL1	AP001269.2	LAMA5
	SORCS2	ZNF724	CCDC107	EMG1	RPL18AP3	AC006449.2	DAB2IP	SWI5	STAG3L5P	HERC2P9	AL139423.1	ERAS	MANEA-DT	AC022210.1	VMO1	PSORS1C2	MAGED1	DUS1L	CXCL6	PDE1C
	AL161891.1	LRRC20	AP2A1	AL442663.3	KLHL30-AS1	FAM229A	GADD45B	AC007969.1	CLIP3	PQLC3	PTCHD1-AS	AC091182.1	LINC01229	KLHL30	ASMTL-AS1	AL163636.2	PANX2	RBBP4	SRC	AC008735.1
	AC008537.3	GPR161	PLPP1	TRAJ8	DHRS1	ALMS1	DENR	HPS6	TCEANC	AC093525.8	AL358332.1	PRDX2P3	PHF1	TUBGCP2	VDAC2	CPT1B	LUZP2	AC090844.3	COPB1	CTBP1-AS
	AL049795.1	MRPL41	ROPN1B	MIR5581	AL121917.1	AC104073.2	ATOX1	AC141557.2	SNAPIN	GM2A	IFNAR1	MRPL15	AC244197.3	RPL18P10	VSTM2L	MIR22HG	DPH5	SLX4	SORCS3	HOXB5
	GRB14	SEC31A	NUMB	CYB5R2	NDUFA3P4	TRMT9B	AC107959.3	CTSO	ZNF559	WWOX	HIST1H2APS4	MFSD11	AC002310.2	AC243964.2	GOLGA8N	REEP5	TMEM131L	RPL13AP7	LINC00881	AC093567.1
	SZT2-AS1	PLEKHM2	SOCS2-AS1	FTLP3	POLK	ALG13-AS1	LRIT3	DNAJC24	AP001528.1	AZIN2	BAALC-AS1	LRRC34	AC005746.1	RNU6-529P	SH3BP5-AS1	AC099560.1	SAP30	ZNF318	NBEAL2	PLD3
	AL139349.1	MTHFD1	AL512791.1	AL807757.1	RPL37	AL031009.1	CFDP1	GAS1RR	CCL13	TYROBP	AC008747.1	ANKRD49	C1QTNF1	CNPY3	EIF4EBP2P2	CXCL12	LIMS2	COL6A1	ZDHHC15	TAF5L
	KCNMB2	DEAF1	CMTR1	COL4A6	AC026333.4	AC074135.1	SMG1	STIP1	LINC02373	TMEM40	SAMD8	MKRN3	JADE1	AURKAIP1	AL354718.3	AC108718.1	ISYNA1	AC131009.1	TIMM22	AC020634.1
	SNTA1	AKAP8	ZNF670	CLIP2	AC010261.2	LRRC3-DT	MAF	SCARB2	GOLGA8UP	AC079610.1	CNTNAP3	AC074138.1	AL160394.1	NPRL3	ACSBG2	ATP6V0B	MTND6P21	HERC2P2	CRYBG2	GUSBP2
	AC019186.1	AC022034.3	TRIM80P	GABBR1	GOPC	PIH1D2	ZNF174	AC006557.1	ZNF346-IT1	ZNRD1ASP	RNASEH2A	SLC22A18AS	AC091544.2	TMEM223	AL031666.1	AC003956.1	ZSCAN12P1	AL451064.2	GPR19	CXCL1
	AP002026.1	POLR3D	AL023583.1	HYI	AL590762.1	SERPINB6	AC005730.2	BTBD2	CNTN3	CLDN9	OTUB2	AC007563.2	TMEM231	SNAI1	AL162311.2	BOLA2P2	GALNT2	AC007485.2	LINC02021	TRPM4
	AL121845.4	AL445991.1	FAM8A1	PHETA2	TMA7	NINJ1	EIF3F	RAB2B	RPL22P2	CTSV	AL121917.2	LINC00663	ZNF665	PTGES2	RPL7L1P9	AC126177.3	CDC5L	CPTP	HADHB	ZRSR2
	TEAD1	C21orf62-AS1	PDK3	QARS	CILP2	AL592437.2	TOM1L2	SNRNP27	JOSD2	TRAPPC2L	MLF2	TTC39B	AC136628.3	AC104113.1	IL12RB2	RTL8C	MICE	COL3A1	VWC2L-IT1	RETREG3
	RNU6-228P	ANGPTL4	AL139420.1	ST6GALNAC6	BRICD5	AL353768.1	SNF8	AL109945.1	FCGR1A	ZSCAN32	BCOR	AL355922.2	SEPT11	NACC2	TBC1D20	CTC1	AC016769.3	AL359504.2	TUFM	FAM45BP
	RECK	TRAPPC13	TPM2	CYP21A2	MSNP1	PRKAG2	LILRB5	RPS10	RBPMS2	STPG1	TMED7	FGF14	ACADM	NECAP1	SLC5A6	MMP1	CACNA2D4	PEPD	CDC42EP2	MAP2K2
	AL391903.1	AC007991.3	SNHG6	TP73-AS1	ATP2B1-AS1	GNRH1	C2orf92	LDHA	TRAJ10	RN7SL535P	RAD51AP1	AC138028.3	AC092171.3	AL357078.1	ATG10	RPL22P4	ANGPTL2	AARS	TOLLIP	SCML2P2
	LINC00310	AC107956.1	CAMSAP1	AL158801.4	NUDT16L1	PPP2R5A	ZNF823	AC093151.2	STMN4	MED19	UBR2	AL513122.2	FAM107B	FNBP1P1	AC008417.1	PDE9A	LINC01563	RNA5SP201	PDCD11	AC092111.1
	ZNF559-ZNF177	AC018628.1	AP006565.1	MYL12A	FAN1	AC105265.1	PLPPR4	AC005586.2	AL136295.2	ANAPC1P1	RF00017	RABAC1	CNOT11	ENPP2	MIR6739	NDST2	FN1	MS4A4A	EEF1AKMT2	PPIC
	AC099518.4	IL17RE	AC093225.1	TRIM13	FOXO6	GPC6	SF3B2	AL354836.1	C1orf185	MDFI	CDC42BPG	MACO1	MIF4GD	SLC16A3	MTND1P8	PAK2	AC105339.5	THUMPD2	HNRNPH1P1	AC104662.2
	AL355388.2	CXCL3	RPA1	AC020910.5	AC002116.2	HCG15	SELENOS	RNU6ATAC24P	BX322635.1	AC100793.3	RPL21P16	SNORA73B	AC116552.1	RNU6-50P	SRPRA	AC123904.1	ZNF469	SIX2	TMCO6	AC007346.1
	METTL9	KIF1BP	AC139887.4	RAD1	TMEM161B-AS1	RRP7A	ZNF300	IL2RA	TCEAL3	AC016700.1	LINC02547	STARD13-AS	MMP25-AS1	KCTD12	RF01241	AC068338.3	AL031289.1	GPSM2	SFT2D1	SPSB4
	PDIA3P2	AC090912.2	CDC42	ALG1L	FANCM	H6PD	AC099681.1	RBM41	CDC14C	SHROOM3	CSTA	RPS6KA4	CHI3L2	NSUN5P2	CDC37P2	AP000897.2	LMLN	ARAP1-AS2	UST	CES1
	DUSP8	AC008735.2	CYB5R3	AC113386.1	FBXL15	LRRC7	SERTM2	ATP6V1A	AC026471.6	AC008403.1	AL008582.1	MCCC2	GIHCG	HOXD1	VARS	FAM221A	PLXND1	ATMIN	ZNF81	AL096678.1
	AL023803.2	USP31	PSMG3	AKR7A2P1	HS6ST3	LINC00535	FOLR2	SAA1	MRPS7	TBX18-AS1	RPS27P16	AL355480.3	SLC31A1	CENPE	AP000317.1	HOXA3	PATE4	AC104435.2	AC021106.1	RN7SL502P
	AL354989.1	IGHD4-11	ZNF713	AC133552.4	LASP1	RASGRP4	MAGEL2	IQCE	AL121753.2	ARHGAP6	CEP76	HMGB1P49	ZDHHC3	HIPK2	SLC7A8	STEAP2	BANF1	TMEM217	WNT5A	RASA3
	LINC01424	UBE2DNL	AC106037.2	AL022476.1	CLEC4GP1	AC024267.6	UIMC1	WDR75	EVI5L	GGT7	C11orf71	PHYHIPL	PRPF39	KCNN2	SRGAP2	NOXA1	LINC01337	AC012213.4	RCBTB1	ALDOAP1
	TMTC3	AC004982.1	FZD8	HMGB1P39	R3HDM4	WDR27	DECR1	SCARA3	RN7SL122P	FAM181A-AS1	GAR1	HS3ST3B1	AC015911.3	PTPA	ADGRL3	AL512785.2	AC112484.2	ABCA3	AC005162.2	C22orf23
	AL133370.1	AC007216.4	AC093423.2	ZNF75A	TRIM69	KANSL1L	BEST2	CEBPB	AL137847.1	AL132780.1	LINC02227	EEF1A1P33	AC020661.1	MOXD1	AC010761.5	TAOK3	EXOSC7	GMNN	CAB39	AL354977.1
	AC008434.1	KCNA4	H2AFY2	GALM	KIAA0895	MIR4701	CCDC183	SLC12A8	C19orf71	ZNF503-AS2	AC107884.2	GUCY1B2	AC117386.1	HMGB1P40	AP001453.1	WDR89	PPFIA2	E2F7	AC073534.2	LAT
	HIST1H2BO	CD209	FEN1P1	CSF1R	AC011625.1	CASC4	EIF4EBP2	CTDSPL2	GXYLT1	ORAI3	AC108482.1	ARHGEF10L	AL139300.2	TSN	AC007686.1	AC254562.3	AC092145.1	DGKH	LINC01929	LINC01714
	LINC02447	EXOC1L	AL049780.2	SRBD1	AC109326.1	AC012618.1	MAP10	LCE5A	RN7SL832P	EN1	MT-TP	RF00191	AP001767.4	AC007792.1	GEMIN8	TRIM7	INTS4P2	AL021578.1	TANC2	CNOT10
	PARP6	LINC00574	ARL5A	C4BPB	AL121672.1	HOXD13	AC092675.1	NKX2-5	LINC01962	TUBB3	HMGN4	AL365181.1	HELLPAR	TMEM138	ARPC4-TTLL3	AC234782.3	RAPGEFL1	CARD6	R3HCC1L	AL136172.1
	AC073842.2	DEFB131B	AC078785.1	RPL13P12	RPL9P29	CDC123	FBXL7	NCOA4P2	TRIM52	SGF29	MIR4786	BTG1P1	MTHFD2P1	MRPL39	RN7SL376P	NMD3	AC008752.3	AHDC1	LINC02215	OSCAR
	AP003390.1	AC002558.3	AC011825.2	RPL21P133	MPPE1	AL109976.1	JPT1	L34079.2	MEG8	SGSH	HS3ST3A1	MTND5P1	AL049870.1	C5orf51	MUS81	MX1	NDUFB8	FNDC10	LAMP2	AC002059.2
	DIAPH1	PITRM1-AS1	NEIL1	B3GNTL1	VPS9D1	AC010618.4	ITGB3BP	C1orf195	AL359510.2	UBE2FP3	ADRA2A	RANP4	MAP3K14-AS1	DPYSL5	MORF4L2-AS1	TRAJ40	HIST1H2BC	AC096992.2	RF00618	HAUS1
	BICRAL	WT1	SRP14-AS1	AC012213.1	PGM3	AL731533.2	ANP32E	RFX2	AC113346.1	ASTN2-AS1	KRT8P15	EIF3E	PQLC2	ZNF385D	AC022415.1	ZNF232	GPR137C	AC245884.4	SIRT3	IGHMBP2
	JARID2	AC135506.1	FCGR1CP	ODF2L	PCNA	ZNF611	UBC	TRNP1	AC015909.5	TERF2IP	FLVCR1-DT	EID1	AKAP17A	TMEM252	XRCC6P5	LRG1	AP001269.1	GRPEL1	MT-ND3	YWHAE
	CD163	AL031663.3	PDXP	ZNF302	AC003986.2	LINC01323	RGS22	GNA11	RN7SL417P	CCS	COMMD7	BEX3	CR1	KLHL11	NMB	AP006621.3	CEP192	SERPINB7	LRRN4CL	AC026801.2
	ALG1	CCDC125	ITPRIP	KIF27	AL022334.1	AP2M1	SKA2	MCPH1	AL731566.1	SH3BGRL	TRAJ45	CDKL3	AL031714.1	TSPYL4	AL603832.1	LINC02256	LSP1P4	SUPT20HL1	AC008443.1	ARF5
	DRD2	STX6	EPN2	USP36	CCNYL1	ZWINT	AC018695.7	AL078590.2	TBX19	METTL4	MAMDC4	POP7	GABRR2	RCE1	ST3GAL1P1	AC087752.2	EME1	AC138956.2	ZFP28	SLC16A6P1
	KIAA1549L	AL031736.1	PRKD3	HEPH	PRELID1P4	CST2	AC006449.6	RN7SKP118	AC012313.10	SNORA15B-2	AC068580.4	CDKN2A-DT	MAPKAPK2	SMG1P3	THEM6	AC011247.1	MIR4263	HDAC7	NSUN5P1	GNAL
	PLXNB3	AC004448.2	NBPF12	CCDC127	LINC00893	TRIM23	AC138028.4	MCM6	DERL1	HNRNPA1P70	AL031600.1	PNCK	PRKAB2	SRSF11	AC016737.2	AC100810.1	LIF-AS1	BLCAP	TMEM255B	SEPT10
	PARM1	AL133406.1	POMP	AC008894.3	CPSF6	AL049840.1	YTHDC2	UBXN2B	AL365338.1	THSD4-AS1	AC009093.6	PQLC1	HMGN2P7	TEP1	PCDH12	SRCAP	SHISA8	AC138932.1	SLC16A5	MAPT
	MSR1	AP006621.5	AC016065.2	SLC25A35	SPDYE2	WDTC1	IPO9	LEF1-AS1	AL365356.4	LINC01443	NODAL	TRAJ19	FGF5	AC002454.1	ZNF593	MBNL1	GIN1	AP003032.1	AC040934.1	LINC02126
	SEC24D	SLC44A3-AS1	RNU6-875P	TMPRSS6	KIAA2013	ZNRF2P1	TTLL5	C2CD3	SUPT4H1	RNA5SP383	RPL15P3	PSMA3-AS1	SLC25A53	RAD9B	SZRD1	AC003001.1	TRDJ3	FTH1P12	AC007000.1	CCL23
	PCNX2	AL513366.1	DUSP26	ZNF500	AL590365.1	MAGOH2P	HRCT1	AC104619.1	VSIG8	RTBDN	AC004923.1	AL669942.1	LINC00528	UBAP2	AP000974.1	MCM7	ARV1	AL133406.2	AP002490.1	MIR3671
	AC027319.1	SLC20A2	AC113192.4	AC008443.5	AC127502.1	AL139156.2	RAB40B	ADIRF-AS1	AC138028.2	CREBRF	RABL3	NAV2-AS3	NIFK-AS1	ENPP7P12	GPR89B	SNX6P1	ABHD3	NLRP12	NDUFB2-AS1	NPM1P42
	AL136295.7	SOCS2	TRIM37	HMGN1P4	C19orf53	ZNF829	AP001021.1	AL391422.4	AC067930.4	TPP1	SLC19A1	GPATCH1	AL672291.1	UBE2Q2	AC091849.1	ZNF445	NXPH2	SLC25A4	AL353804.1	STAC3
	AC132008.2	AL137784.1	DDB1	AP003084.1	EVI5	TEKT4P2	MMADHC	ZNF782	AL606469.1	RFLNA	HSF2	LY96	ENTPD3	ZNF382	AL590143.1	ADM	AC025569.1	HIST1H2AC	SNX24	AL031587.5
	ZNF625-ZNF20	AC106712.1	CDC42EP4	AC123595.1	AC100788.1	CNN2	COX6CP7	ECM1	SNRNP35	VDR	LAIR1	AC124944.3	AC084819.1	SEMA3C	NOP16	DESI1	AC093249.4	GPAT2P2	RF00275	AC021739.3
	CDK9	OGFOD1P1	FOXO4	LINC01754	AC012170.2	ACCS	SAP30L-AS1	DLG3-AS1	AL161431.1	FOXRED1	LY86	COX20	FTH1P8	HOGA1	SYNGAP1	ANKRD20A18P	TCEAL6	FLI1	ARMC8P1	TRAJ2
	GPR17	RPL7P57	AL022724.1	SP5	PDE4DIPP1	C3AR1	RF00019	FANCD2OS	PIAS1	LBX2	AC005730.1	TMEM245	AL121772.3	ATP11C	AC109446.4	BDP1	PTP4A2	MCPH1-AS1	SMPDL3A	SEPT7P6
	CPN2	LINC01271	TRIM33	AC127024.8	WHAMMP2	C1S	AC013565.1	AC011466.2	CGREF1	TMC7	FCGR1B	AC005840.4	MPRIP	THAP5P1	C18orf25	TRAJ24	ZNF137P	PRNP	ISCU	AL121985.3
	C1R	AC234782.4	KLHL26	IBA57-DT	BTF3P10	MED20	AC106820.3	AL592435.1	AC131888.1	FTH1P11	HCK	AC007566.1	SPP1	AL731571.1	DEUP1	AC099811.4	AL021707.7	AC017048.3	HBEGF	PEX5
	MFSD3	CLDN12	ACOXL-AS1	CR788268.1	AC113167.1	SART1	SACS-AS1	EPHA3	FAM91A1	SUMO2P15	CALCOCO2	FRMD4A	STUB1	SPATA8	AC069213.3	DDX11	LINC00466	ARPC4	ZNF880	AL138690.1
	BEST4	PPM1E	SPART	METTL22	KIAA1328	TMEM59	PDPK1	TGFB1I1	YBX1	AC012456.2	ARHGEF18	AC067817.2	AC095032.1	DPM2	AC006333.2	RNU5E-10P	ZNF578	ZNF41	SLFN12L	ZNF585B
	AL359317.2	TMEM56-RWDD3	AC233992.2	AC080188.2	AL159169.2	MIR137HG	HSP90AA1	RHAG	AC090515.5	LRP2BP	SKP1P1	COG6	B4GALT3	LINC01550	RNU6-677P	TMEM121	TRAJ42	AC092296.2	ANKRD36	KIAA1671
	STX16-NPEPL1	CASC3	PPP1R18	RNF216P1	EHBP1L1	AC013439.1	ALOX5	C8orf48	GMFB	HNRNPA3P12	LINC01841	WIPF1	AZIN1	MIR623	TPX2	SH3YL1	AC108047.1	ADAM10	ZDHHC21	PLA2G4B
	RNU6-171P	RSPH9	LAPTM4B	GPR62	POLH	YRDC	GNPNAT1	AC122134.1	AKR1A1	SRGN	RN7SKP80	SPIC	MANSC4	ATP5MC3	PSMB7	SNRPD2	SPANXC	SLC37A4	OR2B6	NTN4
	ZBTB9	TEX10	CD177	AC091185.1	GALNT16	CCDC170	TSPAN33	RAD54L2	OVCH2	ZNF433-AS1	AGBL5	NPY	ABCB7	MORN4	FRS3	MED12	C19orf47	GHET1	NME1-NME2	OPHN1
	UPF3B	AC083805.1	ZNF32	ACBD7	AC004233.1	AC011978.2	MCEMP1	KRT17	CPVL	UBE2Z	CPSF4	FLVCR1	KCNK3	CEBPZ	TMEM139	MYCBPAP	PCP2	AC093503.3	LINC00957	AC087286.2
	CELF3	RIMS2	USP46	TENM3-AS1	TMEM238	ARHGAP22	AP5S1	AIPL1	RF02271	AL161457.1	RLN1	AP000436.1	RNF165	C9orf72	ZNF658B	TPRG1	MIR4538	IRX1P1	ZP1	PRICKLE1
	AC112777.1	AP5Z1	CEP350	LYSMD4	FAM20A	AP000866.5	MIR6783	PHF12	AC126755.1	NLN	AC253536.3	RPL13AP3	AC140134.1	EIF2S2P5	AC010186.4	OOEP-AS1	AC067750.1	SLC45A3	AL121601.1	TBC1D29P
	UGGT1	AC135803.1	Z99716.1	AC106782.5	PPP4C	BMF	LINC01117	SPACA5	PPIAP4	MTBP	DTX2P1	HEXB	C1QBP	SYNJ1	LINC01444	ILDR2	TLR2	AGO1	AC233992.3	AC007684.1
	TSPAN17	LINC01124	SNRPFP1	AC104109.2	RPL29P33	AC000032.1	UVSSA	AC022568.1	BAK1P2	DDX58	TRAJ37	TMEM230	LINC02615	TAB2	AC097468.3	ALAS2	MGA	FAF1	SLC4A11	RANBP9
	AL035456.1	NUMBL	AC120114.3	CCDC59	AL354919.2	ZNF512B	RSL1D1	AC009690.2	EPM2AIP1	LINC02175	Z68871.1	AC136188.1	DCUN1D4	TADA1	SNX16	AC010904.2	HOXA5	PTOV1-AS1	AC093010.1	MAPK3
	EXOC1	BAHCC1	TPM1	AC090587.2	SLC49A3	BTN2A1	AC090912.3	URB1	NCF4	PPARGC1A	GTF3C2	AL135746.1	AL353807.4	TP53TG1	AL512343.1	PXDN	ARSEP1	AP001496.1	RERE	EBF2
	AC115223.1	AC005253.1	CCDC24	HP1BP3	LINC00240	AC092803.2	SALL2	TRIM3	WDHD1	DUSP5P2	MORC3	RANBP17	NARF-IT1	PARP14	AL031673.1	IPMK	MAMLD1	ARHGAP20	RSPH14	ZNF227
	CR936218.1	AC121757.1	UTRN	CCDC185	ACTG1P3	PPFIBP1	CWF19L1	HAS3	AL645504.1	AC015802.2	ICE2	PPM1G	PPARG	AP001189.3	AC008696.1	TEX38	BX664727.3	CCDC191	DNMBP-AS1	RNU6-190P
	AC110053.1	AC026888.1	AC011676.3	NOL10	PUS7	ADGRB2	CHP1	HACD1	SMARCB1	AC092718.2	DUSP6	SNHG7	GIP	GNG4	AC079336.5	TEX12	HK3	DNMBP	UBE2I	RNU6-882P
	AC007191.1	ARMC10	LINC02390	LINC01429	PHLPP1	PLA2G4C-AS1	AC073316.3	PIP4P1	C17orf80	SLC25A26	AC074375.1	BCLAF3	RRN3P2	AL512791.2	RNU6-890P	TRIM38	NDST1	ALDH8A1	AC064853.1	AC090751.1
	FUZ	AC097637.2	RPL39P3	TMCO4	AC092597.1	LAG3	CUEDC1	RPL17P36	OR7E155P	AC123768.1	AK1	CTBP2P8	TXLNB	TRIP12	ARHGAP42	AC007292.1	TSSK6	IFIT1P1	AP000797.3	LTV1
	DDX20	AP003555.2	AC005306.1	CA3	ZNHIT3	ACBD3	STAT2	LINC02150	VPS13C	GAS6-AS1	PSMD3	IPPK	ELOB	AC078777.1	RPS6P8	GPR84	JUNB	BANF1P1	AC009988.1	ZNF607
	ENPP7P5	C3orf86	ADAM20P1	GATC	TCTN1	AC099336.1	ST7-OT4	PHOSPHO2	RTKN2	AL589765.7	TIMM10	TAF1D	EBF4	PPIAP77	AL354824.2	ZNF101	COL21A1	KANSL1	SNORD114-3	HPSE
	MKNK1-AS1	GK-AS1	AL139022.1	AC104237.2	MCCD1P1	AP003096.1	TEX29	ATG4B	C12orf66	AC127502.2	KIAA1143	AL357315.2	TFCP2	CCDC115	GDF11	UQCR10	AC117503.3	AL008721.2	AL355802.1	KIF11
	AC026954.2	AC011491.2	AC084706.1	GLULP4	AC103740.1	AC087289.2	AL121574.1	RPL17P22	AC104123.1	AL135937.1	AC114491.1	HSPE1	RLN2	AP001107.3	CICP14	ZNF211	CHIAP1	SLC22A5	SMAD4	RN7SL610P
	CHN1	TTC3P1	KCNB1	MAGIX	POLD4	SLC16A4	AL137127.1	PHACTR4	KRT8P46	RFX8	ARHGEF35	ZNF292	C5orf24	OGT	AL590609.2	AC018629.1	XXYLT1-AS2	AL590326.1	AC091544.4	RPS7P4
	SEC23IP	AIF1	AC021087.3	AL359881.1	EAF1-AS1	KRT18P42	DNM3OS	AC107983.1	PKMYT1	RNU1-96P	SPOPL	RNA5SP71	PLEKHJ1	RNF214	VN2R10P	AC024587.2	PATL2	AC127455.1	NPEPL1	AC007731.1
	RAP2CP1	CLNS1A	AC011753.4	ZBTB40-IT1	AC019181.1	MTIF2	IER5L	UQCC3	SGIP1	PCNX3	AL121760.1	AP003306.2	POU5F2	AC020763.4	Z70280.1	RPS21	SNRPE	PPP1R3B	AC005785.2	FARSB
	MAGED2	AC092117.1	AC020922.4	AC111170.1	AL445465.1	AL117190.1	AL031963.3	MTCO1P24	RNU6-35P	LINC01220	ZNF396	RNU4-39P	MTIF3	STX4	ABL2	AC021146.12	AC117386.2	LPAR5	SLC7A11	SLC18B1
	AC114801.3	TRGJP1	WIPI2	HLA-T	ADI1	SELENON	INTS6L	KCTD7	AC092279.1	AC020904.2	OCIAD1	CAMK2G	TCF7L1-IT1	MRPL27	GTF2H1	C6orf226	PICALM	PPP3CA	MKI67	MTCYBP43
	RNVU1-4	MIR573	TRMT11	CDA	GPR34	PTOV1	IL10RB-DT	TIRAP	AC003991.2	AC025627.2	NEMF	GAPDHP2	CEP55	RAP2B	AL021707.4	LMNB1-DT	AC073130.1	CDK18	SPANXB1	PPP1CC
	AC245014.3	TMEM165	AL078590.3	AC104964.4	MIR548AX	ZNF672	CXXC1	AL132656.2	RAVER1	AC025159.1	MIR302C	LINC00689	CDKN3	NPPA	ZNF850	C9orf16	TRIB2	POLR2J	AL034417.1	AC010469.1
	TICRR	CELSR3	LINC00476	SHC1	AC145124.1	AC100778.2	GSN-AS1	RNF150	CIB1	GTPBP3	UBE2M	SLC27A4	HBB	THOC7	DZIP3	ZNF408	AC244021.1	PTPRG	DGKD	HNRNPA1P49
	RPS20P14	AP003472.2	AL449212.1	AC079362.1	RCC2P6	SNORD115-45	COL6A2	MTSS1L	PIP5K1P1	HRASLS2	URB1-AS1	NMUR1	AC091132.5	AC079584.2	IL1RL2	TTC32	AP002784.2	AGAP11	PAFAH2	DCAF12L1
	AC000089.1	MEDAG	SPRY2	REPS2	AL360294.1	RNU7-13P	PDGFRB	AC123912.4	DAZAP2	L29074.1	AC136424.1	AC063977.2	RPL17	AC022173.1	CELF1	AL354751.1	LINC01119	AC007557.3	SENCR	PDLIM3
	PAK1IP1	AC034236.1	PLD5	LDLRAD3	AC015845.2	FAM66C	ZFP62	AC027279.2	F2RL1	AC244034.2	AL031659.1	AC016831.6	PRDM5	PSMD10P1	PHB	TUT7	HOXD-AS2	NCK2	AC108463.2	LINC01605
	LENG8-AS1	AC093864.1	COPE	MID2	TMEM99	C6orf120	COL5A3	NFIA-AS1	MINPP1	ADAMTS7P4	LHPP	AC007663.3	AC108734.3	PIGP	AZI2	SNORD9	AP001107.1	LRRC25	CHMP1A	AL162311.1
	RGL3	MCCC1-AS1	SEPHS1	HILPDA	RIN2	SYS1-DBNDD2	MYOC	NFIL3	LINC01484	AC069213.1	AC104771.1	SNORA60	KIF20B	AL355607.2	HBA1	ATP6V1D	XG	LAMTOR5-AS1	AC005261.1	SPDYE1
	AC010768.2	AL117348.1	AC016888.1	AC145343.1	RPL17P34	AL355922.1	AC104825.1	GRM1	RPL35AP4	TTC16	RNU6-128P	CNIH2	AC004223.4	KIF22	METTL26	LATS2	RANBP3L	LINC00304	MLKL	AC008406.3
	AL365181.3	C1QA	TCTEX1D4	AC138696.1	FOXN3	RGCC	RPS26P45	RPL12P9	AC011447.3	CNOT6	AC109309.1	ORC1	AC012417.1	AC092115.1	AC008649.2	AC010163.1	RN7SL87P	AL354718.1	USP16	AC019097.1
	ULBP2	LINC00520	UNC45A	AC010163.2	PPP1R13L	DUSP5P1	ANKRD26	RERG	RNU7-186P	CCDC13	AC000123.2	E2F3P1	CASP17P	C6orf223	ABCD1	PDLIM5	RNASE6	MTMR4	C3orf20	NAGA
	AC019193.2	SPATA31B1P	GRWD1	Z97634.1	SOD3	LINC01144	KIAA1614-AS1	AL928654.1	HDHD5-AS1	AC006111.2	LINC01447	OXT	SH3KBP1	RPL7AP3	KRT18P63	STAG3L5P-PVRIG2P-PILRB	FAM200A	AL136982.1	AC079193.2	AC112778.1
	ZBTB24	TESMIN	AL136301.1	ACTG1P24	AC127496.4	AC004825.2	YWHAB	AC104461.1	VAMP8	HHIPL1	TRIM28	AL365181.4	PDGFC	AP003108.4	AC044802.2	DPY19L1	BNC1	COLGALT2	ANKRD18EP	AC009163.6
	MFAP3L	DACT1	SYNE1-AS1	CDC23	AC138150.1	TRAV33	AP005131.2	A2M	TLE6	AC114490.1	TNRC6B	HNRNPA1P48	FOLR3	CDC42-IT1	SELPLG	FCRLB	LINC00494	AC005392.1	BBOX1	AC020911.1
	ANTXR2	S1PR5	LEF1	GYPE	UFSP1	AP002505.1	EIF4A1P10	TOMM20P2	EIF4EBP1	CHST15	AC113192.1	AC004552.1	AC008393.1	AC132938.5	MFSD2B	AC137932.3	RPSAP41	AL645933.1	UBE2J1	PYURF
	HNRNPUL2	SNHG17	KRT86	C11orf96	SCRG1	SRRM5	IFT27	U2AF1L5	GPAM	DDX50	AC055854.1	AC105020.6	AC017074.1	AC111182.1	NOLC1	TECPR2	TNFRSF11A	KLF3	AL049872.1	AL031775.1
	LINC01508	KMT2C	MIR27B	TBC1D1	TRIM73	DDX56	TMEM81	ITGA1	AP001024.1	ATP5PFP1	GPKOW	RPL21P88	SLC38A5	MTCO1P11	LMAN1	RICTOR	MFF	TNFRSF13C	FAM13C	BMS1P10
	RNF13	EGFL7	MOB1A	COPB2	CASKIN2	CKB	AP001043.1	GOLGA8K	AC069499.1	AL359273.1	ZFHX4	AC124067.4	AL133353.1	AC243562.2	AC006450.2	SCAMP4	HAO2	CYP26B1	PILRA	AP001094.2
	AC105942.1	TMEM184C	AC009090.5	TNS4	RUSC2	CACNA2D1	TMX4	IGSF5	LINC01772	SPSB2	OR2H2	AL591767.3	EFL1	MAGEE1	NXNL2	SNX2	RPL21P119	KDM7A-DT	IMPAD1	DNAJC3-DT
	SAA2	AC100757.2	ZNF888	AL357060.1	RPS2P46	SLC24A3	ZNF197-AS1	AP001646.3	AC015987.1	CAPN6	EGOT	AC008073.2	AL365475.1	DNAJC21	RPS7P8	AC006566.1	RASSF1-AS1	AC011767.1	DDR1	TMEM206
	ADORA2A	MIEF2	RUNDC1	OSBPL3	CARNMT1	B3GNT9
Avs.C	MEF2D	TMEM252	ADAMTS9-AS2	IGSF9B	RSBN1L	AC004637.1	PUM2	ROCK2	KANSL1L	ADAMTS9-AS1	PHC3	ITPR1	LIG3	LPP	ATL2	MPDU1	PCMTD1	TMEM245	ZCWPW2	LYPLAL1-DT
	SOS1	EPN2	AL139011.2	UBR1	DUSP19	MINDY2	ATP2B4	MPP7	MAP3K20	RN7SL262P	UBR3	SERTM2	PRDX3P1	ZNF852	RNF38	RAP2C-AS1	ESYT2	MICAL3	MRGPRD	LONRF2
	ASH1L	AC022034.3	KLHL11	MACF1	SLC8A1	PPP1R12A	EPC2	SVIL	DIXDC1	AL136979.1	ZNF891	KY	AF001548.1	PJA2	MKLN1	FEM1B	AL163636.2	SORBS1	NFKBIE	AC007114.2
	FBXL22	HIPK3	KANK1	AC109587.1	KMT2C	MBNL1-AS1	AP003548.1	AL161457.1	AC102945.2	USP3-AS1	AC012065.2	NCKAP1	B3GALNT2	PGD	CEP68	C15orf41	TP53TG5	LRRC37A17P	SLMAP	PPP1R12B
	AC108718.1	MIR4697HG	PCNP	RPAP1	AC100821.1	THAP5	PRKAB2	UBR5	PLEKHA3	LANCL1	BBS1	TACC2	AC011472.5	AC124312.2	AKAP1	AL356317.1	AC021106.1	CASC3	LRPPRC	AC021106.3
	MIR4506	PRUNE2	KCNMA1	STAT5B	PPIG	NPTN-IT1	AC010834.3	AC022893.1	AP000907.2	CACTIN-AS1	YTHDF3	AC068051.1	CDC73	CACNA1C	KIAA1143	FMO5	AP004609.1	SPDYE18	FAM227B	AC138393.3
	CALD1	CYBA	RPRD2	LIMD2	RTF1	AC099811.5	AC015845.2	RYR3	AC011472.1	AC244033.1	NT5DC3	AL354893.2	AC132219.2	COTL1	ROCK1	TSSK5P	RHBDD1	RIF1	COL4A6	INPP5A
	TCEA1P2	CYTH1	AC007000.2	AP001767.4	ANKAR	RIMS3	MYH11	AC022034.1	RO60	UBE2W	HNRNPLL	KLHL42	AC069213.2	GTF3C3	NECAP2	TNS1	PALM2-AKAP2	ITPR1-DT	AL161457.2	AC008731.1
	STK10	AC006064.3	ITGA8	KLHL23	TOR1AIP1	AC073130.2	THAP6	BAX	LMTK2	TCEAL3-AS1	AC104986.1	AC093503.3	APOE	SNORD116-24	RAB9B	SNX16	APOC1	ATP8B2	YWHAZP5	AL627402.1
	AC005358.2	AL731533.2	AC021785.1	SEPT10	EFCAB13	AC018752.1	RB1CC1	POT1	AC133552.4	AP003071.2	LIPI	MYOCD	AC060780.1	ZNF572	FYCO1	RNF216-IT1	SLC25A40	DENND4C	SPEG	HCLS1
	ADRA1A	MYLK	FBXO28	TACC1	CARF	ZC3H6	AL132642.1	AL512785.2	SLC51B	NT5C1B	MAP4K3	MAPKBP1	NCOR1	PDZRN3-AS1	NR2C2	AC026471.6	ATF2	MYO9A	CDKL1	AC108010.1
	ZNF148	UBE3A	AC007619.1	FGF13-AS1	PDLIM5	TAOK1	PGM5	TNRC6A	PGAP1	AL513217.1	CMTM7	AC124312.3	PREPL	FMNL1	GLYR1	FBXW11P1	DCAF17	PDE1C	ADAM22	ABCB10
	RN7SL417P	KIF5B	PHF12	KCNQ4	CCT6P1	LBR	ATL1	ADA	SCAPER	KANK2	AC242426.2	CSRP1	RPRD1A	LGALS9	AP002907.1	HMCN2	SH3BGRL	ZBTB10	AC243562.1	TSSK4
	SCRN3	NOS1AP	AHCYP2	AC073569.2	YIF1B	UBXN11	LINC01376	AL445931.1	GMFG	RNA5SP462	AC027306.1	AC000123.3	AC011247.2	ARMC1	MBNL1	MSRB3	PITRM1-AS1	PIK3C2A	TES	U62317.2
	DMD	SMAD4	AC053503.4	SLC25A12	PWAR5	RAB3D	SETMAR	ERVW-1	CDC42EP3	ZBTB26	ZNF658	MAGOH2P	ATP13A2	RFFL	ENTPD1-AS1	AGO2	PI15	ZNF471	C3orf70	YWHAE
	RABEP2	ALDH16A1	LNPEP	NBEA	NHSL2	RPTOR	WDR48	AC120498.1	SNORD116-4	AC083798.1	KCNK3	FAT3	SIN3A	AL132765.1	FOXN3	AC138932.1	RELT	NPTN	AC008770.3	CIAPIN1
	CARD16	HS1BP3	BRAF	CMTM3	SEC22C	KMT2E	BARD1	SLC38A7	VAMP8	KMT2A	RNF19A	LSP1	SPOP	EPHB1	MARF1	CICP14	TNRC18	NECTIN2	CORO1A	AC120498.3
	JPT1	SPANXA2-OT1	PCF11	ARRB2	AFF1	TMEM208	ZNF621	ZNF561	RAB4B	C8orf88	DSTN	LMOD1	STON1	FSCN1	CICP16	AP001324.3	SCML2P2	RPS23P1	PTGES3L	HDAC9
	DPY19L2P2	PALLD	CDK12	MEF2A	NOM1	MBD5	PIAS1	GPR161	TPM1-AS	AL121753.1	NECAB1	AC100823.1	SYNPO2	44262	ZNF623	ABI3	MAGI2	GPSM3	RHOQP3	CRBN
	EZH1	SETD1B	AC092042.1	YAP1	AC099811.4	GOSR1	GULOP	TSPAN2	TCEAL1	LDLRAP1	DYNC1I2	FAM168B	TMEM160	C5orf24	AC122129.1	PYCARD	AC099677.1	LDB3	CASQ1	RGS19
	EFHD2	AC138392.1	SLC20A2	VN1R108P	BMPR1A	SIRPA	CCDC158	TOMM70	RILP	BNIP2	SYNM	PDE5A	CBLL1	MPL	SYNC	LRIG1	RHOQP2	TNFRSF1B	ZNF337	TSHB
	TSPAN17	TXNRD1	AC107079.1	UBP1	AL590762.2	PLCB2	ZNF174	AP000866.1	THRB	AP001107.5	PLEKHM3	TRAF5	AC024075.1	TTBK2	AC117383.1	CCDC85C	VCL	GNA15	AP003059.1	ST3GAL5
	CORO7	AL133227.1	AC018638.8	OCRL	AC025043.1	BBX	VN1R1	NSRP1	VPS13B	AL139317.4	RNU4-82P	PAK3	AC087163.2	SNRPGP15	B3GALT6	SH3BGRL3	AC016708.1	NACC2	AC006971.1	CTSC
	AL355377.1	SPDYE19P	GIPC3	RASSF3	KLHL10	MEIS2	ZNF655	METTL24	MYBL1	GOLGA2P8	GATAD2B	FAM185BP	PPP1R9B	RCC2	ZNF280D	DYNC1I2P1	AGL	AC008105.3	SARM1	DCP1A
	MAP2K4P1	KCNH2	STAB1	LFNG	LINC01765	FBXO32	RASL12	LINC01797	CTNND1	TOR2A	GID4	AC102953.1	PSMB10	FUOM	AC007637.1	FAM13B	CALHM6	ZNF519	AL357075.1	PATJ
	KCND3	PCM1	ERV3-1	AL450263.1	KCNMB1	AC013403.2	ZNF717	PEX12	NCF4	KAT7	PTPN6	DEF6	TRIM23	AC083841.1	MKRN1	CAMSAP2	IRF8	ARHGAP45	AC015971.1	RNF32
	RAB3GAP2	MPDZ	AC243562.2	RPP14	ZNRF2P1	SNORD116-2	DCAF12L2	AC069213.3	ANKRD40	AP2S1	TANC1	IMPA1	TMC6	SPOPL	AC036108.2	AL139396.1	SNORA77	SH3TC1	HNRNPA3P9	AL365181.4
	NANOGNBP2	ILK	SYNE1	AC100774.1	AC008429.1	MEF2C-AS1	AC253536.3	CNN1	LINC01592	STXBP5L	AC005180.1	YWHAZP3	AL451164.2	SBSPON	MIPOL1	TLK2P2	CDKN1B	CPVL	AL049869.3	MRVI1
	FAM129A	NBEAL1	TXNDC12	ACP2	ZNF322P1	HIST2H2BD	AC010632.1	FAM192A	PDE4D	DTWD1	DERL2	RBM12B	DACT3	JPH2	KIAA0895	CHCHD1	BTBD8	RCOR3	SPECC1	AC131934.1
	ST14	FRY	RBM43	ADCY5	LINC01828	POLK	GPR135	ZNF37CP	PBX1	C2	AC018521.6	AC008507.2	ORC4	VPS13A	SMCR8	ANKS1B	DACT3-AS1	TRPM2	SYK	PKD1
	SLC1A5	NAGK	DMXL1	IARS2	AC091057.2	RALGAPA1	SBF2	PPP1R3C	ZNF10	DZIP3	CHST15	SLC9A3R2	RASSF4	HNRNPH1P1	CCDC6	RNF169	TNNI3K	TMEM56	SETBP1	PLXNA4
	ZHX1	GLYCTK	TMSB10	CNDP2	TRMT1L	NAV2	TEAD1	AC012651.1	EOGT	MXI1	FAM172A	FAM78A	CDC42BPA	PTBP2	FAM110A	NUMA1	WAS	STX17	CD300A	FAM53C
	RPE65	MFNG	AC107959.1	PLXNB3	LINC00528	SELPLG	ATOX1	UTP23	PDPK1	SUSD5	ARHGEF17	AL589765.7	AC055855.2	RBPMS	ARHGAP9	TPM1	AC011477.4	TLK1	CSK	BID
	OAF	INTS3	SLC47A1P2	RNASET2	ODF2L	USP37	WDR60	AC022272.1	CREBBP	COX4I2	FERMT3	AR	FNBP1	CHRDL2	GRIN2A	TMEM168	AKAP10	KAT6B	AC243654.3	PLA2G15
	ARIH1	AC092641.1	AC117489.1	DAAM1	MIR3164	BMPR1AP1	GDF9	TRIM6	FHOD1	COMMD9	PLIN4	AL583832.1	OPA1	MORN5	SERPINA1	ASB2	FERMT2	RBM41	LYPLA2	RBM24
	AC055874.1	SNHG14	AGTRAP	OXCT1-AS1	CCDC9B	AC145124.1	AP003059.2	TMEM37	ADAP1	FLNB-AS1	SEC24B	TSPAN33	AC139795.1	CNPY3	PKD1P6	H2AFX	AC091185.1	AIF1	ZBTB11	XK
	KLF8	UBN2	STRN3	CNOT4	MFSD14A	GMIP	DGKZ	IKBKE	ADCY2	METRNL	ADAP2	MAMDC2	CFL2	NPC1L1	DCAF10	MED11	CAPN7	STAM2	FAN1	KPTN
	ARHGEF1	PCSK7	FAAP100	TNFRSF4	PTCHD1	HYAL2	AC138207.5	COX6B1P4	EBP	LINC02613	GSTA7P	AP000802.1	DNAJC27	ZNF770	NADK2-AS1	IPP	CXCL16	CELF1	LINC01278	DTNA
	CREB1	USP34	TIMM22	SLF2	AC020634.1	AP000866.4	ZSCAN23	DUSP23	MAP1B	PPP1CB	EPHA4	OSTF1	COQ7	DNAJB14	IFT81	NFAM1	TMEM86A	MTR	TAF5L	PAWR
	NXPH3	AC234778.2	LINC01058	ARL4C	BOLA3-AS1	SPSB1	VN1R83P	HBP1	AC016705.2	SPI1	AL109955.1	BIRC6	SNORD116-1	ACAD11	FLNA	KLHL30-AS1	NCOA2	ZNF197	RGS7BP	LINC00624
	C4orf48	AGPAT5	COL4A5	IRF7	KLHL30	SP3	SON	MOB4	KCTD7	UGDH-AS1	DEFB131B	TLK2P1	KCNQ1	LMBR1	RNPC3	CD86	LINC01710	TPM3	ZNF287	GNAQP1
	U91328.1	FRMPD3	CD248	SLC47A1P1	CHST7	OIP5-AS1	AC096564.2	STAG1	ZNF548	RNF103	LINC02175	DGKG	SECISBP2L	AC004803.1	DCAF1	HCFC2	ACTA2-AS1	ORAI1	MITF	VPS13C
	KLHL12	URB1	ELOBP3	NANS	TYROBP	AL354893.1	ZNF382	HSD17B1P1	FAM181A-AS1	USP12	SPATA46	AC009065.2	PHOSPHO2	AC005180.2	ARPP19	LAPTM5	AL078645.2	RASAL3	AC083843.3	RALGAPA1P1
	FCER1G	PLCB4	RBBP6	SOCS5	MIEF2	CYTH4	AC115989.1	CIPC	TNKS	RNF166	NDUFS1	PCP4	AC073476.1	AC027514.2	EPM2AIP1	ZNF12	AC231657.2	AC012676.5	AL360091.1	AL391822.1
	ZNF425	DENND2D	UBE2J2	PTAR1	CHD6	TOM1L2	NOTCH2NLA	ZNF461	AC068888.2	ARL4AP4	TOB1	SPATA4	AC010636.1	CASP4	SMG1P3	BLOC1S2	OTUD7B	EHD4	BCL9	ZBTB38
	RNU6-882P	SDF2L1	AC123023.1	SMTN	GPRASP1	AC091906.1	MYO1F	NEMF	G3BP2	ZNF699	ASB16	PRKX	RPS10P7	LINC00663	SENP7	PPM1K	HSBP1	REEP1	SSU72	NIPSNAP2
	ZBTB41	LSM11	F11R	NDUFB4P10	DDX59	STK3	THY1	RABGAP1	EXOSC1	C14orf28	SLC35B1	FOXO3B	TRIM45	WFDC2	ST5	EPN1	AC117503.2	KALRN	PARM1	SASH3
	TNFAIP8L2	PIGCP1	VXN	AC104109.4	SMPD2	CCDC50	DAB2	DENND1C	SUCLG2-AS1	DPP8	VIRMA	ID2-AS1	GNA11	ALDH1B1	MIR378H	MRPS30-DT	PREX1	MIGA1	LY86	NFASC
	TYW3	ZNF333	AC036108.3	ZNF793	SLC10A5	NEXN	OXR1	SLC43A2	DUS2	SYPL1	TAX1BP3	RANBP2	PPP1R12A-AS1	AC011753.4	DBT	AEBP2	ZNF585A	AC009987.1	SMCHD1	SIGIRR
	CD14	KCNAB2	C2orf49	ITGB1BP2	SP4	LINC02078	MAPK10	GK5	RPS6KA1	FCGRT	LYRM7	CCDC167	KLF7	WDPCP	DDX18	FAM66D	DET1	RUNX1	AL139412.1	PPM1B
	CEP350	ZNF143	PPP4R3B	STAG3L2	AP000808.2	SRC	C4orf36	METTL15P1	CACNA1A	AC025165.1	SDAD1	C1orf162	METTL14-DT	LRCH3	IL32	NHS	AC016026.1	ZNF501	CCNT2	AL589674.1
	KLHL20	ZNF860	RIMKLBP2	STBD1	AF186996.3	FAM85B	AC018647.2	PTGER3	INTS4P2	AC012531.5	ALDH3A2	PDCD6IPP1	PXDC1	CTNNBIP1	LY6G5C	TTYH3	MARCKS	MRPL20-AS1	PDE3A	TMC8
	KRBA2	CC2D2A	GRIK5	ZNF791	TRIM16L	AP003472.1	TERF1	PYCARD-AS1	RAB20	ZNF774	AP001000.1	MFN1	TPR	CNST	BAK1	HCK	AC005730.2	NPL	STAC3	AC126755.1
	AURKAIP1	MS4A6A	SMG1	TMOD1	CCDC28B	UTP25	YWHAZP4	ADPGK	EIF4ENIF1	ANKRD50	RAD21	ANO6	EMSY	C1orf226	DOCK3	ZNF559-ZNF177	EIF4A2	ATRX	MAOB	KHK
	RBSN	C1QC	ERCC4	LINC00272	TENT4B	PRKAA2	AC138035.1	KANSL1	TMEM106B	RRN3	DHFR2	PPP1R3B	KATNB1	AQP3	LST1	FGF7P6	CAMK2G	C3orf18	DMAC2L	AL353807.4
	MAPK4	POU2F1	ATP6V0D1	NUP133	PLSCR2	AC007342.7	AC090844.2	TTC21B	KIFC3	AC012085.2	ZNF567	CEP44	AC087620.1	FASTKD2	SETD2	ZSCAN32	HTRA3	RNF150	TBXAS1	SCARF1
	PIK3R4	ITGB2	AL157932.1	AP005264.7	CCRL2	AC046185.3	PPARGC1A	AC073349.2	FCGR1A	ZSCAN21	TMEM9B	SCRG1	RSBN1	BTBD7	AC024075.3	NPC2	DPY19L1P1	C1QB	PHF20	AC007787.2
	LINC02339	LAIR1	TMEM68	ARHGAP27	ZFP28	CD4	RN7SKP74	HK3	TASOR	STAC	AC006330.1	AGBL5	C1QA	CACNA1C-AS1	SHPRH	ZFAND1	HERC2	SF3B1	ADHFE1	AL138724.1
	GNG12	OTUD6B-AS1	RASGEF1B	BIN2	KCTD15	TNIP1	AC100830.2	SPAG7	AFF4	GNRHR2	VAV1	AC004908.1	STAG2	AC090515.5	CAP2	TPPP3	LRRCC1	IL10RB	DOK2	CSTA
	CREBRF	MTRNR2L4	AC026407.1	AIDA	RASSF8	CD72	TUG1	NPAS4	GOLGA8M	ZNF568	DOK3	POLR3GP1	RN7SL526P	SSH3	AC013439.1	E2F4	FNBP1P1	AC111182.1	SERPINF1	RNASEH1
	VPS37A	EGLN1	MIR1302-8	AC008764.2	STAC2	LIMS2	CPNE3	AC104463.1	ZNF585B	AC099811.1	RNA5SP139	ZNF573	LINC01841	LILRB4	PARVG	ERI3-IT1	ZNF502	AC018638.4	THEMIS2	PARGP1
	MED1	CWC22	ABRACL	PEX1	CPEB4	AC108866.1	C22orf39	EXOC3L1	GZMB	AL160412.1	NHLRC2	AC078795.1	AC009812.3	ULK2	IL10RA	PUSL1	EP300	PLEKHM2	COLCA2	TBL1X
	USP19	AC012531.4	FGF7P8	TP53BP1	CD53	INPP5D	AC005586.2	CACNA1H	HLA-E	LCP2	TAPBP	AC008115.3	AC090114.3	METTL14	WDR44	CARD8-AS1	PKN2	CARMN	HMGN2P19	AC005034.5
	AP002490.1	AC040162.1	BX119917.1	RN7SL138P	CPTP	HAND2-AS1	AC024940.1	PRKD1	AC069213.1	CKMT2	RNASEK	NF1	RAD21-AS1	CCL3	STAG3L3	IL27RA	THAP1	Z82173.1	CSF1R	ZNF384
	PFKP	AC005562.1	MSL3	SEMA5A-AS1	CYCSP10	AC011451.2	LINC01798	S100A9	AP002373.2	PTAFR	LRP12	SDF4	FPR1	DPEP2	MICU3	IFI27	PCNX1	AC020951.1	AC008537.2	FBXO11
	ZNF451-AS1	ATAD3A	PIK3R5	AC026471.1	MIR186	TNRC6C-AS1	AC000120.1	AL590762.1	NECTIN3	PARK7	HAVCR2	CYB561D2	TADA1	PCED1B-AS1	AC108215.1	PSTPIP1	APOBR	AC245100.8	KRIT1	AP002748.2
	ZNF337-AS1	PRAG1	ZNF407	ZNF529	EIF5A	AL157871.5	TK1	SETP2	NAF1	INTS2	CUL4B	RF02271	CFD	KDM3B	UBALD2	TTC3P1	CLDND1	AC025180.1	UCP2	AC021483.1
	ATP2A2	BMPR2	HLA-A	TAF2	CSF2RA	MOG	CEP97	ARHGAP30	ZNF658B	PTGES3L-AARSD1	AL359710.1	MROH5	UBE3C	MTMR11	PLN	LAT2	AC093849.1	DDTP1	NCF1C	CPED1
	ASS1P2	ZNF181	SH3BP1	AC005274.1	SNRPC	ZFP62	AC009299.2	MTMR9	AC092999.1	PPA1	LINC02625	OPTC	AC025627.1	TCF23	TAS2R3	ARHGAP4	SIGLEC1	AC053513.1	SFXN5	SUCLG2P2
	YWHAZP2	AC015727.1	ARID4B	PPP4C	NKTR	ARHGAP5	VMO1	PIFO	CD46	FGR	FAM13C	CAND2	HOMER3	AL135791.1	INO80	AC024267.3	WDR81	MRGPRF-AS1	HMGN1P24	CD37
	MTMR8	RAB3GAP1	ARRDC1	RFX7	C1QBP	CCL4	RNASE1	SEMA4B	CLEC2B	APBB1IP	SRM	AC091959.3	CCSER2	LINC00570	CETP	ZSCAN29	LINC00843	FAM20A	B3GNT10	ZNF397
	AC106881.1	BCOR	MIR139	POLI	BATF	ARPC1B	RPL7P13	ATP9A	AC131212.2	BDP1	OR5BK1P	DPF2	ARID4A	ACE	TNFSF10	AC004691.2	AC024267.5	ZNF429	CTDNEP1	AP003721.4
	SINHCAF	MXRA8	MID2	ZNF490	MYO15A	CCL4L2	PGM5-AS1	ACTG2	AC079203.1	TRRAP	ISOC2	PCDH12	PRKAA1	MIR1-1HG-AS1	ZNF304	LINC00910	RAB11FIP2	Z69733.1	EBLN2	GIMAP1
	KDM3A	AC025917.1	WDR35	FGD3	AP001001.1	HLA-B	AC008080.3	DTNBP1	TAS2R6P	DNAJC24	TSPAN14	MS4A4A	FRMD6	AK4P1	CRYZ	EPM2A	EFR3A	ARL11	FOLR2	RAB30
	AC079781.2	AC073210.1	PIK3CA	RNASE6	MAPT	NCS1	LRRC58	DBNDD2	SLC41A1	TXNDC17	HLA-DMB	AC138393.1	AC013553.3	PHYHIP	AL445483.1	FGF7P3	NCR3LG1	LRRC25	ZNF292	INPP5K
	ASCL2	CAPZA2	PRSS36	TLN1	ACVR1	PI4K2A	NCF1	KIAA1109	PSMB6	RBM12B-AS1	MED13L	MIR5590	SEPT14P4	HLA-C	AP000892.3	NSUN3	PNP	SVIL2P	AL021407.1	SOWAHC
	TC2N	AC068152.1	PSD4	FAM219B	POLD3	GFM1	VSIG4	PTPRF	AC114763.1	DNAJC13	ST3GAL1	STEAP3-AS1	GAS6-DT	TAF6	AC008269.1	UBQLN4P1	AC009065.5	AC015871.3	ATP8B3	INO80D
	LILRB2	RAD54L2	C2orf15	GSN-AS1	C22orf23	UBXN2B	ARHGEF26	AC090114.2	SYNE1-AS1	ZNF236	JDP2	RBBP5	ZNF483	MANBAL	BCL9L	NFATC2	AC099336.1	SNX13	ARMC8P1	SIGLEC9
	ZNF142	MIIP	DOLPP1	LENG1	BAZ2B	ACADSB	NFYC-AS1	AC011767.1	AC010336.2	COL4A2-AS1	SH2D3C	FHL1	CDKN2AIP	HLA-DMA	TSPAN4	AC107871.2	NPAT	SNRK-AS1	AOAH	AC025430.1
	STX4	CLIC4	MTND1P8	AL606489.1	SLC47A1	LINC01018	RIMKLB	COX20	MYNN	AC087752.2	AC011481.1	AC005329.3	GOLM1	LIX1L	ZNF644	HEATR3	SPIRE1	KRT8P47	ELAVL3	DCUN1D4
	IL10RB-DT	AGAP11	AC012618.3	ICE2	MMGT1	DNM1P51	SLC25A36P1	SPAG1	UNKL	AC016722.2	AC104532.2	HOOK3	USF3	AC016590.2	AL031429.2	RNF216	SLC2A13	ZKSCAN8	RBM5-AS1	AC090198.1
	SLC4A7	PRPF40B	TMF1	CLOCK	ZBTB40	SLC2A3P2	CLASP1	COLCA1	AL162311.3	AMN1	AC087752.3	MAD2L2	FLG	TPPP	CUL1	BAZ1B	DCAF6	ARHGAP18	AC079848.1	MAGI1
	PTMAP11	AL359878.1	RPL36AP43	CD180	NCAM1-AS1	HOTAIR	KLHL24	CYBB	GPR75	ATAD2	CASP10	AC093484.2	PFN1P6	FNIP1	C3orf49	IGSF6	TMEM150B	AC098617.1	CASQ2	AL353593.2
	GNLY	CLDN12	TMEM47	GALK1	DSTYK	RNA5SP203	ASPH	HSD17B6	SOWAHD	VEZF1	PDGFB	COX10	AP001931.1	IL1RN	PURA	PLAUR	SAT1	NMD3P1	AC090739.1	EBI3
	PRKDC	MIR548N	RBM47	PDZRN3	MIR4696	IFI30	NEU1	HCST	RIC8B	AC027544.2	SPIN1	MRPL35P2	CYB561	FRMD6-AS2	SLC25A10	MYADM	ZNF25	HIPK1	LINC00670	HS6ST1
	AC022893.3	PTGES	RHBDF2	PAXIP1-AS2	NKG7	PAPSS2	FCHO1	AC011472.4	ZSCAN20	AP000253.1	RBFOX3	RAC2	AQR	MYRIP	CDH3	MMP2	SLFNL1-AS1	GIMAP4	C12orf54	IL12RB1
	AP000766.1	TYMP	RIMKLBP1	DBI	CTSH	CD300C	SUPT6H	RNF149	STON2	NFIC	AC136604.2	PHF3	AL590764.1	CYB5RL	GNAZ	LASP1	SMC2-AS1	RNA5SP18	AC239868.1	PRLR
	TLNRD1	MIR331	KPNA1	HLA-H	CYP2S1	FNDC10	AC113208.2	AC092634.4	ZDHHC23	HEATR5B	CRYBG3	CRYBB1	TRIM33	TMED9	TECPR2	CCP110	PDSS1P1	AC147651.4	DIDO1	ZNF532
	ENAM	ZNF619	ZNF654	TCEA1	KCTD9	RNU4-47P	RN7SKP150	ITSN2	FAM185A	AL513122.2	AC002064.2	ZNF233	CLIP1	MILR1	REV1	AL357568.1	ZNF614	FAM131A	RERG-IT1	GSK3B
	PPM1L	CCDC85A	PTP4A1	TTLL7	DLG5	AC092111.2	AP001619.1	AL359510.2	CASD1	TNFAIP8L1	RABGGTA	LINC01460	S1PR4	AC022182.2	SOGA1	WAC	AL139300.2	MFAP2	ABCD4	CHIC2
	SRPRB	RF00264	ANGEL2	DTX2P1-UPK3BP1-PMS2P11	CBL	CICP20	AC096920.1	AC015849.3	PRR26	ZC3H12B	PCA3	ERC1	ZNF829	L3MBTL1	BCHE	ALCAM	SPG11	ARMCX4	NLRC4	SNAPC3
	CTSS	PCED1A	MLKL	CDS2	ITGAE	ICAM2	AC016876.2	SEC14L1P1	CSF3R	MYO7A	TAP2	AC008915.2	TSTD2	SLFN13	ASXL2	SPATA2L	AC067750.1	RNF115	ZFX	MGA
	CASP17P	PCOLCE	STAU2	CD68	LILRB1	PQLC2	RIPK3	PIK3R6	GNGT2	ALKBH3-AS1	AL162171.2	AC040970.1	AC106786.2	PITPNA	KLHL6	BRIP1	GPRASP2	HEATR1	ZNF790	GPD1L
	BCDIN3D-AS1	MOAP1	B3GALT5	AC127496.7	FOXP3	TTC30A	SNX20	LINC01126	IDH2-DT	ARRB1	AC131009.4	SIGLEC7	AC022558.1	MIR3149	SLCO2B1	GNG2	BTAF1	ATF6	SLC24A3	PEX13
	GON4L	TOM1	AP000654.1	VPS50	ARMCX5-GPRASP2	RBFOX2	AC008737.1	ZNF445	AP001350.1	CPSF7	AC005632.2	MTCO1P28	TNFSF9	SLC25A11	ASGR1	GABARAP	AC087457.1	LRMDA	ACVR2B-AS1	AC120114.1
	RCC1	CKLF	MIER1	CUL5	AC091132.5	RRS1-AS1	PILRA	ATL3	LEMD2	AC006333.2	ARFGEF1	AKR7A2P1	TGFB1I1	VCPIP1	NFAT5	AC010618.1	FOXK1	CRTC3	PBXIP1	HNRNPA1P14
	SEPT10P1	AL359922.2	PCDH7	SGIP1	DCAF12L1	ANO5	RNU7-13P	ZNF99	ZNF493	ZNF609	PRKAG2	UXT	AC233300.1	KRT18P7	CHN1	TUB	AC094019.1	AL049840.1	CASP1	MRPL27
	TMEM206	LRRC7	MYO1G	ARID2	OTUD6B	AC012414.5	MTHFD2P3	ADAMTS14	RNU12-2P	ZNF136	SCAI	MRPL14	DMPK	AL133243.2	SH3KBP1	LNPK	RPL7P3	AKAP6	IQGAP1	PTGIR
	ZMYND15	AC067817.2	GPR137B	AC090825.1	TRIM46	SCAND1	AL355377.2	ZNF550	CSF1	AC067942.2	ZNF252P	AC007848.2	MTUS2	PDCD7	AC010203.1	PDE8B	LINC02094	PM20D2	KIAA1958	SBNO1
	MIR3657	ZNF558	GPR85	ZBTB37	CARD9	WDR13	OSBPL10	SMG7-AS1	TCAF1P1	FUBP3	WDR47	LMO2	CRYZL1	HM13-AS1	ACSM1	SDE2	AC020658.5	PURB	ZNF615	NUDT3
	AC096677.1	RPS6KC1	LYNX1	AC012368.1	HMGN5	TMIGD2	SAMSN1	PHKG1	AC068446.1	ZNF37BP	RYK	AC084880.4	AC005358.1	CIB4	AC027307.3	GEMIN7	ATP11C	ZFR	AC005920.4	AC015911.7
	TNRC6B	AC093752.3	RRP36	RNF8	DDR2	RNU6-282P	CAMSAP1	KLHL13	SCO2	CSNK2B	AC099681.1	SNX8	LPAR6	LINC01138	TTC28	SHPK	P2RY8	AC103739.2	AP002990.1	NPNT
	SHROOM3	KMO	SOCS2	DCXR	SYT11	TLR2	DTNB	AGMAT	GAS1RR	DES	AC080162.1	AC116456.1	SAT2	AL391422.4	SRA1	TP53I3	AC073107.2	ARPC5L	ARHGDIA	AC084082.1
	MTDH	TNFRSF18	SCAND2P	HDDC3	AC090115.1	MPP3	ECSCR	CHD2	PPM1A	LTN1	RNF112	MLLT10	SSSCA1-AS1	DHX36	P2RX1	AC036108.1	PIK3AP1	KIF17	COL5A3	CARD11
	GUSBP2	RASGRP2	AC127540.1	CASZ1	TMEM56-RWDD3	ABCG1	MYOC	AC067852.3	ATP6V0B	BTK	AHNAK2	ZFHX3	ABI2	PDPN	SRRM2	FAM126B	AL161785.1	ATP8B1	ATE1	HSPE1P5
	PTPN2	CCDC81	RNU6-1291P	SATB2-AS1	AC036103.1	FCGR3A	ZNF700	LINC01079	ATP8B4	AC106820.5	IDH3A	SMPDL3A	AC093495.1	AC011462.1	ZNF551	ZNRD1	AC005154.4	TCP11L2	DIP2C	CISTR
	VLDLR	MRPL49	AC064871.1	SP140	AC069224.1	AC009487.2	PEX11A	UBE3B	AC011815.3	AC008554.1	CLASP2	AC109361.2	AC074138.1	CHIC1	RPS6KA5	RNU6ATAC24P	LGMN	ADAMTS6	ANKRD36	ZNF286B
	RNU6-593P	IL2RA	ATXN7	CD163	LINC02005	AC138150.1	RAB40A	NEK4	CNFN	ZNF250	RICTOR	TEAD3	ANAPC1	AHCTF1	GNAQ	RPL18AP7	AKT3	AC073130.3	HIC1	AC006030.1
	AMOTL1	PBRM1	NCF1B	TMIE	OR52V1P	GOLGA8CP	LIMK1	NLRP3	ARHGAP44	SGSM1	THUMPD1	C15orf62	TIMM10B	FKBPL	SLC38A1	PRR5	PRPS1P2	CLEC4A	ZCCHC2	AC068888.1
	RCN3	CSF2RB	CCND3	AL450332.1	C2orf40	GNAO1	AC087164.2	KATNAL1	AL353748.2	HOXC13	EIF1B-AS1	FBXL7	ITGB3	ZDHHC24	SLC29A3	BDKRB2	KIAA0930	AC108134.3	ABCC9	SH3BP2
	KIDINS220	AC124242.1	AC023855.1	RNU6-1016P	ZRANB2	RNU6-652P	U62317.1	HMOX1	ZNF346-IT1	FAM184A	CHM	OR13J1	ZNF507	APPL1	MFSD5	JAML	IL17B	IL21R	SIRPB2	C1orf159
	NEK7	CACNB2	ANKRA2	CTNS	MTMR6	ARTN	ZNF626	IMPAD1	TFPT	Z73965.1	PLEKHG3	AC069222.1	PPDPFL	MRPL20	IGFBPL1	NXPE3	FILIP1L	AC135050.5	RGCC	CD27-AS1
	SCAMP2	AC010280.3	DOCK8	MRPL17	IL2RG	MUS81	NALT1	FAM50A	EHBP1	SLC39A7	GPX1	TIAM1	LAMA3	HMGB1P39	RC3H1	PRKD2	AF131215.5	TMEM229B	MAN1A2	AC108704.2
	U52111.1	GPATCH2L	HCFC1	IRF3	OCLM	CST7	LARGE1	AP1AR	LINC01615	HMGB3	PHF2	FBXO30	PGR	AKAP11	AC004982.2	TDGF1P7	C9orf139	ALKBH5	GGNBP2	GJA4
	TTC32	CBX7	IL18	APOL4	AL133373.2	AC008267.2	AC138649.4	PQLC1	CDC42EP3P1	ADAMTS2	CFAP97	OSCAR	BTN3A2	AC006159.1	NPR2	DIRAS1	HACD2	GZMM	SRGN	DYRK1A
	PSME2	NBR1	DIPK2A	SEPT6	SSR4	AC118344.1	DNM1L	LINC02373	NOSIP	ALDH6A1	SIGLEC14	LINC01619	PIAS3	CERKL	AC090124.1	AC018645.2	AC009549.1	ZBTB20-AS4	LINC00578	RHOT1
	MIER3	HLX-AS1	FAM86B3P	FGF13	AP002026.1	LINC02348	RAPGEF5	RNU6-1048P	RBM33	CEP295	C3AR1	AF001548.3	CD81-AS1	PLAC9	SEMA4C	SPDYE5	LRRC49	AKR1B1	HECTD4	MIR4312
	KIZ-AS1	SLAMF8	IMMP2L	CCDC197	GTF2I	RASGRP3	ACSL5	CCL3L1	PRRT2	FO393401.1	GPR4	ZMYND11	NADK	FJX1	AC139769.1	AC005498.2	AC125611.4	SYNJ2BP	AGO4	AC020907.5
	APRT	UBXN7	AC016866.1	STK38L	DGKQ	HMGN1	GOLGA8R	MED21	AC015819.1	SELL	HLA-DPB1	PRSS27	TCEAL4	DGKI	AC118754.1	AC022217.3	SLA	CU633906.2	ATN1	MYBL2
	LINC01750	B3GAT3	RELCH	INO80C	RUSC2	ADGRL3	SOCS2-AS1	LRRC37A4P	TGS1	THAP3	TAF8	SNAP25	DCUN1D1	TMEM43	VN1R107P	PTPN11	MTFR1	FBXW11	RPL5P30	LTB
	AL590428.1	CHML	AP003486.1	FMR1-AS1	PPP1CA	GGT5	MTCYBP21	ZHX2	EMC8	FAM8A1	CENPS	PLD3	CD33	AC243562.3	AC004687.1	FAM13A	AC245884.3	NUDT5	MCUB	AF186192.2
	ZMYM5	MORC3	TIMM23B	UNC93B1	AC108463.2	C8orf37	SAP130	RBM14-RBM4	AL008719.1	C1orf61	RF00072	RASGRP4	U2SURP	BICRAL	AASS	PSMD6-AS2	HNRNPA1P49	EN1	AC083843.2	C5AR1
	AC025040.1	IMPACT	ALMS1	CSNK2A2	JMY	AL133342.1	MYDGF	LONRF1	CPNE2	AFTPH	AC013356.2	XIRP2-AS1	PLBD1	CEBPB-AS1	GPR132	KHDC4	CLSTN3	RSF1	TAF1	FOXJ2
	FUCA2	THEGL	BX284668.5	AL450384.1	AC080023.1	XPO7	AC093484.1	AL133367.1	HLA-DRB6	LINC01770	AP1B1	RHEBP1	HTR1B	ZNRF2P2	AC010969.2	REEP3	AC092718.4	LINC00630	AC242842.1	LINC01811
	PTPRG-AS1	AC003002.2	TESC	RASD2	AD000864.1	AC108463.1	RN7SL73P	SCMH1	ATP5IF1	TMEM131	RASD1	AC234775.3	PTPN7	MIR4435-2HG	VPS4B	RASL11A	SIGLEC10	IL2RB	USP7	AC021231.3
	DUSP3	UBA3	EID1	EGFL7	PLVAP	GNB5	NUP93	MUC1	AL627171.1	MIR421	EPSTI1	FUCA1	APOOL	ZFP91	AL161756.2	CD40	KCNA4	PDE12	TMEM53	ADH5P4
	AL357075.2	ARMC6	PTPN14	ARPC3	EVI2B	ITCH	L2HGDH	STARD3	CASKIN2	HLA-DOB	S100A4	MYOM1	AD000864.2	SPARCL1	AC093732.2	FAM89A	PLA2G10	HS1BP3-IT1	TMEM220-AS1	AMER1
	PLA2G2A	APEX2	TPST2	MRI1	NINJ1	MED14OS	AL162426.1	CCDC144NL-AS1	AL359183.1	ZNF24	AC132812.1	AL590617.2	AC064801.2	THRA	CCL8	MECP2	KCTD3	AC004492.1	CH25H	AC144548.1
	DOCK2	JAK3	JRK	SLC25A36	AC012645.3	AC104758.3	ZBTB16	PIGM	AL023653.1	DNAH11	AJ009632.2	AL031587.5	GPR3	AC060780.2	ANKRD31	AC027449.1	AL139220.1	GEMIN5	PIP4P2	DEGS1
	AL022328.1	SINHCAFP2	TAGLN	AP003419.2	CCDC121	ITGAM	ORC2	RBX1	OSBP	AC009120.3	ZNF91	CD28	ANXA2	SPON2	RHOG	MIR4786	TMEM200B	RN7SL75P	AC127537.1	NAA30
	WFIKKN2	TNFSF13B	PTK2	AC104123.1	RN7SL784P	CLMP	UPF2	ENG	GTF2IP23	LRTOMT	TRDC	TSGA10	MIR3941	BEND3P3	OR5K2	RNU6-137P	SHKBP1	CLPX	AP001266.2	TRPV4
	ICE1	RINL	SEC61B	CHERP	PLCG2	AC124312.4	FAM66E	ANKRD26P4	CTTNBP2	AC079210.1	SESTD1	SEMA6B	YY1AP1	AL158847.1	DPY19L2P3	MAU2	OR7E7P	EPPK1	TRIAP1	KLHDC9
	CACNA2D1	AC138956.2	MPEG1	ZSCAN25	ITGAL	B4GALT7	RN7SL861P	ABRAXAS1	CRYZP1	AL132989.1	AC126773.2	VPS36	CFAP20	ZNF33A	UBE2V2	WDR73	ZRANB2-AS1	ALPL	COX16	ANKRD36C
	IRF1	PUS10	RN7SKP179	P3H1	SOX18	RNF180	ROPN1B	RBMXL1	BECN1	LILRB3	CCT6P3	AC117383.2	TMCO1-AS1	HIGD1B	RF00139	CD7	CEBPZ	GOLGB1	CTDSPL2	IFNGR2
	AUP1	YIPF4	RPL28	NDUFA5P4	SCO1	LINC00607	CD3D	LRRC2	GPATCH3	SESN2	LYPD3	ASAP3	C6orf132	PLTP	PWWP2A	AC091152.4	HDX	MYH7B	SENP8	AL021368.2
	SLC35A2	MIR4633	TNFAIP6	AC016727.1	TESMIN	WDR46	ABCC6P2	CCDC189	ZBTB47	CICP9	SOCS3	FAM20B	PPP2R5A	DNAJA3	MVD	MEFV	C7orf43	CGGBP1	HLA-DRB5	IL4I1
	FGD2	C11orf42	DOP1A	ELF2	ID4	TOR4A	AL445435.1	CTSD	MAML3	GLRX	ARPIN	EMC6	CMC2	MTA3	KLHDC3	LYN	C3	AL391988.1	CPXM1	AC006504.4
	SUN1	ALG5	AC103810.3	PARD6B	AC018832.1	CLIC1	CCNT1	CXCR4	ZNF140	MPP2	AC007743.1	FILIP1	HSPB3	ADGRG4	LINC00844	AC026894.1	EPHB2	AC022400.1	RRBP1	ZNF639
	RNU6-888P	HSPB7	CD200R1	SATB2	AC013553.4	DCAF8	TMEM273	TXN2	ANO1	CNOT7	ACTA2	SETD5	TNFRSF9	MSANTD4	CCR1	ITGB2-AS1	AL031663.3	PIN4	ZMYND8	PPP1R14A
	LINC01426	LMO1	GPR17	NGRN	MTFP1	CCDC152	COBLL1	ARL8B	TREM2	NBDY	ADCY9	AC022150.4	PSMB8	AP003071.3	PRKCI	GRASP	AC060780.3	VAMP5	LINC00933	COPE
	EPN2-AS1	TRPC4	OGA	PTTG2	RDH5	AP001469.2	HERPUD1	SNORD116-14	VPS39	DPM2	PRF1	DCTPP1	CREB3L1	XPC	HLA-F	AC009102.2	ZMYM1	C2orf16	ARID5B	SLC35A3
	MTG1	PRPS2	AC005162.2	ZAP70	KIAA2013	KPNA4	ATXN2	REX1BD	RNU6-878P	AL158163.1	API5	AC242376.2	FKBP11	MFSD13B	KIAA1614	NDUFB11	VIPR2	FRY-AS1	SF1	METTL7B
	ARHGEF19	AL121772.3	KLF12	CD247	THOC2	PAXIP1	GXYLT1P3	PDGFRA	NFATC2IP	RBAK	HLA-L	CD300LF	ZNF420	FYN	LUC7L2	MAGI3	RER1	AC231759.1	AC007495.1	AC073476.3
	CLEC7A	PPP1R2	AC022364.1	AL159163.1	DCX	AC091849.1	AC023830.1	KIAA2026	ZNF441	LIF	FRAT1	PTCD2	YIPF6	KLF15	MPZL3	AUNIP	AC139530.1	HERC1	SNAI3	BAG2
	ITPA	ZNF248	SPDYE2	KLHDC2	MMP15	ZNF385A	AC074135.1	NCF2	APOC1P1	AC026271.3	FAM122A	ZNF782	NBPF22P	AC072022.1	DENND6A	ETAA1	MEIS1	SOCS1	GKAP1	FGFR2
	KCTD18	LPAR5	PPAN-P2RY11	USP30-AS1	ICA1	AL031846.2	RTN4IP1	SSBP2	KIF5C	RNU6-1136P	VWA3B	LRRIQ3	MANEA-DT	OLA1P1	SUMO2P15	GPATCH8	WDR17	HOXC11	FBXL20	ETV7
	METAP1	RGS22	AC123768.3	AC108449.2	RSPH3	HECTD2	TRBV28	PSMB8-AS1	TRADD	AL136090.1	EP400	COX11	LINC00702	DUBR	RAB23	CD80	AC006483.2	AL359962.2	XPO1	TAS2R5
	DST	SORCS3	HLA-DRB1	PRDM5	CCM2	RNA5SP317	AL157823.2	AC073957.3	AC245100.7	INKA2-AS1	CD8B	DNAJB6	ENTPD1	HOMER3-AS1	AC007683.2	HOXC12	PPP2R3A	THUMPD3	TSBP1-AS1	DMTN
	BNIP3P15	POGK	BCL2A1	FGD5-AS1	NRROS	SNRNP200	LINC02035	GTF2IP14	SERPINB1	CLIP1-AS1	COPS2	AC096564.1	PRICKLE2	PRR29	ALG13-AS1	ARHGEF25	STAT4	AL445187.1	AC005224.1	MAP3K2
	AF131215.7	AC020910.5	AC080038.1	ZNF383	SPAG9	AC026254.2	GPR65	PHC1	ZKSCAN1	RPL23P2	AL357052.1	TNFRSF25	USP22	MLLT6	EVI2A	RGS1	MPV17L	SLC36A1	AC007191.1	MS4A7
	AC010136.1	ZFP30	AL359397.1	DPP3	MCPH1	RAVER1	BRD3	IGFLR1	PRKRA	GRN	CD9	PGM5P2	DDX6	BTC	FAM133B	RAB11FIP1P1	TMEM9B-AS1	TNF	INTU	ATF5
	AC087164.1	ZFYVE21	CXCR3	TMEM256	DMTF1	AOC4P	CMKLR1	FCGR1B	TSPOAP1-AS1	TSC22D1	TAF12	SNORD116-26	ZNF559	SHISAL2A	TP53INP2	RAD50	ZNF426	NAPSB	SLC8B1	AC021231.2
	PRKG1	ARFGEF2	SUPT20HL2	B3GAT2	AKR1A1	AC006487.2	MX2	SLC25A33	TRBC2	LOH12CR2	AC002059.1	RERG	TSNAX	STK19	AC138474.1	LINC02310	AC008894.3	AL359885.1	AC104447.1	GPLD1
	BLOC1S6	ANO9	CCDC88B	RPL10P7	LAMA5	RDX	ICA1L	AC084018.2	SSTR1	PSMG3	ACP5	ZEB1	AP003392.1	AL357079.1	AC009220.2	CYP51A1	CYTOR	MPP1	CEACAM21	MXRA5
	RIOK3	ZNF627	ZNF687	ATP6AP1	AC004982.1	MIB1	FAXDC2	KLF16	GTPBP10	KBTBD4	GANC	AC009690.1	OXLD1	MIA3	ANKRD34A	RIMS2	DLEU1	ZBED3	GLA	BSN
	CHMP3	AL590762.4	AL132765.2	KLHDC7B	PHIP	SBDS	MRM3	ZC3H7A	IRS1	MSL1	RNU6-1157P	SULF1	AC092811.1	ZNF562	ACTBP9	ATG14	AL354733.3	FAM98B	NUP35	ZC3H13
	HOPX	ZNF727	SLC37A2	SNHG15	AC138207.4	ZNF638	CLIC3	CD163L1	FLII	FLI1	AC116347.1	BTBD18	GJC1	LINC00928	TMEM35A	AC005899.2	BOD1L1	TEX44	AC104794.2	TMPRSS13
	RN7SL68P	FLNC	ITGA1	PLS3-AS1	GALNT6	AGO3	TMEM233	CYBC1	SBDSP1	DCBLD1	SMARCB1	MEDAG	C9orf135	BOLA2B	SERTAD1	AL139220.2	CD52	AL034397.3	MPHOSPH8	MARCKSL1
	CD74	ZBED6	AC012313.10	ZC3H12C	BLOC1S4	MTND6P21	CALCOCO1	AL449212.1	AF127936.1	HEATR6	SPN	AC113191.1	WDR7	AC007403.1	ARRDC5	LIPC	MPRIP	C22orf34	SGTB	GZMA
	TAF11	AC012146.1	HDAC10	HAPLN2	EIF1B	SRSF9	RELB	PRSS42	RNU6-1086P	PIK3CD	AC013565.1	AC021483.2	CYP2U1	CERS6	FBP1	AC073343.2	GNA14	CCDC96	SIL1	CRTAP
	ERVK13-1	AC084337.1	TOP2B	LRRC4	RNU6-301P	GPR79	RAD9B	GABPB2	NUDT1	TTC14	AC087241.2	S100A13	ZRANB3	AOC3	RMND5A	PLSCR3	FYB1	WDFY4	AC016737.2	AC004975.1
	MYORG	ACTN1	MSL2	ZNF711	RUNDC1	GPALPP1	DNAJC3-DT	SLC25A4	RN7SL605P	SENP3	MAP2K4	PHC1P1	ZNF134	ASB8	ENDOD1	TFDP2	PRPSAP2	YIPF1	STK32C	KCNJ5
	CSPP1	LAGE3	NR2F2	LMBRD2	AC015909.5	ARFRP1	GPR84	FCGR1CP	AGBL3	AP001347.1	RN7SKP43	LYL1	ZNF239	LCK	ITGAX	VOPP1	AP000560.1	KAT6A	ZBTB6	AC008569.2
	SEPT7-AS1	AC005674.2	DGKH	CXorf65	AC090186.1	ZNF281	Z82206.1	WDR31	CD209	SPTBN5	ELMO1	FAM66C	AL021997.2	TMX2P1	WDFY3	A2M-AS1	FXYD5	TNIP2	ARHGAP31-AS1	MRPL12
	CASP5	HLA-G	MIR1289-1	CCDC66	SKAP1	GPS2	AL354824.1	CD70	AP000753.2	WDR88	EPHX2	ANKRD12	AC004156.1	NOVA2	IL10	DHX40P1	MAN1B1	SLC26A10	LILRA6	ANPEP
	ITGB1	MCHR1	SLC25A19	HADH	LRRC8D	LINC01690	LINC01150	MDM4	AL353763.1	SPDYE7P	SLC1A3	MTSS1L	AC007786.1	KLF4	ZNF665	MAOA	TMEM102	TMEM88	DDAH2	MAP4K1
	NNT-AS1	CDC26	MRPL2	SDHC	AP000487.1	UNC45A	AC005288.1	RNU6-1263P	PRPF40A	RHEBL1	ERCC1	ERP29	AL132657.1	ARL10	AC019097.1	DZIP1L	TRMT10B	PITPNC1	CREB3L2	AL669831.1
	PDLIM3	PNMA1	AC034234.1	IRF5	TSEN2	SPARC	AC068672.2	IL6R	ATXN7L1	EXOSC10	AC130371.2	BCKDHB	TAGLN2	KIZ	RBM20	CDC42EP2	FPGT-TNNI3K	AL078612.2	DCAF16	MATR3
	RNF126P1	AC040914.1	AC025048.1	TRAPPC11	AC010522.1	STXBP4	FTSJ1	YIPF3	FDX1	AL591503.3	PLCL1	LINC02611	AC112503.2	AC093423.2	TEDC1	ESF1	POGZ	AC004448.2	AL353662.2	TMEM234
	AC021088.1	PSMB7	PLA2G5	PYGB	GIMAP8	METTL15	ZNF510	ZBTB40-IT1	ATG2A	DDX41	RPL23AP53	AC107021.1	TMEM209	FASLG	ACAP1	RNU2-13P	TIRAP	MXRA7	HOXC13-AS	CENPS-CORT
	ANKRD36B	ADH5	AL133230.1	ZBTB7B	AC007953.1	AL365181.1	CCDC87	RN7SKP239	RALGAPB	LEKR1	PPIAP84	SRFBP1	LINC01301	LINC01704	UBAP2L	TSPAN13	LUM	NUFIP2	CR936218.1	AL358216.1
	AL136380.1	BNIP3P26	NOMO3	KCTD6	ELP5	AL359314.1	AC110079.1	UNC5B	NLRP9	EEF1E1	AC099687.1	NME1	SLA2	NTMT1	AC144831.1	AC092658.1	ASGR2	TMEM222	RF00586	AL109804.1
	GLOD4	VKORC1L1	GPC6-AS1	TRAPPC2L	CD2	WDR20	ZC3H11A	ADAMTS8	U62317.4	NEK9	AC099568.2	AC005005.3	SLAIN2	PDCD1	HM13	SH2D2A	EBLN3P	LINC00886	PRKACB	NFE2L3
	SERPINB6	MAGEE1	GTF2IP9	CD79B	LINC01146	TJP2	AC079834.2	TIMM13	CCDC27	PRTFDC1	AC010326.1	AC022173.1	RN7SL246P	HSH2D	IFITM1	NDUFAF8	JAG2	HTR4	LINC00623	AC061961.1
	PTGFRN	KLHL38	CD3E	TJP1	AC107072.1	PAXBP1	ADNP	ZC3H12D	MTMR4	AC006033.2	ARL13B	FBXL4	YPEL1	AC092910.3	DCN	ACRBP	ZNF620	RF00019	RNA5SP452	NRSN2-AS1
	NDUFA4L2	TRMT61B	UQCC2	HSPA12B	USP27X-AS1	CRAMP1	ZMAT1	KIAA0232	AC012511.1	MYL9	YTHDC1	ZSCAN30	LINC01480	C18orf25	COL5A1	AC005746.1	RF00601	SLC22A3	NFIX	ZNF569
	DMAP1	MKRN2	AC093582.1	TFEC	AC006213.1	ABT1	HLA-DOA	DNAJB5	ARL6	DPH6	AC009927.1	AP000240.1	RGN	MIR30C2	IGF1R	DTX2P1	AP000911.2	RNU4-21P	CLTA	RPS15AP16
	TSC22D2	POLR2B	PI4KA	KIAA1191	AC145285.3	AL158834.1	USB1	SRF	RNU7-160P	HMGA1P2	ANKRD29	INTS6L-AS1	TOB2	WDR82	RPS3AP38	NCOA6	SIDT1	UBE2CP2	RN7SL239P	AK1
	SLC25A15P5	MIR3936HG	SUDS3P1	AC011899.2	SUZ12	KIR2DL4	KMT2B	HOXA-AS3	RPL7AP15	RNASEK-C17orf49	VPS45	SCAMP1	ZNF846	JMJD7	CEP120	EPS8L1	ZKSCAN5	AC008736.2	IGSF5	SZRD1
	AC007663.4	MCMDC2	EMC2	LINC00920	IKZF1	GUSBP4	HSPB6	44261	NLGN1	AC018638.2	STARD6	EVA1B	AC139795.2	SAMD13	FRAT2	AC074367.1	HSPA7	IDH1	ALOX5AP	CARMIL2
	FPR3	IRAK1BP1	BOC	AC097637.1	LRRC8B	AQP4-AS1	AC007038.1	PDZRN4	PSMB9	SLC25A21-AS1	WWTR1	AC027228.1	HIGD1AP12	AC134407.3	RNU4-8P	VPS37B	HIST2H3D	ICOS	CTSW	RN7SL303P
	GOLGA8DP	PPIF	FUNDC1	CERS3-AS1	NAPEPLD	FETUB	DNAJB11	ZNF428	PSTPIP2	COX4I1	TRAPPC13	LRRC45	AC090260.1	OLFM5P	LRRC57	SMARCC2	TRBJ2-2	ZBTB17	AC091675.1	UPF3AP2
	SCIMP	F13A1	Z99289.1	AC106865.1	PTPRJ	AL139132.1	AC141586.5	PLA2G12A	TBC1D7	LINC01944	PIK3CD-AS1	AC104260.2	ZNF500	PYROXD1	KAT2B	AC013643.2	FXR1	AP003392.2	MATN2	PNKD
	NTF3	CD8A	EIF2AK2	AL845472.2	AL354733.2	CAPN6	GZMH	NUCKS1	RAMP1	RYR2	ANGPTL2	PROSER3	FUT7	CHMP6	PCDHGB4	SLC36A4	NAT8B	RN7SL594P	RNY3P16	EFNB1
	LDOC1	TRAF3IP3	LRRC53	BNIP3P30	RNU1-27P	BLZF1	OCIAD1-AS1	GCFC2	RASSF5	FAM83G	WDR45	FTLP2	NEK1	PEX14	RRM2P3	DUS1L	HSPA4L	ZBED2	AC009336.2	ARMC9
	AL365273.2	KMT2D	AL139407.1	PNPLA8	AC004678.2	AC083862.2	PRRC2B	SIRPG	AC243960.1	AC018755.4	ZNF367	SIRT7	POU2F2	AC004004.1	GPBAR1	RN7SL665P	LINC02100	CRB1	GSTO1	AC097065.1
	AL133371.2	STX10	AL158207.2	PCYOX1	PLEKHA1	MIR32	TMPPE	BDKRB1	AL138781.1	CNOT6LP1	AP003469.2	CTLA4	FBXO3	WRAP73	C17orf49	HELZ	AC002400.1	ASPSCR1	RNA5SP78	CHEK2
	TIGIT	FABP5	DUSP2	HLA-DRA	MDH1B	ADNP2	LAP3	CCL28	PHLDB2	AC007563.2	PSME2P2	INPP4A	AC004067.1	AC019186.1	AC027644.1	MORF4L1P4	LRMP	RNF111	FAM117B	AZIN2
	S100A11	SLC35B2	AL137003.1	INTS6	TMEM119	AC002070.1	UBE4A	AC079313.1	AC021739.4	CELF2-AS1	AP003472.2	AL133216.1	FERP1	AC234782.4	ZNF787	TMEM39B	HEMK1	KIF21B	TNPO2	SOCS7
	AL356019.2	GBP5	GIMAP2	AL158207.1	SAR1AP4	AC108727.1	HEXD-IT1	SLC13A4	MIR590	AC124944.3	RNU6-30P	AC110995.1	FAM228B	PRPH	CCDC136	AC025038.1	MIR6081	CXCL13	SLAMF6	PRDX3P4
	BLOC1S3	DNAJB12	CASP8AP2	BAHD1	CLUAP1	KLHL28	AL161640.1	LINC01489	ODR4	CHMP1A	AL139421.1	ADGRE5	AL359962.1	ZNF286A	AC022182.1	AC092162.2	TCAF1	RSKR	CD84	AC010422.4
	AL353616.2	EDNRA	MIR550A2	PEX16	TRIP11	BBOX1-AS1	AL024507.2	HSD3B7	HPD	SNORA16B	AP001107.1	RAP1A	AC104109.2	TK2	CAPN11	P2RY6	ARHGEF12	PLXNB1	KLF2	ARHGEF9
	TMEM63A	NAB1	WDR64	PIK3R1	STXBP3	SYNGAP1	ACTC1	ACSF3	PARVB	AL139041.1	BMS1P19	POLR2L	AC005498.1	ACOT1	AC087301.1	AC004134.1	SLC15A3	OSER1	PGBD4	ZNF728
	KPNA6	AIM2	POLR2M	SMC4	AC046158.1	ADGRG5	MMP24OS	MIR548L	HS6ST3	GOLGA4	GMCL1	AC012433.1	PYM1	NMUR1	TSC22D1-AS1	C16orf54	PLXND1	RAI1	UBA2	AC010809.1
	EPB41	AFF3	AC046143.2	SNORD116-3	AC020612.3	SACM1L	AL132989.2	TMSB10P1	IL15RA	LINC02076	KCNE1	CYTIP	LSMEM1	LINC01744	EPX	RLF	DRAM1	IGSF1	WASHC5	OR6L2P
	PCDHGB8P	KRT8P26	RF00411	VAMP4	MBNL2	FPGS	FAM168A	BCL2L2	EMB	SMG7	ZNF160	RHOB	C11orf96	BX284668.4	BCL2L12	AC090539.2	SRCAP	LINC01436	UBTD1	FNDC4
	CD48	ASB7	AC091588.1	PHKA1P1	MDS2	AC010754.1	AC002553.1	SFTA1P	HNRNPCP2	CSNK1A1	STX11	MTHFD2L	MT-ND5	RNA5SP527	TTPA	TRBC1	PCYT1B	CDKN2AIPNLP3	RGS18	ZC2HC1A
	SHLD1	SMARCD2	MAD2L1BP	TNFSF8	AC010325.2	KBTBD3	PSMA4	ZNF669	RENBP	SWT1	ARL17A	DHX9	CCDC26	LSM14A	RNA5SP187	AC025265.1	KAT5	IMPDH1P11	C19orf44	GABBR2
	SPATC1	LAG3	TSPOAP1	NHEJ1	AC011912.1	LILRB5	LINC01088	RANGAP1	ANKRD20A18P	PLA2G7	WRAP53	RPH3AL	FOXJ3	TCAIM	MAGI2-AS3	PPP1R26P1	AL360089.1	COL1A1	ADCY4	SALL2
	INTS7	HIPK4	OXCT1	LINC02328	AL049796.1	AC007552.2	FAM124A	HIGD1A	CYGB	SELENBP1	C21orf62	AC016251.1	GIMAP7	NUP58	DMRT3	ZNF625	KLRC1	MSR1	AC012555.2	TECRP1
	KYNU	TBC1D22A	CEP57	C9orf3	IDUA	GTF2IP5	WIPI1	AC020612.1	SLK	BNIP3P42	AL512791.2	CIAO2B	MTFMT	INVS	FBXL3	ERCC6L2	ATP5MC1P4	RNU6-767P	ZNF37A	FAM218A
	AP001282.1	RBM38	LTA	SP1	LINC01356	BMP1	POMK	C2CD3	RAD51-AS1	AC245128.3	PRKCH	AC107072.2	MACORIS	MACROD2	EHBP1L1	TMEM155	BIN2P1	HOXA6	PET100	AC026471.4
	FPGT	SLTM	FAM214A	ZBP1	AC017002.3	SRPX2	ATP1B1	TMX4	SLAMF7	ADD3	FBLN2	GIMAP5	SLC25A39P1	OSBPL11	TBX15	LDHAL6FP	ZNF564	PIAS2	TRAF6	AF131215.4
	AC021028.1	MCCC1-AS1	SNRNP35	GALM	LILRA2	LINC00997	SNRPCP11	GIGYF2	AC015818.2	LILRA5	RBM26-AS1	AP001462.1	AC009119.1	SMAD5	ASH2LP3	LLGL1	LAMP3	AC005838.2	AF201337.1	AL359198.1
	WDR5B	WASL	ZNF302	MIR7111	AC117834.1	RNU6-834P	SLC25A46	SEL1L2	ZNF527	AC104113.1	AP000648.3	RNU6-26P	AC007566.1	AL121830.1	SPATA24	AL132656.4	TEDDM1	ASAP2	BHLHB9	POPDC2
	PHF7	VASN	ZNF844	TCF7L2	AL080243.1	HMGXB4	ADAM28	CBX6	FAM30C	SLC49A3	KBTBD12	NEU3	LINC01799	FCGR2A	LINC00472	EML1	CHRAC1	AC116903.2	SBF2-AS1	CCDC137
	THRB-AS1	NXPE4	RDM1P3	PPIB	CYP2F2P	AC021086.1	ATP5MF	TRIM56	APOO	ACADVL	SNORD104	RELL1	CYFIP2	ROR1	LMAN2	MIR7156	CFP	JADE3	OAZ2	AC091551.1
	PCGF7P	ZNF839	KIAA1328	AC015911.3	PPP1R16B	RFC1	SUMO2P13	FAXC	ZNF713	PFN1P3	TRPC1	ANKRD46	MYL12A	NEMP1	ZNF841	BLNK	AC083798.2	UROS	AC002091.1	FLT3LG
	GBGT1	CTSZ	ZDHHC12	TXLNG	DCDC2B	MTMR12	MTX3	CD200R1L-AS1	KCNK5	HOTAIRM1	UBQLN4	CLN3	STRBP	AC010615.2	AC107029.1	AC090515.2	Z97633.1	AZI2	EDEM2	WIPF1
	SLC16A13	ZNF540	BST1	INSR	RAB27A	XPNPEP1	PRDM10	DCLRE1A	BCL3	MAD1L1	HDAC5	ZNF805	QDPR	TXK	EOMES	SEMA6A-AS1	DHRS4L2	OSGEPL1	PPP1R3D	GIGYF1
	RPE	ALDH3A1	LEFTY2	ZNF561-AS1	AC004696.1	KLHL7-DT	PRDM6	YOD1	VTCN1	TTC28-AS1	NMBR	AC090774.1	LGALS3BP	AL162725.2	AL162586.1	AC016876.3	SACS	HLA-DPA1	RPL7AP10	SLC38A5
	MRPS17	AC006349.1	AC012531.1	USP20	C1orf174	AP001372.2	PIH1D1	RNA5SP467	PLD6	AL136982.6	AP000317.2	PTPRC	APH1A	CDC42EP5	BRMS1	BCL6B	AC011290.2	TOGARAM1	ANXA2R	PCAT19
	AC131971.1	ZFAND5	SLFNL1	ACVR2B	AC069281.2	YY1	CSTB	TARBP2	AC127024.3	RAD17	MIR151A	P3H4	SRP68P3	AC004024.1	SERPINB9	SPATA25	ZNF776	AC069257.1	PLK3	Z93930.1
	AL445470.1	SIN3B	RN7SL812P	AC079015.1	ATP1A1-AS1	C17orf75	CAPZB	NUDT18	DHRS4-AS1	NAA38	RPL12P6	LYPLAL1	BSN-DT	LILRA4	C2CD2L	CCT8P1	TMEM71	AL139125.1	AC096582.2	NIPSNAP3B
	TASOR2	AC091588.3	NPM1P25	AL162431.3	USP8	AC090617.5	AC022150.3	C6orf62	SLC25A23	LINC01357	BVES	MIR3942	ZNF683	TRBV7-3	LINC02104	AL353743.1	AC024267.4	AC062037.2	ZMYND19	CDK5RAP3
	AC106795.1	FCGR2B	AC022395.1	RNU6-550P	BPTF	MEA1	AC109630.1	IL1R1	TLR8	B3GALT5-AS1	ETFBKMT	RNA5SP288	AC123912.1	HMHB1	SPAG16	PLAU	ZNF44	BROX	TST	AC113382.2
	AL353596.1	PITPNA-AS1	TRIM4	AL078581.3	APOL3	MYBBP1A	FBXW2	CHST13	CARNS1	FAM151B	BAG5	NFKB2	TIPRL	THOC3	AC241585.2	CBFA2T3	PKMP3	PHPT1	KLF17	FAM66A
	HSD17B10	AL356801.1	MSRB1	IDH3G	FBXL15	MT-ND4L	ODCP	NEDD1	EBAG9	ST8SIA4	AC010504.1	AC009812.2	AC053503.1	RAB33B	BYSL	TNFRSF8	TTC33	SPATA9	TBXA2R	SUN2
	ICOSLG	TMEM231P1	ARNT2	TYW5	IL27	AC007036.1	VENTX	SEPT7P2	AC011899.3	CRELD2	RHEB	AC015908.3	TAPT1	RPL21P32	MFSD3	RN7SKP163	PAX3	AC017015.2	HIF1AN	KIF19
	EIF2B3	LIN9	AC139149.1	ACTG1P23	AC116552.1	AC119428.2	AC015818.6	PRIMPOL	MMP19	CCDC144CP	AL136982.1	AC090948.2	LILRA1	AC125494.1	AC104058.1	BX322635.1	AC137630.1	TSNARE1	AC012618.2	AL049597.2
	EMILIN1	NME8	TRBV5-1	GARNL3	AL512343.1	ESR1	SLC35E1P1	AC068790.2	CDC37L1	AC005695.1	DTWD2	CCDC117	AC136475.10	ALG9	B9D2	AC008750.1	ENAH	FAM120AOS	RNASE4	THSD4
	KLF11	FLYWCH2	ZNF514	AC024933.1	BVES-AS1	WARS	PLEKHA4	THAP9	MGST2	KIAA0825	PIKFYVE	SLC9A1	MHENCR	CD6	JMJD7-PLA2G4B	DLG3	MIR1285-1	CREBZF	KLC2	MKLN1-AS
	C17orf80	ARMC4	HNRNPA1P21	TRIM6-TRIM34	AL109917.1	RPL23AP64	MRVI1-AS1	MBD3	SLC35C1	RHOT1P2	AC007292.3	DRD2	ZFP14	ZNF566	SNRPCP9	AL356215.1	C3orf67	FAM217B	HEXA	EIF3H
	SNORA59A	ZBTB20	RFX5	MCRIP1	AKIRIN1	MRGPRF	ANKRD61	AL353804.1	AC011330.1	TGFBI	KCNE4	AC007386.1	PPP1R37	HSPB8	TRAPPC8	WRN	TRG-AS1	PXMP4	LENEP	AC097460.2
	ANKRD10-IT1	ECM1	TOGARAM2	MIB2	MAN2B1	AC008393.1	ZER1	KCNB1	PHKA1	ATM	PPIH	IPO7	ZNF663P	FAM57A	RBM48	RHBDD2	F2RL3	AC138649.1	ATP1A4	AC007494.1
	ICAM3	MAP4K5	MAPK1	AC245060.2	AC117503.4	RAB3IL1	AC026410.1	LINC02256	AKAP2	MRPS31P4	SNF8	AC003002.3	AC092338.3	SYTL1	RPL13P12	VPS4A	PBDC1	STARD9	AC132008.2	TOMM20P2
	DLD	ZNF667-AS1	TNFAIP8L3	AC005410.2	SERPINF2	RNA5SP111	SLFN12L	CTU2	AC068724.2	TM2D2	HBEGF	Z95114.3	RANBP3L	WIZ	NXPE2	LRRC63	C1orf127	AC022960.1	TMEM74B	COIL
	HSPE1P26	SF3B5	ANKRD27	SIT1	LINC01881	AC005324.3	AP003108.3	AL031123.1	QPCTL	SNX27	DRC3	ZNF528	KIAA1614-AS1	TRBJ2-7	BMT2	AC245595.1	CEP70	BNC2	GPR119	AC026877.1
	ZNF710-AS1	KCNMB4	PODN	GAR1	GDF15	TRAF3IP1	SPRTN	HNRNPA1P38	SEMA3B-AS1	AC135506.1	PPFIA2	SLC7A5	DPYSL3	RALGDS	NUDT12	RING1	HAS1	AC025181.2	HMBS	CPLANE1
	HLA-DQB1-AS1	HTR2A	SNORA47	P4HB	NT5M	GPR82	GIMAP6	ETV2	KLHDC1	AKAP5	PITPNM3	AC127024.8	GALE	AC084781.1	VASH1	MIR887	HDAC4	AL358176.1	SCAF8	S1PR3
	RNU6-510P	LINC00888	DMRT2	BFSP1	PKD2	S100A16	EAF2	GSC	AC006363.1	AC008537.3	RNU2-22P	DLX6	XCL2	AC007731.1	LINC01871	UBASH3A	AC092611.1	AC133550.2	AC087071.2	SLC31A2
	BBOF1	LINC00987	CEP170P1	LINC01347	RN7SL803P	RTP1	AIFM3	CD93	AC021755.2	ISM1-AS1	AC008758.2	RPL23AP47	AK4	AC104076.1	TFPI	CDRT1	EXOC6B	AC007952.6	OGFOD3	GSS
	NDUFA2	MRTO4	RBM12	GGTA1P	AC007952.2	ADGRE1	AC015804.1	POLR1C	PTCHD1-AS	FAM90A2P	ATP6V1H	PFDN6	RN7SL510P	OXSR1	RNF123	SUB1	BAZ2A	AC008764.9	AC096720.1	AC007390.2
	FARS2	AC073610.1	DDB1	LINC00944	AP001922.6	DENND5B	CCDC8	PTRHD1	AL162274.2	AKAP3	VLDLR-AS1	AC007842.1	TXNDC16	MAT2A	ECHS1	NINJ2	IKZF3	WEE2	GZMK	SMIM29
	AC018809.2	ZNF285	AC084706.1	AP002956.1	SRMP1	AL512625.2	NDUFA3	CD27	AL353622.1	ENPP7P8	RSPO3	GBE1	SPEF2	TRIM32	CEP63	TBC1D1	SMG1P1	AC008622.2	MRPL22	FTH1P27
	SERPINB9P1	TMSB4XP4	RSL24D1	MIR548A3	ARID1B	EDF1	AC124283.4	PRDM16	AL162431.4	CCDC142	TAP1	STARD5	ADAMTS7	TBX21	MRPL48	ZNF34	RNU6-125P	AP006287.1	AC005776.1	PQBP1
	CLEC12A	NUTF2	RNU11-2P	LRRC32	ZDHHC16	FKBP1C	CD276	ZC3H15	AL162731.1	TRUB1	MTND5P1	RHOH	HMGA1	CCNE2	NOD2	UCKL1-AS1	NUP98	AC025280.1	ARHGAP20	AC131182.1
	SH2B2	LBX2-AS1	PYGM	OSM	SMARCC1	ROBO4	CLDN4	TTLL11	AC138655.1	AC015813.5	TCF20	AC018511.1	STK26	SGCB	RPS21P1	GGCT	AP002847.1	DARS	SLC38A11	CD300LB
	LRP6	NAIF1	GYG1	TNFAIP2	AC092535.4	SLC9A6	ZNF33CP	ADK	AC003072.1	ATG16L1	PHBP9	LIMA1	SLC9A3R1	GAK	AL158212.3	ANKRD26	AURKB	AL355338.1	CLECL1	GIN1
	MRC1	CD1D	ABCA12	AC092068.2	CST3	EFCAB6	MOV10	DCST2	ARHGAP17	AL009178.2	KMT5B	PABPC1P4	OTULINL	HTD2	GFPT2	LDLR	AKR1C2	HAUS2	MPST	AC015977.2
	RN7SL81P	CDK10	FBXO38	AC090181.3	AL139128.1	JAKMIP1	ZNF800	C5orf51	AC004076.1	SKIV2L	KDM5B	RNA5SP298	C16orf58	AL136366.1	DVL3	ANP32E	Z68871.1	SLC24A1	EPG5	TTC37
	AC231981.1	LINC01879	PJVK	CSNK2A1	PTCRA	TOX2	DHRS4	MIR133A1HG	TWSG1	IL15	AC004585.1	AC068896.1	HLA-J	RN7SL569P	AL451064.2	AC012668.3	AC019181.1	AC023355.1	C19orf71	RRAS2
	CD3G	AC146944.2	CDC42	AC011481.4	MTPN	CXorf21	ZNF189	SEMA3E	INTS13	ZNF169	FAM205BP	VPS37C	ZNF518B	PTPN22	PMPCB	AC068875.1	LRRC37BP1	ADAM1B	SMARCA2	CD96
	VDR	ZXDB	HLA-U	GAB3	AC145098.2	AC092803.1	RNU6-5P	NCR3	SPIN4-AS1	AL162425.1	SNORA22	CCDC85B	AP003071.4	SPATA33	PAXIP1-AS1	NBPF12	FUT1	ATP5F1E	AP000866.3	AC024575.1
	MATK	OR5M14P	XXYLT1-AS2	HSPA8P4	NXF1	AC006480.2	SIRT1	AP002784.2	ORAI2	UPF1	ALG1L11P	CABP4	CXorf38	MIR661	PRELP	AC010735.1	CCR5	LLPHP2	RBPMS-AS1	CTHRC1
	EDRF1-DT	AC108673.2	DDX46	MRPS27	AP001793.1	RPLP1P13	SMC5	PPTC7	ARSA	DECR1	AC073257.2	AL357055.3	ZNF19	SUGP2	SLC17A3	CHD8	PRRC2C	IQCA1L	RF00015	S100A10
	AC007485.2	TUBGCP4	AL035409.1	FRMD6-AS1	LSM10	ZSCAN31	AL731577.2	UBE2G2	STK32A-AS1	MAPK7	ACOT7	IMP3	LAMC1-AS1	AF121897.1	VPS53	AC018816.1	AL049697.1	KDELR3	HLA-DRB9	CHRNB1
	TRIP12	MIR1231	ATG2B	LDB1	NXPE1	SEPT1	EGLN2	FSCN3	CWF19L2	KRT10	ZBTB8A	TBCD	VEGFC	AMMECR1LP1	FAM199X	AC008966.1	GPR21	NDST2	ALOX5	XKR5
	AC010368.1	PMS1	HLA-DQB2	LSM6	PGAM1P3	SYPL1P2	AC011008.1	RN7SKP97	ZSWIM5P2	GNL3LP1	TRAV21	TCEAL6	TIMP1	AL021997.1	PABPC1P7	IER5L	SLC52A2	AC010385.1	PSMB2	AC005261.3
	AC019084.1	AC092794.1	LINC02381	GMEB1	VN1R85P	AC019197.1	RPL35P2	RNU6-611P	RGP1	MS4A4E	AC024580.1	SRP19	AP003170.3	AC011445.2	SYNJ1	GOLGA8IP	BNC2-AS1	TASP1	AVPI1	KIF27
	KDM5A	ZNF14	ERBIN	PIK3C3	ZNF593	GABBR1	AC107926.1	AC005697.1	THOC6	AKT1S1	XPNPEP2	LSM12P1	BMS1P4	ZNF628	AC007787.1	QSER1	PAXX	WIPF2	ATP9B	MIR378J
	APMAP	PSMD13	KIAA0753	MIR30C1	CCDC93	STX18	YWHAZ	AC003665.1	PELI3	SLC38A6	TAF4	ZNF343	ESYT1	CCDC12	AL035413.1	VCAM1	PFN1P2	AC104316.1	AL512274.1	AC139256.2
	SNORD48	DNM1P28	AC026369.2	MAGOH	GTF2A1L	PFN1P1	ABHD12	CC2D2B	UBAP1L	AC092919.2	AC114501.1	CASP12	ZNF549	RASGRF2-AS1	SNX11	MIR3186	ZNF491	AC136443.1	POMGNT2	MACO1
	AC105339.3	ESRRAP2	AL713922.2	LY9	C15orf48	AL031009.1	SUMO3	DDOST	PEX2	SIGLEC5	DNPH1	SNPH	AC109631.1	SH2D3A	MTCP1	PER2	ADAMDEC1	MIR598	C2-AS1	ULBP2
	AC104212.1	LIPT1	AC091492.1	KIAA1211L	AC098851.1	ZNF571	FN1	ATP11B	LINC00337	AC013643.3	CD34	OR2A7	AC093010.1	PRIMA1	RNU4-62P	SEMA4D	GFI1	CAV2	AC004471.2	PRUNE1
	TRBJ2-3	CARD6	PLEK2	SLC25A39	TBC1D10C	AL096712.1	AC000078.1	CCDC61	SOS2	NELFE	PYGO1	P2RY13	PIPSL	RNU2-28P	FBXL2	ARHGAP42	MNDA	NRXN3	KLHL35	AC136628.3
	HYI-AS1	TNFSF14	AC016582.3	RNMT	DNAJC8	JADE1	SARS2	SDAD1P1	VANGL1	RNF11	GFOD1-AS1	SLC12A5	CD5	AC139099.2	GLMP	CCDC110	PDS5A	TWISTNB	AC020604.1	AC083843.1
	AL627309.6	AC138956.1	MYCL	ARHGAP15	SGPL1	C8orf44	GRM7-AS1	ZBTB25	PECAM1	AC092040.1	TRMT10A	ZNF570	STYX	CLDN5	NUDC	SNORA80E	NEDD4	HECTD1	ATP5ME	RNU6-1156P
	Z97985.1	AC005899.5	PIP5K1C	INPP5J	MIR1255B2	WNK1	LRRC37A2	AC009120.1	IMMP1LP1	MRPL41	GPX1P2	NWD1	MANSC1	ZNF213	FTLP3	RNF181	ZNF780B	ADAM8	COX6CP15	PPT2
	AL356124.2	RBM27	C6orf136	RAB5A	AC090578.1	SPDYE1	HMGN1P15	NLRP1	CELF2-DT	IPO5	TNFRSF10C	PKD1P5	IL18RAP	AC011477.3	TRAV12-2	FABP5P3	FBXL18	AP001893.1	ZNF696	MBD1
	MIR627	AC016734.1	MFSD1	RAB11FIP3	ITGAD	UBE2MP1	CLDN7	AC007448.3	FAM84A	AC130352.1	AC006004.1	AC006210.2	CDCA4P1	SMURF2P1	APLNR	MYEF2	PUS1	NUDCD3	NXNL2	AC008750.2
	MIR3136	AC008752.3	GZF1	IGFBP5	AL023755.1	FBXO21	AL360093.1	AC116609.1	ADAT3	AC024940.4	ECHDC1	S100A8	GALNT17	PPP1R14BP3	LCP1	AC015911.1	AC027237.2	CASP9	SART3	AC007557.1
	PSAP	SNORD53B	AL031775.1	RN7SL652P	AL662791.1	AC096887.1	TPM2	RNU6-495P	STON1-GTF2A1L	STK32B	CHRM2	AL391840.1	AL357134.1	RNASE2	AP005264.1	COX10-AS1	MED28P3	KIAA0408	MIR4674	AC109460.2
	SNORA55	GNPDA2	AC009996.1	AC069542.2	DDX28	SCYL3	AP001972.5	KIF3A	AC093525.7	CDK6	EIF4A1P10	GPAT2P2	AL591721.1	AL021707.6	AC087276.2	AL158829.1	AC020978.1	TRBV3-1	ZFAS1	TRBV9
	FAM90A25P	EIF4EBP1	UCHL1	USP47	CD300E	CAMTA1	44263	NAA10	RNU6-610P	AP003465.1	DIS3L	MAP7D3	PTGES3P3	IQCJ-SCHIP1-AS1	AC091167.4	MIR4733	AC005785.2	SFT2D1	AC090229.1	AC004921.1
	MAPK13	MIR6508	HCG17	ZNF546	ACTA1	RIN1	DESI2	AL589666.1	RN7SKP75	TBCK	DOK1	FBXW9	COL4A3BP	PCDH1	AC015987.1	AC073611.2	ANXA9	MLXIPL	TNFRSF14	XRN1
	AC107375.1	AC009967.1	AC010336.5	AL359541.1	ZNF815P	CNTLN	AC008760.2	TNNT3	GOLGA8Q	SLC39A11	QRICH1	VPS9D1	ITGB7	AC113167.1	CDK11B	ARHGAP27P1-BPTFP1-KPNA2P3	TMEM183A	NFKBIB	KCNN2	BCLAF1P2
	C6orf201	ZFYVE27	KLHL25	EXD2	JUNB	FLVCR2	AC008429.2	APTR	ALG10B	CXCR2P1	SIK2	ZBTB48	FAM174B	SEPT7	TNPO1	AC105052.1	AF274858.1	SLC9A7	SUDS3	ZNF518A
	ACAP2-IT1	CTSV	RIMKLA	SEZ6	LINC02157	NDUFS6	LINC00899	AL109933.4	DYM	AC010230.1	FKBP1A	TRGJP1	ACACA	AC211433.1	GLO1	AP000317.1	ZNF676	CLTRN	RPS6KA4	CASP16P
	AL450306.1	AC022306.1	AC087521.1	LRRIQ4	AP4E1	AC003965.1	TLR4	AC079168.1	IFI27L2	PEX19	ADAD2	UNGP3	RN7SL726P	SPINT1	RN7SL426P	RABAC1	AC020915.2	AGK	AL158062.1	GINS3
	ADGRE2	CCNI	AC015813.7	RHOC	CNBP	CCL5	AP000692.2	FAM209B	MTND5P28	DIRC1	DIP2A	ANKEF1	ASB13	URB2	AC134772.1	MYD88	CACNA1C-IT2	ADM5	CACNB4	LINC01133
	PLOD1	PIP5K1A	SLC12A7	LINC01808	TRNT1	FTCDNL1	LINC02391	SAR1A	AC034102.6	AP000944.1	AL591468.1	UBE2J1	AC091982.1	AC090695.1	BNIP1	C5orf15	ALG1L12P	SIGLEC16	AL589745.1	CELF6
	AC083964.1	LINC00852	AC105339.2	PCIF1	AC093305.1	SLC2A1-AS1	PGF	CASC4	LINC01943	ZBTB14	CALR	LTBP1	AC092667.1	AC005828.5	RXFP1	OLFML2A	SAG	OGFR	C1orf21	IKZF5
	RBBP4P2	PIEZO1	ISG15	ESCO1	NFE2L2	ERVFRD-3	NLRP12	ADAL	ETFB	COG5	CR769767.2	AC096642.1	AC092117.1	TWIST2	AC136944.3	MEIS3P2	GRID1-AS1	PRR32	AP000446.1	AC005253.1
	PFKM	SNRPA1	AC093367.1	AC087362.2	AHNAK	AC119044.1	STK39	ZRANB1	ARAP2	SGMS1-AS1	ZNF605	RASA2	UBE2S	PPARA	UBQLN1	SZT2	AC005586.1	AL031008.1	ST3GAL4	FZD7
	AC090505.2	AL596087.2	LRRC34	RBP5	AC079089.2	AC007998.3	OR7M1P	PPP6R3	SNORD116-19	KLHL21	KIF13A	TRAPPC2	AC008124.1	AC114980.1	HLA-DQB1	MIR548AA2	RGS2	AC008735.4	NAA35	REST
	PPM1E	RPL7AP2	NECTIN4	RF00265	SNX1	AC009509.4	IL20RB	HMGN3	RPS6KA6	AC105129.3	SCG5	POLH-AS1	MTATP6P11	AC046134.1	SH2B3	ZNF667	EGF	MCM3AP-AS1	HSPE1P21	SRRM4
	FGD5	RPL39	CAMTA1-DT	AL355001.1	RF00272	G6PC3	GTF3C6	PLEKHG5	TRGC1	DHX35	PRKAR2A	AC004461.2	DNM1	NCR1	AC127496.2	SCARA3	EGFL6	Z99943.1	AL163636.1	AC110373.1
	MIR125B1	SCN3A	MIR6891	GRIN2D	AC079781.1	N4BP2L2	FTL	P2RY10	TAS2R31	STK17B	TRIM52	ABCA7	WEE1	AC099509.2	AC010998.1	ZNF197-AS1	ZNF227	PLA2R1	S100A14	TMEM121B
	TRIM66	AC125618.1	Z98885.3	LPAL2	ZXDC	ZNF253	NEXMIF	TACC3	SNX18P13	FFAR4	ACTN4	PROCR	AL121906.2	ZDHHC21	PIGL	CYB5D1	GPR157	FAM117A	AL356756.1	TRABD
	ZMYND10	AL121906.1	AL355864.2	MRPS31P5	RND1	NFX1	PAPOLG	AC015688.4	C1orf109	SEC23A	TATDN2	AC138811.1	NVL	Z97055.1	SUCLG2	NRAV	HLA-DQA1	UTRN	AP002008.3	CIB1
	AL121672.1	LINC01800	TMEM253	SYNGR2	RN7SKP285	ZNF98	AC078909.1	TYSND1	TENT5C	ZNF827	SETDB1	MAP2K2	GALNS	LINC00471	SRRM1P3	ANAPC11	AC007382.1	FAM205A	ZMYM3	SNAP23
	DNM1P32	FAM177B	AP001486.2	DENND5A	AC090409.1	ACER2	AC021078.1	AF127936.2	GPR141	NOC2L	PYHIN1	RNU11-6P	AL021068.1	SNORD62B	AL353705.4	DGKD	SULT1A1	C18orf32	AC104564.3	AC069185.1
	RANP4	KRT8P10	PSIP1	RNU6-1262P	PABPC4-AS1	AC020913.3	GAPVD1	GRK3	CATSPER2P1	AC022445.1	TLDC2	ARRDC2	RPS3AP34	AC100793.3	HSPBP1	PDCD6IP	AGAP4	TRAPPC1	AC016957.2	MED13
	AC005237.2	HDGFL3	A2MP1	RAB2A	SNORA15B-1	GPR173	AC092118.2	LOXL1	LINC00689	GTF3AP2	LINC00426	ARGFXP2	AL136322.1	RHOQ	LINC00511	XYLB	AC024940.6	AC087393.1	CCNI2	AL357143.1
	MTHFD1L	AL138781.2	TMEM204	BICD2	AC020937.1	AL157935.2	RPL7P17	AC097534.2	RNU6-529P	PGM2L1	BSPRY	TRMU	TPMT	AC136443.4	MSH6	RNU6-1316P	LINC01638	A1BG-AS1	TLE2	AC244517.8
	AC068594.1	ALYREF	RNF130	AGAP1	IGLV10-54	FAM167B	SNX19	AC090004.1	LINC01558	TMEM220	PLCD1	RPS3AP14	AL139022.1	AC092944.1	AC243830.1	AL021407.3	TRBV4-1	TOMM34	AGBL5-IT1	ZNF417
	AC115837.2	AL360268.1	RN7SL333P	ZNF33BP1	AL161658.1	AC006960.1	CA12	WNT10B	AL109614.1	ZNF84	FMN1	SEC61A1	TMEM219	BX293535.1	MIR1272	NEURL1B	SMG9	AC010530.1	AVL9	HMGB1P41
	ZRANB2-AS2	ZNF525	OR7E101P	AC007204.1	CERNA1	RN7SKP228	ATP6V1F	AP001469.1	AC104971.1	DNHD1	MMP25	SELENOS	BX323046.1	RNY1P13	AC113382.1	C5AR2	SLC25A25	CLEC4E	AC010973.1	THBD
	EIF3L	KAZN	AKAP9	LSM2	RNU6-1098P	ALG11	SLC16A1	LRP5	C20orf202	GNB1	TRAV30	PDK1	ZNF354B	DIAPH2	FAM86B2	LTC4S	IPO8	TAS2R19	WRB	SIPA1
	AC105389.2	ZNF862	LRG1	APOL1	TCEAL2	CCDC71L	GALNT13	CEND1	UBE2Q2P1	AP002495.2	CCNQ	AC055811.3	TBC1D5	ATP6V1E2	AC138207.1	TRBV18	POM121	FALEC	CRTAM	HASPIN
	G6PD	TRAV24	ENDOG	DOC2GP	GPX7	SNRPCP17	AC092809.2	AC068446.2	IFI44	CROCCP3	SMYD2	LINC01675	AC018462.1	KHNYN	STXBP2	AC008770.2	AP001972.1	CD38	ANO3	NECTIN1
	GOLGA8H	AC099811.6	DRG2	LAD1	MIR4538	AL139035.1	AC087468.1	LINC01990	SHC1	PHTF2	PCDHGA2	ARMC8	PYCR1	RNU6-584P	AC021945.1	AP000525.1	MEIS1-AS2	REV3L	GRAP	AC124067.2
	AC066613.1	GSTZ1	PPP2R3B	VNN2	CARD17	MTA2	DEFB109D	DNAJC1	ETS1	SAMD4A	MYL12B	CCDC91	COL4A2	RHOBTB3	GPC2	C11orf58	TOPORS	AL031289.1	LINC02280	PPIAP41
	MMP9	POLR2G	ORMDL2	BRD1	ITGA7	AC135983.2	SFN	UNC5D	C9orf66	AC053527.1	CREB3L4	AC004771.3	CSPG4P11	LNCOG	HLF	AC007216.4	AC016586.1	ZNF785	RN7SL15P	AL137186.1
	GPR107	TIGD7	DHFRP1	MORF4L2	AC008897.1	RNF125	ASPHD2	MMP17	AC024293.1	AP001922.5	AL133153.2	CYCSP52	AL109918.1	PIK3CG	GDAP1	INHBA-AS1	SDHB	FBXO10	UACA	PPP1R21
	AC136475.1	TET2	GSDMA	DAGLB	PREP	RNU6ATAC38P	TMEM50A	STAT6	DPP6	DANT2	TIE1	ZNF155	MCFD2	AL035411.2	CARD10	HERC3	AC096553.1	MRPS18A	DPCD	NCLN
	TPBGL	RPL11	AC010542.5	RNU6-375P	XPO4	AC022467.1	AC061965.1	SYBU	VSIR	S1PR2	IFNG	DUSP6	TYW1	MOGS	NIPA1	SLC2A5	RNU6-188P	LINC01534	AL390195.2	NFYB
	RHBDL3	MRNIP	LINC01154	RNU6-1339P	SPINT4	AL096865.1	AC003070.1	TAX1BP1	AL133481.1	AP2A2	SLC52A1	PRDM11	AC007792.1	IER2	ZNF462	MIR3617	AL356599.1	AC004854.2	AC005726.2	PWWP2B
	AC034195.1	MIR5191	WDR6	CIITA	AL354824.2	C9orf64	SPOCK2	AC103810.5	AC093700.1	MYL6B	KCNMA1-AS3	MAP3K11	AL137186.2	RMDN1	AC104771.1	MIR503HG	LCMT1	LRRC29	AZIN1	REXO4
	CFL1P1	MEX3B	AC087501.4	CLIP3	CPEB2	DEPDC5	DLEU7	TXN	RNU6-100P	ZBED8	AP000974.1	RN7SKP297	AP006621.2	AL031709.1	WDR1	TENM3	SNHG9	LHPP	ASIP	AC005021.1
	PEBP1P2	ADCK1	RF02116	PARG	Z99129.1	CRYAB	AC092468.1	AC004847.1	SENCR	KRT18P17	CHD1	NOL12	AC021752.1	GTF2H3	ELAC2	PELP1	REEP4	AC055876.2	ANKRD22	P2RX5
	NCKAP5L	RPL17P50	TTLL3	PRR13	WDR26	HLCS	GNE	AC098484.1	ZBED9	TCF15	RNVU1-4	RPS10P3	CD55	ADAM12	HIST2H2BE	NEPRO	TVP23B	AL450472.1	RN7SKP17	ZNF3
	Z95327.1	NR1H3	MDC1-AS1	PPP2R2C	SH3BP4	SORT1	RN7SKP271	AP005061.1	SLAMF1	GLS	DDX50P1	RF01161	FCRL3	ATAD3B	AC007786.2	CCNA1	KRTAP5-1	ZSCAN18	AC012360.3	SLIRP
	USP32	PCDH20	ZKSCAN3	GOLGA1	AC125611.1	LAMTOR3	CDK13	BHMT2	HIP1	FCN3	WFDC21P	CBFB	AFMID	TLR7	RBM5	ALAD	AC008763.2	ZNF788P	RNU6-1281P	AC012493.2
	RNA5SP275	ZNRD1ASP	NUDT8	AC004771.1	AL031598.1	ARHGEF34P	AC079089.1	BTLA	AC027559.1	AC243965.2	UQCRQ	GCC2	FKTN	UVSSA	FBXO9	AC092666.2	TTC7B	AP001056.1	TRBV2	KDM8
	EEF2K	MIR4502	RAD52	LINC01450	RNU6-1285P	AC005225.4	SEMA3F	RBFADN	SENP2	AL591895.1	ZNF391	FO393418.1	RAB12	SRRD	TMEM201	AC011477.6	NDST1	SNORD116-30	SMIM2-IT1	TRBV20-1
	AC104667.2	PTPRE	AL133371.1	AC026979.1	AC136475.8	TIA1	RSPO2	RPL13	ZNF433	PRXL2B	CUL3	Z98048.1	FAM110D	PHETA1	POTEI	AC008543.5	LINC01353	AL691432.1	ZNF512	FLNB
	TMEM191A	SRSF2	VN1R87P	SMC5-AS1	ACSL6	EFHC2	ARHGAP42P1	PSAT1	PSMC3	AL078459.1	CNGA4	AL353743.3	CKAP4	DTX4	AMPD3	AC005291.2	C4orf54	SERTAD4	PLEKHG1	ZNF257
	ZNF235	AP000873.2	FRMD4B	AC053503.2	ZNF470	SULT1A2	AC006994.2	MIR4636	HDAC11	RNF219	BOLA2P2	AC016747.3	AC011411.1	AC012360.2	SPEN	GPR34	NRAS	PTX3	AC011611.5	SRP14-AS1
	TRPM7	ZNF117	ARL13A	AC068533.4	AL031595.1	PPP1R14B	PSMA5	LNCTAM34A	ATP7A	MUC20P1	ATRIP	TACO1	IPO9	AC022784.5	STAT3	ZNF112	CLVS2	LINC01778	AC109992.2	PPP2R2B
	TNIK	ZNF268	STK33	COQ4	CAMK2N1	RNF217-AS1	BST2	NIPBL	DHRS3	AC139495.3	ZMPSTE24	AP006289.1	MTMR7	GPX1P1	CEBPB	AL391069.2	ZNF596	CLNK	ZNF670	CHST1
	RNU6-807P	RN7SL614P	AP000907.1	AC016738.1	SEPHS2	PRKAR2A-AS1	ZNF146	NSD3	EXOSC10-AS1	ZNF354C	GALNT10	AC009690.2	FCHSD1	TSSK3	ZIM2-AS1	AP4B1	AC011477.5	RNY1P16	ADGRL1	C16orf45
	RF00322	POMP	MINDY1	GTF2E1	AC104463.2	LINC02308	CCDC148	MROH7	CAV1	TCEAL3	ATP5MPL	DOLK	ATF7IP	DLL1	MAATS1	CD79A	FKBP15	NXT1	TECR	RPL7P50
	AC010173.1	SNORD13D	ARAP1	RNU6-589P	LINC00239	LINC01504	BCL2	AC009704.2	AC007556.1	MRPS12	AL139142.1	TOX4	FLG2	ICAM1	LDHAL6B	ABHD11	SNX19P2	ZNF296	AC133473.1	CAP1P2
	ACVRL1	RFLNB	CXCR6	EIPR1	GVINP1	AC012358.1	SCOC-AS1	CCDC191	C16orf74	CYP46A1	MTND4P26	INTS11	NARS	KDM2A	LRRFIP1	HNRNPU	EXOC7	AP003084.1	RGS16	SSUH2
	FKBP2	FAM189B	FAM45A	LYG1	STMN1	FUT9	TBC1D14	GPR160	SNORA59B	EVC	VWC2L	UBD	ZNF772	TRBV7-7	HACD1	JRKL	MIR5008	AC073343.1	AC009716.1	RBL2
	MRPS15	AC079341.1	UXS1	EIF4A1P4	ARMC7	CTBP1	AC009955.3	AC092042.3	AL590226.1	ARMC10	LPP-AS2	OTOF	TSPYL2	AC114744.1	AC015908.1	PNKP	HOXB7	AC090877.2	AL354718.1	NUP205
	TTC38	EXOC5	ERLIN2	DGKZP1	AC092070.2	UFL1	METTL21A	UCHL5	AC006449.3	EPRS	MIR548I1	NCCRP1	NDE1	TAGAP	AP000943.3	TMA7	AC007638.2	MED27	AC097103.2	KBTBD7
	AC079313.2	ABCF3	RNF113A	CHST12	GTF2E2	ACOT11	CTSA	AC015819.2	PCDHGC4	ISCA2	TGFBR3L	DDAH1	RTL8C	AC112694.1	GLRX5	RIIAD1	PITHD1	KIR2DL1	AC115223.1	ARID1A
	RTRAF	AC139103.1	RRM2B	DDX24	MIR1273C	RNU6ATAC17P	RPS29P5	RN7SL154P	HLA-DQA2	DUXAP8	PRDX3	SAXO2	NDUFA1	S100Z	ANKRD17	DUXAP9	CFH	DDX3X	SH2D1A	AC004241.3
	ZNF260	RPP21	ZNF708	EXOC8	BCLAF1	HEPH	SLC33A1	HSPA1A	AC022706.1	DDX42	LATS1	NPHP3-ACAD11	AC073050.1	KRT18P59	CYTH2	AC023886.2	NAIP	TECPR1	ANKRD20A11P	AC008481.2
	44256	VMP1	DNM1P41	IQCD	AC100861.1	CES3	PEAK3	PUM1	CDNF	PSMC5	LINC01198	LANCL3	AC005498.3	AL359091.5	HMGA1P4	AL118556.1	STRN	AC093390.1	TOP3A	SPIN3
	PLEKHO2	ZKSCAN7	PTP4A2P2	AP5S1	AL683807.1	MED31	LRRC37B	FLYWCH1	AC139887.2	AC018410.2	CXCL1	MYO3A	AL357033.4	FTOP1	AC110769.2	RPS23P6	RNU6-828P	FAM47E	DNAJC19	ARAP1-AS2
	AC104232.1	LINC02345	AFG1L	BRWD1	FHDC1	KIFC2	AC234775.1	LINC02166	GPR179	MTREX	ATP13A1	L29074.1	RF00614	AL442071.1	EFNA4	URM1	NIPAL4	PHF23	RNA5SP101	AP001885.1
	ABHD14A	AL136162.1	GPX4	AP000873.4	RALYL	FLCN	AL354685.2	AC055811.1	AC233702.5	LURAP1	UBE2L4	SEC14L1	TRAV41	STN1	CCL23	MTND2P12	RUVBL2	AC008494.3	ZNF154	SNORD14A
	LGMNP1	AC016405.1	MGRN1	KCNS3	CENPX	PLXDC1	OASL	AL391994.1	LINC00641	AC007066.2	LINC01352	C6orf203	NR3C2	TRBV19	LINC00926	AC138932.5	AC005722.1	DYNC1LI2	RAB11A	AL357146.1
	AC025178.1	MTFR2	RGS11	LYSMD1	DNAJC10	ZBTB45P1	AC093835.1	TPI1P4	AC006042.1	KARS	RN7SKP70	SIX2	AC012181.1	AC104825.1	CARD8	TSC2	TNFRSF11A	SEMA7A	RUSC1	MS4A14
	METAP1D	SUPT16HP1	ITGB5-AS1	SEC62-AS1	RBMX2P2	TRGC2	MCF2L	SNHG12	MZB1	AC005005.1	TMEM161B	BRS3	AC090206.1	BRSK2	LIF-AS1	TRBJ2-2P	UBE2SP1	AL139100.1	SIRT2	AL157373.2
	JUND	SNORD116-25	SEL1L3	C10orf25	AC092835.1	CKMT2-AS1	AGAP2	DLAT	CDO1	SEC22B4P	EML6	SPATA5L1	ARHGEF37	LGALS3	FBXO22	TWF2	CPLX1	DNAJC27-AS1	AC068946.1	AC026801.1
	USP54	AL591516.1	AC004593.1	TRAV8-3	RN7SKP251	CBWD2	PABPN1	AL450344.3	MTCO1P11	CHID1	TMEM61	MT-ND2	TMED3	COQ8A	GAB1	LINC02669	LRRC8C-DT	UBAP2	PRICKLE1	MT-ND1
	EVA1C	RN7SL268P	ZNF29P	ATG101	NPM2	AURKC	RAMP2	PMS2P5	MRPS34	BCAN	LPXN	ALG14	AL645939.2	PHLDA1	RAB5B	AC087289.2	AC011825.2	AC018904.1	ZNF395	ENO2
	PRRG3	HLA-P	AC000089.1	HIF1A-AS2	FCN1	RPRD1B	SNORD116-29	PALM2	PFN1P8	AL365338.1	RNU4-6P	TSACC	AC026904.2	XCL1	LINC00885	CCL13	AC008627.1	AC135050.1	PSMB3	AC097376.1
	RF00334	PABPC5	AMD1P3	AC003988.1	LCOR	LGALS2	AC087294.1	ZXDA	RPAIN	NEFH	AC090607.1	LAMTOR5	IKBIP	TRAV36DV7	TRAV8-6	RPL32P3	RTN1	AC087477.6	FCHO2	KCNH4
	PPP1R26	AC090286.2	AF230666.1	AL391987.4	LINC01960	YWHAH	PGM5P4	TPCN2	AP000547.1	CCSER1	CMIP	HRNR	ISOC1	CD99P1	LINC02422	44258	ZNF660	AL079342.3	LSM7	FAM102B
	AL122035.1	SNORD60	CTU1	ST7-OT4	GALC	ARHGEF15	LCA5L	AC073592.3	RN7SL481P	RPL35P1	AC005740.4	ADAMTS1	ATP1B3-AS1	AL021408.1	TENM1	SYNE2	PMF1	PFN1	TSC1	FUNDC2P1
	FBXO6	RAB42	CLPTM1	AL137127.1	AC124303.1	AC005839.1	SMIM3	ANKRD20A21P	AC009220.3	RNU6-924P	RNU6-553P	RNA5SP132	CAPN2	AC009171.1	CLEC1A	AL031713.1	RANP3	TSHZ1	TRBV6-6	RNU6-1331P
	MIR3677	CCM2L	AC106037.2	AL354920.1	TNPO3	EPHA2	MPRIP-AS1	TRBV6-1	TSSK6	AC092803.2	TMEM141	ADH6	TRBV5-6	ARHGDIB	MAP2K7	BTN3A3	PPEF1-AS1	TRBJ2-1	GCAT	AC003035.1
	FBXL5	XKR8	LCA5	AC068672.3	AC055855.1	AP006621.1	USP32P3	TP53INP1	LINC00243	MIR3936	NRARP	AL139124.1	CASC18	GJA8	SNAPIN	AC114488.1	AC008895.1	AC007405.3	TPT1-AS1	IFNL1
	AC018682.1	PRND	AC018761.3	AC008629.3	CSDE1	AC091544.1	CHCHD6	AC010329.5	AC008250.1	CROT	TOM1L1	CTDSPL	LINC00994	SERTAD2	AP003555.3	RNF144B	C5orf67	AC005514.1	USP13	AC023906.4
	NPAS2	UBR5-AS1	SUPT16H	AC011446.1	CD19	SYDE1	ERP44	RNA5SP311	KLF7-IT1	PFN4	MIR4258	NCAM1	NCBP2-AS1	AC019330.1	LENG9	NFE2L1	TMEM14A	SLC50A1	LRRK2	BACH1-IT2
	AC084036.1	FFAR2	AC010761.7	AP005019.1	AC037487.4	AL159169.3	AC010247.1	AP002884.3	IFT27	NPHP4	FAM180B	HLA-DPB2	AC100854.1	ACTG1P24	OPN4	CUTA	ARL6IP4	PDIA3P1	HELQ	ITFG1
	ST3GAL2	MMP14	C10orf55	ISG20	RPS2	SLC16A6	RABGEF1	HMGN1P2	TMEM106A	AC091965.2	AC053503.6	AL121839.2	CEBPZOS	ZNF850	SNAI3-AS1	NEK10	EIF4A1P2	AC015912.3	ABL1	AANAT
	PDLIM7	IGSF22	EGLN3	PCCB	AC244090.1	FAM43A	AC006213.3	AC110799.1	ZNF835	KCND3-IT1	AC087203.2	ETV5	MAGED1	AC100778.2	MIR938	AC022154.1	SMC3	MYL12BP2	TMEM63B	AL391001.1
	AL137003.2	TLR6	PAQR3	AC022215.1	PABPC1P10	SRSF9P1	AC026691.1	TNNI2	AP000811.1	AL157902.2	SLC25A6	VPS16	AL356417.2	FAM241B	SLC52A3	ABR	DFFB	C9orf16	ROPN1L	MARCO
	VNN1	GACAT2	PDGFA	PRR14L	ZNF543	SRGAP2D	WHAMMP2	PDCD6	CLEC18A	RNA5SP120	AL359878.2	AC005091.1	FAM66B	MRPS2	PPFIA4	CDC25B	CRY1	MXD3	AP003068.2	MT1HL1
	BX546450.2	AC110285.7	FAM225A	THSD1	SLC31A1	LINC02416	SIGLEC11	NAT14	APOBEC3H	GLRB	ZNF92P2	FSTL3	MIR3153	GNAI1	PPIL1	ST6GALNAC5	LAMTOR1	RPS3P2	MIR5695	MTAP
	KIR3DX1	AIG1P1	AC093010.2	RAF1	DOCK5	PGPEP1L	AL078621.3	CAPZA1	YES1P1	MTND2P30	RN7SKP266	TTC7A	AC097478.2	FAM201B	AC019171.1	AC027279.1	HPGD	RNU1-19P	SNRPF	SLC1A7
	AC008494.1	VPS25	PIF1	CRMP1	GPR18	TYK2	SNX24	AC147067.1	ALPK3	AC113385.3	HMGB3P32	ACTBP2	HYDIN2	PRDX4	SPTLC2	AL161757.2	DDX17	ARMC3	NUP214	AL121594.1
	AC005104.1	GTPBP2	AL035461.2	TRIM9	SECTM1	PRELID1	DIO3OS	AC083843.4	TEP1	RN7SL22P	GRXCR2	UBE2H	RNU6-182P	GJA1	CUX1	PIP4K2B	ARL4D	CEACAM4	CXCL9	SRR
	AC068587.2	PELI2	LPAR2	SGMS2	AL683813.1	TRIM27	RPL37	SSPN	GLYATL2	ZNF135	TRAJ11	RF00090	LINC00869	IRF6	WFDC1	PLEKHA5	RPL39P3	IGHJ3P	CXADR	RNF14
	GBP4	AL669970.3	METTL6	SPON1	MIR342	RDH14	TMED4	SNRNP40	ARMC5	NDUFA13	AL031705.1	HIGD1AP18	CASS4	NCLP1	MIR181C	HMGN2P5	C19orf73	NRIP1	TRAV10	TRAJ49
	ZNF442	ITGAV	SNORD116-8	AL023881.1	GLRX3	GULP1	EIF6	SNRNP70	ANG	PIMREG	AC009977.1	LACTB2	UHRF2P1	TMEM183B	LINC01359	TRAV27	SIGLEC22P	AL355852.1	LRRFIP1P1	AC084824.3
	XIST	AP000523.1	GREM2	AF064860.1	VAC14	AP001187.1	LYZ	TRBV10-3	AL138963.1	CCDC157	RN7SL145P	AC008752.1	AL008726.1	AC023162.1	AL035404.1	APBB1	RNU6-335P	C10orf105	DIPK2B	PKP3
	AC124784.1	TUBE1	KDELR1	AC129102.1	STT3B	RHBDL2	AC002350.1	AL353593.3	TRAV2	AC116609.3	C11orf53	ZYG11B	TACR2	SLPI	TMEM212	CDK11A	DPRXP6	CSPG4	GADD45GIP1	MRPS24
	CLCA4	CORT	COG1	AC093151.3	IGLL5	PSMA1	AP001208.2	AP001372.4	WDR34	AC005696.3	SLC12A8	KLHDC4	PRDM1	ASCC2	IFITM2	CHD4	TRBV4-2	UBR4	JUP	TAF9B
	PGAM1P8	NEO1	MED17	JPH4	HEY2	AP002495.1	NME4	TGFBRAP1	PDE11A	TRAJ29	STAT2	AL008707.1	AC108063.1	DCHS1	FRG1HP	SLC25A22	TCF25	NUS1P1	LINC01825	AL645941.1
	NRK	SLC22A15	AC025809.1	AC138356.3	RF02200	CPSF2	ERCC6	TRAV16	AC026471.2	RN7SL202P	IGHMBP2	OR2F1	DAPP1	RPL37P6	AL022067.1	RN7SKP80	OR2I1P	BLM	GNAL	ACOT2
	AC243836.1	ANKRD20A2	SLC5A3	XPR1	AL590093.1	AC092653.1	TIAF1	RNU6-23P	HMGN1P4	BBS7	COMMD4	AL359233.1	TRBV14	LINC01678	EMP1	TRDJ3	PSMA3	SLC39A3	CKAP2P1	TRAV29DV5
	ST13	AC004890.2	AC016954.1	PMS2P4	PRR5L	SPP1	MSC	BCAM	ZNF517	AC087318.1	AC005165.1	SNORD99	AL627309.1	B4GALT3	AC073912.1	RN7SKP240	TNFRSF10B	SLC37A4	AL133325.2	ZNF23
	METTL22	ARFGAP1	AC093323.1	DAD1	LRRC37A16P	MIR608	EDRF1-AS1	DNAAF3	UROD	FCGBP	DHX57	KLRF1	CCDC185	RN7SL403P	AL032819.2	GEMIN4	ZNF317	SGSH	RHOQP1	GTF2IRD2
	NRBF2	SLC27A4	AL121832.2	JMJD1C	LINC00861	AC007952.4	GPS1	CDAN1	STAMBP	AC020663.3	AC005332.4	YWHAQ	AC015911.8	RUNX2	AC025470.2	RABEP1	CERNA3	PIK3C2B	NRBP2	NOS3
	SLC25A51	CCL15	C19orf48	GATAD1	AL158211.5	ZNF219	FHOD3	NPM1P47	UNC119B	AL645568.1	SOCS6	SNORD116-27	MCOLN2	SNORA70F	IGHG4	MIR6819	CR1	PIM3	EIF3A	NCAPH
	AP001469.3	AP002884.1	EIF5AL1	RPL12P35	BTN3A1	GFOD2	ACER3	CCDC146	ZNF107	CX3CL1	SLC2A6	AL365356.1	GJA5	CNOT6L	RNU6-479P	AL590235.1	TTBK1	ARL5A	AL583808.1	RNU6-661P
	NARF	PFDN5	SMC1A	IL1R2	AP001029.3	TICRR	AC018638.1	RNF139	AC006994.1	AC010332.1	GABPB1-AS1	PMS2CL	PHF20L1	ADA2	MCOLN1	TUBA3D	GCNT1	AL049840.2	AC005261.2	EIF3EP1
	SPINK9	AC006064.1	RPL13AP25	ZNF460-AS1	FATE1	AC004908.2	TLR10	SAPCD2	AL133325.1	LRRC59	AC087516.2	CYP1B1	HRAS	RAB37	KCND1	HIST2H2BA	AL512343.2	ZDHHC15	AC092162.1	RNU6-884P
	AC005291.1	MYCBP2-AS2	PPFIBP2	PPP1R1A	AC092490.2	TDO2	CCL2	AL139352.1	MAP3K13	MUL1	TMEM60	TMEM44	AC090772.4	PHF11	DPP7	AC016582.1	RNU7-47P	AC010619.2	AC135050.3	CEP250
	AL121768.1	PKNOX1	TMEM258	AC091044.1	PRICKLE2-AS2	AC097478.4	ZFAND2B	AC063976.2	RNF217	AASDH	SH3GL1P2	MIR4429	AC093227.1	SLC51A	RNU5B-4P	PLAC9P1	TIMM8B	TMSB4XP8	ADI1P2	AC025287.2
	AC007922.2	AL031710.2	ZMYM2	MIR3143	ICK	GPR1	OR7E128P	LINC01060	MRPL57P3	HAT1	TUBB2A	AL161756.1	HIBADH	PPIAP53	GABRD	AC010175.1	TRAV4	NUGGC	DNAJC19P9	NOC4L
	GPAT4	RAI2	SLC26A5	AL160313.1	RASGRP1	GCH1	AL390243.1	ZNHIT1	GMPS	RNU6-87P	AC147067.2	AC139720.1	AC105219.1	ANKRD6	AC026150.1	IGHM	Z98752.2	AC100830.1	AC090515.4	AC068790.1
	LTBP3	TOB1-AS1	ANKHD1-EIF4EBP3	AC004678.1	UBE2M	LUC7L3	AL392023.1	UBE3D	GATA3	FRG1KP	CACNA1C-AS2	C11orf54	GRIA3	SEMA4A	ARHGAP25	AC073934.1	SMC6	CLEC9A	LINC01567	AC039056.2
	ZSCAN12	MAP3K8	SNORD124	AC097474.1	AL162231.4	FGD6	EEF1A2	AL031846.1	DHX30	ZNF592	KIAA0556	DUSP4	SMIM25	ENC1	DBP	AL356488.3	AC004540.2	TMED1	CICP5	NPDC1
	ANO10	DDX19B	MIR548V	AC131953.1	SPG7	YWHAQP6	AC092078.1	ETV3	ARHGEF26-AS1	FMR1	ODF3B	CEBPE	LYVE1	SENP6	CLU	RN7SL566P	AC022217.4	AC010451.2	AL121895.1	AC104971.3
	AC073957.1	C9orf72	AP000280.1	MED12	RNU2-17P	DGCR6	LINC00618	RNU6-436P	MTND2P28	COL4A2-AS2	YME1L1	AC024619.3	AHDC1	AC073367.1	TBX18-AS1	S100A3	PDCD10	YTHDF2	ZNF18	CTPS1
	CNN2P1	LINC01956	AC025283.2	LINC01545	AC118344.2	AL392023.2	GDAP2	EGR2	AC008957.1	IGLV2-18	AC092681.3	TRBV5-4	MAP3K1	CLEC10A	RFNG	ZNF192P1	AC100803.1	EHHADH	SAYSD1	AP001318.1
	INHBA	AC022400.7	AC092490.3	AL008718.2	H19	AC092145.1	AC117500.2	SNHG3	MEOX2	CYP4V2	SERHL2	EMP3	AC007182.2	AP001178.1	KIAA0586	TRBV6-5	DMGDH	MIR5692A1	RNA5SP92	RNU6-708P
	SLC25A6P2	ELAC1	NPC1	TREML1	AC004076.2	RRP12	AL606834.2	AL162424.1	MTMR14	SNORD121B	AL139384.2	AC084880.3	RBKS	UPP1	PDZD8	TSHZ2	AC243960.7	CTF2P	ARPC4	ADCY3
	RNU6-379P	KCTD17	KATNBL1	PCAT5	PPME1	AC020763.3	MUPP	AC011494.1	MIEN1	CHRD	DAB1	AL645929.1	CRCP	TRIM68	RAP2B	CTRL	AC109460.3	LINC02099	HCP5	AL022313.2
	MAGIX	IFNAR2	RASGEF1A	SPNS3	JCHAIN	AC097375.1	AC009652.1	IL16	AP000238.1	AC099336.2	BRD7P2	POM121B	C12orf49	PIBF1	PRDX6	ZC3H14	INPP5B	PCBD2	AL451074.3	AL133373.1
	BMS1P1	GOLGA8EP	AL391335.1	FDFT1	PCDHGB6	AC011511.5	MTCYBP2	AL671883.2	PARN	ZNF729	IL1RL2	ILDR1	ANKRD62P1-PARP4P3	MEGF9	AC069307.1	ZNF8	PLD2	HIST4H4	AC097376.2	RPL7L1
	TMED7	AC116914.1	STAG3L5P	TRAV3	TMCC1	M1AP	LZTFL1	C1orf43	ILF3	AL137067.2	LACC1	ZNF611	TMEM64	ACO2	IL17RD	SNCA	AGRN	SULT1C4	RAB6A	MTND6P22
	BCCIP	TMEM104	WDR75	ADGRE4P	TPRN	AC023509.2	AC009303.1	DHX29	AC104117.1	FAM205C	CLCC1	TMEM156	MIR8071-2	PPP1R3E	MEI1	SERTAD4-AS1	AP001107.3	AL139020.1	ZNF622	GRAMD1B
	PACERR	AC005845.1	RNU6-171P	NR1D2	TCF12	TRMT11	WNT10A	ARHGEF10L	CHKB-DT	NF2	GVQW3	ALG13	AC110760.2	LAT	Z83844.2	IFI27L1	APOBEC3B	CYP20A1	CYBRD1	AC239859.6
	RNU6-915P	AL139353.2	CENPC	TNFRSF10A	MALINC1	LYAR	LARP1P1	XPNPEP3	IPO5P1	ICMT	IL5	AC018638.3	AC083806.2	AC016559.2	SYDE2	AZGP1P2	FTH1P19	AP000943.4	NBPF26	SETP22
	CCNDBP1	AKR7A2	BRPF1	MTND1P11	NQO2	SEC61G	EPB41L1	BTG4	RAVER2	CEP131	AL117332.1	METTL2B	KRBA1	FAM186B	SMPD4	AL365259.1	SUCLA2-AS1	ERCC3	AC073964.1	IGLV3-10
	AL391845.2	AL590560.1	CRYBG1	ANO7L1	AC016876.1	LINC02510	MIR3142HG	EIF4BP6	AJ011932.1	ID3	SIX5	AC112484.1	GEMIN7-AS1	PSMC4	G0S2	RPS15AP10	AC118549.1	SCRN2	WWTR1-AS1	AC018629.1
	NTN1	SMIM2-AS1	TMEM175	RN7SL792P	AP003071.1	FUT11	AC092045.1	C8G	CPT1A	AC005005.2	TRIM50	RPL30P2	TRAV8-4	NUP85	GNG5	SMIM15-AS1	CACNA2D4	TP53I11	AC006115.1	EMC10
	RNU6ATAC31P	FIGN	CFDP1	AC011632.1	AC104534.1	TRAV9-2	NOMO2	AL162595.1	FADS1	AL441964.1	SYCE1L	MCUR1P1	RNU6-893P	TPGS1	TRAV19	TRAPPC10	KCTD11	FCGR2C	GATA5	RPN1
	AL390728.6	AC009159.2	AL731566.1	RN7SL395P	COX7A2P1	AC023794.6	PKD1L3	SNORD115-22	TRBV29-1	MIR500B	RPL12P38	MON2	AC130689.1	TXNL4A	AL583810.3	LYRM4	AC076968.1	UTP14C	PHB	SNRPD2
	AC089999.2	TUBG2	AL133264.2	MTX1P1	RPGRIP1	MKI67P1	OLFML2B	TMEM86B	C11orf98	MGAT4A	LOX	AL008635.1	PAFAH1B3	RXYLT1-AS1	MIR1179	MALAT1	AC145422.1	SCML2	PPP4R3A	LRRC6
	TEX21P	RBM14	RCSD1	RNU6-822P	RNU4-14P	FARP2	RGS17	ANP32B	RNU6-1000P	AC092802.2	MAPK3	CD63	RNU6-474P	RF00003	ZNF185	MCTS1	OSTC	AC007193.2	NBEAP3	ZCCHC17
	MFSD12	EIF3J-DT	NAPB	NFIA-AS1	PSMA7	ERGIC3	TSKU	MEAF6	PODXL	AL450468.2	USHBP1	B3GNT7	COA6	MIR4314	ARMH1	VSIG8	RNA5SP364	LINC00174	CAD	AC093816.1
	MIR6826	RERE	PGM3	AC004223.3	AC140878.1	AL133260.2	CAMKK2	RNA5SP457	ZC3HAV1L	PPFIA3	RASGRF2	MSH2	RSRC1	NUAK2	PTDSS2	FCAR	SLC23A2	TRIR	NADK2	RN7SKP136
	IGHG3	MIR374B	SNORD63	MIR558	MT-ND4	CA2	HEXB	THRAP3	DCST1	RALB	ABHD1	AC008734.1	PLA2G2D	CCDC88A	IL21R-AS1	ITK	AC092296.1	CSDC2	AC092164.1	AC093583.1
	SLC16A6P1	RNU6-787P	BCAS2P2	LIPA	GPATCH2	AC074131.1	DUS4L	DVL1	COMMD3	PANK4	CACNB3	AL512791.1	AC098679.4	RPL12P9	IGLV3-21	MIR4645	ETHE1	CRB3P1	HSPA6	MYCBP2
	CDK20	TUBB8P1	AC034198.2	CACNA2D3	AL513325.1	LINC-PINT	MRPL52	IFRD1	NKD1	AC064807.1	GPN2	FAM76B	DLX6-AS1	RPS24	PLEKHJ1	LBHD1	CCDC51	VEZT	HMGN2	AC025283.1
	IL9R	AC006445.2	ZNF542P	KDELC2	ZNF106	ZNF415	HMGB1P14	GPR62	SINHCAFP1	LCMT2	CRIP1	AC090559.1	CCDC174	LCLAT1	JPH1	AC007998.2	LINC01603	AC004877.1	ELN	IPPKP1
	PHF6	PRDX5	TCEAL9	ABHD18	PRSS46P	GTF2IRD1P1	ADAMTS12	BCL10	GGT1	Z84484.1	TRAV39	CLCNKB	DICER1	AC018665.1	SEPT14P2	AC015908.4	AC012464.1	AC010247.2	AL390774.2	ZFAT
	MOSMO	WBP11	ZDHHC7	POM121C	FIG4	CARNMT1-AS1	KLRD1	CDC20P1	IREB2	TRUB2	HAND2	RNU6-1158P	RNU4-44P	AC025627.3	DAGLA	IL36G	AC003102.1	MC5R	AC008267.3	SOWAHA
	AC104699.1	ANXA13	IGKC	RNU6-540P	LINC00836	AC087521.2	BORCS6	AL358852.1	SDF2	AL353804.2	MMD	PAOX	MIR4744	C9orf116	DPT	RN7SKP172	PITPNB	C8orf58	AC243962.1	ZNF137P
	TCN2	HMOX2	AC004223.1	MIR34AHG	AC008750.8	LINC01338	PCDH17	RNU6-422P	TMSB4X	IP6K2	DUSP14	EPB41L4A-DT	GINS2	LIMCH1	TRPS1	AC245884.4	PSMB1	AC234782.3	C15orf53	AC018868.1
	CARS	LY6H	EBF4	TRIM35	AC005020.1	PRKAR1A	FZD6	AC005722.3	RPL22P1	CMTM2	LINC02614	SNORD116-12	RNU6-960P	MME	BRMS1L	DPAGT1	ARHGEF11	LINC02390	IGLVIVOR22-2	NCKAP1L
	SNORD116-15	TRAV40	AC124017.1	EFCAB14-AS1	MIR3176	MIR22HG	AL355385.1	ALG6	AC136619.1	AC127521.1	RPL5P18	CXCL10	AC233723.1	ZNF831	AC011944.1	EBAG9P1	OR2A1-AS1	LINC02132	SOCS4	AC015849.4
	RTEL1	ENOX2	AC055876.3	MIR10B	SNORA13	REEP6	AC073593.1	MMP2-AS1	MRPS16	RPS9	TANK	TRBV7-9	PPIP5K1	PMS2P6	AC007365.1	NMD3	RALY	AC134698.4	AL590438.1	NLRC3
	AC084018.1	SLC16A9	GPX8	BCL2L13	BCL2L14	GM2A	SMCR5	AL606534.5	TRAT1	HCG15	RTL6	MAPK11	FAM161B	AC002543.1	SNORD116-18	CCK	MICAL1	FMO4	BTNL2	AC026954.2
	CBFA2T2	NUDT14	UIMC1	AC105384.2	SERINC4	ZNF7	SNRPD1	LRRC2-AS1	WDR33	CAMK1	ACBD4	RSPH9	PTPN20CP	SMOC1	SNORA70B	EMC1-AS1	ACTG1P1	TPRA1	HSP90AA5P	ANKS1A
	TIPARP	AC126389.1	GRAMD4	OR13C2	SDCBP2-AS1	STX5	CA3	AL645939.1	KCNMA1-AS1	GPR171	AL390955.1	AC092338.2	MIR3197	IGKV3-11	TMEM91	AP003072.1	GEM	MTATP6P16	ATP5PFP1	FXR2
	OIT3	AL121890.1	LPIN1	DDX52	RN7SL567P	UQCR10	RNU6-1035P	ASB9	UQCC3	AC092755.1	AC020911.1	TULP2	RILPL2	AC018737.2	TRAV1-2	NECAB3	RWDD4	AP000350.6	EIF4E2	CLEC4GP1
	FNDC8	HMGN1P8	RNU6-945P	C6orf58	AC012467.2	RF00157	ZDHHC1	ACTG1P3	C20orf144	AC008840.1	PARD3B	ZNF43	DEK	AL031055.1	AKAP8	AL355336.1	AC134775.1	RAB2B	AP001257.1	LINC00870
	TMSB15B	ABHD11-AS1	CCDC151	PAK6	AC004264.1	CCR2	SELENOM	GALNT16	LRRC73	AC027544.1	LMO3	SPDYA	LINC01998	SPIN4	AC008438.2	AC005899.8	AL390755.1	EDRF1	ZNF554	WDR86-AS1
	AC121493.1	AC011500.3	RN7SKP23	AC007879.1	HAUS6	KIAA0319L	ZNF439	SEC24C	TIFAB	AC092338.1	ELN-AS1	PLEK	AL032821.1	BLMH	FCRL6	AC055822.1	AL121894.1	PGPEP1	AC090204.1	PAN3
	SEPT9	MMADHC	LINC01546	LAMTOR4	CENPM	RN7SL733P	P2RX5-TAX1BP3	LINC01632	LINC01354	CD99	NAGA	NAA15	AL360169.1	INPPL1	SLC15A4	VDAC1	CT45A11P	AC025647.1	LARP1	GSTA10P
	ME2	AL357507.1	AL137024.1	Z83843.1	RNA5SP382	AL049552.1	DPH6-DT	NECTIN3-AS1	CFAP73	SLCO5A1	AL096803.1	ABHD17A	KIAA0355	DLSTP1	MKRN5P	IL33	ITGA6-AS1	TUBB4A	MLH1	ZIC4
	BBC3	LOXL2	GCNT4	C14orf180	AL009174.1	TRGV7	ARMC10P1	AC012254.3	BCAP29	PPM1K-DT	NDUFAF4P3	SNX5	STK38	AC135050.2	ZCCHC18	CCR7	AL606760.3	AL096701.1	TFEB	HUWE1
	MFSD8	IGHGP	AC007384.1	AC104819.1	RPL23AP75	GMEB2	ENPP7P1	TRAV20	PLEKHF1	AC021106.2	ZNF830	AL031283.3	SCNM1	NBPF1	DNAJC18	PRC1-AS1	AC011897.1	KLRB1	KCNA3	TUB-AS1
	RPS19	AL358115.1	IGHA2	AC117395.1	AC004890.1	UNC5C	AP002364.1	TMLHE-AS1	RMND5B	TMEM182	LINC02600	AC002091.2	PWWP3B	ARNT	CTRC	BMI1	LAMC1	FLT4	AC091133.5	ZNF81
	IGLV2-23	AC104333.2	AC011497.2	DCPS	CCDC170	ZNF630	PLXNC1	TOB2P1	TULP4	MTX2	RN7SKP173	AC020907.3	AL121992.3	AP000692.1	CLEC2D	AC053503.5	HSPE1P23	RPIA	AC089987.2	AL158212.4
	INSL3	PDE9A	BMP7	LAMTOR2	RNU2-7P	GTF2IRD2B	ZNF587	FAM86B1	SEPT7P8	RARRES3	RANGRF	MAL2-AS1	AC104211.1	ANKHD1	HSPA8P19	RNF185	AC111170.2	PPARD	AC011374.1	NR2F2-AS1
	MTMR9LP	IL6STP1	AC093278.2	AC112907.1	C1QTNF6	MIR302D	SNX18P12	AL157400.4	AC131902.1	XKR6	KPNA2	CCL22	AC102953.2	AC020934.2	MGAT1	PDGFRB	BRPF3	AC078899.5	FAM86HP	AL731567.1
	AL118508.1	LINC02526	AL365194.1	AL031123.2	AC016746.1	CSRP2	EMILIN2	ARHGAP21	AC092755.2	AC012555.1	AC009831.1	MIR29B2CHG	IFNA20P	AC103591.3	AC104984.6	GTF3C5	SERPINH1	HNRNPK	RN7SKP16	HINT3
	C19orf84	PHKA1-AS1	RPS28P8	DYNLL1P1	HOXA1	RF00092	ZNF322	RNU6-516P	MIR361	TRAV13-1	FAM32A	NDUFS3	TRBV7-6	TAS2R20	KCNK7	B3GALT1	RNU6-1053P	USP17L7	AC096533.1	MIR760
	AL592490.1	IGKJ5	RSL24D1P2	AC027682.1	ROMO1	DIRC3-AS1	ZNF610	AC007878.1	RPL34P33	PRMT1	SLC2A3	ECH1	MRPS7	AL020997.2	ACTG1	SMG8	PRDX1	UBE2L6	SPIB	SEPT2
	IGHV3-11	NBN	AC136475.3	ZNF677	AC106796.1	STKLD1	AC140479.2	RPL32P1	MIR6806	FAAP20	LINC01165	SOX7	AC073342.1	RNU7-130P	SNORA58B	LINC002481	CYP51A1-AS1	CCL19	RNF214	POLB
	Z97634.1	A2M	AC244453.1	AC103858.1	ENPP7P10	OSBPL1A	POSTN	FTH1P22	ADGRL3-AS1	AC006272.1	AC087235.1	HPS1	AC087741.1	AL078601.1	TNRC6C	TUBGCP2	SYT2	C16orf86	AC127024.4	AC015849.5
	APOBEC3A	HNRNPA1P59	PDIA4	AC016769.1	AL353740.1	AC107956.1	SS18L2	PHACTR2	AL359220.1	WNT11	S100B	ROR1-AS1	AL450326.1	IGLV1-36	FAM120A	AP003774.4	SNRPG	SYS1-DBNDD2	AC008443.4	NOTCH4
	FPR2	AC079340.1	INSM1	AL391883.1	PRELID1P1	CLEC4D	ECI2	CDKAL1	AC093908.1	XIAP	AP003108.1	KRT18P34	CLEC14A	AC099524.1	TRGV2	SNORA33	AL162385.1	AC008440.1	NTHL1	AC005954.1
	MIR4768	MIR5587	AC010976.2	SHCBP1	CXCL11	GRHL1	MKRN2OS	AC121161.2	MT-CYB	FABP7P1	ZNF33B	AL353807.2	GRK6	FIBP	AP000436.1	RPS10	TRMT61A	OR7E2P	AC098826.2	DPEP1
	CLK2	STRA8	MIR4453HG	AC135178.2	AC009779.3	PHYHIPL	NGFR	ADPGK-AS1	AC005786.1	MOB1B	AL513329.1	PTOV1	MEIS3P1	AC131159.2	SAPCD1	OSGEP	RAB18	SMAD2	AC009093.2	RNU6-818P
	DDX11L2	RALGPS1	TRIM73	HCAR2	AC020658.6	LINC01151	KIAA1147	AC020763.1	AC078828.1	CANX	HNRNPA3	AP001284.1	AP000640.1	MKX	KLHL7	AC008080.1	MYSM1	SLC44A5	ATXN1L	SVBP
	AC010632.2	C19orf38	CIART	KIR3DL1	FDCSP	AP001086.1	AC024568.1	AC114982.1	COMMD1	AKT3-IT1	AC233701.1	TPD52L1	PHF19	AC092295.2	AL157385.1	ERCC5	SLC2A11	ZFPM1	INKA2	PRICKLE2-AS3
	LINC01413	RN7SKP167	AC078980.1	SIRPB1	TBCA	IFNGR1	SLC22A20P	NBEAP1	AL357568.2	AC110794.1	RAB11B-AS1	RARS	RPL21P54	AP004371.1	AC093702.1	AC073569.3	MIR3151	DERL3	SLC18B1	SSX2IP
	CDK17	CRADD	RABL6	AC005410.1	RNA5SP498	AC027309.1	STAG3L1	CHKA	STK24	OLFM1	PPP1R10	RNU2-51P	AL353689.1	VAX2	WDR43	ESYT3	DTX1	TRAV13-2	AL592435.1	MRPL54
	NUPL2	MIR1180	NEFL	IGLC2	TPM3P3	AL356417.1	TLR9	AC020763.4	FSCN2	AC008149.1	COMMD5	AC003682.1	LNP1	SMPDL3B	TMEM184B	AC005534.2	MRGBP	PCGF5	NHSL1	MTATP6P17
	ATP6V0E1P3	FNDC1	AL136115.1	LINC01337	AP000879.2	AL589182.2	TENT5B	SRPX	AC073316.3	AC020558.2	AC114402.1	AC008088.1	AL136988.2	PTP4A2P1	TRAV25	AC010809.3	MIR4715	AL023754.1	CNTNAP1	WHAMMP3
	AC011742.3	RN7SKP287	DCK	FRYL	RASL10B	LINC02574	MTDHP5	PORCN	LINC00683	EIF4EBP2P2	TNKS2	TRAF4	RNA5SP490	AL139246.5	AL773524.1	SNHG25	AC007365.2	B4GALT4-AS1	AC120498.6	MTCO1P20
	IGKV1-27	C1orf94	TMEM132A	ADAR	TBATA	AL049844.1	AC067817.1	PODNL1	AC087386.1	HM13-IT1	AC091182.1	AC015969.1	TTC39B	RN7SL762P	CLEC3B	AC025449.1	STH	TRBV30	TBPL1	NDUFAF2
	CFL1	AC093535.2	C22orf24	LINC01934	NADSYN1	RN7SL570P	FCF1P2	ZNF571-AS1	LRRFIP2	CDK18	DCHS2	KCTD9P4	MEG3	LINC01515	LRRC3C	AC008114.1	DOHH	CDC27	GNPTG	MIR6757
	EMC3-AS1	RNU6-722P	LINC01806	VPS41	AL139400.1	RPLP0P11	AC067852.2	PDGFD	NBPF19	GPT2	SRP9	TRAP1	AP003498.1	DOK5	AC026271.1	RPS29P16	FAM178B	FBN1	VSIG10	AC012377.1
	AC093668.2	KCNN4	SNORD15B	AC005351.1	SAP30BP	AC011890.1	SERPINE3	AC133065.3	MYLKP1	AC074143.1	ATP6V0E1	PARP3	ZNF730	TAS2R4	ZNF662	RN7SKP123	LINC02453	LINC01888	CNTN4-AS1	JOSD2
	ZMYM6	LINC02446	IGLV7-43	PTGDS	AC010900.2	MIR4420	AC006252.1	NUP160	AC092687.3	AC093520.2	AL352979.3	RIC3	RNU6-1289P	ACSM3	GSDMD	AF038458.3	ADGRL4	IGHV3-73	TALDO1	AC025437.4
	AC096751.1	MRPL10	CAPG	RNU6-850P	TBC1D3L	AC018695.7	MSANTD3-TMEFF1	AL133467.1	AL355864.1	AC007362.1	AC011447.3	AL136309.2	RPS10P2	KRT18P39	SMUG1	RN7SL535P	SELENOO	SNTB2	SSXP10	PANK3
	SH3GL1	ZNF826P	AC234782.1	RNU6-658P	AP000365.1	SEC13	GTF2IRD1	TAS2R15P	NBL1	IGHV1-18	SLC4A5	IGLV2-14	AC124248.1	AC020910.3	TRDN	LINC02210	AL356580.1	DLK2	UCKL1	CABYR
	KDM7A-DT	SLC22A18AS	SNORA15B-2	RF00017	RPL23AP32	AC022973.1	HCG20	CBR4	GADL1	AC025627.2	HSPA2	AL158837.1	MFAP1	ZNF214	ISCUP1	AC119674.1	AL356776.1	CD207	AC010480.1	AL137246.1
	ZNF624	POP5	FER	LINC02182	RPSAP18	IER5	RNU6-702P	AL136968.1	AC104241.1	LINC00028	SPATA20	AL589743.1	AL603756.1	YEATS2	TRAV8-2	QRSL1P3	UBXN7-AS1	RNU6-1206P	ST20-AS1	TOMM20
	ZFC3H1	FKBP3	WDR49	TPST1	LINC02544	CEP170	AC244669.1	AL139241.1	AC087499.3	C19orf24	SDHAF2	AC073136.2	LIFR-AS1	AC105271.1	AL021707.3	FLVCR1	AC009974.1	AL645922.1	VRK2	DAXX
	UTP11	ZDHHC19	FTLP12	GCN1	AC244021.1	TRAV6	TRABD2A	AL391832.3	MR1	TNC	NFRKB	NTN4	AP000769.3	CARMIL1	MIR4782	IRF4	SHROOM1	PTPRH	DIS3	AC005154.2
	BDH2	SMTNL2	AL390866.1	ALG3	TRPC4AP	BNIP3P8	DAZAP1	KCNC3	PAK5	MGAT5	LSMEM2	ZDHHC18	RGS9	LPIN2	AC006254.2	NLRC5	WWC2-AS2	GOT2	RNU1-16P	AC103760.1
	AC092692.1	AC241952.1	CWC15	GPR35	LINC01087	RAB10	AC107982.1	VN2R10P	AC138951.1	RPS2P55	AL731568.1	PTGS1	AC005009.1	AP002954.1	PSMC3IP	AL355353.1	INSIG2	RPL36A	AC008737.2	PRDM15
	ANKIB1	GPR75-ASB3	AL354696.2	IL18BP	AC080038.2	MBLAC2	TH	AL031727.1	LILRP2	AC009090.2	AP1S1	TMEM78	ZNF132	BTG1	HMGB1P8	SREBF2	FAM20C	INTS8
AvsD	IGF2BP2	HMGA2	IGF2BP1	IGF2BP3	MIR497HG	WDR43	AL049543.1	PLAG1	GOLGA2P7	SLC6A15	TMEM41A	ETV1	PLAGL2	BNC1	LRPPRC	SENP2	HOXB9	AL023775.1	AC006058.3	HOXB-AS4
	CCND1	SLC35G1	EML4	MIR196A1	DLX1	GOLGA2P10	LIN28B	HOXB13	GAS2	RRS1	RGS20	AC006058.1	ARFGEF1	MCFD2	C17orf49	GTF3C2	AC093010.3	STEAP1B	KTN1-AS1	AL162411.1
	AC090673.1	VAX1	AC006058.4	WDR12	ANKLE1	LINC02037	AC103702.2	LINC00513	COL13A1	FOXG1-AS1	DCAF13	TGS1	SLC5A4-AS1	RAET1K	SPRY4-AS1	SLC30A6	FILIP1	UBE2E3	SNHG16	SELENOI
	PLA2G4C	POP1	PDCD11	DUSP7	TRIB2	CPSF1P1	AC009486.1	TSPAN5	AC091133.2	RPSAP52	RF02133	CHD7	CAD	SPRED2	YEATS2	CEBPZ	LINC01844	LYPLA1	ISL2	CDK5R2
	NUDCD1	HSPB8	AC005592.1	TSPAN6	DBNDD2	NUP35	AC091133.4	FBXO24	DHX57	NIP7	UBASH3B	FSCN1P1	SLC25A24P1	AC064875.1	CCNJ	RNF2	ADAMTS7P4	BCL6B	UBE2Q2P2	SCAT8
	SERPINB7	NCL	GADD45G	RAD54B	NOC3L	AC092957.1	SLC5A6	AL359643.3	LINC02282	AASDHPPT	YPEL3	SLC19A1	OR2M4	AC012123.1	NCBP2	AC113355.1	CDX2	SQLE	ZFHX4	HSP90AB2P
	NBPF4	ULBP3	IGFBP7	BMP5	VIRMA	ETV5	ACP1	TAF1A	RBM28	PRDM13	ALX1	DPY19L4	CDK6	ETV4	CMAHP	MTNR1A	EIF4G1	ATP7B	C1orf53	HOMER2P1
	MPP6	LINC02454	PRAC2	FASN	EVA1A	ZNF695	NBPF6	RFPL2	DDO	AC114803.1	POPDC2	OLFM3	SEMA3A	POLR3A	B3GALT4	TMEM151B	NEURL1B	GBP2	KLHL14	LINC01967
	AEN	SAR1AP1	KCNQ5-IT1	TINAGL1	PUS7	ARHGEF10L	SPRED1	LMOD1	PCDH9	PDIA6	HEATR1	AC005077.4	CSPG4P10	HSPD1	FSTL5	HOXD13	DMRTA2	HSPB2	LIMS2	SMAGP
	OTUB2	PPRC1	PPP1R14A	POLR1B	PRTG	TWNK	TAGLN	AC006058.2	MATN3	CRYAB	AOC3	GSN	WNT3A	TBX3	DUSP4	PTDSS1	MEMO1	ERLIN1	SLC25A15	ZBED9
	IL6R	AP000526.1	MKRN3	MARS	ANO7	CNIH1	EZH1	OR1F1	KIF3C	CSPP1	COL26A1	CBARP	KIAA1549L	WNK4	BTN1A1	NEK6	AC099518.1	FOXA2	BMS1	AC019069.1
	HACD3	TMEM68	CLCN2	CACNG7	DDX21	SCD	INTS8	SPRY4	F2RL1	AC002076.1	TAGLN3	UTP18	GAPDHP14	AC139426.3	NOLC1	AL009179.1	AC021876.1	FZD2	SH3BGRL	PLPP1
	YTHDF3	ESPNP	ZBTB7B	UTP23	ALDH4A1	MYL9	PIGF	SYT13	TP53INP2	LMNB2	TNFRSF10B	HSP90AB1	HAS2	CBX7	INKA2	LINC01694	CCDC86	NUFIP1	N4BP2L1	AMY2B
	SEMA4F	TMEM87B	ONECUT2	ZDBF2	AC007128.1	DLK2	LDLRAD3	STX1A	AC012574.1	INSYN2B	FOXG1	AL662890.1	HEATR6	GLDC	ASB16-AS1	VGF	PRKCI	A4GALT	PABPC3	WDCP
	AL139023.1	CAMK4	IL1RAP	PRSS16	TOP1	AC087289.1	HOXA1	DHX36	COX7A1	DCAF4	PLPPR3	LINC00888	PYCR1	FAM171A1	HSP90AB3P	SERINC2	ITGA4	CNIH3	NPR1	AC002351.1
	PAQR9	HIPK2	HMGA1P1	NOL10	BICC1	SYNPO2	RNF182	LARS2	CDH7	PBX2P1	SLIT2-IT1	C11orf96	HMGA1	NOTO	LINC01896	SEMA7A	RRP1B	CCDC88A	CYSTM1	MIR138-1
	AL121932.1	DLX2	TTLL7	G2E3	ADPRH	GCC2-AS1	ZNF146	EIF2AK4	TFPI2	MINPP1	IL3RA	TNFRSF10D	LYPD8	IGDCC3	C14orf39	ZC2HC1A	P4HA1	SALL3	LINC01385	TUBB3
	MAGEL2	LINC02657	TET1	SOSTDC1	NOP2	TFAM	CDKN2B-AS1	SLC7A10	AC044860.3	SPRY2	WDR3	SMOX	E2F5	AGGF1P2	FIRRE	ACTL6A	AC096537.1	LAPTM4B	WNT5A-AS1	INA
	MYOM1	SMARCD1	MGST2	SLC27A3	LINC00630	ARID5A	SLC35B4	BZW1	AC141586.1	EDN3	AC092685.1	AJUBA	IMPAD1	HNMT	PPAT	AC244394.1	PARM1	AC243919.1	PCNX4	ASB2
	E2F6	MORN3	AC104066.1	TMEM41B	AC011374.2	IL33	FBXL21P	LIMK1	PPP1R12B	AC079949.1	SELENOV	GNPNAT1	RNF216P1	CNNM1	PIGH	LINC00632	STOM	AC002524.1	RNASEH1	ZNF763
	FMNL2	AC018641.1	TDGF1P7	FGF7	SSBP2	RUNX2	AL136987.1	SHMT2	NBN	DLX4	CHRNB2	ANAPC1	RRP15	CRYGEP	WBP11	IGF2BP2-AS1	BTG2	HGH1	HAS2-AS1	RTKN
	AC108025.1	AC126407.1	GJA4	NUMB	RNF24	ABCF3	TICRR	AL356740.1	ESAM	ATG16L2	AL021920.2	FABP3	IGLON5	DEPP1	FIG4	FGF5	ZNF280C	LINC01399	SND1	A2M
	HK2	HNRNPC	QSOX2	ANKRD28	MYH11	B3GNT8	NUP205	AC090578.1	MEX3A	BEND3	AJ003147.1	AC007128.2	MCM10	AC005336.3	CPOX	DLX2-DT	POM121L2	MIR621	CDC25A	COL2A1
	ALDH3A2	PNPT1	ARHGAP1	STMN2	TPBG	ZC3HAV1L	JARID2	AC113192.2	FAXDC2	LINC00973	FKBP14	SH3GLB2	TTPAL	CASP17P	STIP1	CBY1	NKX2-4	CYP4A22-AS1	ATP6V1B1-AS1	TNPO1
	NMD3	OTX1	DDX1	RASL12	PRUNE2	FARP2	UBE2B	DNAAF2	AC090023.2	SLC16A9	AC016831.1	BLNK	CPSF1	KLF2P1	CCDC27	EARS2	WWC2	MRPL19	ALG8	MTIF2
	OTOR	PTPN9	TTYH3	YES1	PEX11G	WDR45	MAP4K4	ZNF391	BX322639.1	DTD1	NCOA7	ATP11B	AC044860.1	MIR4262	UBA52P6	USP46	AC078993.1	C6orf120	FJX1	VRK1
	MOS	AZI2	CSRP1	ADAM15	BOP1	AP005233.2	ACTA2	MSH2	SLCO3A1	PLN	WNT5B	LBX2	RF02132	CMTM8	GPHN	FAM19A3	WDR4	LINC00941	AL008723.2	FCMR
	NAGS	MMRN2	RCOR2	C2orf69P1	HMGB3	ZNF623	HMGCR	CYTL1	TRIQK	C5orf56	PRR16	CLU	PGPEP1	ZNF696	GGH	IQCD	CDH12	MSH6	VWDE	DKC1
	DPF3	AC084262.1	RBM4	AC104779.1	MTREX	TSPAN15	TMCO4	SRBD1	RBM12	PKIA-AS1	DPY19L2P4	ACBD4	GLIPR2	PCOLCE-AS1	EIF2B5	FAM171A2	MYEOV	ZHX2	TIMM8A	MIR3125
	PRAC1	AUNIP	DEFB126	LINC02036	EPM2A	FOXN3P1	AP001625.1	RBM38	GPN1	AL500527.1	SELENOM	CSRNP3	TSPOAP1	TRPA1	OFCC1	MPC2	PSMB8-AS1	PMP22	URAD	OPTN
	TOP1MT	OSER1-DT	ZNF697	NDC1	AC008708.1	MRPS28	RAP1A	OPA1	BZW2	INSR	IL4R	BTRC	ACVR2B	ZNF844	NME1	ZFP36	CCNK	PNPLA3	APOLD1	RAD21L1
	PABPC1L2B	ZFP64	GTF3C3	SMR3B	LSG1	PRKAG2	PABPC4	HMCN2	WDR35	COL11A2	ZNF804B	AC103808.3	CHRNA5	LINC02249	44257	PHYHD1	EYS	AC112721.2	ISPD	TDP1
	TENT5C	INAFM1	TAS2R2P	AC025419.1	BIRC6	TONSL	USP42	NKRF	SKIL	TMEM80	AC008060.2	PTPRG	BPIFB3	KLHL7	RASL11A	SLC9A7	ADARB2	SYCP2L	SPAST	TNS1
	AC009804.1	NDNF	ZCCHC3	GRPR	AC046143.1	FOSL1	CEP170	HMG20A	CADPS	LDAH	EVA1C	AC037486.1	AC073130.1	AC091173.1	CHI3L2	AC069277.1	CEP128	CNN1	SLC35B1	BTF3P2
	LINC01731	VSIR	CCT4	KLF14	CASZ1	CYP51A1	DTD2	UTP20	NLN	LGR5	DNAAF5	CCT6A	ZNRF3	AC093627.1	CPNE3	TRAPPC2	AL358852.1	KIAA1549	ZSCAN2	SOX11
	AC011773.1	VPS54	HSPH1	CCDC138	CENPVL3	LINC02056	JKAMP	NIFK	AC008443.3	DLL3	SCUBE3	UBE2O	SLC25A24P2	RIN1	AL662791.2	SOD3	FBXO32	FAR2P1	ATRN	ALG3
	FHL1	MRTFA	TFAP2A	ACKR1	AL662844.4	PRKN	XPO5	BOLA2-SMG1P6	TCF3	AL772337.3	MRPL15	PABPC1L2A	TMEM47	LDLRAD2	PHF6	CTAGE3P	PFKFB4	AC104463.2	SPINDOC	BRAF
	PIFO	GRAMD1B	DDN-AS1	PRSS3	HCG18	PRELP	GOLGA6L9	CLNS1A	SIX4	ME3	AC107308.1	ISCA2P1	TRAM1	DSCC1	SHROOM2	VAMP2	SH3BP4	LINC00189	PRKDC	TFB2M
	LINC02057	AC004969.1	CSPG4P12	CRAT	SLC25A21	AL360270.1	PAK1IP1	AC025437.1	PARD6A	LINC01354	ANKRD46	COX7A2L	CENPO	CNPY1	F11-AS1	TMED10	PRAME	SIM2	LINC02672	DNA2
	AC226118.1	TGIF2-RAB5IF	TNFRSF19	AC103808.1	FAM167B	PTBP1	AL390066.1	NPM3	MIR3681HG	AL135910.1	BARX1	MGST3	AC040977.1	MCRIP2P1	AC004067.1	RRP12	ORC6	CDKN2B	ZBTB33	SH2D5
	ZNF138	DDIAS	RARRES2P2	MIGA2	PNRC1	MTBP	ADO	KLF9	ARID3A	AC011298.1	BAZ2A	SLC7A6OS	WDR89	FXR1	KCNMB1	MIOS	AP001542.3	MAMDC2	LINC01386	ZC3H15
	RASD1	C6orf203	PRKD3	LINC00533	RAB9B	SLFN13	GPIHBP1	CHRDL2	DSCR4	PROK2	AC005336.2	LINC00543	KCNK2	TRIM36	MESTP1	PHF14	AL132709.1	MED6	ACADS	LINC02188
	FBXO11	ILF3	DIPK1A	TAF1B	GOLGA2P5	SNHG1	GPR142	SCN1B	AC015468.3	NBAT1	ATG4A	TET3	CT45A3	AL158013.1	AL121949.1	TLX1	LINC00638	AL096865.1	RFT1	MIR3663
	CTR9	VAT1L	AP000892.3	ZNF670-ZNF695	CCNYL2	BLM	TFAP4	AL021707.8	ATAD2B	F12	DNAJC6	ITGA7	HERC2P10	HSD17B14	AC074237.1	SEC23IP	FNDC3A	AC116609.1	CLDN12	SFPQ
	MME	ACTG2	NATD1	JPH2	BLACAT1	PROKR1	SAT1	MAP3K14	VARS	HIGD1B	GTPBP4	NAT10	SLC2A8	RELB	AC005865.2	AC108025.2	RHOXF1P1	FAM91A1	AL157786.1	TBR1
	RN7SL208P	HPDL	RARRES3	PTK2B	TRRAP	FBXW8	FBN2	ZNF215	KCNS1	CLEC14A	MRGBP	SLC7A6	AC003092.1	NTSR1	NKX2-6	PAPSS1	ADAMTS20	PALMD	KIF15	AC012123.2
	CSNK2A1	MPHOSPH10	AK3P3	TNFSF12	CREG2	PRR7	AGO2	WDR45B	RPS15AP38	LECT2	BNIP3P1	HSPD1P5	AL022324.2	TMEM185B	WDHD1	RBPMS	RAB9A	AL929601.4	PIN1	PBX2
	ARHGAP39	SPARCL1	VSX2	EIF2AK1	ACTR3B	RARRES2P1	AC007285.2	SPATA31C2	AC025884.2	MTND4P4	TMEM273	LINC02200	FOXI3	IRAIN	XPO1	CCND2	HS3ST3B1	AC090833.1	MEAK7	ZBED4
	AC007938.2	SFI1	HDLBP	SLITRK1	GNL3	PTP4A2P2	NKX3-1	SLC25A25	NAV3	USP2	AC073046.1	C16orf87	POLR1A	NUP93	PCDHA6	AL358473.1	LINC02113	S1PR1	PDX1	SLC4A1AP
	EBPL	ACTA2-AS1	TMEM145	ZFHX4-AS1	AC083862.2	HS3ST3A1	FAM98A	MAGEB2	COX6B1P2	LINC00682	WIF1	PWRN4	RINT1	MYCT1	OPRD1	AF121898.1	HECW1	OR13Z2P	CCDC28A	FOXK2
	SLC25A5P5	NOL6	SEMA3G	MEGF10	CBR3	FILIP1L	GALNT17	TSPAN18	LINC01776	WDR75	LINC02438	AC007285.1	PIK3IP1	MBOAT2	AL159169.1	VMAC	AP001626.1	RRP9	RAB33B	TTC39B
	LINC01162	XKR7	MEN1	ZER1	PRPS2	PRMT5	CRYGD	RARS	DNAJC2	ELF2	AL162384.1	AC027243.2	TMEM159	MKRN9P	AC114811.2	TCEAL1	NXPH3	PNO1	MIEF1	MAP3K7CL
	AL137803.1	FAM90A28P	PPIL1	ILF3-DT	GPX5	ABTB1	AP002956.1	TCP10L2	TBC1D25	NUP98	GCNT4	ZNF195	KLLN	NPM1	UBXN7	PROSER1	WNT5A	MAN1C1	ZNF202	FKBP1B
	HLA-F	MESTP3	HAGH	PAICS	CDH11	MOB3C	RMC1	MEMO1P1	FSCN1	FEV	PBXIP1	WDR45BP1	POFUT1	SHISAL2B	ENTPD7	ECE2	MBNL1-AS1	DIPK2B	LINC01419	AC018616.1
	ARHGEF37	PABPC1	RGS4	MET	IDNK	FLOT2	TSPOAP1-AS1	AC027243.1	ZDHHC9	NUDT18	ZNF485	NINJ1	USHBP1	CLEC11A	HOXB8	AC011700.1	AGGF1P1	ALDH18A1	SF3B2	SPATS2
	NOTCH4	AC244102.1	ULK2	GCSH	ATP2B1	AF241725.1	NME1-NME2	LINC00680	ERVH48-1	MRVI1	MFGE8	MCOLN1	AP002852.1	AL445231.1	AC079949.2	AC006942.1	TCEAL3	CAMKV	GUCY1B1	SOD2
	AC133552.2	GRIPAP1	CAVIN2	MAP3K8	ITGA10	ASPA	GPAM	FBXL5	BVES-AS1	AC108136.1	MAP3K6	ELAVL4	DUSP22	GTF2IP7	TMEM65	NPM1P39	OR5BH1P	RNF14	TM9SF4	FRY
	HIST1H4C	GLCE	AC090152.1	TRIP10	BACH1	NOP58	KIF18A	YRDC	TSPAN11	PUS7L	NPM1P25	LEMD1	LINC01415	AC025031.2	EDC3	PTCD3	CHODL	AL157996.1	RYBP	AL034405.1
	RCBTB1	TCF12	GXYLT1	AC090099.4	MRPS31P4	URB2	TPM1	FKBP7	SERTAD2	EIF3A	AFF2	AC104825.1	PINLYP	VASP	BCL11A	ENOX1	AC093278.2	DCUN1D1	MICAL1	EIF4EBP3
	SLC6A3	RNASEK-C17orf49	NOL11	AC116003.1	ATP8B4	AC025588.1	AC009159.3	OR10Y1P	IPO7	ZKSCAN1	LINC00311	AL591895.1	GDNF	HCG27	RPSAP7	BLVRB	NLRP11	NARS2	HEPH	FOXC2
	NPM1P27	DNASE1L3	ALOX12B	AC016831.3	Z95114.3	NF1P10	STEAP3	CRISPLD1	DLG1-AS1	HNRNPU	AC005180.2	ABHD17AP4	LRMP	PCAT6	CNOT3	AC090023.1	C1orf54	USP10	ZRSR2	PLEKHH1
	GPT2	AC004221.1	ZBTB34	NIF3L1	AC099560.1	HELQ	USH1C	CUL4B	MTFR1	AKIRIN1	PEA15	BNIP3	PTPN18	AC084880.1	UBXN2A	NHEJ1	APOL2	ECHDC2	IRX2	TRMT61B
	MIS18A	OLA1	TRIM27	DOCK9-DT	ERG28	MIF4GD	RNF2P1	HNRNPCP2	SMILR	NACC2	AC013470.2	ASMTL-AS1	GMFB	NSMAF	DKKL1	WASF3	CU104787.1	HES4	RAB3B	AC087651.1
	MNX1-AS1	CDKN2A	HNF4G	HADH	ICAM2	AL590079.1	EN2	PECAM1	MMD2	CHSY1	DDX18	TBC1D17	MKRN2	TP53TG3	PDGFB	MOCS1	ZFAND1	TMED10P2	LINC00839	FNBP1
	TANC2	FBXL22	RHOB	CHCHD7	KMT2B	DUSP8	AL512310.11	SPDL1	LHX9	NFIC	AC245100.3	TRPC7	TPRG1	PLIN4	PSTK	SMTN	KCNIP1	BMS1P17	RGS5	ALG11
	RAP2C	PCDHA2	FAM3C2	LINC01807	LINC01145	EFNA2	PGAM1P7	LINC00613	CSNK2A2	IMPA2	SAP130	CLEC3B	PLA2G4C-AS1	CA8	LINC01425	AC080112.1	FMO4	LARP1	GFPT1	CASKIN1
	LINC02086	SACM1L	STBD1	PCDHB8	AC005064.1	KLRC2	CEP170P1	AL645608.2	KRTAP21-1	CTH	AL158206.1	FAM76A	PCDHA1	TFEB	GRID2IP	DUS4L	ARMC1	KCNMB2-AS1	UBE3D	AC067863.2
	HJURP	ISCA2	TEPP	TYW5	CCDC159	MBD6	PSMD2	FAM163A	LINC00578	FO393418.1	MAGEC1	SELENOW	MCUB	HSPD1P1	ATXN7L3	PHF20L1	PLEKHA8	LAMB2	MYLK	SMIM14
	HMGN1P36	AP000870.1	WDTC1	SRSF9	DHX33	MT-RNR2	AL031658.2	PRKRA-AS1	ECSCR	SLC25A32	GPR183	SP3P	DARS-AS1	POU4F3	DSTN	FANCF	INCENP	MID1IP1-AS1	DHX37	SLIT2
	AC009139.1	G2E3-AS1	KLHL13	FKBP4	LRRC36	AP001646.2	C16orf86	RASA1	HMGA2-AS1	ETFDH	RN7SL3	RIBC1	PLUT	GSTCD	HLA-U	OLA1P1	HMGCS1	PRDM11	YWHAH	TAPT1
	JAG1	GUSBP12	TMEM171	NOB1	MIR548AQ	ERMP1	RBMX	AL117329.1	CLTC	GLDCP1	HNRNPA1	KIF20B	P4HTM	RP1	YLPM1	RTKN2	MAOA	CYP26A1	FEZ1	PHF2P2
	HNRNPLL	TRAF5	SELENOOLP	RBM12B-AS1	NPHS2	LINC02324	PLEC	SSR3	AC006206.2	AC093536.1	AC025181.2	COX4I2	APOL3	INTS4	C1S	TMEM175	CX3CL1	ZNF678	MPLKIP	SLC12A9-AS1
	IGF2-AS	CBX3	LOXL4	PAPOLA	RNA5SP481	LRRC59	TMEM209	UHRF1	GDPGP1	AF001548.1	TMEM67	REST	NDUFC1	TPTE	IPO8P1	AL132765.2	SKOR2	RNF44	AL391152.1	MMS19
	AC027607.1	IL12A-AS1	UTP14A	GIMAP1	DUSP9	XYLB	POTEF	ALDH9A1	BMS1P8	TMEM140	CNOT6L	IPMK	RASGEF1B	ZWILCH	ZNF724	ARL6IP6	AC138430.1	ACSM5	COX11P1	PLA2G5
	SLC17A6	CCDC81	FABP5	AC243428.1	DCDC2	MAP4K3	CCDC153	TM9SF3	MIR181A1	SINHCAFP2	RERE-AS1	CT45A1	TMEM63C	DDX10	MAIP1	PROX1-AS1	TMEM249	ZNF438	KDM5B	APH1B
	BTBD1	AL606760.2	ZNF700	SOCS5	AL445250.1	LINC01224	OGFOD1	SMARCA1	TCTA	RBP7	PDIA4	GJC3	MAF	IRF6	RFWD3	TMEM88	SYNE1	ATP6V0E2	44259	TBL1XR1
	FOXA3	ZMYND10	AC104836.1	ZNF280A	AC012512.1	AL132642.1	AC036214.2	PSMC1P13	AC099343.3	AREL1	TCEA1P2	AC005180.1	CPSF3	AC112777.1	OTX2	GIMAP8	MED9	KANK3	EFR3B	SRR
	NMRK1	CD34	AC087481.2	NPR3	ZSCAN23	PAGE1	ZNF70	CSMD3	NENF	KCNQ5	CNOT11	CRYBA2	MAPRE3	ASAP1	CCDC146	HMGN2P19	DSCR8	SH3BGR	TCF24	PRR20G
	RNU6-62P	SGCA	AP001136.1	LYPLAL1	LAMA3	IL24	AP003680.1	ZNF749	ANKRD10	STARD4	GGCX	NEXN	AC092647.5	GPR39	DNAJC9	HSPB6	AP002906.1	DALRD3	AC004485.1	PLCH1
	AC012574.2	DNAJB11	AC008761.3	LINC02300	AC009154.1	PRPF40A	MAFG-DT	STRAP	MSRB2	AC104793.1	TNPO3	DCTN2	FAM222A	MIR770	AC090099.2	AK9	ESPL1	MIR3671	TBC1D1	RAMP3
	LINC00460	44260	AC068987.1	SOWAHB	TMEM129	ATP6V0A1	AC017100.1	TOMM34	KCNQ4	NALCN	SOX21-AS1	APOL1	RCE1	TRANK1	SNAPC1	CARMN	MUC1	SERPINE2	GOLT1B	TNFRSF14
	TSSK5P	VIPR1	GBP1	ACSL5	LYL1	AC016723.1	KAAG1	AC005674.2	AC121334.2	MIR3936	POMK	LINC02575	TRIP11	TATDN1	CMTM6	PTBP1P	PAGE3	ZNF589	KLHL29	CUL3
	MARS2	AC133548.2	ADSS	ARL5B	AL606469.1	TMEM217	CHD9	Z82186.1	ACOT9	AL031719.1	CNNM3-DT	ZNF524	LINC01719	PCSK7	DSP	MITF	AP000547.2	HMGA1P8	RADX	KRTAP8-2P
	FUBP1	C12orf49	ZCCHC10	DLGAP5	TRA2B	AC026316.2	AC009720.1	AC079062.1	ADAM33	SUDS3P1	MIR5689HG	LINC02001	AC011472.4	WNT7B	ERO1A	SCRN1	DCST2	AP001107.5	LINC01001	DYNLT1
	MCF2L-AS1	SOX12	SRXN1	CTCF	BCAT1	TCTN3	POM121C	BORCS8	E2F4	AC073343.2	MTA1	HTR1A	TRIM28	AC105254.1	SSB	CDH9	RRAD	CRABP1	MKNK1	AK4P1
	ADAM17	KPNB1	LDB1	AC008759.2	CLMP	PSORS1C1	HLA-DOB	MIR3651	NDST3	DNAJC11	ACACB	RAB2A	AC104083.1	FAM229B	TTLL4	AC126474.2	CAPN11	TUBA4A	FOXO3B	EIF3C
	PIGO	AC015712.6	LINC01756	CSTF2	DHX58	HIST1H2BD	TARDBPP2	IQCF1	CDK13	TSPAN2	ODF3B	BRWD3	DERL3	CCL14	RAB11FIP5	RCN2	GTF2IP3	HNRNPH3	FBXO41	AL356481.1
	CNMD	AC104119.1	FAM86DP	EYA3	ERGIC1	CT45A5	CETP	PPP2R5A	TLX3	RASIP1	AC004980.2	NIPSNAP3A	UBR5	ATP2C1	CYTH3	AC126323.4	LYRM1	NIPAL4	AL121949.3	SPATA31C1
	FREM2	HMGB3P30	MFNG	KLRB1	AC107959.1	AC015917.2	LINC01976	FAF2	FBXO8	HMBS	AC138207.3	CFAP77	ZSCAN16-AS1	AC069277.2	PAQR9-AS1	FANCM	AC106730.2	WBP2	AC025449.1	LINC01410
	AC079780.1	SAPCD2	FLCN	RPSAP46	AC106900.1	DYSF	ZNF143	AP003559.1	TBC1D31	AC074117.1	ARHGAP19	TMOD1	GATA3	AF186192.3	AP003174.3	AC129492.1	SH2D3C	SLC38A9	ASXL2	BARX1-DT
	HERC2P8	SRPK1	JUND	HLA-H	BPTF	AC245100.6	AL512303.1	LINC02048	AL355355.2	LINC02404	CIAPIN1	HMGN3-AS1	AC005052.1	AC016831.5	MT-RNR1	AL672167.1	FARSB	SNRNP200	TRMT5	THUMPD2
	AL031058.1	AP005273.1	NUP50	TEX37	SMARCC1	NT5M	AC025254.1	MIR125B1	ZDHHC8	C8orf33	LINC01940	TSTD1	AARS2	KCNK4	TSPYL2	LINC00276	SF3B3	LINC00887	NPS	UNC79
	SLAMF9	HEY2	KCNK6	VWA8	RAMP1	PTP4A2P1	GLRX3	RASD2	CREBL2	TMEM176A	FOXO1	ACTR8	AC073359.2	KLHDC8B	FAM230C	TTC27	LMCD1	EIF1AD	RPP40	TAF11L14
	VWF	USP43	AC011503.1	DCLK1	FRMD4A	AC018558.2	CAMK1	ZDHHC5	HIST1H2BK	MANSC1	EIF5	VWA5A	LINC01910	DHCR7	AC011632.1	AC103563.4	AOC4P	SLC51B	SLC1A4	SOX9
	RPS3AP54	WDR36	AC008957.3	PCNX3	CENPBD1P1	LANCL2	IFI35	EGFR	PTGES3L	AR	AC007786.1	RIIAD1	RBMXP2	AC005537.1	AL031775.2	TRPS1	SNED1	AP001476.1	ECM2	COBLL1
	SLC25A22	LNCPRESS1	AIF1L	AC091814.1	LCOR	PCDHB6	P2RY8	ABHD17AP8	BX640514.2	DNAH8	AC092881.1	COPS5	OR3D1P	ZNF442	AC058791.1	AP003548.1	SYCP1	AP003784.1	AC245033.3	RNA5SP118
	SNORD116-30	GLT8D2	TUFMP1	LINC00871	RFX2	GAS5-AS1	ZC3H8	AC007114.1	TRIM38	MEF2D	ZNF460	SLC46A3	AC011270.2	PPIAP4	TRADD	ARHGAP6	DOCK7	AMER2	AC093791.1	AC138474.1
	MIR137HG	UXS1	TNXB	IL11	AC016394.2	TRIM71	GALNT16	HSP90AA1	GIMAP7	AC109439.2	LINC00847	AC010754.1	MNAT1	ZNHIT6	SETD7	LINC01315	CD93	AC100782.1	AL365204.1	AL136140.1
	AC105219.4	LRP2	AC009487.3	AMPD2	AVL9	ZNF705CP	SLC52A2	AL390334.1	SGSM2	COL14A1	AL929601.1	TDG	HR	AC004852.2	MIER3	ADGRD1	GTF2H3	PAK2	GNA14	PRICKLE1
	GRIN3B	AC022706.1	NDUFB2-AS1	ELAC1	H2BFWT	RNA5SP338	UTP4	AF001548.3	LINC02315	CFLAR	YY1	KLHL18	FUT8-AS1	AC139795.3	ITGA11	AC010223.1	UPK3A	KIF25-AS1	GINS4	AL035423.1
	AC103808.5	H2BFM	TAPBP	ARRB2	SLC24A3	AC022540.1	AC093714.2	AL590226.1	AL118511.1	HSP90B1	COPB1	AC013480.1	AC009955.1	CIP2A	LINC00470	BUB3	GTF2I	FBXL18	AC108673.1	SCN4B
	COL11A1	IREB2	EDARADD	OTUD6B	MFAP2	AJ003147.2	AC008608.2	AC114316.1	AC246817.2	ASNSP1	SEC62	ANP32A	ACY1	GPX6	LINC01623	AC099499.1	TOX	IL1RAPL2	AC092422.1	AL512638.2
	NCAPD2	POLR2C	ABAT	AC010595.1	AL139819.1	SETMAR	BMI1	AC027575.2	LINC02189	AC005307.1	SLC35F2	SUN2	SPSB4	CNTN5	PGK1	SLC35F5	TMEM33	TERF1	APC2	TMEM158
	IFNL4	MOB2	MTND1P28	MYL6	AC002454.1	AC247036.1	LINC00921	SNORD114-10	AL118558.4	AC011298.2	ATXN2L	USP24P1	SLC25A37	INTS2	SLC39A10	SOCS2P2	AC241584.1	THAP12	MDFI	LINC01273
	MBNL1	AC060765.1	BMT2	MIEN1	C12orf56	CDC42P4	AL512604.2	NRSN1	B3GNT5	LINC01160	GCGR	PDE1B	CLDN5	CDH5	SLC35C1	PMS2	AC118553.1	LINC02290	KRT8P30	RF01909
	OXCT1-AS1	PPP1R3G	TCEA1	SLC39A6	HMGN1P37	AP000233.1	CORO6	KIAA1211	FZD1	SLC11A2	ARRDC2	THADA	XPA	MAP6D1	STX12	AC098859.1	AL109955.1	TMEM72	LINC02428	LINC00518
	GFM1	CCDC77	AC092809.4	AC104687.2	AL513217.1	AC007099.2	DRAXINP1	AC108134.3	LINC01918	STT3A	RNFT1	NDFIP2	PMS2CL	AC026355.1	ODC1	NPPC	HID1-AS1	CDH2	DHRS1	POU3F3
	LAMB1	ORC2	SLC2A1	AC009126.1	CCR7	SMIM21	AC005077.2	SYT11	SMYD5	GNL3LP1	LIN28B-AS1	AP005119.2	PGAM1	C1R	AC112178.1	AC106771.1	ZBTB39	FADD	AC025881.1	HIVEP3
	MIEF2	TTLL12	SERP1	SYT1	MAGEA5	PIR	SINHCAF	AC009132.1	CDCA4	NUS1P1	RCC1	TMEM39A	PTPRM	AQP11	AC133552.5	CR786580.1	ISCU	UGT1A12P	PLXNB1	LINC00620
	PPFIBP1	CEBPD	AC087241.3	AC008125.1	KLHL38	DCBLD2	AL357054.3	CANT1	RNA5SP283	ZNF365	AL391261.2	FAM184A	OR6F1	CPNE7	TMEM106B	ADIPOR2	MAGEB17	HNRNPA1P16	PRKCA	ZNF18
	PEX2	AC004987.3	MICALL2	AC104653.2	FXYD1	TMEM176B	MRPL3	FBLN7	AC004637.1	GAPDHP15	AC245517.2	ASRGL1	AC099850.3	AP005230.1	AC011298.3	AP002768.1	DTNBP1	GRP	HTR1D	C10orf88
	GYG1	AL121821.1	AC246817.1	ECI1	MIP	LSMEM1	LINC02120	FXN	FZD8	MFAP5	CHUK	AP000255.1	HECW2-AS1	CYP27C1	OR1F2P	RPS7P11	GATAD2A	HAPLN1	TANGO2	EDDM3CP
	COL4A2	NCAPH	PPHLN1	GABRG3	NPEPL1	DMPK	AC009093.6	MDFIC	ANPEP	AC005332.6	ZNF846	WRNIP1	ARPC5	ZNF641	RABGAP1	DDX25	AC091138.1	HNRNPA1P52	AC021915.2	LINC02588
	PRKCE	DHX9	PTPN14	ABALON	GPSM1	ZNF488	RGN	LINC02059	ABHD18	MT-ND6	ABHD4	AC019181.1	CD58	NECAB3	PDLIM3	AC116447.1	LINC00519	CNEP1R1	EIF5P1	HOXC13
	AL360175.1	STON2	LNPEP	IL6R-AS1	AC105020.6	HCP5	ASIC2	TRIM69	MYOCD	FAM90A27P	LIMK2	AC010245.2	AC122688.4	TOP2B	XRCC5	MISP3	AC005034.3	RBMS2P1	BTBD3	AC092574.2
	TFRC	INAVA	AC078860.1	HSPB1P1	PSEN1	AL162413.1	ITGB1BP2	STK39	AL133467.2	AC011453.1	NETO1	CDC42SE2	PLPPR5	NEK2P2	AC109635.3	SMAD6	CERKL	DBP	LINC01594	SMIM13
	MTDH	RAD21	NPAS4	HIF1AN	SFRP5	CYYR1	RBM25	AC135050.6	RPL7P1	TMEM216	MARK4	MESD	AF130417.1	CCAR1	LINC01981	AL139246.5	RSPO4	KCND3	AL133523.1	EIF2B2
	CCDC169	CKB	NFKBIA	GEMIN6	LEUTX	CALCOCO1	ILF2	AL157931.1	NCOA3	FAM214B	AC126915.2	AACSP1	TENM4	SNAI2	PROCA1	CCDC69	PROKR2	DLEU2	AC133919.3	SYT7
	MBIP	LRFN5	CCDC130	SUPT3H	TBX5	AHDC1	AC015908.3	DNAJA1P3	FOXO1B	KDM1A	PAX2	AC011095.1	RBM12B	CBX1P3	AJM1	KCNN1	FAM9A	AC013553.3	SMC4	AC015712.2
	AC027701.1	NAA25	BEND4	AL391261.4	FIGNL2	FLT3LG	RORB-AS1	SNORA71A	PPP1R9B	SDHAF3	AC008738.4	KRT18	WDR1	SLC6A10P	NFXL1	RNF170	ATF3	GPKOW	GALNT14	AL359853.1
	AC097376.2	HOXC13-AS	TEX10	ACCS	RN7SKP57	SNRPA1	B4GALT6	AC112176.1	OR7A5	TP53TG3HP	CCM2L	BX322234.1	AC006270.2	SCAMP1-AS1	C1orf109	COG5	TSPEAR-AS2	SPIN2B	MOK	FBXO36
	PABPC1P1	PRPF19	AC113191.1	AC010522.1	AC021224.1	IKBKB	TSN	AL732414.1	AL136366.1	VSNL1	TENM3	AC245517.4	RNU5B-2P	DUX4L46	SNTA1	AC068987.4	SH3GL3	LINC00491	RPL7L1	ADGRB1
	AC012073.1	PCLO	PDZD8	PRR14	SATB1	HOMER1	FOXP1-IT1	AL583785.1	CELF2	KCNMB2	MPHOSPH6	AC073333.1	AC018445.1	PTGIR	LINC00408	LINC02163	AL035458.2	AC131159.2	SPOP	LINC01748
	TJP2	TCEAL4	MIR3147	NOC2L	RNF144A	AC026271.3	MPP5	UGGT1	BTBD2	AC092638.2	DDX31	MED15P6	RANBP2	CA5B	AKR1C3	CHORDC1	STRADB	PVT1	LPAR3	ROBO4
	PCDHB2	LINC01572	AC010531.4	TLR1	ASMTL	TMEM221	AC003665.1	KCNK18	AC009312.1	FRMD5	NXT2	EPAS1	AC145207.5	AC005840.4	AL109610.1	IGLVIV-59	UBAP2L	DLGAP1-AS1	LYNX1	LINC01412
	DNAH2	SIPA1L3	KRTAP8-1	AC106801.1	TAC1	TNFRSF1B	PCNPP3	LINC01467	LRRTM2	SNORD114-21	SORBS3	RTL1	CA10	CTF1	COPG2	BMX	CDCA5	GALE	PDE7A	PDE12
	AC104447.1	COX7B2	GRK5	AC007040.2	OR7C1	RBP5	DLEU2L	IDI2-AS1	LINC02181	CWC22	MEX3D	MIR222	AC107021.1	CARNMT1	PERP	AC005609.5	PCDHA7	WAPL	DNAJB5	SMG8
	TMEM260	LINC01249	AC025171.4	AC005839.1	LINC02512	PRR3	CCR10	ARHGAP10	GPX8	AC128657.1	ALG10	AC005255.1	FEM1C	AC092278.1	KRAS	REXO1	SGPL1	TRIM45	RCSD1	HOXB6
	COL4A1	LINC00907	C8orf76	AC092969.1	LINC02484	SMIM24	AMZ2P1	FMO5	ELK3	SAR1B	CAMK1G	IL21-AS1	AL445426.1	AL031846.2	LMLN	TPTE2P6	DUSP6	LINC01194	G3BP1	FAM189B
	NTRK2	ISPD-AS1	PHOX2B	ZNF714	WDR31	CDKL3	FPGT-TNNI3K	AL022318.1	ERH	PRMT3	PDK3	FGD5P1	BMP6P1	AC002398.2	LINC00221	KRT3	FOXD1	HOOK1	RF02252	HLA-A
	LRRC8C-DT	DGLUCY	AL590652.1	RTCA-AS1	LINC01510	TP53TG3D	PPP2R1B	PPP1R12C	TBX1	AC106774.2	F11	NCAN	EMP1	WDR13	PHB	DRAM2	AC105402.2	TXNIP	AC103808.6	SCRIB
	SP8	LINC01597	TRAF3IP2	AVPR2	SLC2A9	AC019257.2	TRUB1	NOXA1	GASK1A	NRG1	RASGRP3	TNFRSF14-AS1	AL079305.1	CASQ2	PTGES3L-AARSD1	AC131206.1	RCAN3	AL359711.2	AGTR2	SNAPIN
	MAGEB3	WRN	CECR7	PRR26	RCC2	PPIAP16	ACKR4	MEIOB	POLR2H	ESRRG	AC005609.1	MCM3AP-AS1	UCMA	ARHGDIB	SULT1E1	NAPA	APOM	PTGES3P1	PRKACA	SENP5
	LINC01029	ERBB4	AC139149.1	LINC01971	GLCCI1	GBP1P1	PRR11	AL390879.1	RAG1	PHLDA1	ESF1	EXOSC7	TSC22D2	CUL7	DIO3	CT55	AC053503.4	PTPN23	TBC1D10A	AC087521.1
	AC013451.2	NPM1P6	PTGFRN	HGF	HIST1H2APS5	PBX1	CDH6	ZNF358	SPRED3	SYNGR2	LINC01893	FGFRL1	MYO1C	NME6	SETP20	NOP16	ZDHHC20P4	HNRNPA1P12	HSD17B12	FMN2
	HIST1H2BL	SART1	AC022211.4	RNA5SP317	AC027228.2	AZIN1	TNFAIP1	RNASE4	AIMP2	F11R	AC091305.1	IGFBP4	NPW	JUNB	MRTO4	AL663074.1	AC026471.2	CCDC88C	AC012313.4	FABP5P7
	NF1P11	UCK1	FOXB1	EIF3B	FAM3C	SCARNA1	PRMT1	DCAF8	AC083949.1	LINC00640	C5orf38	ZBTB12	AC013410.2	AL513497.1	SYP	MDN1	PTRH2	GCG	AC012378.1	SSRP1
	ZNF516	KDM4A	PPP1R32	FAM57A	AC016571.1	HIST1H2BA	SLC4A10	AL035458.1	AC112721.1	XPOT	AC024581.1	C9orf3	KBTBD6	AC133065.3	SHQ1	TMEM64	CYP4F32P	COL9A3	CCDC74A	IRX4
	KDM5A	AC092783.1	ZNF507	AC073476.3	GART	AHCY	ARL4D	AC093827.3	NPM1P21	LRIF1	AL032819.1	HEATR5B	MED15P4	DIABLO	ARHGEF28	PHKG1	FAM118A	RAB33A	RPS26P31	ITPR3
	RNA5SP19	EIPR1	HSPB7	AL355076.2	AP3D1	NFYA	GOLGA1	TTLL7-IT1	AL109741.1	U2SURP	NOS3	MBD4	AC063977.5	FBXL19	ZNF25	SNRPE	SHANK1	TP53I13	TMEM248	FUT8
	GATA4	AC104561.3	ACPP	AC108125.1	AL354928.1	GIGYF2	IL37	AL121906.2	AP000808.1	AC009237.14	MEF2C	AC099522.2	ZNF805	CNTN3	IL17B	IL17RE	HHAT	SAMD15	LRRC2-AS1	HNRNPA3P11
	RNU7-53P	VENTXP2	ZKSCAN2	TRIOBP	ASB1	EHBP1L1	LINC00528	ORC1	PCDH1	UBE2V1	MIR126	AC127024.6	PIK3C2B	CACHD1	CIDEB	ANKRD61	MED15P9	AL121899.1	UGT3A2	C17orf67
	SPIB	APH1A	SLC29A4	BCORL1	AC092634.4	NCR3LG1	METTL2B	BORCS6	LINC00891	VCPIP1	STK35	OSGIN2	ETNK1	AC023301.1	RF01518	NEUROD4	MKLN1	AL355512.1	FOXE1	RASGRP2
	ITGA9	AP000254.1	ANXA6	CRIP1	HSF1	AC211433.1	THOC2	LINC02443	LIFR	EVC	GGTA1P	RAB12	ZNF324	HTR5A-AS1	LINC01980	LINC01351	MREG	AC135731.1	ACAP2	AL135785.1
	BAIAP2-DT	AL137186.1	PNPLA2	AL136084.3	RNF40	AL121955.1	AC025280.1	DDOST	NREP	AP001148.1	AL512598.1	PRDM10	EXOC2	MICA	IL12A	LRRC10B	GKAP1	TLL2	MYRF	AC079384.1
	RNU6-140P	DNAH14	EPHA1	MIR1-1HG-AS1	PCDHB3	ASPHD2	C22orf42	CLDN19	AC018647.1	DNAJA2	MAP1A	RPL10P7	AC136944.4	RBM45	TBC1D5	AC106745.1	AL139351.1	AC079416.1	TENM2	TBX19
	PGM5	MCM4	AL122010.1	C5orf30	MAATS1	AC013470.1	LINC01123	RBM8A	ELMO1	PAPOLB	LONRF2	CLDN10	SETP22	TSPEAR-AS1	AC126614.1	AL645608.6	ZFP57	AC079160.1	TRPV6	KRTAP2-2
	CAND1	HMCES	AC104564.1	AC005702.2	AC129492.2	AMMECR1L	INHBC	C1QTNF2	SRSF1	AL365259.1	KBTBD12	ATP5PBP5	MSMO1	H3F3B	CHN1	RECQL	FOXL1	NBAS	SLITRK5	TRMT6
	CYCS	WDR34	SERPINA6	CKMT2	ADAMTS10	STXBP3	PKMP3	LINC01176	AC091076.1	AC008840.1	ARSJ	SIX3	FBXO30	PCDH12	CREG1	AP001094.2	RIOX2	PPP4R2	AC007099.1	ANGPTL6
	GVQW3	AL096701.3	ALPK1	PRODH	DCUN1D5	PRSS36	RAB10	SIPA1	MRPS36	GAPDHP21	AC034236.2	AC114808.2	GPATCH11	CCDC9B	AC016737.2	LINC02447	AC024132.1	COL25A1	MAOB	AC069528.2
	GNGT1	FGF19	ZNF561	AC104211.1	ASAH2B	HNRNPR	ZBED6	DCUN1D4	CCT7	MEG8	SGO2	INPP5K	NUTM2F	AL450332.1	AC018904.2	CAPN15	GCNT1P3	TBL2	ADPGK	LINC02582
	SLC32A1	AC004552.1	CASD1	RXYLT1	ROBO2	ATP13A1	SNORD11B	CAMSAP3	AC087627.1	FAM220A	PPARGC1A	RRM2	SLC46A1	LINC02041	LBX1	RNU6-892P	SHANK2	AC132825.4	GUSBP8	BET1
	RNU1-130P	HPSE	AC098614.3	SPATA31D1	AC006547.1	RNU6-1055P	VPS37D	PPP6R3	AC003102.1	AC118754.1	PKN3	RAX2	RFX8	PALM	ADGRL4	RP9	IFITM4P	HDHD3	DCAF1	GID8
	AC022613.1	ISG20	AC009065.4	AL021707.6	TOM1L2	RTP4	AC106799.1	LINC01248	AL049873.2	LDHA	RCOR1	AC233992.2	ZSWIM7	CADM3-AS1	AC107419.1	MPPE1	GARS	RAB11B-AS1	ANKHD1-EIF4EBP3	CHD8
	ZFYVE9	EVX1-AS	PEG10	FAM19A4	DHX38	AC244517.2	LINC02405	TACR2	HSPA9	FAM210B	ATAD1	METTL9	COX16	MIR545	RFLNA	RNU7-121P	INPP5J	NAA16	IARS2	AL121904.1
	ELL3	LINC00261	TMEM132C	RPL23AP77	CSAG2	GOLGA6L10	RNF157	EXO1	AL138787.2	MIR6507	TENT5B	FBXO22	MIR4713HG	SC5D	KIF2A	AC008770.2	AP002383.3	EIF3E	SEMA4G	AC090720.1
	TAS2R38	RNU2-7P	GIMAP4	AC010226.1	AC020891.2	CD3EAP	SEC23B	LINC01392	PXDN	PCDHA13	RNASEH1P1	AKR1B1P3	HNRNPK	USP34	ZC3H3	YARS2	BEND3P1	PLVAP	ATP2B4	AC008760.1
	SBSPON	OR2S2	INKA2-AS1	AL117190.1	RPS7	AC097639.1	AC087289.6	TTC26	COLEC11	AC024230.1	PPP1R14C	ZEB2-AS1	MIR4648	TOMM40L	MRPS14	AMBN	AC083805.2	KDELR3	AC008752.3	PLPPR1
	AL139384.1	ENTPD1	ERCC6L	CCDC68	NFKBIZ	CTSLP8	DOCK1	AC007326.1	PTGES3	TESK2	ZNF74	AC008050.1	VPS45	RWDD1	CEACAM22P	FXYD6P2	AL118558.3	REEP6	KIF11	ZNF44
	RN7SKP97	YWHAZP4	LINC02326	KCNV2	MDGA2	ZNF587	AC073343.1	WDR54	AC018541.1	ELOVL6	AC122714.2	TOMM20P4	MTHFR	DSCR4-IT1	DNAJC12	PLCE1	LMO1	AL023802.1	OR10V3P	ZFP69B
	MIRLET7D	DYNC1I2	AP001469.3	AC027306.1	SELP	LCE2A	DHRS7B	AC090771.1	CCT8P1	PNPO	HERC4	ZNF710-AS1	AC093752.1	YIPF4	CSGALNACT1	EXOC3L1	OR1J4	SSR1	AF241728.1	AC026355.3
	AC108749.1	AL391001.1	AC112493.1	AC100821.1	MOAP1	PCAT1	EFCAB7	C11orf95	AP000619.1	AC004817.3	ZBED1	PAPOLG	HNRNPA1P61	LRMDA	CALHM2	TM4SF18	DISC1	KIDINS220	TBCCD1	AL357054.4
	SLC14A1	EEF1E1P1	SUGT1	LEMD3	CDH10	AC016773.1	ZNF239	AC068057.1	STAU2	CHCHD2P9	HSPB2-C11orf52	CMTM7	SECISBP2	RPL7	LEO1	CKAP4	LINC01100	NOX3	HYOU1	USP32
	RAD18	ARHGAP32	RNU6-505P	DDHD1	NDRG2	AC119868.1	SPTBN2	HNRNPA2B1	CASP10	ETV7	AC093627.5	DNAJA1	SERPING1	AC006003.1	HEIH	GANAB	KCNJ5	POM121	AC109492.1	HTR5A
	ABCF2	IGHVII-46-1	MAGED4B	CPQ	SYNPR	AC068880.4	NKX2-1-AS1	AC073548.1	TINAG	GNLY	TNKS1BP1	TOR3A	PRRC2A	RN7SKP148	HSPB1	KBTBD8	ZNF335	LTK	EGFL7	AC090771.2
	SORT1	SPAG5-AS1	AC025884.1	MARVELD3	HNRNPA1P71	ABHD14A-ACY1	TMEM185A	OBSCN-AS1	AL121749.1	Z84484.1	EVX1	P2RX7	AP001554.1	LINC01801	TMEM220-AS1	IMPDH1	AC138625.1	SLC47A1	IL32	ARCN1
	TRMT112P7	PLCXD1	SEC24C	MIS18BP1	OVAAL	RPL31P50	C19orf57	ALPK3	TIMELESS	AC106774.4	RNU5B-4P	FAM111A-DT	PLEKHM3	LGSN	CLPB	AC097374.1	DENND5B	NOG	DUSP11	NKAIN3
	SLC25A28	TWIST1	PDE2A	PIP5K1A	HTR7P1	SLC1A6	GARNL3	GLB1	CNDP1	AC003986.3	AC233724.9	NUDT21	AC093515.1	ROM1	AC073913.2	ZCCHC23	AC092953.2	U2AF2	TG	USP14
	MRGPRF	AC084116.2	AC092811.1	PDCL2P2	AL139811.1	MTX2	GOLGA7B	AC010531.1	NPM1P24	MPP7	HMGB1P5	KLF2	LINC02660	DYNC1H1	ECD	AC008555.3	LINC01049	LINC01018	ARHGAP27	DMRT1
	SNAI1P1	MIR34AHG	SLC25A43	CAVIN1	WNT16	HNRNPA3P6	F2R	AC136285.1	AL691420.1	AC079793.1	CHD4	PCOLCE	AL845311.1	AC008443.5	GDF11	PPM1G	ZNF639	SLC22A3	TMC1	BANF1P2
	TRH	AC003006.1	SEPT7P2	EHD3	AP000911.1	RABGAP1L	CRH	CHRNA1	RMND5B	NF1P6	NOSTRIN	SH3TC2	ARHGAP15	LINC02211	KIRREL2	CEBPB-AS1	AC073901.1	HMHB1	KLHL1	AL162586.1
	AC104057.1	FBXO45	SNORD111B	AC024559.2	MOGS	PGBD2	HIST1H4E	TAF4B	STEAP1	LRP1	FUZ	GRM7-AS3	PSPC1P2	SNORD113-3	DNAJC14	RNU4ATAC18P	RIOK1	VAT1	AC103808.2	AC073136.1
	AC068533.4	RPSAP15	ZC4H2	HNRNPA3	FRMD6-AS2	WTAPP1	AC131532.1	AC008752.2	PIM2	XYLT2	ASPH	MIR1301	LSAMP	REEP1	ADCY4	SNORD113-2	IFNL3	LRIT3	LINC00960	LINC02535
	AL021546.1	SERPINF2	AC092164.1	RSU1	VWA1	RPL7P52	KHDRBS1	HDGFL3	OSGEP	TACC2	AL023806.1	TDRD7	ITIH6	VTN	TUBA1C	WASHC5	OR13C6P	GABRA2	AL355482.1	MIR3936HG
	FAM161A	AL928654.4	MT-CYB	ARMCX5-GPRASP2	CDC45	TEX13B	AL020997.3	ARHGEF15	OPRL1	UBE2D4	AC023794.2	SSC5D	HIST1H2AH	BCL7B	LDHAP4	CYS1	ITPKB-IT1	SEC11A	ENTPD5	LINC02620
	SLC8A3	AC010931.2	DOC2GP	TLR5	WDR74	AL662844.3	ZNF92	C8orf37	LSM14B	SLCO4A1	LINC00702	AL161891.1	AP003119.3	SLC6A20	AC104653.1	RN7SL835P	PNMA5	RBM14	ZNF266	IRF1
	AC008105.3	FERMT1	SRPX2	ZMYM4	MPPED2	AGK	EMP2	OSTM1	MRGPRX3	PIK3CA	AL592211.1	BTBD11	HNRNPA1P4	AC016397.2	MSL3P1	NDST4	CCDC191	TRERF1	AC005993.1	AL117344.1
	SHMT1	ACVR1B	SNORD114-13	TNS3	AL590648.3	TASOR	CCDC13	ACLY	TPI1P1	JPT1	KANK4	AC020634.1	XDH	TRAF7	DPY19L1	CCDC151	WSCD2	RALA	AL645939.3	SLC1A3
	BCL2L12	GEN1	MYO1B	HMGB3P6	SHC4	AC093909.6	SYNE2	TCEANC	SLITRK4	AC005224.4	SCAF11	GTF2IP6	PMPCAP1	AL645939.1	LTC4S	HERC2P5	MIR219A1	AL772155.1	ADAMTSL3	NBPF5P
	NIT1	AC032019.2	GTF2A1	PURG	MIR9-1	POU4F1	AQP12B	HIST1H2AI	SH3D19	GLS2	AL356599.1	PANX2	COX7A2	COLEC12	MFSD2B	RRAGA	PTGDR	PLA2G2A	SRSF7	CREB3L2
	ZNF280B	AC234582.1	AC010649.1	ASB9	RIPK2	AC018511.1	AL135936.1	FAM13B	EXOC6	ZC3H13	PLEKHG4B	RNU6-716P	XRCC2	VDAC1P6	KHNYN	TAF9B	LPO	LLCFC1	AC026688.1	GNAQ
	AL353093.1	LAMTOR3P1	SEPT14	ANKMY2	AC006041.1	CPSF6	LINC02587	IGFL4	WHAMM	KRT127P	PRDX2	BTBD7	AC010168.1	WTAP	DDX50	CICP22	LTB	RAB23	PDP1	JHY
	ZNF451-AS1	ELOC	LRRC75A	OR2L6P	TMEM167A	CAPS	FAM92A1P1	ADAM10	SRGAP3-AS3	AC012653.1	TMEFF1	AC008837.2	ABCC4	AC011893.1	CPSF2	CLIP3	PAK1	LINC00383	UCP1	UGT3A1
	LINC00629	PA2G4P6	LINC00939	ATXN7L3B	HID1	AC004790.1	EDNRB	CPB1	AP005119.1	GIMAP6	CCNT1	COL15A1	NGLY1	HSPA8P13	GAGE12J	MIR4506	LCA5	WASHC3	COLCA2	HSF2BP
	PLEKHO1	MED14OS	NPAS3	CYP51A1P1	AC008014.1	SNRPEP2	CERK	SNTG2-AS1	LINC02281	RGL3	TLDC2	DYNC2H1	TRIP12	HNRNPA1P26	LINC01704	RAMAC	EIF2AK2	JAML	PDF	C11orf42
	AC093567.1	ZDHHC22	RFX4	MC4R	PLA2G12B	RAB3GAP2	RNU6-956P	LINC00967	MDS2	KMT5B	AP003071.4	AL109614.1	NAALADL2-AS2	LINC02440	OR4A49P	PPP4R3A	AC245123.1	ULBP2	MRPL34	PLD1
	RAB6C	AL606537.1	H1FX-AS1	ZFR2	CMTM4	GORASP2	ISOC1	HLA-F-AS1	AC100823.1	C14orf28	AC090502.1	MFSD3	PNPLA7	LRRC3B	AC004596.1	GMFG	AL353743.1	FOXO4	LINC00621	TMEM200B
	AC007106.1	BUB1B	ITPRID2	IPO4	AC127029.1	AL355987.5	COG6	DCHS2	PICK1	RNF19A	GPX3	MAST4-AS1	HSPB3	PSORS1C2	CCDC134	USP6NL	LINC02595	GRIA4	PARGP1	IMPDH2
	PRKACB	AC245517.3	VPS29	RBMS2	AC083862.1	SAA3P	RYR2	MIR3193	MTERF3	S1PR4	FBXO25	NOP56	AC009477.1	AL136295.2	AC096677.1	MT1H	POLR3GL	AC010976.2	RND3	RN7SKP115
	AC093151.2	MCM3AP	NF1P7	NEU2	SMAD9-IT1	PSAT1	HIST1H2BC	AC040936.1	SIGLEC20P	LINC01549	PAFAH1B2	TACC1	ADPRM	AC131025.1	AC103681.2	TRAP1	LINC00844	ZC3H14	NLGN4X	AL445673.1
	PATZ1	AC243964.2	AC116609.3	RNF103-CHMP3	NDUFV2-AS1	TCF4	AC010789.1	RPSAP19	AC104136.1	RALGPS1	AC116366.1	AC018735.1	PYCR3	IRF2	STIP1P3	SEPSECS-AS1	LINC02615	AL033519.3	ALKBH8	TUBBP6
	COIL	CCP110	NEDD4L	AC009812.3	TAF2	MRPL50P1	HLTF	MAGIX	TOB2P1	RPS7P8	TIAL1	ZNF513	RPL21P103	AC010857.1	SCN8A	AL139339.1	AC068620.2	AC005540.1	AP003025.1	LINC02051
	PDK4	AC004987.2	AL445472.1	TMEM121	ADHFE1	HNRNPA1P2	DDX56	AMDHD2	MAGEC2	BLID	AL356488.1	TRIM50	AC138207.5	ARL2BPP8	TMUB2	STRN	SRP68	CDR1	RPS26	LINC00317
	LINC00957	TRPC7-AS1	TMEM30B	CASP12	CCNT2-AS1	FOXP1-AS1	AC005481.1	POU5F1B	AP003174.2	ATG16L1	RLBP1	BCCIP	AC087071.2	DNASE2	SELENOP	TIGD5	AC104009.1	AC079601.2	DDTP1	AC018730.1
	MGME1	GPATCH8	AC015726.1	TPPP3	OR5K2	UCP2	HPD	AC076968.1	TTC28-AS1	ALDH1L1	PROX1	AC092747.4	RPL10L	WWC1	CCDC96	AHSA1	CENPQ	CCT5	POTEE	FO680682.1
	C6orf226	AC012603.1	RWDD2A	RNF216-IT1	BTNL9	RAB4B	CYP26B1	AC138207.8	AC008065.1	AC024595.1	SALL4	CNOT1	LINC01521	KLHDC10	CITED1	PHLDB2	AC036222.1	NPM1P19	MPEG1	EFCAB10
	NPM1P8	ANKRD52	SPECC1	HMGB3P10	AC022874.1	CT45A10	NKAIN4	AC005863.1	PDLIM5	AC234772.1	AP003774.3	TRIM43B	NAP1L2	COQ8A	CTSF	CREBRF	RNU6-705P	NPIPP1	AP001107.6	AL022476.1
	TPM3P4	ENPEP	SEPT7P9	FBF1	CPD	KDELR2	GGT5	TMEM220	RPGRIP1L	FAM234B	SH3D21	AC012085.2	AL353770.3	PCDH7	AC236972.3	CCL3L1	NRCAM	NBPF13P	TMEM266	AC116651.1
	AC025183.3	TLX2	AC010974.1	LINC02444	MELTF-AS1	PHF11	CDCA8	FBXL6	TSPAN19	PLEKHA4	CCDC47	FNDC8	PRKAG2-AS1	PPP4R3B	UBIAD1	LINC01278	DUSP3	CHERP	PCNPP1	AC116667.1
	ABHD17C	SPTY2D1	AC147067.2	TNFRSF4	ADA2	AC093214.1	PCDHGB1	HTR3C	ANGPT1	ZNF703	TM9SF1	AC022893.1	PCOLCE2	AC131281.1	TMX2	LGI4	HOXB1	AC068587.2	AL357559.1	CCDC6
	KLRC4	UCHL5	CDK12	LINC02103	RPL7P3	AC011472.2	AC009237.9	FAM27E3	TRPV5	AC091175.1	IL23R	NPTX2	AC098591.2	HNRNPCL2	RFC3	LINC00324	ZNF492	MYBBP1A	F8	SNX25P1
	LDB3	DACT1	USP3-AS1	AC010327.3	AC026369.2	LYRM9	EFTUD2	AC026320.2	GNB4	KAT6B	SRGAP3	SEPT1	CFB	TTC39C-AS1	AC003986.2	SLC4A11	MAG	RSPRY1	AL160408.1	OR51B5
	NCOR1P1	KRT8P39	LINC01127	AC104564.2	RPE65	CFAP65	DDX41	PPP3CC	ZNF384	AL360219.1	ZC3H12A	AC104131.1	RPSAP47	AL356481.3	TNNI3K	AC008676.1	ABHD8	AC090616.6	LINC01085	RPS6KL1
	OAZ2	AL137127.1	COPB2	LPP	PHF1	AC006305.1	AL445187.1	ATP8A2	RPL7P23	RNU6-50P	SNHG4	SLMAP	CT83	CICP26	RNU6-204P	PGAM5	IGIP	NUP107	PPM1M	AC004840.1
	ALDH1B1	SEPT4	KAT2B	KLHL28	LINC00452	ADAT1	LRRC8D	SATB2	LINC01109	GPR21	AL391358.1	CR383658.1	TYRO3	CIAPIN1P	HAND2-AS1	TTC21B	PIGA	XRN2	CLCA2	AC092651.2
	AC002350.1	HLA-C	PIP4K2A	DPRXP6	AC135050.3	HMGA1P2	METTL7A	PHF21B	RBM34	ETV5-AS1	OR8B9P	AL139412.1	ZNF560	GRIA1	CADM4	AC012499.1	AC016383.1	KCNH2	AC131274.3	NUDT17
	NAA30	R3HCC1L	TMEM235	EFCAB11	AL645941.1	PCDHB16	CORO2A	DEPDC1B	TPM3	AC006022.1	AL161935.1	EPOP	AC019322.4	AC009269.3	ABHD12B	TBC1D8B	CBLN3	AC007224.2	MMP1	AC103810.3
	LINC01750	AC004057.1	C7orf31	PGM5-AS1	PF4	ZNF7	AC006077.2	AC099518.6	RNU6-431P	AL583856.2	LINC01234	AC026250.1	ITGA2	AC079684.1	LINC01414	OR7E36P	PHRF1	LINC00853	AC005753.1	ZIC2
	GDF7	AC079848.1	RN7SL668P	CHCHD2P2	PLEKHO2	SNORD82	FOXP2	AL138767.3	C2orf72	PCDHAC2	SEMA3E	DMD	C7orf26	AC108047.1	RARRES2P6	AP000943.3	RAD51-AS1	ZNF496	AC092809.2	NAA40
	YKT6	AC096637.1	FAM180B	GLTPP1	DPY19L3	FAM229A	SNRPEP4	MIR663AHG	CADM3	PTCHD1	PEX5	AC107871.2	LGALS9	AC090617.5	GUSBP10	RPL24P8	PLPP2	RIMS3	STRIP2	FUBP3
	AC142086.5	CALM2	TMEM206	PNPLA6	AC092675.1	AC064836.3	AC003072.1	BCL2L2-PABPN1	B4GALT1-AS1	FNDC9	CCDC112	SPTLC2	AC008427.1	VEPH1	PPIAP1	FAM174A	AC016027.2	GALNT7	CHCHD3	YPEL2
	ISCA1	MTMR4	NAV2-AS2	DAND5	AC091614.1	ZFC3H1	APBB1	MIR6876	ZYG11A	AC104758.2	UQCRHP2	SUPT20H	RF02272	AL359538.1	MMP21	FAM53B-AS1	ELAVL2	SFXN1	TARS	WDYHV1
	B2M	AC002094.4	AC092757.3	GSPT1	MED1	LCEP4	AL359265.3	NUFIP1P	NEGR1	NPNT	IMPDH1P3	INSL5	SGMS2	LYPLA2	EFS	STXBP6	ARHGEF40	ERGIC2	SEPT14P17	DSCAML1
	AC069224.1	ITPRIPL2	ATP6V1E2	AC012506.1	RNA5SP460	AC022916.1	FNBP1L	ENPP2	LINC01738	DNLZ	ZNF316	44266	PFAS	AC093382.1	AC122134.1	RPL12P18	NICN1	CEP83	CKAP5	ZNF550
	AL928654.3	NRBP1	NUS1P2	KRBA1	GYPE	TMEM214	MPC1	AC005899.7	GPR176	AP005329.2	AL162431.2	AF106564.1	DPAGT1	AC009271.1	AC110015.1	EME1	ZIC3	KANK1	EIF4A2	VAMP1
	AC092597.1	ASAP2	AC015819.3	ALS2CL	RB1CC1	LINC01164	AC019131.2	AL133415.1	NDUFA7	HIC2	RILP	AP003900.1	MROH4P	ARHGAP44	ITGB1-DT	C8orf34	AL136295.7	AC116917.1	MMP16	NAA60
	SERPINE1	AC090519.1	UNC5B	ATP6V1E1	DPEP2	FAM177B	PHC1P1	DEFB103A	FAM24B	RAN	LINC01370	SLC25A48	CBX3P9	ZSCAN5A	SNHG6	TMEM132A	SCAT1	CYLD	SLC44A2	ADH5
	ANKRD18B	FAM168A	E2F7	FEM1B	PAICSP4	AC100835.1	ANAPC4	ACTBP1	NBPF7	ZNF23	AC078880.2	AL772337.1	RNA5SP131	RASSF3	NCKAP1L	BORA	AC138655.1	ACYP2	PIK3R3	PSMD14
	LRP12	DNMT3A	AC245100.5	VN1R71P	PARP9	AC126768.1	MSX2P1	SNORA55	RECK	POU5F1	AP001160.4	AL118558.1	ROBO1	AC082651.4	DCAF5	FAM174B	AC139697.1	C1DP5	NBPF20	LINC01456
	ARPC1A	AC091946.1	TARBP2	MSRA	PLEKHH3	AC121761.2	RIPPLY2	EIF4EBP1P1	AP000648.3	AC006064.2	PROS1	FANCD2	SH2B1	AC068522.1	AKAP5	H1F0	LRP4	AC100823.2	LINC01992	MSRB1
	CCDC84	LINC00536	ZNF616	HEY1	IGHVII-33-1	VRK2	OR1J2	NAT16	ZNF556	AC103778.1	TAPBPL	CRISPLD2	ARID5B	AC093524.1	MIR548AN	AC011472.1	IGLVI-56	FGF8	AL133299.1	ZNF681
	EIF2S1	PDLIM1	AC005330.1	AC113386.1	KIAA0391	ISLR2	LINC00671	AL049874.3	MORN5	PREP	AL669831.1	AC104393.1	RPL7P47	DANT1	CLEC10A	AP001767.3	SMC2-AS1	CARD8-AS1	PLA2G16	PHB2
	AC114808.1	ST6GAL1	AP003059.2	AC026979.2	TLR4	TNKS2	MDFIC2	MCM8	NLRC5	CLPSL2	PAPLN	LGALS9C	SLC25A4	AP001122.1	AC100791.2	AC118282.1	PIAS3	TPSAB1	AL627171.1	LDHB
	LINC02509	MAP3K15	TTLL3	POLR3G	SMOC2	ZNF620	SLC13A5	DCST1-AS1	TMTC2	GCNT2P1	RAD51AP2	CNGB1	LUNAR1	SNHG25	AC097359.3	LIN28A	AC009154.2	AP001574.1	SMIM17	RERG
	DMTN	MAFTRR	TPD52L1	STARD5	AC079145.1	C12orf54	USP24	RARRES2P4	COL9A1	ZFP41	KIAA1614	CDKN1A	HGS	CENPA	TRIM53BP	TLR7	DPH2	KIF26B	CCNJL	MPST
	AC107464.3	TRNAU1AP	NALT1	TNFAIP8L3	AL391811.1	LHX4	PUF60	MAPK4	SENP1	TRIM16	FOLR2	PMM2	AC093890.1	C2orf78	RNF103	SLC35E1P1	MIR3663HG	LINC01778	DCAF4L2	AP005264.7
	AL035448.1	TMEM170A	CYP4F27P	LINC00850	AC010654.1	AL354707.3	LMAN1	KRT18P56	MMP13	AL356596.1	MAB21L1	RUNDC3A-AS1	SPTLC3	LINC00920	RNF112	STARD13-AS	NDUFA11	AL590617.2	RBPMS-AS1	AC100821.2
	AC008060.3	C1orf127	LINC00930	MS4A4E	AC103808.4	AC244517.6	C4BPAP1	CD200	ALDH1A2	TUT4	CD79B	PIK3CD-AS2	AC109449.1	ANKRD11	PODN	UQCRQ	AC010894.3	EXTL2	SQOR	PSMG2
	ZFYVE19	AL591926.6	AC007557.3	ZNF688	STAT5B	AC068870.2	RN7SL523P	PHLDA2	POLB	SPATA1	AQP12A	AL445465.1	CARD18	ABCE1	KAZALD1	AC008957.2	PRDM14	SMC3	AC005899.6	SERP2
	AC010531.8	WDR82	ELFN1-AS1	DIS3	CD83P1	IQCG	SMC6	CYP1B1-AS1	RNU2-37P	IARS	C11orf88	AC099487.1	DUSP1	ADGRE5	NKPD1	PPIAP48	DCUN1D3	AC005037.1	CTSO	AC055716.1
	AC226101.1	RNF165	MPP4	ATIC	ZFAND5	CC2D1A	PARP4	MIR4768	SLC15A3	UFM1	AC009806.1	AC092447.5	SCN5A	KPRP	HCRTR2	FAM27C	AP002381.1	AC010834.3	ABT1	SMARCB1
	AC011510.1	ERAP1	SNORD114-1	MGP	FMC1	STAT5A	LINC00858	GJD4	EBI3	AL138781.1	HSD17B6	AL136307.1	AL121906.1	AP000786.1	LINC02184	RNU6-1316P	BNIP3P3	AC011444.1	MED11	AC034223.1
	LSM12P1	AL391834.2	NECTIN4	ZNF362	AC018953.1	HOXA4	PCGF2	AC138230.1	SNX18P7	AC010442.2	AL358781.2	FNDC4	COX14	AC084880.3	HERPUD2	NDUFA4	AC021092.1	LINC01872	SOCS2	TAPT1-AS1
	VENTXP3	OXSR1	Z68871.1	AC233702.1	BAGE2	TASOR2	BRPF3	IFNGR1	KPNA3	AC010343.3	RNF111	AC022182.2	TBKBP1	RN7SL215P	PSME4	AL132780.2	ATR	IGLVV-58	AC010186.3	PSMB10
	AL122126.1	FIP1L1	NDUFA5P7	DVL3	LDHAP3	IL15RA	MESP1	IQCF2	CRTC3	SNORA49	AC008277.1	ASB16	S100A14	AC002553.1	ID4	GRID2	AC026202.3	AL022332.1	RNASEK	AC104634.1
	SLC25A5P8	AC104986.2	BDNF	SLC39A9	DOCK4	MRPL42	BNIP3P11	VKORC1L1	DLL4	OVGP1	LINC01276	HSD11B1-AS1	AC104339.1	USP20	LINC01870	AC004453.2	AF274858.1	AC087667.1	CLUL1	SARDH
	KTN1	HSD3BP5	AAAS	LINC01793	AC024405.1	SPAG4	RIBC2	AL021068.1	CBFB	AC018648.1	AC004837.2	AC011290.1	AC004825.2	ACADVL	AC019257.1	TXNDC5	ELOA2	ELOVL5	GTF2IP9	NMNAT3
	AC087742.1	SRF	AL049612.1	ASAH1	BICDL1	IZUMO2	GPD2	NRAS	AC016745.2	OR7E87P	HMCN1	AC112236.2	ANKRD20A1	HDAC1P1	ASTL	LINC01608	ATG10	AP001269.3	ZNF630	GUSBP3
	ARAF	APOBEC3D	AC092645.1	KLHL30	AC012615.4	C18orf65	SGF29	IL18BP	GATC	NCOA2	AL354920.1	STAT3	TMEM164	RN7SL205P	RNF6P1	ZXDA	ZNF655	PIM3	C19orf66	ABLIM2
	GOLGA4	U91328.1	RPL10P19	LINC02495	GPS2	NDUFA2	PDE5A	AL929236.1	GACAT2	ACACA	DENR	EPHB3	CD200R1L-AS1	AC025437.5	HIST1H4D	PAXIP1-AS1	AC106820.3	LINC02178	EMILIN3	MOSMO
	APPL1	EOGT	STAB1	HTR7	HNRNPA1P64	AC010424.1	PRR18	AC096888.1	CDIP1	AL359643.2	GCNT1P1	BBX	AL353807.3	AC022509.3	XXYLT1	AC003005.2	NBR2	CSE1L	AF001548.2	CCDC189
	CHRNB4	TEX19	P3H4	BYSL	NME3	LOXL2	ANO4	AL022313.2	CD1C	CDC27	ATRX	PLK2	AP002414.2	HIST1H2BF	SUMO3	DHX32	AC093714.1	HLA-K	COLEC10	CLIP2
	KRBOX4	FKRP	GPC2	AL137230.1	AC009237.3	C22orf39	AGPAT5	DUXAP8	NCF4	AL049796.1	PRKAR1B	TPPP	PPFIA1	AC073365.1	POMGNT2	AC005274.1	BCAM	PXT1	HINT1	C3
	ZPR1	TCEAL2	JAM3	AC010536.1	AL137186.2	ATP5PBP2	B3GNT4	C16orf95	AC109809.1	ALDH8A1	AC106744.1	SIX1	SLC8A1-AS1	BRWD1-AS1	RAD51AP1	PPFIA3	LINC00942	SSC4D	SRP72	GNAZ
	RNU6-1272P	AC096559.1	AC020905.1	NEFM	AC021546.1	ZNF8	ACTG1P21	SMNDC1	AC105389.2	AP1B1P1	AC027031.2	RPS27AP13	ACTR2	FAM160B2	HNRNPA1P10	MSANTD4	AC092687.3	SRM	SHISA4	IL4
	DHRS3	RPL17P50	POLR3B	PARG	ZKSCAN5	GPR34	BEX3	TAB3	NF1P8	AC091182.1	MAGEA2B	LNCPRESS2	AC008443.6	EDEM3	AC093903.1	LINC02267	ALX4	PTGES3P3	TAF11L12	MKI67
	AC026412.3	AC114485.1	CEP135	STARD4-AS1	ZIC1	TBX20	LINC02097	AC005821.1	PEX10	DHX30	SPAG8	PRRT2	C4orf3	MTF2	AL391261.1	PREPL	HMGN1P28	LRRC40	AC138207.4	NUDT10
	SPEG	LINC00665	AC021087.2	DDX27	AC007346.1	MIR342	MT-CO1	CZIB	MAP3K13	PLXNA4	AP001429.1	MRPS23	PSMC1	HIF3A	AL161773.1	AL022328.4	CHRDL1	HDAC5	AL445209.1	SRRM3
	CD302	GBF1	EEF1DP4	INTS1	C21orf62-AS1	SNORD114-30	CASTOR3	KRT18P55	NOP14	LINC02541	AC005696.1	IFI27L2	STT3B	BZW1P2	NDUFA5P3	COA7	AC113194.1	MIR4653	ZNF827	AC114324.2
	SLC25A35	CDKN1B	AP3M1	AP001340.1	NLRP1	AC067751.1	FXNP1	BLCAP	CSNK1G2	SLC35A4	AC090116.1	LINC01566	MARK3	SNORD46	IRGQ	RPL7L1P8	TAF1D	TCERG1	PLEKHF1	THSD7A
	AP001269.2	ARHGEF9	FCF1	AC008897.3	PDP2	VEGFD	RAB3D	SP9	GTF3C4	MRPL9P1	PDSS1	TNFRSF10A	ITPK1	ANKRD33	ALOX12-AS1	SYTL5	HSPA5	AC002066.1	SESN1	AC011595.2
	LINC00351	SNRNP48	RPS26P6	DES	ST5	AC092296.1	GNAI1	NOC2LP1	ATP5F1B	AC018643.1	AC091212.1	LINC02627	MIR9-3HG	IFNA12P	DBF4	AL353768.1	TENM3-AS1	SLC51A	AC113367.3	PAX1
	UACA	NFAT5	AL353747.2	AL359885.1	AL022724.1	ECT2	AL109918.1	TRNP1	AC012213.3	CHIAP1	CCDC142	SMIM15	TBX6	TMSB4Y	AL080276.2	EMC1	MYC	TDGF1P3	ZSWIM6	AP000662.1
	AC020661.1	TEX261	AL136162.1	CASC2	BAG4	KANK2	AL133467.4	AL357375.1	BACH1-IT1	CYCSP41	LHFPL3-AS2	EIF3EP2	BX255925.1	RPLP0P6	44261	NKD2	PRND	RGS22	OR2C3	AC115837.1
	AC010207.1	FBXW5	AC120042.1	CASC9	ABCC5	PSMD1	PDE4D	ITPKB	SNTG2	PGAM1P2	RNU6-698P	SREBF2-AS1	SGSM3	AC090095.1	DFFA	C9orf92	APBB1IP	AC015813.3	RPL30	LRFN2
	AP003486.1	AL136131.1	AC138305.1	BTC	TMEM130	AL031666.1	SERPINH1	MEDAG	AC011498.7	TTC5	OR8D1	FES	AJ011931.1	PRKCH	TEX29	CDK4	PTENP1	AC090796.1	RNASEH1-AS1	HELLS
	AMMECR1	RNU1-115P	NFKB1	AL392112.1	KCNJ12	KLHL10	RNU6-1178P	WNK1	AC078819.1	AC097515.1	MMP8	RN7SKP192	MIR370	AL513478.2	AC135584.1	AP000593.2	TRIM4	WDR46	AL159169.2	GALNT2
	NOL4L	FCRLA	SURF1	PDCD6IP	AC002070.1	SELENBP1	PTTG2	GNRH1	AC008443.4	EYA1	FNDC3B	PDPK2P	OR4F13P	SRFBP1	TPSB2	C13orf42	FAM120AOS	SEC11B	ZNF487	AC020629.1
	RNU7-18P	MIR100HG	NKX2-1	AP004609.3	AC004461.1	PSMB8	IL36G	OR2S1P	CD36	NCLN	USF1	OSR2	FAM133A	ARL15	SLC25A36	AC092798.1	POLR2D	NUDT11	SMDT1	AC087664.2
	PRDM6	BSX	AL158201.1	AP003469.4	ZNF474	C12orf66	C4orf33	AL121917.2	AC096540.1	PTPRA	MAP3K1	KDM4D	LEF1-AS1	AC092614.1	PROM1	TFCP2	AKNAD1	NONO	SF3A1	CNTD1
	LINC00884	ZFAND4	SPRYD7	RPS26P3	ALG10B	AC010255.1	LINC00663	ADSL	NKX6-1	RPH3A	HRASLS5	CELSR1	GDPD2	AC007792.1	BTAF1	AC103855.3	PODXL2	KISS1R	AGXT	FAM45A
	AC020915.4	LINC01270	LINC00922	OR5E1P	C12orf77	GUSBP11	FRG2JP	VAMP8	AL512324.1	COL4A2-AS1	TMCO5B	CRIP2	CCDC144NL-AS1	WDR87	ARRDC4	CICP3	NAPSB	HMGN1	MIR4323	VPS18
	ZDHHC16	EBLN3P	ID1	SPATA2	SNORD114-14	CCDC13-AS1	FRMPD3	PPDPFL	NR4A3	CKS1B	MRGPRF-AS1	PSMC6	AC073585.1	TRAM1L1	PCAT7	DHRS2	RAD54L2	AL355916.2	POLR3D	SLC12A2
	PLOD3	PURPL	AGAP1-IT1	AL589743.1	TRPM2-AS	LINC01023	CAMK2A	AC011445.1	OR7E156P	TMPRSS15	AC022832.1	DAPK3	FAM155A	SLC26A4	AP000842.3	CERS2	AC005785.1	AC073346.2	SNHG17	LINC01518
	U62317.1	MYO10	PCDHA4	AL359551.1	AC096564.1	AC074031.1	ABLIM1	AC007036.1	LINC02671	AC090049.1	LRRC70	ZNF771	COTL1P1	FHL5	AC103858.1	IGDCC4	MIR4482	ING5	AC016747.1	PKN1
	TSKU	DHX16	RNU6-77P	TLR3	TMEM238	PDLIM7	ATF2	AC010533.1	ADAMTS12	SNHG26	AC104964.3	RIDA	BAG2	COG3	GAPDHP1	RRN3P3	AC102953.1	GTF2H2C	RNA5SP175	SCRG1
	PEX5L	AL162574.2	EEPD1	DNMBP	SLC26A2	AC008687.4	AC020765.2	AF038458.3	OSER1	CPEB4	JAM2	RPS4XP23	LINC01612	AP001267.1	NRARP	AC016583.1	AL391097.1	SNX13	ZNF124	ORC5
	EIF3H	CDCA7	LINC02144	ZNF271P	CICP16	ADAM5	SDK2	FAM153C	QSER1	TEKT3	AC007998.3	SLC16A7	NR1D1	SOX18	CXXC1	UTP25	TPM2	NRG1-IT1	LINC01115	NLE1
	WDR20	ZFP3	ARHGAP22	ARL10	OBSL1	HSPE1	FAM89A	AL109947.1	AC098936.1	AC073862.2	STX8P1	BUB1	XK	AL357832.1	CREB3L1	TMEM196	LINC01353	NXPH4	FAM163B	AC009955.2
	PCMTD1P2	INTS13	HUNK	MIR3677	ZNF107	HNRNPLP2	C7orf33	RPSAP5	SERINC5	SUCLA2P2	NSD1	TSHB	FOXM1	SAMD8	DUXA	CACNA2D2	AC116609.2	MFAP4	SIDT2	AC097534.2
	PCAT19	TP53BP2	RNF217-AS1	AL445307.1	AL157904.1	ALOX12	CPO	STIM2	AGBL3	LRRC8A	AC006329.1	PMVK	GIMAP5	SLC38A2	THAP4	COX17	TXNDC16	RPL38P3	AC133644.2	AFAP1L1
	SNORD114-9	RAB11B	ARHGAP20	TRIM44	SETD2	CTHRC1	LINC01433	RBBP7	AP000866.2	AC073910.1	AL157373.2	MEMO1P4	NEAT1	VENTXP1	CCDC74B	LRTOMT	EPHA3	AL451165.2	OPN3	CST3
	RPL17	NUCB2	AC080188.1	AP000697.1	RASSF8	AL360270.2	AL512638.1	GCOM2	CFAP20	LINC01143	AL121890.4	MEF2C-AS1	CRIP3	HNRNPA1P7	CSAG4	AF127936.2	KIAA1755	AC139530.2	RASA2	DKK1
	NT5C2	QTRT2	MFN1	CASR	AC107302.1	PTK2	SF3B1	TRIM67	AC004828.1	LINC02246	NAGPA	LINC02449	MRM2	RPSAP18	OPCML	MEG9	AC005261.4	AC015911.7	AL135746.1	COLCA1
	PAQR7	Z82195.2	DPF2	RAC3	RBM22P4	GYPC	RPS29P17	ZBTB4	CAPRIN1	AC011287.1	NCOR2	VPS33B-DT	LINC00377	C1D	ENAM	ADGRE1	IPO9-AS1	AC060834.1	MIR5698	PRELID3B
	GALNT15	FRY-AS1	TCIM	SYT16	AC126177.5	ATP6V0E2-AS1	SDSL	TBC1D3L	AC107463.1	OTUB1	AC026401.3	VN1R34P	AC136285.2	ZBTB16	CYCSP45	DUXAP7	DYNLT3P1	AC008937.1	AL445471.1	MMP28
	SNORA71B	TPM1-AS	C17orf82	AC016405.1	CDC20P1	RPS26P35	AL109615.2	TMIE	IGF1R	CTAGE11P	AC090948.1	LINC01117	NSG2	HNRNPH1P3	MTRNR2L12	PANK1	AC007563.3	AC004812.2	AC068631.1	NET1
	RPSAP2	MT-ATP6	AC023300.3	AC079031.1	C8orf86	GPR37	AL035414.1	NTM-AS1	AL162377.1	RNA5SP165	MIR4697HG	MGAT5B	AL022328.3	AC036176.1	AL391095.1	AC018755.3	SORBS2	CPA3	MBNL2	AL121759.1
	AC073172.2	RRAS2	FAM50B	GOLM1	ODCP	LDHAP1	FERMT2	NEK2P4	SNX18	AC097478.1	FABP5P1	ERLIN2	NRIP3	COMMD3-BMI1	AC079922.2	AC067817.2	KIF21B	AC012307.1	BST1	MR1
	SBF2	SATL1	VHL	CRYGC	AP004607.4	LINC02074	HSPB1P2	AC009948.2	APOL6	AC004837.3	LRCH3	IMPA1	SLC37A1	CFP	CERS4	AC090844.2	SEPHS1	AC069209.1	BOLA1	AC007638.1
	LINC00954	SUPT16H	CYP4A11	DLGAP2	CACNB2	FASTKD2	KLHDC9	KPNA4	GOLGA8N	AC103770.1	TMEM132D-AS1	CILP	TIGD1	TMEM62	ALKBH7	CENPF	AP004833.2	RNU6-970P	RPL12P27	AC129492.4
	AC119396.1	FOXP4-AS1	PTPRT	AC109466.1	NMRAL1	SYNM	COA6-AS1	SLC40A1	ULBP1	CBX2	LINC00866	MS4A6A	AL360270.3	FAM8A2P	AC008438.1	MLEC	AC009275.1	AC134043.2	AC073325.1	TOP3B
	P2RY6	IGLV11-55	STXBP5-AS1	CYP1A1	IL17RC	ZNF445	KDM5C	MBL2	AL445649.1	AL049597.2	PGAM4P2	CTSLP1	HIPK4	LNPK	TPRG1-AS1	LYPLA1P3	ADD2	OR52W1	ATP6AP1L	STX8
	AL163636.2	ESRP1	DCAF7	LINC02608	CTSG	PLK1	AC010320.1	NEK4	AC004006.1	THAP12P7	DARS	AKAP6	NELFCD	KIAA0040	PPM1K	AC005261.5	GPR158	ZNF491	KIAA1586	KCNK13
	ENTR1	RPE	TIA1	PGRMC2	TTC4	LINC02631	AP001816.1	AC004947.1	AC241644.1	FNIP2	ZNF433	KIF5A	AC027601.2	AC004678.1	TRPM8	FAM181A-AS1	ADAMTS6	ST7-AS1	NECTIN3	MGARP
	ERCC2	GOT1	PSMC1P10	LINC02336	AL449423.1	GRIK1-AS1	HTR3E	AC106782.6	PPIF	RDH11	NR1H2	AC002056.1	PLB1	AC026320.1	CBR4	TRAF3	AC087071.1	AC026412.2	HNRNPA1P35	POLR2M
	RAB1A	USP36	AC105020.5	SUGT1P1	COPS7B	AC034206.1	AC116562.1	BMPR1B	AC079597.1	TPRX1	AC106028.3	AL049828.1	MIR22HG	AL133492.1	LINC01637	C3orf80	SLC25A13	B4GAT1	LINC01359	LINC02303
	LARP7	AC087499.5	RPS26P28	TTC3	FMNL1	PLEKHA2	AL356804.1	BAZ1B	SLCO4C1	CCRL2	RN7SL261P	MIR4474	MDC1	COX19	AC004223.2	PLEK	AC007225.1	AL109930.1	NIPSNAP1	AC130371.2
	NT5C3A	AL359764.1	AC015468.4	AC073862.5	DENND3	AC005911.1	LINC02129	AP002383.4	LAYN	KRT18P5	MIR4536-2	LINC02462	FAM126A	TP73	AC009690.3	ZNF584	RN7SL272P	PLCG1	SMARCA4	CRKL
	AC022415.1	UBXN10	TNKS	KLF15	HLA-DMA	SEPT2	AC092376.2	F2RL3	LINC02045	AC073347.1	MIR29B2CHG	POLD1	SULF2	ZNF30	RPS26P13	AP005328.1	AC146944.4	VN1R10P	DERL1	ITGA1
	OR51B8P	RYR3	AL358332.1	SLC43A3	LPAR1	TOR1AIP1	AC115099.1	GET4	CAPSL	MGAT2P1	LRRTM1	AC068594.1	OR51B4	AC023824.3	AURKA	TMEM184B	CCL19	CCT3	AC069061.2	SNORD67
	LETM1	SLCO1A2	RHOBTB3	CPXM2	MRPS31P5	STK17B	USP19	DDB1	PROB1	MTMR9LP	LYPLAL1-DT	LNCTAM34A	AC010163.2	AC020910.2	HNRNPA1P73	AIG1	RNF31	ARMC4	APLNR	LINC01358
	PIK3IP1-AS1	GJD3	ASS1P2	VAX2	AL160408.4	AC091198.1	MIR8083	PLOD2	UFL1-AS1	SPINT1	PSMB9	AC073464.1	AC007823.1	STK25	AC009108.4	PSD3	MYLK4	GRK5-IT1	CINP	LUZP1
	AC106744.2	DLK1	AC138150.2	AL390964.1	TMEM161B-AS1	LAMC2	EPB41L3	POLR2A	MAML1	CBLL1	SLC20A1	HLA-E	NMUR2	KIF23	CSGALNACT2	AC109587.1	ONECUT1	AC008637.1	ARL14EPL	ZNF563
	GUCY1A1	PPEF1	RNU11-3P	AC009110.1	SRD5A3	TNFAIP8	TARBP1	AL590235.1	GCNT1P4	FAM133B	GPR4	AL732372.2	MUC22	FAM193B	KALRN	AC023511.1	LINC00538	PI4K2B	CHST7	MTND5P6
	GPRC5A	ZNF322P1	LCE4A	AC021752.1	KMT2D	MYNN	MAGED4	AC092720.2	AC099343.2	AC021242.3	PPIAP39	ZNF12	EP400	MIR4735	BHLHA15	AP001065.2	AC105118.1	AC006145.1	MIR4504	KRTAP5-3
	AL445465.2	TICAM1	RTN4RL2	AL353708.1	HSPA8	AC073349.1	SDCBPP2	KLHL30-AS1	AC008525.1	LINC00618	ACAT1	RRAS	MGAT5	CIAO1	SDR42E1	SLC2A10	AL021407.1	AGFG2	UBE2Z	TOMM20
	MRPL30	AL078604.2	CPSF4	AC019159.1	AL513548.2	MCF2L2	FUS	LINC00229	RN7SL749P	NCF1C	TMEM189	C17orf53	PTDSS2	GEMIN7-AS1	HNRNPA3P5	GINS1	PLEKHM1	MAP1B	EPHA7	MIR4779
	NDUFB1	AFG3L2P1	LINC01765	LINC01834	VPS8	ZFAND2B	GLT8D1	ZNF197	A2MP1	ASMT	AC126323.6	CELA2A	AC004691.1	LINC01705	SOX1	AC012572.1	AC091891.1	LYPD5	RARRES2	DVL1
	MIR100	SUCO	SNRPCP3	TNNT1	LYAR	LINC02506	AL162376.1	AC099811.1	GRIN3A	SV2C	TSPEAR	FRK	AC001226.1	CACUL1	RPS10-NUDT3	EFCAB2	HLA-B	CYCSP24	UBALD1	AL358394.2
	PHACTR2-AS1	SHISA2	SLC7A5P1	AL596087.1	RSPO3	AL445072.1	AC117522.2	AL672032.1	HILPDA	RN7SKP52	SET	PRPF4	AC140125.1	LRFN3	AL669831.4	AL450998.2	BIRC3	EPHX1	LIPJ	ZNF839
	VAMP5	BPHL	AC027271.1	RPL36AP26	AC026691.1	GFM2	MT-CO3	FCN3	C1orf21	AC114744.1	EEF1E1	TCEA1P3	AC009093.7	AC083806.2	AC025271.1	FAM86C2P	AC008109.1	HMGB1	PIGW	CCNB1IP1
	AC131055.2	ADNP	AC010105.1	HMGB3P20	AP003392.6	AC000123.3	AC027688.1	KANSL1-AS1	RN7SKP296	AC016700.3	IGLV10-54	SNORA23	FAM222A-AS1	AC008522.1	SMR3A	NDUFA3P4	HNRNPA1P37	UBTFL7	AC012085.1	EEF1AKMT1
	AL592429.2	AC239584.1	CR383656.4	AC137834.1	NFATC2IP	FBXL14	ABI3BP	DHX29	PCMTD1	THBD	LINC00605	AL355001.2	KEAP1	AC145207.7	AC104794.4	FCER1A	AL391095.3	AC096745.1	AC102945.2	LRP8
	AC114939.1	MT-ND5	SPINK8	ZNF669	AC010886.1	CGB2	LINC00524	AGMO	AL021368.3	AC078925.1	AQP3	AC109830.1	LINC01682	RANBP3	ZCWPW1	SORBS1	CIPC	SOX2	LINC01159	FAM169A
	LGI2	DSCR10	RUBCNL	ZSWIM5	ZC3H18	CD40LG	PAIP1P1	BCAR3	AC002044.1	GCN1	TMEM184C	TNFSF10	AC023157.2	AC108734.3	BSDC1	AC011604.1	FLNB-AS1	CSTF3	AL050344.1	NIFKP2
	IQCJ	TBC1D3B	RN7SL138P	AC139426.1	E2F3P2	PZP	KCNQ2	MIR6894	ZNF219	GRIK5	AC109347.2	AC022400.4	AP002807.1	TMEM119	ADRA2B	OGDH	KDELR1	AP001124.1	AC231760.1	AC105384.1
	PLPPR2	HIST4H4	RSRP1	BOD1	AC119396.2	KLHL22	SAMD11	AL445584.2	PFN1P3	TPRXL	CCT2	AGMAT	ERLEC1	KCNK10	AC008555.1	TEX101	SRPRB	AC015908.2	TGIF2	ZNF648
	AC022007.1	EP300	ADGRF5	AC008115.4	AC012146.4	AC092335.1	PHACTR2P1	CTIF	SIPA1L1	ZDHHC14	AC084116.1	MYCN	H3F3C	DAP3	TRAIP	CHCHD3P3	ATF1P1	KCMF1	AC142391.1	AL512274.1
	GPNMB	CD300LG	TSPAN3	WWC2-AS2	AL161621.1	HIST3H2BA	RPRD1B	MAGOHB	APBA2	NRDE2	LCN6	CYB5D2	MAPRE1P1	THSD1	RN7SKP119	DDAH2	IRAK1	AC145098.2	TCEA3	RASGRP4
	TLE7	SNORA11F	TMEM240	POLR1C	SRD5A1	IL15	MAGEA10	AC013701.1	AL627095.1	HPRT1	KCNQ1OT1	AC087392.2	AC087500.1	AC095031.1	EFNB3	EDC4	AC026304.1	DCBLD1	PPIEL	YPEL1
	H6PD	CCDC107	TUBG2	NPR2	LINC02529	LY86	AC008539.1	C16orf58	NPDC1	MED15P8	AL121894.1	RHBDL3	MED17	SCARF1	AC025211.1	HCST	CANX	AC005154.5	KRT18P49	LINC02088
	AMT	AGO4	DEDD	AC007599.1	XPOTP1	AC105389.3	LINC02127	MED22	AL359962.1	VPS35P1	LINC01968	EHMT1	AC005856.1	EHHADH	AL390961.1	SPIN2A	RN7SL461P	AP004782.1	AC012653.2	AC002115.1
	MIPEPP2	BAP1	AC020904.1	TSNAX-DISC1	FAM49A	EXOC7	WDR49	NME2	AL162726.4	AC092296.3	RBPMS2	NAPRT	KLF8	AC027088.2	DUSP27	AC011461.1	LINC02552	SF3B6	COL23A1	AL450326.2
	LMBR1	PLOD1	PLCH1-AS2	CEP72	ZNF653	OR2A9P	LINC00672	FGD5	RN7SL542P	SH3BP5-AS1	LINC01665	LINC01868	MMD	AL353732.1	LZIC	TGIF2LX	LINC01551	NR6A1	PYGO1	DOCK10
	AC133561.1	TUBA3E	MTFP1	CALM2P1	LCMT1-AS2	AC008481.2	CYP1B1	AGGF1P3	KCNJ8	AC013439.1	PNMT	CORO1C	AL592464.1	PSPH	KIF9-AS1	PRKAR2A-AS1	AJ006995.1	SCFD1	ANKRD65	TTC21A
	CMA1	PDHA2	SEC24A	CST9LP2	ADH7	SETDB1	NDUFB4	PRAF2	ZC3H7B	PCED1B	CD28	AC008906.1	TPI1	MIS18A-AS1	APONP	NCAPD3	AL513323.1	HCLS1	OR6S1	RNF167
	PSMB5	POPDC3	SLC35E1	AC092070.3	SURF4	KCTD4	POLA1	MCTS2P	SNORD53B	AC004817.1	LIPG	CR769776.2	AC025627.1	PPIG	CASP1	LINC02522	PHC1	DICER1	SDK1	APCDD1L-DT
	EAF2	SGPP1	MIR548AO	KIF18B	ADCY3	AC244517.1	LINC01184	RNASE6	AC233723.2	AC102797.1	EFCAB5	RAB7B	TDGP1	CMSS1	CXorf58	TIE1	SNORA80B	IL9	LINC01416	NPIPA1
	GJA3	PREX2	CHTF18	PLXNA1	HSPG2	LCN9	TPX2	FAM49B	SLC31A1P1	GATA2-AS1	SNORA71C	AP001476.2	JRK	AL357055.3	AL139421.1	AL033504.1	RN7SL507P	SLC6A18	PTMAP9	ABHD3
	PTPN13	AL390866.1	ZNF775	NPM1P50	CLTB	TRIP13	OSTCP5	LINC02373	AL591806.3	AC068756.1	DCTN3	AGGF1P8	RAP1BP1	RN7SKP199	FLRT3	CNOT8	CTSLP4	ULK1	ANKRD36BP2	DPY19L2P1
	NUP160	ZSCAN29	AC092143.1	AC005077.1	HSPA2	AC004832.6	AL158042.1	AL139423.1	AL451050.2	AL080273.1	SLC25A15P4	ZCCHC2	SLC31A1	LCP2	AK6	AC092814.1	BX470209.2	VN1R81P	AC019068.1	HSD3B7
	GLULP4	AC019209.1	AL136040.1	AL590999.1	AC025188.1	LINC00161	AC137630.3	AC109460.3	LINC00565	HMGXB3	HHEX	SF1	RN7SL169P	LTF	RNF149	GRAP	AC073332.1	NUDT7	AP001469.2	SLC16A3
	PTPRB	TTC8	ANKRA2	C2	AC079601.1	SNX21	AL772337.2	LINC00326	B4GALT3	RBM24	AD000671.1	AL008582.1	AC004801.5	AC005740.4	DGKG	COG2	AC244035.1	AC005410.2	RGS6	AC073257.2
	FKBP10	FAM136A	AL645939.4	AC027369.6	AC023055.1	CDKN2D	AL137026.2	AF279873.1	RBMXL1	TWIST2	KLRC4-KLRK1	ZNF250	AC025183.1	AL513122.2	SKA3	GTF2IRD1	UCKL1-AS1	AL358913.1	AC024909.1	FBXL8
	AC068389.1	CEP41	RNU6-879P	DNASE2B	LINC01874	HMGA1P6	ANKRD33B	OTUD1	AC096733.2	MX1	NEIL2	ZNF350	DPP10	NIPA2	ZNF454	CR589904.1	SRD5A3-AS1	OR2M3	FOXP4	LOXHD1
	AC112498.1	MIR6819	LGALS2	AC013553.4	KIF2C	AK4P3	PARVB	SNORA71D	SPTAN1	KIAA1671	AC122719.1	AL662899.2	CTTNBP2	AC051619.7	AC007000.1	CDAN1	CDPF1	GRPEL2-AS1	AC102941.1	ZNF366
	NUP153	TRIM64EP	ATG4D	DISC1FP1	AC009570.1	EFEMP1	LINC02046	ADRA1B	MIR4263	TNK2	YES1P1	RSPH9	SPZ1	AC091181.1	NAE1	PLCE1-AS1	ZNF747	BTK	ATPAF1	OR2M7
	STX11	AC090616.1	HBE1	KNOP1P5	ESR1	RNF122	AL034397.3	C5orf15	CLIP1	TRAV33	BX649632.1	PDLIM1P1	PCDHB17P	HOXA13	PYCARD-AS1	KRT18P2	SYT3	KRT81	METTL21C	AC005034.4
	RAD9B	CATSPER3	FAM110D	CASP16P	AL133467.1	AL354877.1	AL513365.2	AC091906.1	CCHCR1	GINM1	P2RY14	SERPINB1	CEBPZOS	SAPCD1-AS1	RHOT1P3	BCO2	LINC00708	KRTAP8-3P	IRF4	AFMID
	HDAC6	TMEM31	LINC02133	HMGB1P17	AC022113.2	AC012447.1	SNHG22	MTATP6P1	MAGEA12	ADAMTS15	CFAP299	DPM3	RHOXF1	MYLIP	LINC01985	SEPSECS	PFN1P1	TWISTNB	CES1	PER3
	SMCO4	PGM5P2	NELL2	FANCB	LINC02052	FOXC2-AS1	CHPF	DEFB136	GCSAM	AC092375.1	OTX2-AS1	AP004372.1	PTGDS	Z73965.1	PRDM12	BMP4	SEC22B	SLC10A4	AL023581.2	AC006946.2
	OR10V2P	SYNE1-AS1	TLK2P1	NDUFV3	HOOK2	AC092068.2	CLECL1	SOX21	BTN3A3	ADGRV1	NEK2	CENPBD1	SEL1L2	LINC01148	AL109659.2	SNORA77	AC010182.1	AC106795.5	VDAC1	UBE2D1
	SDC3	AC139768.2	COA1	AC005884.1	IL20	RPSAP12	ZFR	REXO5	ZNF581	TLK2	AL512624.1	TDGF1P6	AC093852.1	AP000696.1	KCNK3	EPB41L4A-DT	AL121753.2	AC233976.1	LCE1F	SLC9A9
	AC090358.1	LRP3	YTHDF1	SLC16A2	NPFFR2	RNF146	AC008565.1	MCCC1	AC098476.1	AL121578.3	MOXD1	DYDC2	Z95327.2	AL591848.3	ACTG1	AC124283.2	HSBP1	AC004925.1	OSTM1-AS1	CYCTP
	AC021205.3	AC098862.1	RNU4-62P	NRTN	ELANE	INTS6P1	METTL1	AC024382.1	FTSJ3	RPIA	LINC02598	DAPK2	OSBPL6	EIF5A2	UBE2W	AC079178.1	AC004080.1	TGFB1I1	AC010275.1	AC006111.3
	AL031673.1	CCDC183	CHRNA7	P2RX1	RNA5SP402	PA2G4	MIR99AHG	MIR3117	AC092590.1	ANP32C	RF02110	NR1H4	RPS27P16	AC006967.2	AC116345.1	BCL3	AP2B1	TMEM91	MT1G	AC090151.1
	PRSS38	PCDH9-AS3	VWFP1	PKD1L1	GALC	AC022211.3	AC137761.2	HSPA4	PCDHGA11	GIN1	AKTIP	FAM129B	PHLPP2	FSCN2	UBQLNL	TMSB4XP4	AC073862.4	ZC3H12D	SLC48A1	CDYL
	PCDHA12	OR2AG2	MAN2B2	EIF4B	AL133456.1	ZNF738	TRIM53AP	CNTD2	PCP4	PSIP1	SRMP1	TMEM233	PLEKHG3	AL391261.3	AL133553.1	AL590764.1	AC010480.1	NAT1	TCOF1	AC016405.3
	STIM1	JMJD1C	ZYX	HIST3H2A	STRA6	PCDH9-AS2	AC009229.1	CRY2	AC011978.1	ZEB2P1	AC005046.1	AL512504.2	SELENOKP1	SUZ12P1	SMYD2	KRTAP7-1	CBLN1	AC018814.1	NOM1	HECA
	AC097451.1	AC012640.5	AC063977.4	LINC01280	CAVIN3	METTL6	MTIF3	ZNF503-AS1	IDI1	HTR2C	RPL15P3	AC002553.2	CXorf40B	ENTPD3-AS1	KRTAP21-3	BCRP6	KCNC4	ITGA2B	ZNF101	APOA5
	TIGD7	PAPPA	AFP
Bvs.C	IGF2BP2	IGSF9B	RNF38	AC004637.1	MPDU1	MIR4697HG	PPP1R12B	ADAMTS9-AS2	MBNL1-AS1	BARD1	RAB9B	AC022893.1	LPP	AKAP1	AF001548.1	MICAL3	TP53TG5	FBXL22	TMEM252	SLC38A7
	C15orf41	SLMAP	ZNF852	ITPR1	MPP7	MYH11	KLHL42	FSCN1	PHC3	TACC2	CMTM3	SIRPA	UBR1	TMEM9B	AP003548.1	PRDX3P1	RAB3D	KANK1	AC109587.1	SORBS1
	SBSPON	MACF1	RIMS3	MIR4506	DBNDD2	AL132642.1	RYR3	TMEM208	CMTM7	MEF2D	LONRF2	AC102945.2	CCT6P1	PRUNE2	LYPLAL1-DT	ASB2	KANSL1L	PDE4D	PPP1R12A	LMOD1
	RN7SL262P	LIMK1	MAPKBP1	AL356317.1	SVIL	FAM184A	HMCN2	KLHL23	PGD	TNS1	MYLK	FAM227B	RASL12	ASH1L	JPH2	SETMAR	AC021106.3	CCP110	DIXDC1	TMEM245
	AC007114.2	KCNMB1	EPN2	KCNQ4	CSRP1	SERTM2	RASSF3	OAF	FMO5	B3GALT6	AC100823.1	OXCT1-AS1	NPTN-IT1	TMSB10	AC022034.3	METRNL	YIF1B	SYNPO2	SYNM	MMP2
	USP3-AS1	PTGES3L	STAT5B	RNF149	FEM1B	RPAP1	AC008770.3	SRPRB	KLHL11	CIAPIN1	MYOCD	SPEG	AC005180.1	B3GALNT2	BAX	AP004609.1	PCMTD1	NECAP2	AC099811.5	SLC25A40
	TRIM45	RABGAP1	MINDY2	EZH1	RNF216-IT1	KMT2A	AL163636.2	PPP1R9B	AL513217.1	AC102953.1	AC027306.1	ZNF700	MAP3K20	ABCB10	PCSK7	AP001107.5	CACTIN-AS1	PAPSS2	NECTIN2	ROCK1
	SLC35B1	UBR3	GPR135	TSPAN2	TRAF5	PTBP2	PGM5	SPDYE18	RSBN1L	AC005180.2	CDKL1	KCNH2	AC108718.1	BLOC1S2	KANK2	AC011472.1	TMEM56	ADAMTS9-AS1	FAM13B	C8orf88
	AL109955.1	WFDC2	ZNF572	ITGA8	SLC51B	GOLM1	GATAD2B	ATP2B4	SCAPER	ITPR1-DT	CYBA	SIN3A	DMD	TTYH3	AL161457.1	AP000907.2	MFSD5	AC053503.4	CNN1	ZNF658
	AC022034.1	LSM11	COTL1	TMED9	AC021106.1	TSPOAP1	RTF1	PLA2G15	PRKAB2	TSSK4	SARM1	KMT2C	PCOLCE	AL139412.1	FGF13-AS1	RNF19A	KAT7	RAP2C-AS1	CREB3L1	ZNF337
	GRIK5	OSTC	MRVI1	DOCK3	CASC3	MIR497HG	TSHB	TTLL7	AC021785.1	AC060780.1	FHOD1	KLHL10	MRGPRD	DPY19L2P2	ATL2	LIG3	ADAM22	DUSP19	TCEAL1	CKAP4
	SPOP	BRIP1	SLC8A1	TTBK2	IFNGR2	AR	FRMPD3	SLC35C1	MARCKS	AC010203.1	C3orf70	AL450263.1	COL4A6	CIPC	CCDC9B	LINC00578	CHRDL2	SRM	CTDNEP1	FAM53C
	FNBP1	MAPK4	PYCR1	NECAB1	ZNF891	DAB2	TOM1	ZBTB26	ARL4C	HMGN2P19	PLXNA4	FLNB-AS1	AC011472.5	SSU72	AHCYP2	NR2C2	ZNF561	KIAA1143	SETBP1	CARMN
	AUP1	AP001767.4	LYPLA2	SH3BGRL3	ADPGK	PRR5	ACP2	ATP6V0D1	ZNF620	PAK3	AL136979.1	PKD1P6	PDPN	ACTA2-AS1	MYO9A	LINC01018	TM2D2	XK	SLFN13	HYAL2
	AC242426.2	CACNA1C	FAM185BP	TRIM46	AL121753.1	ATL1	SPANXA2-OT1	GKAP1	DGKG	THY1	AC015845.2	PATJ	SDF4	LNPEP	ISOC2	ZNF519	MYBL1	RFFL	NOS1AP	AL139011.2
	MEF2C-AS1	CD248	ADAMTS2	JDP2	FBXO32	AC073569.2	AC133552.4	U91328.1	C15orf62	AC083841.1	SESN2	NPC2	REEP1	ENG	POU2F1	AL731533.2	RPRD2	RPRD1A	PLIN4	ZNF37CP
	FRY	LBR	RGS19	TSSK5P	CRBN	CCDC85C	SEPT10	LRRC37A17P	AC093503.3	EPC2	SMTN	LINC01765	OSTF1	CFL2	NAV2	PDE1C	RBM24	UBR5	CHCHD1	RRBP1
	TAX1BP3	LFNG	SMCHD1	NFATC2IP	TMEM37	SNX16	AL512785.2	DACT3	AC026471.6	CCDC6	LRRCC1	MIR3164	DTNA	HSD17B1P1	TPST2	AC055874.1	AC016708.1	RPE65	CASZ1	DCAF12L2
	MTMR8	SLC1A5	FJX1	PJA2	AC018521.6	CEP68	AL354893.2	ROCK2	STAB1	IFT81	INTS3	CYCSP10	ITGB1BP2	AC244033.1	ATAD2	YPEL1	KIFC3	LINC01278	PDE5A	AP2S1
	MIR1-1HG-AS1	WDR48	ZCWPW2	MMP19	TMEM119	VPS13A	RN7SL417P	AL109918.1	RCN3	AC006064.3	RNASE1	ALDH3A2	LAMA3	NXPH3	SH3BGRL	BBS1	TPM3	PCM1	AC107959.1	TPM1-AS
	ASB16	PTCHD1	DMXL1	THAP6	EFHD2	HSBP1	USP37	ILK	PHF12	ADHFE1	SLC47A1	MFAP2	AGTRAP	PITRM1-AS1	TMOD1	ZNF337-AS1	RBPMS	PRRT2	KCNQ1	MBNL1
	PDLIM5	FYCO1	ZNF860	RIF1	COMMD9	ULK2	ACTG2	AP005264.7	YWHAE	EPM2A	TOR2A	RBM38	FAM131A	CYTH1	C5orf15	MAGOH2P	ARHGDIA	GPR161	KALRN	PLXNB1
	FERMT2	TXNDC12	HOMER3	GDF9	RPS10P7	TRIAP1	AC099677.1	P3H4	CAND2	DACT3-AS1	CTSC	ZNF774	AL590762.2	PI4K2A	LIPI	TACC1	NEURL1B	SCML2P2	AC138393.3	NHS
	LDB3	KLF8	AC138932.1	AC036108.3	GIPC3	AC099811.1	ZBTB40	AC068051.1	TXN2	NFASC	EPN1	AC018752.1	SNRK-AS1	AL139396.1	NPAT	JPT1	PIFO	ALDH1B1	UBTD1	AC008115.3
	MOAP1	AC010618.1	DERL2	AP000892.3	SMAD4	TOR1AIP1	PTGES3L-AARSD1	NUMA1	NPAS4	TSPAN4	GNA15	L3MBTL1	SLC47A1P2	KCNK3	AC069213.2	RALGAPA1	AC005358.2	SYNE1	PBX1	PLAUR
	FCGRT	STX17	CD14	NADK2-AS1	ZNF174	GMFG	MAOB	AC008429.1	AC012651.1	AC069224.1	FKBP11	TRAPPC2	GPRASP1	CEP97	STBD1	SVIL2P	NT5DC3	ZNF333	PXDC1	MYDGF
	MXRA8	LMTK2	COLCA2	AF001548.3	PIAS1	BID	ADCY5	FAM85B	AP003059.2	GNAZ	B4GALT7	NACC2	FOXN3	AC007787.2	FNDC4	CICP14	AL354893.1	COQ7	C4orf48	AC012676.5
	CYB561D2	PGM5-AS1	GABARAP	AC099811.4	DNAJB12	CBX7	PPP1R14A	TNNI3K	PSIP1	KDELR1	SLC20A2	LANCL1	VAMP8	AC138474.1	AC012085.2	MORN5	SEC61A1	FAAP100	SAR1A	CYB5RL
	FAM57A	CEP295	GNAO1	DENND4C	AC090844.2	KHK	LYNX1	FAM129A	NANS	EIF5A	SNX8	AP003071.2	CYB561	HAND2-AS1	SOWAHC	TK2	PPP1R12A-AS1	PHKG1	FHL1	CCNE2
	DMAC2L	AC093495.1	MARF1	POLD3	CNDP2	DAAM1	TXNDC16	IGFBPL1	AP002907.1	SLC39A7	KY	GPX1	C5orf24	TSPAN17	AC096677.1	AC013553.3	EXOSC1	AL031846.2	PDE3A	POLK
	AC108010.1	HEY2	AC080038.1	CEBPB-AS1	PCP4	TSPOAP1-AS1	EOGT	PPDPFL	AC136604.2	OTUD7B	CARF	SERPINF1	ARPC1B	AC012065.2	SYNE2	AL161457.2	AC007000.2	ST5	DCST2	FAM45A
	TRIM23	TPPP	ENTPD1-AS1	HSD17B6	GOLGA2P5	KIAA1958	PCF11	RHBDD2	ADA	RPTOR	AC100821.1	ZNRF2P1	LINC01058	FAT3	KIAA0895	ATOX1	SYT11	NEU1	MEF2A	PPIB
	TEAD1	SETD1B	HNRNPH1P1	PLN	E2F4	DZIP1L	DSTN	STK10	ABRACL	PTGES	AC069213.3	SCAI	ZNF181	RNF112	ADRA1A	NCF4	CHPF2	AC011247.2	NCOR1	DIDO1
	DYRK1A	ESYT2	HCLS1	ZNF461	AC122129.1	HEATR3	BVES-AS1	NHSL2	TNRC6A	CASQ1	SEC61B	GALK1	CDC42EP3	AL132765.2	CAP2	AL445931.1	CKMT2	LAPTM5	NSRP1	SRPX2
	PUM2	KDELR3	AC253536.3	AP000802.1	ZDHHC23	AKR1B1	CPVL	MUC1	DCN	TBXAS1	CALD1	CNPY3	PAWR	NFYC-AS1	FLNA	RNPC3	AC091906.1	VPS45	AC022150.4	MAP1B
	L2HGDH	SPOPL	MKLN1	AL139317.4	ZNF844	PRKAA2	APH1A	LMO1	ZNF407	RUNX1	NXPE3	ZNF558	SSBP2	HERC2	S100A9	RBM41	AL133227.1	FCER1G	MRPL17	PLXNB3
	IL17B	ODF2L	FUOM	SLC47A1P1	TNFAIP6	TUBGCP4	PDZRN3-AS1	IDH1	AC243562.2	TIMM22	AC020634.1	MTMR11	FILIP1	COPZ1	UBE2J2	ARHGEF26	TAF5L	PLTP	METTL24	KLHL30-AS1
	FAN1	AC022893.3	AL365181.4	PM20D2	P3H1	GID4	TJP2	ARPP19	KLHL30	ACVR2B-AS1	AL450332.1	AC010834.3	RASD2	GPSM3	PDPK1	SLC29A3	ANKRA2	AC025627.1	APRT	AC107871.2
	STXBP5L	RPL28	KHDC4	AC036108.2	AP003059.1	CDC42EP5	AL160412.1	CPXM1	SIGLEC9	AL627171.1	PPA1	AC013403.2	ZNF621	DZIP3	TRMT10B	TPM1	NBEA	KCNMA1	TYROBP	TAF9B
	HIPK3	ANPEP	ZCCHC2	HSPB3	PALM2-AKAP2	CCDC81	AC024075.1	FMNL1	ACTG1	KLHL13	CASQ2	TCTN3	FPR1	VPS13B	STARD3	ZBTB10	AL589765.7	RO60	TIMM13	CYFIP2
	RBM12B	TEAD3	CHST15	AC132219.2	COL4A2-AS1	AKAP6	PRR26	EVA1B	POT1	TCEAL3-AS1	NIPSNAP2	TSPAN33	VSIG4	MICAL1	C12orf54	SLC25A12	AC091185.1	AC008731.1	AC005274.1	ZDHHC24
	AL022328.1	DEFB131B	TOM1L2	AP001324.3	ERI3-IT1	CRTC3	CSNK2A2	SELPLG	AKAP5	FAM181A-AS1	SLC38A6	TBL1X	TCEA1P2	AL121906.2	SOGA1	PRPS2	LINC00663	PI15	ZNF451-AS1	AC108215.1
	AC073130.2	AL355377.1	TMEM60	AC092811.1	AC004982.2	AC024267.3	SNORA77	AC138393.1	AL161785.1	ARPC3	LUM	ZMYND10	C22orf39	PLEKHG3	GOSR1	AIF1	INPP5J	MAP2K4P1	C1orf226	AGL
	AL136366.1	SPARC	GANC	AC145124.1	DMPK	SRC	ARHGAP18	LRRC37A4P	ALDH16A1	RPL17P50	COX16	AC104532.2	AF186192.2	HERPUD1	PHF19	GOLGA2P8	MIR3936HG	NFKBIE	STAG3L3	STARD9
	RPS6KA5	POLA1	SPECC1	RER1	RNA5SP78	PYCARD	ZNF382	LSP1	AC106820.5	TLK2P2	AC079848.1	CSK	C19orf57	MTRNR2L4	EFCAB13	SGSM1	ARHGEF17	AC243654.3	FUT11	SERPINH1
	CELF1	AC083798.1	SMG1P3	ZNF367	AC015849.3	FGF7P6	SMG1	AURKAIP1	UBP1	SLFNL1-AS1	SOS1	ZNF619	FAM89A	TAGLN	AC005730.2	ARID4A	SCAMP2	LINC02175	VCL	COL1A1
	AGO2	ATP8B2	HLCS	ZNF397	CCDC144NL-AS1	FBXW11P1	URB1	AC010632.1	SUMO3	AC005674.2	TRPV4	GNA11	PARM1	AC104986.1	KLHL38	AGO4	VPS13C	KCTD7	POLI	PTPRF
	TP53INP2	TSKU	PPP1R14BP3	GLT8D1	ZNF625	FANCE	SNRPGP15	FRMD6-AS2	ZNF559-ZNF177	PHOSPHO2	EPM2AIP1	STAC2	CTSD	CORO7	INTS4P2	SLC9A3R2	SPAG7	HNRNPA3P9	AC007495.1	CLMP
	ETV5	IL10RB	KBTBD12	RAD51-AS1	ZNF233	TRPM2	HM13	ATP6V1G1	OCRL	UNC5B	CHPF	MRGPRF-AS1	ATP13A2	ZC3H6	ZSCAN32	SPI1	LY86	ZNF441	ZNF471	AP000866.1
	TTPA	FPGT-TNNI3K	PALLD	SEC22C	RNU6-882P	SMC2-AS1	AL135791.1	FCGR1A	AP000866.4	OSBPL10	ALG5	ZNF10	IL6R	AC243562.1	STON1	VEGFC	NKTR	LIMS2	CCT8P1	AC120498.3
	FTL	HMGN5	AC120114.1	GSTA7P	CNTLN	PDGFRA	FO393418.1	PARK7	NEMF	PLEKHM2	CD300A	RPL7P3	GRIN2A	CEP350	MPP2	MSRB3	ZDHHC9	STAC3	PWAR5	DDX41
	RCOR3	FNBP1P1	AC009065.2	MIEF2	IDH3A	INKA2-AS1	SLC38A1	GAPLINC	NAGK	SYK	PROSER3	GULOP	CSTA	HCK	LIMD2	GON4L	WIPI1	KCND3	RALGAPA1P1	POPDC2
	ZFX	SYNC	TMIE	YWHAZP5	MPL	B3GNT10	AC011753.4	AC015871.3	TXLNG	AC073610.1	CYTH4	CPTP	MOG	EMC3-AS1	AKAP10	SH3BP4	AC005586.2	AC117383.1	IDH2-DT	ZSCAN29
	AC126755.1	ARIH1	LARGE1	OR7E7P	RHOG	ANKS1B	AC098617.1	AL590762.1	TAOK1	ZFP28	ST3GAL5	RASSF4	AL359885.1	STAG1	PPM1L	THAP5	ICE1	COL5A1	ADCY9	HOXA1
	RYR2	COLCA1	VN1R1	GPR85	NCOA2	MEIS2	CBL	DNAJB11	AP002495.2	AC092042.1	PIGCP1	TMEM47	CRYBB1	VMO1	ARMCX4	SHPK	LAIR1	GLYCTK	DCBLD1	PPP1R14B
	LGALS9	AL353807.4	AC103739.2	CSF1R	CREBRF	ARHGAP44	DUS2	TES	AC096564.2	FUCA2	ZNF585A	KANSL1	AC104463.2	AC124312.2	AL627402.1	MIPOL1	AC016705.2	SNORD116-24	SNORD116-4	RHBDL3
	BTBD8	TMEM86A	CCDC158	PPARGC1A	AGBL5	PPP1R3B	PHETA1	PKD1	AC090515.5	NDUFAF8	CAMK2G	SRSF9	TANC1	AL359397.1	AL590617.2	CCDC146	DNAJB5	AC013439.1	KMT2E	MAMDC2
	PARD6B	MAGI1	DNAJC24	TNRC18	ZNF585B	AP002490.1	SSR4	MPDZ	ADAP2	HK3	BCOR	SENP8	LINC01841	SLC4A7	ACTA2	GPD1L	RNF169	RNF150	YAP1	KDELR2
	UBE2E3	NALT1	AFF1	DCTD	APMAP	CXCL16	AC005261.3	LINC01592	CD63	TNFAIP8L2	RILP	AC138207.5	CELSR2	NPC1L1	P4HA1	IPP	UBE3A	OR5K2	CREBBP	RALB
	AL132765.1	ARTN	MITF	WDR31	EMSY	LINC01828	RNA5SP18	WDR76	PSAP	SLCO2B1	MS4A4A	AC097534.2	METTL15P1	GLYR1	AC120498.1	NME1	LTN1	CLIC1	RPS24	AL391822.1
	SH3TC1	CFAP20	AC018638.8	RBSN	IKBIP	EPPK1	CD300C	NIPAL4	ASGR1	FOLR2	AC092687.3	C1QA	C1orf162	SCRG1	AC025280.1	PTRHD1	MTUS2	COX6B1P4	SURF4	SDF2L1
	RPL23P2	AC015971.1	NRBF2	MTCO1P28	GLA	LINC00670	LRRC32	TADA1	CDK6	AOC4P	WDR88	RF02271	TP53I3	IMPA1	CEP44	OSM	HMGA2	MTND1P8	DTX2P1-UPK3BP1-PMS2P11	MRPL20
	ERP29	CHIC2	AC111182.1	AC117489.1	C22orf23	SOCS3	KLHDC9	ZNF658B	POLR2L	VN1R108P	AC096564.1	LINC00844	DOC2GP	PCDH12	NNT-AS1	FERMT3	MXRA5	THRB	YIPF3	PTPN6
	SMC4	ZNF548	AMOTL1	UBE2CP2	CSF1	SLC43A2	FAXDC2	CACNB2	NPL	MYOM1	AC069213.1	RBX1	TSGA10	GPR137B	AL049869.3	CHID1	MAPT	CTNNBIP1	CDS2	BDP1
	PPIP5K1	ALOX5AP	CASP4	RBM14-RBM4	PPP4C	DUSP23	KIF5B	TTC3P1	KLF16	CD68	RPS2	P2RX1	SPSB1	AP003392.2	ALDH18A1	AC107079.1	ASB16-AS1	TCEAL2	AL121906.1	C1QBP
	DIAPH2	NPNT	LINC01797	PLCB2	AC073611.2	DPY19L1P1	DMTN	FAM20A	UBXN2B	SCAND2P	LONRF1	ZNF791	WDR46	SELENOF	SPATA4	METTL1	WAS	RAB20	GALC	PPIG
	AF186996.3	SP4	AGPAT5	AC124312.3	WDR44	ZNF710-AS1	AC125611.4	TRMT1L	PARVB	AC139795.1	CD276	SAT2	PRSS27	AC087752.2	TARBP2	PLBD1	CASP8AP2	AP1S1	DOK1	MAN1B1
	ZFP62	P4HB	UCHL1	HSPB7	ARMC8P1	PHF23	KIFC2	NCKAP1	DOP1A	C1QC	AL513122.2	PDCD6IPP1	EPHB1	LYRM7	AC005920.4	AC018638.4	CDC73	LASP1	EBPL	FAM192A
	COX20	RAD54L2	AP003392.1	PLAC9	ZNF248	AC091152.4	AC013553.4	MYEF2	LINC02094	C9orf3	ZNF33A	MXI1	LDLRAP1	SPIN4	THEMIS2	FBXO28	HECTD4	ZBTB16	AC016026.1	RELCH
	MIR3936	AC115989.1	STAG3L2	FAM13C	AL078645.2	MID2	PEX1	ZNF292	AC011815.3	FNDC10	AC018832.1	GLMP	HM13-AS1	VXN	TPR	RCC2	LMBRD2	DDX59	MTMR12	SRF
	ADAL	AL139300.2	HCFC1	AC099336.1	CICP16	TNFRSF1B	GARS	DCUN1D4	SFXN5	ST14	AL359510.2	SMCR8	PLCB4	SPATA46	EMP1	SCMH1	CDKN1B	TMCO1-AS1	ICE2	NCLN
	GSTO1	RHOC	PRKAG2	SNHG14	LRRC25	OXCT1	RNASE6	PIK3C2A	GSN-AS1	GPX8	RDH5	UBALD2	TENT5C	HAVCR2	BLOC1S4	KIAA1614	EPHX2	MYORG	AL133367.1	AC008764.2
	ANKRD40	AKR7A2P1	AL139220.1	SLC25A25	GAS1RR	STX4	FBXO30	AC090515.2	PRKAA1	ZNF623	AC083843.3	STRN3	TNFRSF10B	SLC25A39	LRRC7	RAMP1	ACAD11	PQLC2	NT5M	IRF6
	IL10RB-DT	IL1R1	PPP1CA	CCND2	FRY-AS1	TRIM33	AP003486.1	SYNE1-AS1	ZNF573	AGAP11	GPATCH2L	CPEB4	ARMC1	SUCLG2-AS1	LSMEM1	ZXDA	MFSD1	GUSBP2	ZNF770	NCKAP5L
	CAMSAP1	ZNF829	ATP6V0B	BNIP2	SCRN3	AC009549.1	FMR1	ZHX2	EIF4ENIF1	SNRPF	PRKD1	AC074138.1	AC099681.1	EPB41	CHMP6	AC010754.1	DNAJA3	STAG2	ERCC4	ZNF699
	AC087163.2	AC011767.1	SHROOM3	SUPT20HL2	ERV3-1	PPIF	BVES	FKBP1A	PRDX5	UXS1	AL357079.1	CD4	MLLT6	C1QB	DOLPP1	AC104564.3	LIN9	YWHAZP3	ADCY2	ARL11
	ZNF445	SPON2	LINC01770	LRTOMT	MRI1	LINC02611	AL049840.1	HDX	AC139256.2	ZNF787	SLC10A5	UROS	SNORD116-2	HADH	EVI2A	ZNF346-IT1	FAM86B3P	RNU6ATAC24P	AC092641.1	HERC1
	ERVW-1	AC027514.2	EMC8	YIPF1	HTRA3	ZSCAN23	AC126773.2	TMSB15B	AC067750.1	IL2RA	MS4A6A	VASN	AC007619.1	PTX3	AC053513.1	PSMB10	CCDC85B	MGA	AKT1S1	AC009065.5
	RGP1	AC009120.3	RB1CC1	RPL39	PSMC3IP	DEF6	CCND1	RAB4B	GBGT1	ANXA2	TGFB1I1	AC100830.2	AC006333.2	FAM111B	CH25H	XPNPEP1	TERF1	PFDN5	RIN1	AC010136.1
	LINC00623	YWHAZP4	RPSAP52	AC138392.1	DNHD1	TMEM41A	MTR	ZC3H12C	LINC02373	NT5C1B	ATP6AP1	RBMXL1	PTCD2	FAM78A	CERS3-AS1	FAM218A	AL021707.8	LINC00702	ZNF236	AC067817.2
	MOGS	NRBP2	INPP5A	MECP2	AP003108.3	GNRHR2	HMGA1	AC018647.2	MAOA	SOCS2	AP002026.1	CD33	ELF2	ITGAM	SHPRH	CLEC2B	ZMYM1	SLC1A3	AL391422.4	RPL13
	RIMKLB	ATP11C	TECPR2	STN1	LRRC8D	RPS9	SOCS2-AS1	DDOST	MFNG	CD163	INKA2	CASP16P	FBXL7	RAB23	RAD50	AL353743.1	PRSS36	GALNT1	ZDHHC16	AC092068.2
	ATP6V0E1	LST1	ABCF3	CCR1	FUCA1	MLKL	PLD3	RBM5-AS1	AOC3	ALMS1	CHD6	LRRC57	HMGB1P39	CORO1A	ATP5MF	AC008443.4	TNIP2	AC026355.1	NEXN	AL365259.1
	SPDYE19P	AC104463.1	CHN1	ZNF567	KLHDC2	EP300-AS1	SGIP1	COLEC12	PPP1R3C	FAM8A1	IDUA	KAT2B	ENAM	CCT6P3	SMPDL3A	C14orf28	MUS81	ATP6V1F	TMEM256	AC091132.5
	RNASET2	CAPN7	TMEM56-RWDD3	LAT2	TLR2	AJ011932.1	GOLGA8M	UBQLN4P1	MRPL27	AC008537.2	STARD6	AL583832.1	DCAF12L1	LINC01376	RNU7-13P	NIPA1	AC025043.1	ARL4AP4	DNAH11	DDX46
	AP001347.1	CALR	AC242376.2	KNTC1	ASAP3	OSCAR	PHLDB2	AC010615.2	PI4KA	AC106786.2	NANOGNBP2	ANKRD36	AC100774.1	PDIA4	PHF7	BX119917.1	SLC24A3	SUGP2	GRN	FCGR2A
	OGFOD3	TAPT1	RPL13A	RBM12B-AS1	ADGRL3	PILRA	NOTCH2NLA	RELL1	NINJ2	TCF23	SUZ12	SH3KBP1	NINJ1	RASGRP4	FAM219B	PQLC1	LENG1	AC239868.1	AP000911.2	PAXBP1
	B3GAT2	CREBZF	LINC00888	KIAA0753	MED11	ARL17A	CREB3L4	PGAP1	RFX5	TMEM206	LINC00910	COL4A5	SUSD5	ADD3	ROPN1B	AC091057.2	S100A11	AC016405.1	AL359922.2	LILRB4
	EN1	GNG2	CRELD2	ARRB2	KRT10	ZSCAN30	RAB3IL1	APOE	TSPAN14	ZNF385A	RNU4-82P	SMPD2	AL357075.1	PTAR1	TNRC6B	CDH3	SMPD1	ICA1L	RPS23P1	SEMA4B
	CDKN2B-AS1	MRPL12	BICRAL	PCYT1B	DHX32	AC104109.4	AC123023.1	COL5A3	C2orf15	CERCAM	AC007663.4	RPL23AP64	TUB	UBXN11	RPL11	SETD2	IMP3	ITGB2	ORAI1	MYOC
	KCNA4	AP2A2	SIL1	C3AR1	LINC02613	NUTF2	GRASP	EHD4	PHIP	CAMK1	CACNA1C-AS1	SMOX	MRPL20-AS1	SRGN	EBLN2	HIST2H2BD	BMP1	DLG3	VPS4A	ITPA
	GAS6-DT	HOMER3-AS1	AC004908.1	UGDH-AS1	CD86	HIPK4	ZNF433	RBBP6	SLC25A22	NUDT3	WEE1	ZNF44	C5AR2	CNST	PWWP2B	RPL12	C2	AC025917.1	PPP2R5A	REV1
	GALNT10	FAXC	AC008770.2	AC006971.1	AC073957.3	AC138150.1	DCST1	ZNF615	TC2N	MIR4786	NDUFB4P10	MIR186	ARHGAP9	HSPA4L	AL139220.2	PHYHIP	AC131934.1	PHKA1P1	AP003392.4	RICTOR
	AC090739.1	SSH3	ALG3	TMEM9B-AS1	CASP12	FZD2	RND3	EIF4E2	EIPR1	SLC8B1	RERG-IT1	FABP5	COX4I1	MANEA-DT	RRAS2	LINC01489	SZT2	PCDH7	ZNF793	PCED1B-AS1
	RIMKLBP2	LILRA6	AC094019.1	CALHM6	ATRIP	BBX	DAD1	CTDSPL2	PYM1	ZKSCAN8	AC074135.1	ATP1A1-AS1	ZNF37BP	CFD	AHCTF1	RGCC	RPL13AP25	AC011462.1	STRBP	KRBA2
	TTC32	DLG5	AC131212.2	MMP17	CEP70	ZNF280D	SORCS3	BTC	CC2D2A	SOCS7	HMOX1	NEK6	AC138956.2	AL031587.5	PSMD13	MORC3	AC090114.3	APOC1	GPR75	LYVE1
	AC007786.1	ZNF518B	CYBB	NFIC	CFH	OPTC	ZNF250	DCAF1	AC131009.4	HBP1	AC015727.1	RBBP4P2	ERVK13-1	RF01909	INO80	KIAA0930	ALG13-AS1	AC022272.1	CARD16	GNAQP1
	HSPB8	OS9	SSR3	FKBP14	ZNF529	GFPT2	TMEM150B	HLA-E	UXT	DBI	NRBP1	SMC1A	DES	ATAD3A	HDAC9	STK3	SEPT7P2	C2orf40	FGF7P8	LAMA5
	KDM3A	RABEP2	AC005162.2	PRPS1P2	SUN2	AL162231.4	RBM47	ACOT1	RN7SL812P	AC007637.1	LPAR6	CCL3	AC034102.6	VENTX	AL445470.1	TMED3	PSMB6	ZNF559	AC012414.5	IPO5P1
	FAM171A1	TAF2	AMPD2	USP27X-AS1	ADAMTS14	TLN1	TSTD2	TMEM160	MAPK13	PLEKHM3	FXYD5	MIIP	MYO1F	AC021483.1	GLTP	GJC1	LGMN	AL031663.3	ZNF527	TNIP1
	TFPI	JADE3	RNY3P16	MANBA	PDCD7	AL451164.2	LMO2	HNRNPA1P49	FNIP1	ELK3	GNB1	AC147067.1	WDR47	AC108463.2	RNF115	GARNL3	TBC1D22A	NDE1	ATP8B4	CYGB
	AC020910.5	ZNF711	RPL18AP7	FAM172A	DHFRP1	SRMP1	HPD	AC147651.4	AC109361.2	TRIM16L	AC068152.1	LILRB2	NFAM1	RAPGEF5	GOLGA8R	LMAN2	BMPR1AP1	AL138781.1	AC106881.1	FCGR3A
	RUSC2	SLC25A43	AL357568.1	TSPAN13	KCNMB4	BRMS1	AL359710.1	AC145098.2	AC055855.2	AC020951.1	AC092809.4	MORN2	AC026691.1	ZSCAN20	SEMA5A-AS1	GMIP	AL162231.2	ERP44	RMND5B	RALGPS1
	SPAG1	KIAA2013	MTND6P21	AC079313.1	KRT18P5	ZNF429	ANKAR	AC104123.1	GPR21	JMJD7-PLA2G4B	GPR17	SLC25A11	TAF6	CDC42EP1	PREX1	RTP1	ZCCHC18	RGS22	AL359878.1	MTCYBP21
	AL355377.2	HSPA5	AP003472.1	TTC33	METTL14	SNX17	KATNB1	SPDYE2	PSMG3	HCFC2	Z73965.1	BORCS7	ZNF142	SNRPC	AC009812.3	CPLANE1	PHLDA1	AC091849.1	ACE	AP002956.1
	ZBTB20	SLC39A11	AC090114.2	ZNF490	RBBP8	PLEKHA3	F13A1	CROCCP3	EGFL7	AL121772.3	DPM2	CLDND1	SCARF1	VAV1	IKBKE	DCXR	AL080276.2	AC004982.1	ZMAT1	AC007036.1
	TWIST2	CTNS	ZNF501	CASKIN2	FTLP2	PHKA1	ZNF439	ZNF782	ZRANB2	AC006330.1	RGN	ANO5	FAM122C	PFKP	NRXN3	GPX7	C1QL1	ARHGEF9	ATP8B3	TP53BP1
	HNRNPLL	SENP7	AC108866.1	FAM83D	MCPH1	TOB1	ZNF665	PITPNA	AC118344.1	DCAF10	C4orf36	UBA52P6	AC009509.4	IL27RA	SORT1	AC011472.4	RNA5SP139	LAMTOR1	MFSD14A	MMP14
	SHMT2	DIPK2A	AC073349.2	AC008507.2	SUMO2P15	DEPDC5	AC011477.4	SPAG5-AS1	ATP9A	MAPK10	HEXA	AC022007.1	RAD21	SNAP25	SRRM2	CLTA	CRYBG3	SLF2	AKR1C2	HCST
	OIP5-AS1	MDH1B	C1QTNF6	RNF130	AC139769.1	GUSBP4	RAC2	HS6ST1	RRS1-AS1	PLOD1	AC008894.3	AC068888.2	CDC42EP2	AP003469.2	QDPR	MYO15A	AP003721.4	TAF1	AC097460.2	ZC3H12B
	FAM185A	KLF17	AP005061.1	PHF3	AC087752.3	ARHGAP33	MIR4435-2HG	PFN1P6	DGKQ	GEMIN7	PUSL1	AMER1	CDK12	PCBD2	ZFAS1	TESMIN	SETP2	FOXK1	PLAU	CEP250
	RLF	INTS7	CD209	THSD4	RSKR	DGKH	S100A8	SERPINB6	HAUS2	AP000253.1	AC025180.1	AC138649.1	ZNF322P1	AC005746.1	AC127496.7	RPL5P30	GK5	TRAPPC2L	AC022467.1	FCGR1B
	ANKRD36C	CD53	TSPYL2	SEL1L2	SEC14L1P1	AC012313.10	LEMD2	CBLL1	RPS19	AC108704.2	B3GAT3	DOK3	AC073210.1	SEMA6B	LINC01750	TSNARE1	AL132989.1	AC109460.2	TMEM220-AS1	MYL12B
	UNC93B1	LILRB3	ZXDC	ALG14	COPE	FCGR1CP	AC015909.5	AC020913.3	B3GALT5	MRNIP	LRRC49	CNPY2	FERP1	AC009967.1	AC231657.2	PPP1R3D	IRF3	AC093423.2	UNKL	AKR1A1
	AC016737.2	RASL11A	NLRC4	AC105339.3	SLFNL1	JRK	NF1	FLI1	FAM66D	BATF	CYP2F2P	NEMP1	RAD9B	LRRC59	ABI2	DOK2	APOOL	LPAR5	NEXMIF	FCGR2B
	ISOC1	AC117503.2	GNB5	DTWD1	CAPZB	P3H3	AC007191.1	ZBTB20-AS4	DRAM1	DUS1L	TBX6	RIMS2	C5AR1	MRTO4	SLC25A4	MPRIP	AL365181.1	TMC6	S1PR3	AL589674.1
	BRI3	AC013565.1	RASGRP2	CX3CL1	PTAFR	MTMR9	AC137630.1	TP73	FBXO9	VN1R83P	ADAMTS12	CLASP1	MIR378H	MTHFD2L	DHX35	AC096920.1	PRDM5	GALNS	AP002990.1	CCDC50
	KDM3B	AC004448.2	TRAPPC13	FKBP10	AC138035.1	RPS11	DCAF8	S100A4	TFPT	PAXIP1-AS1	TUG1	RAVER1	HIPK1	SSSCA1-AS1	AZIN2	TMEM50A	LOX	TGFBI	ERI2	ZNF442
	MRC1	PARVG	AC234778.2	SIGLEC1	AP000943.3	CACNA1H	SUN1	SMARCB1	KCTD9	LINC02348	ANGPTL2	CCDC167	STK17B	RGS7BP	AC007563.2	SLC9A1	AC023355.1	ABI3	AC012531.5	YY1AP1
	Z82173.1	FPGS	NCAM1-AS1	PCA3	POLR2G	ORMDL2	NBEAL1	NOSIP	FAM3C	AL590428.1	C1orf61	AC036103.1	SEC11A	NNT	CSTB	TCEAL4	AL391988.1	TMEM250	SLC35A2	GTF2E2
	LAMTOR4	SERPINE2	AC026407.1	ZBTB37	LINC01615	AC022400.1	EIF3EP1	RERG	KRT8P47	BZW1	ATG101	DIP2C	ARHGAP45	AC234582.1	TMEM53	LRP1	RPN1	AC084880.4	USP19	C7orf43
	UBE2W	ABCD4	ABHD18	GPR84	GSS	AP1B1	MAD1L1	AC092919.2	MTMR1	GLRX3	MTCP1	PSMB7	PSMD6-AS2	MEDAG	SBF2	AL450306.1	INTS2	AC064801.2	ITGA7	PTTG2
	AL449212.1	BFSP1	EDF1	TASP1	RELT	TPPP3	FCGBP	SEMA7A	NPTN	AC073476.1	RAB1A	DST	ATP13A1	AP006621.2	DHFR	AL162586.1	GPR1	AL138787.2	AFF4	LINC00570
	HOTAIRM1	HMGXB4	AC090825.1	BOLA3-AS1	SLC25A6	MRPS16	RF00019	AC036108.1	NLRP3	AC012531.4	C17orf75	FAM168B	TXNDC17	PDZRN3	MILR1	AC013643.3	LRIG1	SZRD1	HACD2	TMEM104
	C18orf25	ORC4	CCRL2	ZNF717	MAGI3	HEBP1	FGF7P3	REXO5	RNASE2	ITGA1	HDDC3	ZNF682	AC008735.4	AC233300.1	TMEM161B	ZNF219	BNIP3P15	PITPNM3	SNORD116-1	CR936218.1
	SCO2	DHRS13	PWWP2A	RN7SL138P	TMEM200B	GASK1B	FAM66C	ZNF644	FILIP1L	MAGI2	RAB27A	AP002008.3	WDR73	AC023830.1	AC138649.4	LILRB5	AQR	SIRPB2	AC092111.2	DPEP2
	DPCD	HS6ST3	ATP8B1	AC090229.1	ITGB3	MTSS1L	ZNF197	PLXND1	RGS9	MIR331	EXT2	DAND5	APBB1IP	ZNF500	ZNF34	GNB2	SLC52A2	TMBIM6	RIC8B	WDR7
	G6PC3	SASH3	ZBTB40-IT1	AP005264.1	RIIAD1	GPRASP2	SERP1	PKN2	PNP	PDLIM3	DNAJC3-DT	ZNF562	RUNDC1	DTX2P1	LINC01460	PRIMPOL	TIRAP	ALPK3	ZNF483	UNC45A
	GALNT17	SMG7-AS1	AC104113.1	TPBGL	AC019097.1	ARHGEF37	SPG11	BMPR1A	CDK4	ZNF136	GTF2IP23	SON	AP000704.1	GALNT6	SLA	SMIM29	ADK	AP001350.1	CSNK2B	DCTPP1
	SLC2A3P2	COL4A2-AS2	RIMKLBP1	CTSA	ZNF304	AC093849.1	RF00265	DCP1A	CLEC4A	VPS39	PHEX	INPP5D	LINC02078	PPP2R1A	RIPK3	ATP5F1E	LINC01798	PBXIP1	AC016571.1	LBX2-AS1
	TTLL3	GOT1	AC004803.1	AK1	WBP1L	ZNF14	LRRC4	MYL12A	HACE1	AC087521.1	ZNF384	PTPRG-AS1	FOXO3B	SF3B5	SYNJ2BP	CAMK2N1	AC022173.1	MIER1	HMBS	MBD5
	PRR13	AC124944.3	LINC01907	CKLF	AC022706.1	FAM205A	AC060780.2	SERPINA1	ZNF614	PIK3R5	GALM	PIK3R4	RAB30	ZNF493	AC234782.4	PRIMA1	ACBD4	COX4I2	CCM2	TRPC4AP
	PRKD2	C12orf49	ATP5MPL	AC005358.1	ZNF713	USP12	SMIM25	AC002350.1	RPLP0	MANBAL	GEMIN5	DTNB	ENTPD1	SRCAP	AL022313.2	SPIN3	NECAB3	RALA	AC091057.1	AC016876.2
	CCDC51	F11R	LEKR1	MTMR4	SYNGAP1	CTHRC1	RPLP0P2	AC005562.1	XKR5	AC243562.3	AC135983.2	ECSCR	RN7SKP70	SNU13	RNF216	MAGEE1	PLSCR2	RPL10P7	RPS12	YWHAZP2
	HIC1	HLA-DMA	PPM1A	TMEM222	CD37	TRIM66	ASXL1	PDGFB	GRIN2D	TIMP1	ORAI2	ECHS1	VPS25	MSR1	TRIM6	METTL14-DT	VAMP1	ZNF302	KLHL20	SGCA
	HAPLN2	RRN3	MYO7A	TREM2	ZBTB5	UACA	ADAMTS8	AL359183.1	C2CD3	AC026471.1	DAGLA	CHD1	AC008537.3	KBTBD4	PIGF	FBXL15	APOBR	DCAF17	ANKRD20A18P	AC104109.2
	AC116552.1	DBT	PBRM1	FMR1-AS1	TMX2P1	BX322635.1	AL662791.1	ELAVL3	ZNF788P	AC123768.3	ZXDB	PTCHD1-AS	CERKL	PGPEP1	RPL35	AC107308.1	RN7SL68P	SEPT10P1	GCNT1	TSSK3
	CSF3R	SNF8	CD55	RN7SL333P	KCTD15	IGSF5	RIMKLA	AC079781.2	SNRNP35	LUNAR1	LSM6	RNU7-160P	GNPTG	ZSCAN5A	HOPX	AC124944.2	AL360091.1	ARFRP1	HUNK	LRRC37A2
	ARRDC1	HFE	OR5BK1P	CLIP1-AS1	AK9	WDR6	DOLK	SNORA22	MAU2	SIGLEC7	GSDMA	AC008915.2	PCED1A	VWA7	ACOT2	CHML	NAF1	TMEM219	ISCA2	CDC26
	YIF1A	RHBDD1	ARFGAP1	AP003472.2	EHBP1L1	AL354733.3	PLA2G10	VWA3B	ABCC9	INPP5B	VAC14	AP002748.2	DPF2	AC007566.1	MS4A7	TRIM9	RUNX2	CRYZ	CAPN6	GOLGA8H
	NUDT5	SALL2	VAMP5	AC000120.1	MIR3677	CD46	VIM	TRPC4	RPL7P13	AC027449.1	RPL22	ZNF687	TPD52L1	ATPAF1	SPDYE5	KIAA1328	CHMP1A	METAP1	AC087620.1	ZNF568
	ZBTB7B	LINC01354	FGFR2	AC073910.1	APBB1	AC004156.1	BTAF1	SPEN	GAR1	AP001107.1	ZMYM3	AL512791.2	FAM241B	PCNX1	ZNF589	NMUR1	RTKN	ANKRD50	AC020604.1	DLEU2L
	RHBDF2	AL451064.2	GJA1	AL358781.2	EML6	PRKAR2A-AS1	WIPF1	TRIM8	AP001619.1	ZNF252P	BCCIP	RPL13P12	ATF5	MATR3	STK32C	IL10RA	ZHX1	RPN2	AC009102.2	TYW3
	PPFIA2	FOSL1	SUPT6H	AC092070.2	ZNF235	AC015849.5	MAATS1	EFNB1	AC090004.1	SLC49A3	AP001931.1	MSL2	AC010336.2	ARHGEF39	JMY	DRD2	CTSS	CDC20P1	AC092295.2	KLHL12
	TIGD7	FGF13	CFL1	KIAA1109	LYN	AC130371.2	EEF1E1	RUSC1-AS1	ATG14	PODNL1	HS1BP3	AP000487.1	TPST1	RRM2P3	CALCOCO1	AC009120.1	CBFA2T2	AC084880.1	AL021707.3	MARCO
	AC027544.2	LINC02256	ADAP1	AC007485.2	RNF181	DPP8	SESTD1	AC135506.1	TMEM179	RPL6	ZNF569	AC010636.1	NSUN3	ZNF846	AL133371.2	AP001187.1	AC091959.3	MIR548AA1	ENPP7P1	INTU
	AL157932.1	AC011481.1	GPR4	CAMSAP2	PGPEP1L	ZNF354B	SNHG15	ZBTB25	MFSD3	AC026403.1	GABBR1	THAP3	C11orf96	AL365273.2	CDC42	AC020658.5	AL031009.1	AL353804.1	AC092809.2	THOC2
	TTC7A	LINC00624	TMEM167A	MAP3K11	AP000808.2	SLC25A5-AS1	BCHE	USP34	ECM1	HSPE1P5	ZNF112	WAC	KATNAL1	PEX16	LINC02339	AL161756.1	OTUD6B	KLHL25	AC008676.1	PPM1K
	FSTL3	DGKZ	CPSF7	AC132008.2	MRPL41	MTND5P1	MROH5	AL133230.1	TMEM214	ID2-AS1	NDST2	MCCC1-AS1	AC107375.1	TBL2	JADE1	AC245884.3	BRD8	TNKS	SAMD13	GABARAPL2
	AC099509.2	FTLP3	PRPH	C19orf71	ERCC1	ZNF510	SUPT16HP1	CSF2RA	IQCJ-SCHIP1-AS1	AC009487.2	ZNF287	TMSB10P1	AC027644.1	PDSS1P1	SEC61G	G3BP2	AC010422.4	VEZF1	NFX1	AC024940.1
	TMEM258	CNPY4	AL159163.1	AC006487.2	CHD2	C5orf51	AC025430.1	TXN	TNFRSF4	CEACAM21	DAGLB	DECR1	MRPS34	CIART	DNM1P51	AL353593.2	NCAPD3	LINC01094	SMARCD2	MYRIP
	LINC02005	NOP10	MLLT10	AC127496.3	FAM20B	HBEGF	AC136628.3	SERPINB1	PPP1R3E	DENND6A	CCDC152	AL450384.1	LILRB1	CLTRN	TENM3	AL512343.1	ANP32E	NBPF26	ARID5B	RASGRF2
	MEG3	DLSTP1	EFCAB7	RNU6-301P	TMX4	MACO1	AC068446.1	AC007611.1	HAND2	UBN2	RHOQP1	FGD3	AC127024.8	FSTL1	PLS3-AS1	PGR	PLCL1	AC011498.7	ARID2	COX10
	LINC02625	CKMT2-AS1	MRPL14	NCS1	MVD	AP000753.2	RBM43	PARGP1	NOM1	CD163L1	Z69733.1	AC004877.1	GOLGA1	LINC01154	TNFSF9	TTC14	WDR60	RPS6KC1	AC109460.3	AL158207.1
	EFNA4	EGF	LINC01534	C17orf80	RNU6-593P	PRKDC	AC016590.2	AL136090.1	GIN1	AC027307.3	HDAC11	HLA-DRB1	SDHC	AC092645.1	AC104667.2	PTDSS2	TLNRD1	SERPINE1	BSPRY	AC061961.1
	BCL9	ANKRD36B	AP002807.1	AGAP2	TPM2	LCP2	AC013643.2	AP002373.2	LCA5	HEXD-IT1	EVA1C	PIK3AP1	ATP5IF1	FAM20C	NBPF12	PELI2	TLK2P1	AC007342.7	RPS6KA6	MAFG-DT
	KARS	GPN1	SLC38A5	HDAC11-AS1	SIGIRR	AC005498.2	SOX18	SH3BP1	COX7A2L	HLA-DMB	STK38L	PEX12	CTSV	ZBED3	TMEM35A	KCNB1	PPIEL	AC079313.2	AC007953.1	MCHR1
	ZNF550	AC000123.3	MME	LINC01778	RIBC1	AC021078.1	REXO4	DPP3	UBE2F	NRROS	AGBL3	SDHAF2	HSD3B7	ICA1	CARD6	AC092835.1	TACR2	KIF27	MYO19	AC113382.1
	MIGA1	DEK	VDR	UBR4	SUCLG2P2	STAC	AC093752.3	ZNF654	CHIC1	SFT2D1	SREK1	CLU	CCL28	SCAND1	NECTIN3	TOR4A	FAM50A	MRPS2	C15orf61	AL359962.2
	PHF20	KRIT1	TMEM184B	CTPS1	KPTN	AC007563.3	SNHG16	LRRK2	GMPPA	ZNF630	ACVRL1	AL136982.1	NFRKB	RARS	PDGFA	HMGN1P24	GGNBP2	MPHOSPH8	RABAC1	ZNF593
	AC091551.1	RPS18	SSR2	FBXL4	RPS17	SMAGP	GLRX	MIR6819	AC025040.1	MACORIS	TAPBP	AC018755.4	AC093732.2	RPS6KA4	PSMB5	CCDC136	ARHGAP20	DMTF1	AC007731.1	AC026471.4
	PTP4A2P2	NUP133	WDR90	STXBP3	AC008752.3	PURB	AL049796.1	AC010969.2	EP300	RUSC1	CHERP	RPL23AP53	ZFP30	AP000317.1	CETP	GIMAP1	ARRB1	KCNN2	RBM33	TAGLN2
	TCEAL6	COPG1	ZNF502	SPIRE1	C5	TSPO	AC084706.1	Z68871.1	PTPRJ	JTB	RAB40A	RNU6-529P	ZBED8	AC018761.3	AC009299.2	KLHL24	AC006213.1	WFDC1	AC239859.6	SPATA9
	RANBP3L	BCL9L	RAB3GAP2	ATAD5	CRYZL1	MDM4	INO80D	AC144548.1	RNF217-AS1	AC008393.1	AL353763.1	PLXDC1	ADAM12	AC024075.3	ELOBP3	C6orf62	SH3GL1	ALOX5	LINC01619	GACAT2
	SEC13	RBBP7	KIAA1614-AS1	RDM1	FAM110A	RNU4-47P	MAP2K2	AL590762.4	AC073107.2	AC004383.1	MTAP	VPS9D1	MTFP1	AL662844.4	PRC1-AS1	DCLRE1A	MRPL35P2	XPO7	ERGIC3	AC008752.2
	ZNF554	WHAMM	LYRM4	CTSH	NCR3LG1	KRT18P17	NRAS	AC060780.3	MMP24OS	PHC1	HTR4	AC090774.1	RPS6KL1	FIBP	SRPX	AL135785.1	AP000654.1	ZNHIT1	AL359091.5	AC069222.1
	TOM1L1	AP002884.3	UBA2	AC005329.3	PPFIA4	ZNF551	CEP57	AL513365.2	SUPT16H	SYNJ1	APOL4	RAB7A	AC100793.3	AC012618.3	AC090115.1	PPIAP16	VTCN1	SCARA3	AL136982.6	LENG9
	AC019181.1	AC117383.2	ARHGAP4	AC139887.2	AC005005.3	CLIP3	PRDM6	CLEC4G	ALPL	RF00322	AC135050.5	REEP6	FAM214A	NIP7	RNU12-2P	SEPHS2	RPL27A	ACSM1	SLC2A3	MYADM
	AC108463.1	MAP1LC3B	FAM66A	KIAA0586	GGT5	RPL18	TPT1	RNF103	DCX	C8orf58	CYTOR	AC144831.1	TMEM61	ZNF609	ASGR2	LILRA5	C9orf147	SELENOS	SMIM3	UBQLN4
	RF00072	TMEM132A	TBC1D1	GPAT2P2	AC104564.1	HCN3	AC018904.1	CHST7	ANKRD26	ADH6	RHOQP2	TRIM52	LINC01503	AC141586.5	RAB11FIP1P1	LINC01138	DOK5	LINC01116	RNA5SP490	GOLGA8DP
	PCDHGB8P	ARHGAP5	PHF2	AC040970.1	TTC28	AL121672.1	TSFM	AP002784.2	STEAP3-AS1	ZNF540	CYBC1	DPY19L2P3	ACTR1A	IER5L	BAZ1B	PTP4A2P1	GTF2IP14	DTD1	ITSN2	AL109804.1
	ADGRE5	CD74	AGMAT	AL031289.1	RN7SL268P	TALDO1	USF3	METTL21A	LRRC37B	ARHGAP42	GOLGA8CP	RNF166	AC113167.1	AC072022.1	SATB2-AS1	AL109615.3	NLRP12	RANP4	AP001453.2	ZNRD1ASP
	RPL31	SCML2	AL356801.1	AL590764.1	AC008569.2	SMARCC1	KLF2	CDH11	FO393401.1	PPP1CB	OR13J1	ACTBP9	NPM3	IMPDH1P11	AL606489.1	AC110079.1	AC114763.1	AC110995.1	DTX1	AL354824.1
	FAM217B	AL360089.1	SIN3B	TEX44	MIER3	TMEM179B	USP20	RHOT1	BOD1L1	PSMA1	RNU6-282P	AC007216.4	AC116903.2	MPP1	PCNP	UTP18	AP000873.4	AL022238.3	MIR30C2	LINC01150
	KIAA1191	NBL1	BX284668.5	AC068888.1	ITGAE	AC025048.1	AGO3	BAK1	TPRA1	MAP4K3	AC009318.2	ZNF670	BRD3	CRAMP1	EXOC3L1	BOLA2P2	ANKRD26P4	ACTC1	UBE4A	AC055855.1
	SUMO2P13	ZNF148	GTF3C3	TWF2	RABGGTA	ZMYND8	ARHGAP30	LINC00472	ARPC5L	AL683813.1	CCDC88C	MRPL49	LRG1	MYH7B	ZBTB11	COBLL1	ITM2B	VSIG10	MYL9	HOTAIR
	LRRC8C-DT	GPAT4	CD27-AS1	PPM1E	SELENBP1	AMD1P3	RPL7A	MIR3657	ULBP2	ZNF790	BRAFP1	AC007792.1	THAP9	CTSB	TNFRSF1A	REEP2	SNORD104	AC046185.3	CD180	ZSCAN21
	DKK1	VIPR2	JUNB	PPP2R2D	ANXA11	AL162426.1	AL669831.1	AC093484.2	RPLP2	LINC00843	CCDC85A	MRPS27	MIR7156	AC097534.1	PRDM15	CCNT2	CARD9	AF186192.1	DNAJC12	TCP11L2
	AC005785.2	ILF3-DT	AL138767.3	TMA7	CEP120	TXNRD1	AC005253.1	GDI2	OSBPL11	ZDHHC21	BDH2	BSN	SPDYE1	NOP9	AL157871.5	NEU3	WDR49	FBLN2	ARMC3	ANAPC1
	TCEAL9	MMD	LINC01944	HOXB6	RAP1A	IRF7	DDTP1	EIF3J-DT	RPL35P2	RTL8C	MYO1B	AC015908.3	AC026471.2	U2SURP	FPR2	YKT6	ZNF91	TBXA2R	TCEAL3	COMT
	BCL2A1	ERLIN1	AC116366.1	CXCL1	TCAIM	TENT5B	CARD8-AS1	ST3GAL1	COASY	AC008443.6	PAX6	GIMAP4	POMK	FAM124A	AC018766.1	ZNF507	AC011451.2	EZH2	BOLA2B	ZDHHC7
	HSPA2	MAP2K7	DDIT4L	MKRN1	LSM10	RNU6-510P	HSP90B1	IL18	ZNF227	AJ009632.2	HDAC5	DTL	ZNF532	NDUFAF4P3	MIR590	PTP4A1	COX11	EXOC6B	ENDOD1	PRPF40B
	AP001469.2	VAX2	CEBPB	FAM32A	COPS9	AL133373.2	TTC28-AS1	STX5	AC009987.1	UTRN	POR	SPIN4-AS1	BSN-DT	SETD5	EHBP1	AL031775.1	PLK3	MIR29B2CHG	AC092117.1	TSPAN6
	NXNL2	CCL13	EIF4A1P10	ANO1	AL009174.1	VTI1B	44260	HGH1	EIF4EBP1	MANF	SAMSN1	AC084880.3	ARMC6	WDR81	AC024560.2	AP000974.1	HLA-B	LRRC14	NWD1	AC025165.1
	AC135507.1	AC116456.1	ALG2	SNAPC3	PRDM10	SRP14-AS1	MFSD12	LCMT2	RANGAP1	SNAPIN	POGK	PHYHD1	FLYWCH2	MXD4	SLC35B2	RN7SL784P	PLOD3	MBD3	GNA14	C3orf67
	DYNC1I2P1	PTPN2	AC008554.1	HTRA1	ZNRF2P2	HMGN2P40	AC015987.1	DENND1C	AC004691.2	FAM118A	ANKRD10-IT1	ARAP1-AS2	AC022150.3	PSTPIP1	LIPA	ALCAM	SLC37A2	PRTFDC1	MAGED1	SETP20
	WWC2-AS2	RNA5SP462	SPATA25	AC013356.2	SIX2	OXLD1	CD9	GCNT4	PKD1P5	NFIX	TCF20	PHC1P1	ZNF491	PRMT1	LINC02381	PIK3R6	FMR1-IT1	RNU6-610P	CLASP2	SDF2
	SGPL1	NEDD1	ACTN1	ELAC1	CDKN2AIP	ARID4B	OLFM5P	PIK3CD	RNU4-8P	RNU6-1291P	UBE2J1	PTMAP11	AL162311.3	AL139022.1	TMBIM4	ATXN7	CIB1	C9orf135	IPO9	NDFIP2
	VPS4B	CUEDC2	CLIC4	PTGER3	XPC	BUD31	AL358216.1	ARHGAP27	PXMP4	AL445483.1	NUDT18	CSDC2	AC027237.2	AC015909.2	CLCC1	CELF2-AS1	POMP	DGKD	PRELP	AL031705.1
	NTMT1	AC007743.1	SLC35F6	LINC00689	RNA5SP298	BAG2	KCNJ5	PLVAP	ZNF839	IL10	TMEM231P1	ZRANB3	AC007182.2	ACTA1	AC003002.2	AC008269.1	RNF126P1	DNASE1	LHFPL1	VN1R107P
	PRUNE1	GADD45G	FLG	C21orf58	C19orf44	CARNS1	RF00139	SLC35A3	AC073869.1	DUSP6	ANGEL2	SERF2	ZNF514	ZDHHC1	DIRAS1	RPL37	AC002400.1	AL121832.3	DMC1	KAT6B
	AC245060.2	CTSZ	HEPH	BIN2	DPP4	FBP1	RPL36	AC104634.1	WDR86	AC124312.4	S100A10	DVL1	FHOD3	ZNF627	AC005154.4	ZNF197-AS1	THRB-AS1	B3GNT7	AP003084.1	AC004890.1
	AL662844.3	AC106037.2	ZMYND19	B3GALT5-AS1	ERCC6L2	ANKRD34A	MCRIP1	RHOQP3	RACK1	AC067852.3	AL354824.2	POGZ	UVSSA	LINC00272	AC009690.1	AC011825.2	PPP4R4	C20orf144	KRT8P26	LINC01126
	PEX11A	CU633906.2	PJVK	TSPAN31	HUWE1	ENPP7P10	EMB	NBPF1	EMP3	CNKSR2	LINC01811	GTF3C6	BRAF	CPED1	RF00092	AC026877.1	AC116917.1	AKR1C1	ZNF274	AC015818.2
	SKAP2	AC105339.2	EVI2B	RN7SKP74	VPS37B	AC098851.1	C3	SMG1P1	NOB1	REX1BD	AC084337.1	GABPB2	FAM178B	AC125494.1	CASP10	TDRD7	AL080243.1	MARVELD1	AC127540.1	DDX11L2
	LINC02076	ZNF266	ATP5MD	RN7SL73P	WDR17	AC087457.1	ADAMTS7	AC092794.1	CCL23	KLF15	CNEP1R1	TMEM115	CLIP1	FTCDNL1	COX10-AS1	JMJD7	NDST1	AL359962.1	SMARCC2	MFN1
	AL034397.3	PAXIP1	RF00015	RFX7	PURA	AP001000.1	RPS24P8	SLC31A1	AC009054.2	SAT1	AL357052.1	PLXDC2	SDAD1	RPS15	CCDC28B	RTEL1	CMTM8	SH3GL1P1	LYPLAL1	TXNL4A
	SLC25A23	AF131215.5	ARPIN	TADA2A	AC018638.2	CLPX	AL365338.1	AL021368.2	AC090260.1	PUS1	AP000692.1	LAMP1	UGDH	AC114501.1	LHX2	COMMD3	ZRANB2-AS1	ZNF19	UBAP2	BECN1
	NUDT1	PRRC2B	TOMM70	SENCR	LRRC2	AC104771.1	AC132812.1	IL1RN	KPNA6	RRP12	ZDHHC15	AC011290.2	WNT5B	LHPP	DDX18	RN7SL526P	NCF2	RPL36AP43	PRR32	BTK
	RPL13AP5	AIDA	TLE2	PARP16	AC006480.2	PNKD	EIF3I	AC006483.2	CCDC191	AC015819.1	ID3	RF00586	SFMBT1	HAS1	AKT3	AC018665.1	PHF8	RPL34	LILRA2	SIGLEC14
	NDUFS1	AC002429.2	HLA-DPB1	KLHL35	LRRC63	PRKACB	HACD1	AC092164.1	AL138831.3	AC025171.2	MPZL1	AC026355.3	WDR5B	AC138956.1	FAM98B	AC115223.1	AC093484.1	BX293535.1	AL132657.1	AP5S1
	AL359314.1	ALKBH3-AS1	AL080243.2	ANAPC13	COPS7A	DHX36	CCDC197	AP001001.1	SLC41A1	FBXO43	NIPSNAP3B	GPR34	CC2D2B	MED1	CTSL	ATXN3	SLC25A46	USP28	CCDC14	AP4E1
	MIR4696	VPS50	RAD21-AS1	SLC36A4	CEND1	AL137003.1	EIF4A2	TNFRSF12A	STAG3L5P	AC022107.1	AC124248.1	DERA	VOPP1	ABCG1	AC096745.1	H2AFX	LINC00928	SLC12A8	RPS8	DLX6
	IFI27	CHD8	RNU6-1263P	RDX	AC107926.1	AC008764.9	PAXBP1-AS1	AEN	AC002553.1	GRAMD4	LINC01273	SSTR1	ZNF286B	ZNF12	KRT18P7	RFTN2	MIR133A1HG	A2M-AS1	MIR421	ZNF285
	MAST4-AS1	RPL13AP20	NEK4	TTC37	PRICKLE1	CLEC11A	OST4	AL360268.1	PYGB	SEMA3B-AS1	RPS28	AC234782.1	AC062037.2	HEMK1	GGTA1P	PHPT1	SLC25A33	THAP10	AC021231.3	AL713922.2
	NCF1C	AL158163.1	DGKI	AC098679.4	MPEG1	CCT2	AC090695.1	KIF24	CPNE2	ZNF37A	FKBP9	AC012555.2	ANXA9	PREPL	LAMC1-AS1	DCDC2B	AC008760.1	AC245595.1	TEP1	ANKRD12
	ZNF155	POSTN	AC073569.3	COMMD1	GGCT	MIR9-3HG	TMEM234	MRPL48	AL031429.2	INSR	SCHIP1	KDM6A	CSF2RB	HSPA12B	SRA1	KMT2B	LIF	TRADD	IGHMBP2	RBBP5
	HMGB1P1	DGUOK	ARHGAP11A	GNAI2	LINC01347	KRTAP5-1	RNASEK	SGSH	CFDP1	MGAT1	AC127024.3	VLDLR	OSER1	EXOSC6	C22orf34	PRDX1	TMEM62	AP003419.2	ZNF780B	RPA4
	LINC02454	IMMP2L	AC092910.3	PTCHD3P2	CIAO2B	SNX24	WHAMMP2	ZNF546	UBAC2	SPSB3	AL035409.1	AC020907.5	AL354718.1	AC004921.1	AC079203.1	TACO1	MRPS30-DT	RNASE4	PLBD2	HMOX2
	ZNF696	LINC01123	FTLP12	RPS3AP34	TMEM74	SLC30A7	BABAM2	AP001767.3	AC103858.1	MEIS1	AC245128.3	RN7SL665P	TBX18-AS1	LINC01638	NUP210	RPL18A	AC092803.2	AL162731.1	RPS6KA1	RNU6-584P
	AC099687.1	FAM84A	MTFMT	GNAL	IRF8	PAQR7	AC087289.2	CYP2S1	L29074.1	AL845472.2	IL32	ATP5ME	NMD3P1	AC012618.2	UBR7	EXOC6	CR1	AC133550.2	USP1	AL512791.1
	ZNF383	BTBD7	ST7-OT4	PLIN3	TSSK6	KAT6A	CACNA2D4	LINC00920	RPL38	AL163636.1	ECHDC1	AC090186.1	TRRAP	DSTYK	AC098484.1	SP3	CCL20	AP001793.1	YOD1	ARVCF
	EBP	AC232271.1	TP53RK	NLRP9	TENT4B	AC012360.2	BHLHA15	PDLIM2	C3orf18	CENPJ	MIR22HG	AC104825.1	C19orf24	RAB11FIP3	FURIN	AHDC1	AC000089.1	AC007848.2	GM2A	RNU6-1016P
	OXR1	USP21	FDX1	REV3L	WDR13	RANBP2	PRKX	ZBTB38	TMC8	XXYLT1	DSC2	GPATCH3	WDR1	GAK	PCAT19	SERTAD1	THUMPD1	ELOVL3	FAM43B	MANSC1
	BAHD1	AL078581.3	CCDC8	AL135936.1	CTPS2	AP000866.3	DUXAP8	DIAPH3	LINC01106	SPATA2L	CICP20	CHM	CFI	PDZRN4	TNFRSF11A	LAMTOR2	AC108449.2	MEN1	PCDHGC4	AC002070.1
	ARHGEF10L	CLOCK	OAZ1	SPP1	PRSS42	AOAH	JAK3	GABBR2	AL133342.1	ZNF426	AC083843.2	KLF7	SDR39U1	ZNF425	ST3GAL4	AC083964.1	KPNA1	AKAP11	AC092611.1	CD28
	AC000078.1	AC017002.3	METTL22	C5orf66	RN7SKP80	LINC00653	AC003002.3	CHIAP3	TASOR	NUP93	AC136475.1	MTCO1P11	B4GALT3	LINC00630	AC096642.1	SLC11A1	AKAP8	AL096712.1	AL161756.2	Z97832.2
	SNRNP200	AC099681.2	C16orf74	FBXL20	MSL3	CTNND1	RPL39P3	BICC1	PTBP3	LOH12CR2	EDEM2	ZNF850	ZNF611	DHRS3	SNORA59B	SOAT1	ATP6V0E2	IER3IP1	ACTG1P10	FAM66E
	BAMBI	NAGLU	NR1I3	AC100778.2	MIR139	CTBP1	LIMA1	RAB3GAP1	RAB2B	LEFTY2	DDX28	ICAM2	Z99289.1	ELOVL6	ALDH3A1	PSAT1	LINC02310	AC079089.1	C9orf16	COL1A2
	LINC01710	HSPB6	TOMM34	DNAJC25	ZNF169	AC231657.1	TNFRSF10D	S1PR2	PPP1R37	PDE8B	BCL2L2	WFIKKN2	RPS3	TESC	S100PBP	RNA5SP111	RNU4ATAC18P	GBA2	KHNYN	METTL7B
	GPR132	ZNF25	URM1	CBWD2	LTC4S	LRRC37A9P	NCF1	AL589745.1	HCG15	PIK3CA	PRDM16	ASCL2	LRPPRC	VLDLR-AS1	FBXO10	AL591721.1	AC024267.5	ZNF674	SNORD62B	AC012615.6
	STAT2	ACTG1P24	LINC01569	OTUD6B-AS1	TUBGCP2	HAUS5	CCDC185	SFI1	AC092279.2	ZNF99	EPN2-AS1	RAI1	MRPL43	THEGL	MBOAT1	ACER2	RNA5SP203	CD93	ACOT11	IFT27
	CCDC96	TTI1	TST	SLC17A5	PGM3	MIS18A-AS1	AL731566.1	TYMP	KHDC1	AC008267.2	AC021752.1	AC024933.1	NDUFA5P4	SLTM	RPS4X	CBFB	SOS2	POTEI	AC087164.1	FGR
	ARHGEF1	EMP2	DET1	AP000240.1	SHLD1	AC090616.6	AC009126.1	EML4	LINC01480	TREM1	FBN1	KCTD14	AC078909.2	UIMC1	KIF5C	TSEN2	NBDY	FKBP2	AC004771.3	NIPBL
	CCL4	FANCL	BMS1P19	KLHL21	ZSCAN31	ARPC4	NAT8B	MED12	AC234782.3	PDE9A	CLEC4GP1	GSK3B	SLC22A3	ERGIC1	CCDC87	AC091182.1	ZKSCAN3	C9orf72	CUL4B	RPL36A
	NAA38	AC141002.1	ARSA	SLC25A21-AS1	SLC16A6P1	FLVCR2	ZNF525	AC080162.1	CIB4	DUSP3	ZNF581	AP003071.3	AC093367.1	BX323046.1	LRCH3	P2RX4	AC245884.4	SCOC-AS1	ZFP57	VSIG8
	EIF4EBP2P2	RGS16	IGF1R	ZNF81	AL355916.2	AC019069.1	RCC1	AC241952.1	ELP5	UTS2B	C1orf159	SLC27A4	AC016586.1	AC145207.5	AC107956.1	PYGO2	NFAT5	IGSF6	AC096720.1	PDIA3P1
	SELENOH	RPS10	AASS	CCDC120	GNG8	CHMP2A	SBF2-AS1	AC069542.2	GSC	RNU6-171P	RPP14	ZNF736	AC246787.1	SAR1B	CDCA4P1	44262	MIR3186	RPS3A	AC015818.6	CCSER2
	AC022182.2	USB1	RSPH3	RASAL3	AL021997.2	TMEM106A	AP000873.2	U62317.2	WWC1	AL121830.1	PPAN-P2RY11	AC006557.5	AC015959.1	SEPT7-AS1	MIR3153	MRPS7	SPARCL1	AC020915.2	TIMM23	Z97985.1
	HLA-DRB5	ZFHX3	TNFSF13B	AL358933.1	AC093390.1	DCAKD	STAU2	AL445187.1	FARS2	TTC39B	MFSD13B	LINC01504	HOXB7	VWC2L	AP000317.2	HTR1B	GRINA	FRAT2	SYBU	TMEM203
	FAM129B	AHNAK2	SLC22A18AS	MIR6081	MTX3	AC019205.1	IER2	ZNF24	MYD88	SNRPD2	KCTD3	ALDH1L1	ALG9	MRPS17	MIR5581	AC007066.2	JOSD2	MIR503HG	STRA6LP	GLRX5
	NOMO3	AC103739.1	UBE2M	AC055811.1	AC011330.1	AL162431.3	UBE2Q1-AS1	AL050341.2	AL391001.1	SEPSECS	ZNF879	TTC38	IQGAP3	ZNF561-AS1	ZKSCAN7-AS1	KIF14	CNOT4	CNR1	TRIM27	SEC24B
	TIAL1	BIRC6	AC120049.1	NCKIPSD	PHYHIPL	AC046143.2	OPA1	TMSB15B-AS1	ERVFRD-3	MAGIX	AC067942.2	ZNF655	RC3H1	PPP2R2B	AC087393.1	NXT1	CCDC117	AC006030.1	IFI30	RN7SL535P
	RN7SL605P	PNISR	TMEM216	RN7SL481P	ATRAID	ZNF137P	GLT8D2	OR52V1P	TMEM273	AL354733.2	LDOC1	NLGN1	GPALPP1	HELZ	CERNA1	ATE1	TMEM108	AC022558.1	ERC1	GPS1
	NDUFA4L2	SARAF	LINC00997	NEK10	ITGA9-AS1	MAPK3	EIF6	AL157823.2	PDIA3	GPR62	AL133481.1	HLA-DRA	KLF11	MFSD11	AP001107.3	RAP2B	HEXB	Z98048.1	RF00017	MMP15
	C11orf42	CSPG5	SASS6	MPV17L	AC093151.3	RPL23	DEAF1	AMMECR1LP1	RERE	INCA1	GDAP1	THRA	RNF7	RN7SKP75	AL355075.2	MAP3K2	ATP2B1	AC012511.1	TNFRSF8	TTC21B
	PSMC5	MROH7	AC008736.2	HMGN1	AC016027.2	CATSPER1	AQP3	ESR1	MVP	AC099560.1	NACAD	SH2B3	SLC25A15P5	LINC02104	SEPT3	LINC01359	TRMT11	IL1RL2	PROSER2	S100A16
	CST3	AL049697.1	SNAI3	UBXN7	TUBGCP5	ZNF143	UBE2L4	ZBTB6	SLC23A1	ZNF33BP1	EIF3D	RBMX2P2	AL118556.1	SPATC1	EBI3	AC004076.1	GLB1	AMPD3	AC046143.1	SEMA6A-AS1
	CDAN1	AL627309.6	LRRC15	SHKBP1	LAMA2	U52111.1	ARHGEF19	AC007098.1	RPL6P27	HMGB1P41	SETDB1	GALE	AF121897.1	SACS	ZNF347	SNORA47	SNORA16B	TOPORS	GTF3A	FANK1
	ZFYVE21	RF02116	RPL7AP15	PRLR	RNMT	FGD5-AS1	AL162725.2	WRAP53	ARHGAP31-AS1	PHBP9	SRRM1	ACADVL	C8orf76	TOX4	AC041040.1	MACROD2	HMGB2	PCIF1	PPP2R2C	DNAJC13
	SGCB	AL008719.1	MAN1A2	HK2	SRFBP1	GJA4	AC024575.1	TOP3A	AL357075.2	PLEKHJ1	AC018410.2	VKORC1	SLAIN2	SNORD116-8	PHB	ANLN	NAIF1	NUDT12	AC020594.1	ADGRL1
	AGBL5-IT1	AL445435.1	LINC01160	AC134772.1	MIR548N	NUP214	TP53INP1	ASB13	EBF4	TIAM1	CLEC7A	AL138724.1	TMEM68	SLC2A9	NUBPL	RAD51D	BNIP3P42	AC010504.1	RNA5SP467	NFIA-AS1
	CCDC170	ACTG1P3	LDLRAD2	CCL8	MAML3	CHST13	ID4	BRWD1	CNOT6L	CYP27B1	AL353748.2	ZBTB45P1	RNU6ATAC38P	UCKL1-AS1	DSE	CCL4L2	AC021945.1	CA3	INHBA-AS1	TAF10
	AC113208.2	SLAMF8	CEACAM4	AC004975.1	PKMP3	FETUB	LY6G5C	LXN	PLEKHO2	CLN3	RFC1	GOLGB1	OGFOD1	RPS26	AL353705.4	TNFRSF10C	ALDH1L2	GPATCH8	TTC7B	SNAI1
	REP15	RNU2-28P	EP400	NCAPG2	ZNF257	MAD2L2	ATF6	LINC02035	SNORA15B-2	SWI5	SSR1	UQCR10	CACNA1C-IT2	HSPA7	WEE2	MCF2L	AC090912.1	ESYT1	RPL12P9	FYN
	RIOK3	TTLL7-IT1	AC113191.1	ZMYND15	AC004461.2	ACRBP	UCP2	PARP2	RAB33B	SPIN1	TMEM141	AJM1	LINC00886	AC090948.2	RPL27	ASPSCR1	FTSJ1	DISC1	ARID3A	NUCB1
	SLC38A10	CC2D1A	SUGT1P4-STRA6LP	LINC02280	MAP2K3	ARID1B	AC114495.2	FAM199X	WWC2	UQCC3	ZNF808	ATXN2	AL592435.1	AC139795.2	ACTBP2	C12orf10	AC141557.2	ACP5	AC073130.3	MUL1
	COA4	AC007842.1	AD000864.2	UBAP1L	AKAP2	AC018638.1	AKR7A2	RPL41	RNU6-1048P	RGS10	NDUFB2	GPR79	ALG8	AP000436.1	NDUFA3	POLR3GP1	SH3BP2	PES1	ZNF160	AGAP3
	RHOBTB3	AC022364.1	NUP155	PGM5P2	TM9SF3	NGRN	AL161640.1	FAM177B	AC131159.1	CELF6	TMEM147	IRF5	RNF123	ALDH6A1	CPNE3	MIR1302-8	AC008966.1	KRBA1	CDC42P4	ZNF75A
	RPL35A	AL049780.2	AL645939.2	TUBB3	IMPDH1P6	IFITM2	GPX4	SLC25A36P1	AL158212.3	SLC16A3	MCTS1	PGM5P4	S100Z	TOX2	FBXO3	AL021578.1	SPON1	AC016747.3	AC069281.2	AC104564.2
	RPS2P7	ZFAND1	ICMT	TPD52	COQ4	GPC6-AS1	AC104758.3	IGFBP6	TMEM253	GNG12	PRAG1	AC027559.1	AC046158.1	FUT4	SLC36A1	SLC6A17	RPS2P5	CCNQ	SLC9A7	PITHD1
	AC016722.2	ITGB5	LINC01775	AC093801.1	PLCG2	RNF180	ACADM	ZNF90	RN7SL303P	TATDN2	EGLN3	HMGN3-AS1	AC234775.3	GOLGA8Q	AC226101.1	CENPBD1P1	CERNA3	AC009927.1	AC138150.2	AC020911.1
	SFTA1P	AK4P1	RNF214	AC016866.1	AC064807.1	NOC2L	PTGES2	RNU6-550P	AC244154.1	NAGA	LINC01271	AF201337.1	AC009093.4	QARS	DDIT4	RN7SKP17	MDC1	VEPH1	MST1P2	AC006159.1
	PDGFRL	CD59	AC073316.3	MPP3	SERINC2	SUSD4	ATP1B3-AS1	PDGFRB	AC010280.3	GPR157	TOPBP1	ZNF48	LINC01198	HMGB3	MBD1	AL731577.2	ACKR3	ADNP2	CMKLR1	PSMD14
	AL109614.1	AC010336.5	AC006557.1	SDE2	CCDC15	AC110769.2	AC006960.1	NTN4	ABCC6P2	TRAPPC1	SLC38A11	LSP1P4	AL445231.1	COL16A1	SIGLEC11	SBNO1	AC069185.1	AC004233.4	F2RL3	FLVCR1
	HLA-DRB6	CUL5	AC092681.3	AP001266.2	PLEKHG2	DNAJB14	AC099681.3	RNH1	AP000915.1	AC118344.2	RSBN1	QSOX1	ZNF420	RMDN1	HNRNPCP7	MIER2	PPM1B	AC139887.4	CAPNS1	CRIP3
	AC138207.4	PTOV1	CCDC66	AP000766.1	PRPF3	AC022916.1	SCO1	AC010306.1	MCM2	CRYAB	AC023906.4	B9D2	TPI1	GGT7	ATF2	LRRIQ3	AC007403.1	DNAJC1	SLC18B1	AC020763.4
	MIR4502	OR7E128P	ZNF566	GLUD1	AC090515.4	LINC02051	TRIM37	VDAC1	AC053503.1	MIR5695	AC087301.1	PRELID1	PLA2G2A	SYS1-DBNDD2	RPL22P1	SCD	ASS1P2	ZFYVE27	SECISBP2L	GUK1
	AC007292.3	RBBP4	AC099811.6	MARCKSL1	C11orf98	ZNF841	AC244090.1	SERINC5	Z97634.1	TUBB2A	ADH5P4	ELFN1	CCL26	DCAF16	AC098614.3	C3orf49	SNX20	C1orf53	AP001528.1	ABHD14A
	TMEM44	AP5Z1	EFHC2	MDFI	MED19	ST6GALNAC6	LYSMD1	SNORD63B	AL591926.2	AC005225.4	NEK1	A2M	CHAF1B	LDLR	ARL13B	LINC00471	LSM12P1	LINC01079	AC092802.2	RTEL1-TNFRSF6B
	OCLM	NMBR	AC005730.1	EVA1A	SAP30L-AS1	LINC01799	CDK18	TAB3	AEBP2	AC008840.1	ATG4C	MIR3945HG	AC073610.3	STX10	PCAT6	FAM102B	ATP2A2	WDR64	AC131971.1	ZMYND11
	ARL2	AC022819.1	HSPE1P26	OLFML2B	MS4A14	CCDC137	ACTN4	AC004678.2	AL158847.1	ACER3	SLC17A3	AC008443.1	PDK2	EPHA4	LIX1L	AC019197.1	GFOD1-AS1	AC114980.1	AC004492.1	SPINT4
	PCBP2	AC010809.1	PCNX2	AC025627.2	AL356124.2	TRIM73	VANGL1	TAF4	GFM1	CCNYL1	CREB1	CTC1	FAM83G	AL691432.1	RN7SKP150	TTLL5	DDAH2	TRIR	SLX4	KIAA2026
	PARL	P4HA2	ARAP1	AC004696.1	GZF1	MYBBP1A	ZNF835	ZMYM5	ADAM1B	SUDS3P1	RSF1	AC106782.5	CCSAP	GABPB1-AS1	UBA52	FZD6	LYL1	ASB8	KIZ	NDUFA1
	BCL10	NXPE1	PAXIP1-AS2	AC244021.1	AC138356.3	SLC22A5	AC053503.6	BCKDHB	ZNF763	WNT11	AL355388.2	ZFAT	AC011447.3	AL133264.2	AC090198.1	CDCA7	AC105129.3	FRMD4B	AC115284.2	AC123595.1
	TMEM236	CEP83-DT	YTHDC1	AC092818.1	RNY1P9	CDC42BPA	ARF3	SAMM50	EIF1B-AS1	CCDC110	TMEM25	H19	SOWAHD	ZBTB41	TCAF1P1	AC010326.1	ACACA	AC073111.1	GNAQ	CAP1P2
	YTHDF2	ZNF417	SPEF2	IDH3G	RPL23AP66	GYG1	AC127537.1	BAHCC1	AL355338.1	AC022217.3	TSBP1-AS1	AL391987.4	INE1	AC114956.3	RN7SL145P	PEAK3	AC016582.3	SH3BP5-AS1	HOXC13	AC083843.4
	AC124067.2	RBFOX3	AC104447.1	AC092999.1	ZNRD1	SAPCD1-AS1	ACSL1	HIRIP3	SEPT6	AC082651.4	ARGFXP2	AC145285.3	ZNF564	H3F3B	XKR8	PDK3	BMF	SPAG9	ZSCAN25	SACS-AS1
	DNAJC18	DOCK9-DT	AL139407.1	BCAT1	LINC01567	LTB4R2	KDM7A-DT	CISTR	FBXO11	AC133552.3	RFX8	VPS26A	MRPS15	GPX1P2	AC074131.1	ZC3H14	GSTZ1	SMURF2P1	CDO1	ATRX
	AL356215.1	SEPSECS-AS1	PSMA4	HSP90AA5P	AC104212.1	AP001542.3	AL390195.2	KLHDC1	MDM2	RNU6-611P	SNORD124	SYPL1	CACNA1A	RPL7P17	HOOK2	PSMC3	AC027237.3	C11orf24	KBTBD11	MED21
	ORAI3	ANXA13	AC008080.3	FPR3	AC084036.1	AGPAT2	AC015813.5	AC131025.1	BAALC-AS1	RNU6-1086P	MORN4	IQGAP1	RNF32	SNAI3-AS1	ABCA12	AC021088.1	LMBR1	MED13L	CD84	ATM
	HLA-F-AS1	LAMTOR5	KYNU	SLC5A6	SH3GL1P2	AL096865.1	TNFRSF18	AL583810.3	AC022395.1	MYO3A	AIM2	PSMA7	HLX-AS1	EPHA2	JAML	TLE6	WDPCP	NMB	MSRB1	HMHB1
	RPS27A	PAIP1P1	TJP1	WNT10B	PBDC1	PPP1R2	METTL3	LURAP1	ACVR2B	PRKAR2A	OTUB1	MIR5590	SNRPCP9	NCOA6	LRRC8B	RBPMS-AS1	CD40	DNM1	TPMT	GPR3
	AC005828.5	BLOC1S3	CENPC	AC087286.2	PRR29	ABT1	TCEA1P4	JAGN1	EXOC5	ALYREF	RPL9	AC124283.4	UNC5D	AC107072.1	AL021707.4	AC141586.4	PRPSAP2	AC002091.1	AC002454.1	44264
	CEBPE	RNU6-30P	CCDC151	SLC12A9	CCL3L1	HMGN4	ZNF192P1	MFSD6	TMEM14A	AC005034.5	TRABD	LSM7	C6orf132	PPIAP53	NDUFC2	MICU3	AL512625.2	CD200R1	MYL6B	BTG3-AS1
	AC073842.2	AC024293.1	GMPS	TIAF1	A1BG-AS1	AC140134.1	HSPA8P4	YTHDF3	AC084018.2	AC006449.2	AC009779.3	AC083798.2	CEP192	STK33	STEAP1	AC010325.2	SLIT2	ADGRG4	AC069499.1	SEPT7P9
	DPP7	ETFB	MAT2A	IL4I1	OSBPL3	KRT18P59	AC016738.1	AC008897.1	MTA2	RNA5SP317	AC005224.1	AL121753.2	AC016769.3	AC119396.1	VARS	ABHD16A	ACSBG2	ZSCAN12	FLNB	IST1
	AC078795.1	RENBP	ST8SIA4	AC008649.2	HNRNPA1	AL162431.4	CRYZP1	AC111170.1	LINC01998	AC106865.1	TMED10	PMS1	SNX5	NFATC2	LUC7L3	AC090510.2	AC087276.2	AL049838.1	AC134775.1	PITPNC1
	DUSP2	RN7SL81P	SERHL2	NXPE2	SLC35B3	AC016957.2	AP001453.1	SLC25A10	FAM30C	CD81-AS1	CPEB2	SHMT1	TMEM41B	ANKRD20A21P	AP003071.4	LUC7L2	AC073367.1	AC087501.4	AC010522.1	AC104241.1
	AC080023.1	AL160394.1	MIR600HG	GPR65	AP003072.2	AC024267.4	NDUFA3P4	ZNF29P	SAP130	FBXW2	RNU6-1157P	USP31	DDX11-AS1	PRKG1	AC146944.2	BBS7	AC011899.3	HMCN1	ANKRD29	JAK2
	AC034234.1	ZNF517	MAP4K4	AC008763.2	OGA	PTGES3P1	ZNF594	DNAJC8	HDLBP	AC127496.4	ID1	ATP1B1	MYO1G	USP27X	PIEZO1	AL079342.3	ASPHD2	AC092944.1	GMEB2	AP001462.1
	FAM205BP	STON1-GTF2A1L	ARL10	AC092490.2	METTL9	PODN	PIK3R1	PTK2	KMT2D	MAP7D3	ARHGEF12	GNG4	DDX12P	AC092111.1	MED28P3	AC116533.1	C1R	GCKR	KIZ-AS1	ZFHX2
	LINC02328	SNHG17	ADAM8	AC016582.1	MMGT1	HYLS1	TUBG2	DAB2IP	AC005618.1	TULP2	JPH1	RNU6-767P	BZW2	AP001574.1	RNA5SP92	Z83844.1	LINC01357	KIF13A	AC037487.4	ARHGAP6
	FIGNL1	DIS3L	ANP32B	TENM3-AS1	AC107983.1	TIMM8AP1	SNX19P2	ASCC2	AC127496.2	CDKN2C	C1orf21	AL354718.3	HSPBP1	DDX58	SRSF2	TCEAL8	AC025165.3	LINC00519	AL606760.3	PRPF19
	PTPN22	RPL21P28	AC015849.4	AC009237.14	AC009336.2	AC130352.1	SLC2A13	RRM1	AC104461.1	RPL3	CNIH3	DENND5A	AMT	AC104619.1	AC055876.2	PCGF1	PPARG	AC005514.1	TENM1	SNORA55
	AC022215.1	ABCA3	RFNG	MAMLD1	ASH2LP3	MIR887	C2orf49	AC008734.1	RPL37P6	NVL	PIAS2	ZNF626	AL133406.1	AC092040.1	ZIM2-AS1	ARFGEF2	Z82206.1	RPP30	AP001471.1	STX18
	CST7	ZNF628	RN7SKP239	TCN2	HDAC10	AC139149.1	AC066613.1	KHDRBS3	AL627230.1	AC110760.2	GNGT2	LTBP2	COL4A2	TAS2R3	KCNJ3	SNX11	DSN1	AC010480.1	RALGAPB	SMC3
	NAB1	RF00411	AP000911.1	SNED1	RNU7-186P	AL139142.1	RB1	AC025165.5	AC096720.2	AC005920.3	CCR10	DOCK8	CKB	RPL13AP7	AL607028.1	AC007204.1	AC009977.1	MIR573	SLC25A29	LINC00899
	ADRB2	RPL21	SCAF8	RNY1P13	RPS15AP38	ZNF571	HNRNPA1P14	AC007557.1	PAUPAR	IGF1	EPX	MRVI1-AS1	PARP6	MYCBPAP	AC011497.2	TSPYL4	ST6GALNAC5	LINC01744	GRM2	MED27
	AC092943.1	WIPF2	AC022154.1	ZNF317	NME1-NME2	AC017015.2	SLC2A5	PTPN3	ZNF43	ECT2	DPYSL5	ACVR1B	AC022150.2	BAZ2B	AC007114.1	LINC02102	TRDN	CELF3	ARPC4-TTLL3	AL138690.1
	ZNF470	AL391335.1	AL590867.2	TK1	NFE2L3	AL162171.2	AC022210.1	LCORL	PIKFYVE	AC090124.1	AFF3	AC009996.1	KLHDC3	TBC1D8	GRWD1	LAMB1	KLF12	CDK2	COX6CP15	KLF4
	RPL7AP10	ZNF862	AC009163.6	HDAC7	SCRN1	REEP3	BCL3	AC105271.1	SEL1L3	RRP36	KRT8P15	FAM126B	AC112484.1	RPS14	CSNK1A1	FAM95B1	AP005329.2	RNU6-875P	AC073257.2	ZER1
	TMEM171	ADGRL4	RBBP4P1	MEIS3P2	AC016769.1	HOXC12	AC104076.1	RILPL2	SSXP10	AC097376.2	SLC2A11	AL645504.1	SCN3A	SLC31A2	CERS6	PRPF31	MIR3617	AC068896.1	SCYL3	SLC15A3
	ZC3H7A	AC024580.1	ZNF213	STOX1	KLF7-IT1	NCF1B	AC007998.3	NTF3	PREP	NDUFA2	ESCO1	ACAD8	HIGD1AP18	SPAG8	MTCYBP43	AC009220.2	AC096543.2	RITA1	AC107072.2	CDK5RAP2
	AC026894.1	PRELID1P4	BEND3P3	PYCR3	C1orf220	AC060766.4	STON2	CUL1	44261	TMEM163	AP000560.1	OSGIN1	IL18R1	RNU7-165P	BOLA3	AP000944.1	AC139256.1	CCT7	EAF1-AS1	ZNF557
	CNOT6LP1	GOT2	AC027228.1	ZNF697	AC064799.2	SRP68P3	CSRP2	CCNA1	RNA5SP488	STK26	CERK	AC091544.2	PIGP	RPS16	RIPK2	LINC00941	NDUFB11	LINC02614	LRMDA	AP3S1
	AC079210.1	THBD	DUSP8	ANKRD49	RBM26-AS1	POMGNT2	PCDHGB4	API5	RFC4	ELOB	AC104260.2	AC092338.2	MIR4736	AC092803.1	AP000525.1	G6PD	ANGPTL4	LEF1	COMMD7	TRIM56
	AC010326.4	FRMD4A	TBX15	ALKBH5	TUFM	PGAM1P3	BNIP3P26	IGFBP5	IL15RA	ANKDD1A	RTCA	CSPG4P11	AC008737.1	AC046134.1	RNU6-1206P	STK19	AC104986.2	AC021231.2	HPS6	CD99
	ARMC7	CDC23	AL139384.2	KCNAB2	FKBP1B	ZNF596	CLN8	AL355480.1	CR769776.2	SENP3	MFSD8	ANAPC11	ZNF311	AURKC	GRB2	GXYLT1P3	NXPE4	AP003119.3	HIGD1AP12	NSD3
	AC083843.1	RF02200	RABEPK	AC005776.1	AC105935.1	AC005165.1	LINC00893	GJB2	CALCOCO2	KIAA0408	CCDC93	MIR5587	COMMD5	AC022400.7	OLFM1	ANKRD18EP	LINC01948	IFI27L2	ZC4H2	CCNT1
	GREM2	AC026410.1	MIR1285-1	HM13-IT1	AC008494.3	LOXL1	FOXJ3	LINC01356	AC003956.1	MYNN	RPS29	PSD4	NELFE	EPG5	MAF	SYPL1P2	BMS1P1	BX470209.2	ABHD12	FAM133B
	DIP2A	LRRC58	ARHGEF34P	ST3GAL2	FLOT2	CAMK2A	FDFT1	VPS37A	RPLP1P13	ERH	MOB3A	NADK	SETD6	ARL3	RF01241	TWIST1	CLPTM1	TTBK1	ASB5	TMEM220
	ANXA7	ERBIN	HRAS	UBE2T	RAVER2	AP005019.1	TMEM59	TCF4	AP2A1	TMEM223	C8orf37	Z84492.1	LAPTM4A	AC018645.2	AC093702.1	MAN2B1	DCK	RN7SKP179	FTH1P15	WDR18
	ZNF253	AC145207.8	TMEM233	GIMAP2	AC113382.2	MALAT1	SH2D3C	TIMP2	XG	RF00432	PRRG4	C1QL4	SNORA70F	GOLGA8K	FRMD6	SPRY1	BCAR1	R3HDM4	TPCN2	ZNF462
	GNL3LP1	FKBP15	CLIP4	TMSB4X	ZNF887P	SIGLEC5	DCLK2	NCOA7	AL132989.2	DHX40P1	AL645568.1	PCDH20	FAM90A2P	AP001178.1	AC084819.1	UBE2FP3	DONSON	SPAG16	HECTD1	AP002884.1
	NHLRC2	TEX29	THUMPD3-AS1	CD72	GNS	NKX2-5	STARD5	SDHAP3	CDK20	BRSK2	SIGLEC10	ZBTB17	LRRC53	AL022334.1	AC026412.1	ATG2B	VIRMA	RRP7A	FRAT1	IPMK
	C6orf201	SNHG9	AL590226.1	ANXA1	PAICSP1	KCNE4	C18orf32	TMEM131L	CD300E	IRAK1BP1	AMY2B	BCAP31	COPS2	GBAP1	MGRN1	RPL37A	AC008781.1	BNIP3P27	NBPF22P	LAMA5-AS1
	DENND2D	SH2D2A	NKG7	NACA	NUDT7	HLA-A	TIFA	AL390879.1	LINC02285	ARIH2	EIF2S2	RMI1	ATAD3B	MAPKAPK5-AS1	ZNF669	AC016727.1	FAM201B	KCTD9P1	RNU6ATAC16P	TMSB4XP4
	LMO3	GOLGA8N	FFAR2	EPHB2	AC068587.2	AC018737.2	RNU1-96P	VNN2	GNLY	AC005288.1	HRNR	TENT4A	LRRC37BP1	TNFSF8	KBTBD13	CASP5	MRPS12	SNX13	AC092535.4	RNA5SP82
	ZNF776	AC006994.2	RPS7	AF131215.7	AC073912.1	SF3B1	AC138932.5	MTHFD2P3	GIMAP8	AC008434.1	TCEANC2	ARL13A	AC007952.6	DHRS7	AL355802.1	RHOT1P2	ANKRD62P1-PARP4P3	BCDIN3D-AS1	POLR2H	COA3
	LGALS1	ZNF607	FUT7	AC245100.7	NOC4L	KLHL7-DT	SPRED1	TNFRSF9	ENPP7P12	CMTM6	AC243962.1	SS18L2	AL031709.1	SDAD1P1	CDC123	SRD5A3	AC004943.1	PSMB2	AC130689.1	RNU4-62P
	AL035413.1	TCF25	RPL26	AC084064.1	CTU1	CEP170B	AC004584.1	AC011611.5	CSGALNACT1	FKBP1C	PSMB3	BLCAP	FAM205C	MMP1	DDX50P1	AC004943.2	PLPPR4	AC021483.2	STKLD1	LPIN3
	AL583834.1	AL136380.1	EHD3	MRPS31P4	AC012074.1	PRF1	AC009533.1	RNF8	TSC2	SEC14L1	RPL24	ALG1L11P	AC112503.2	MRE11	C4orf54	PSEN1	RNU6-850P	NKD2	CDA	DPAGT1
	AC024940.4	APOA1-AS	ARL16	PIK3C3	AC090607.1	AC010735.1	AL359198.1	AC010163.2	GADD45GIP1	MCOLN1	CEP63	HIST2H3D	USP16	AC084018.1	SNORD116-26	LAGE3	RNA5SP187	BSG	AC015977.2	HIGD1B
	SUMO2	AC011530.1	SDR42E1	AC002064.2	SNORD116-14	CELF2-DT	RASSF8	CD70	CSPG4	SNRPCP11	HOXC13-AS	CICP9	RTRAF	BHMT2	TSC1	RNU6-945P	PRPF39	DDX19B	AL137003.2	ENO2
	PCNT	GZMB	RALYL	AC096887.1	TNPO2	AL031670.1	OPHN1	CREM	IFRD1	MIR3149	AC078909.1	LINC00466	AP004371.1	THUMPD3	UPF2	AL021878.2	AC027319.1	CCDC12	FUT9	TMEM63A
	RRAGB	ARMC5	UFM1	AC005954.1	LSMEM2	NUDT8	AC009812.2	ATP9B	WFDC10B	AC020910.3	AC093582.1	NAA30	STMP1	ZSCAN18	ADGRG3	LY96	AC004134.1	AC084125.2	STAT4	GTF2I
	POLR1C	RF02219	ATL3	MOB4	H6PD	DNM1P28	L3MBTL4	AL121768.1	RAD17	LINC01634	MMAB	GTF2IP5	C9orf64	AC096921.2	UBE2Q2P1	ZNF283	AC020763.3	DYNC1LI2	AC114982.1	AL021997.1
	MTO1	ELL3	CARD11	AC011899.2	AC106037.1	AC004890.2	MT1X	FBXO38	ARHGAP17	LINC02321	AC113385.3	MAP3K4	TLR9	EXOSC10	ACTG1P23	DNAJC21	KLHL6	ZC3H13	AC011446.1	AL596220.1
	AP001107.4	AC092718.2	MIR1180	POM121	UBE2Q2P6	HAUS6	ZBTB8A	HEATR1	AC018809.2	INPP4A	AP002954.1	GFOD2	ANKRD20A2	SLC44A1	RNU6-658P	ESRRAP2	RAF1	FBXW11	YARS2	RASD1
	RNU6-125P	DUSP14	RRP9	AC090204.1	AC005277.2	CYP27C1	LRRC29	ANXA5	ADH5	PIAS3	PTPN7	IARS2	SNHG25	C12orf77	BBOX1-AS1	LINC00310	RPS6	PLPP1	ANKHD1	LRRFIP1P1
	PNKP	RNF14	DBN1	SLC27A1	CHKB-DT	HSCB	AC092279.1	AC010976.2	AC087294.1	TTF2	VMP1	HPCAL1	DYNLL1	KIF3A	RNU6-516P	AP001434.1	AC073592.1	IL12RB2	MIR3941	IMMP1LP1
	RN7SL792P	AC055764.2	LRRN4CL	M1AP	AL024507.2	TEX38	C10orf55	ANKS1A	LINC01943	SPCS2	IL33	AC106028.3	GNE	AC018868.1	SYT2	PTX4	RIDA	USP7	TOB2P1	AC003072.1
	COL5A2	ZNF343	AL008707.1	TNRC6C-AS1	BTG3	BLMH	RP9	LILRA1	AC114488.1	ZNF33CP	LINC01678	AL354919.2	AC010530.1	GOLT1B	AC003001.1	RPL7AP50	HMGA2-AS1	MROH7-TTC4	TMEM167B	PAK1IP1
	GYPC	RPL3P4	CTDSP2	BRD7P2	RN7SL239P	AC103740.1	RMND5A	RN7SL614P	MED22	AC021755.2	TGFBR1	MGARP	AC119396.2	NODAL	AC025647.1	SPOCD1	AC136475.10	TRIM3	AC112198.2	EXOSC7
	AC004471.2	AC008124.1	TMEM39B	RFX2	RN7SL861P	USP13	LINC01881	RN7SKP297	LRP2BP	NAA10	AC015969.1	AC121493.1	AVPI1	CWF19L2	LINC00574	SCN9A	PTRH2	HERC2P9	DNMT1	GRTP1
	AL021068.1	ZNF444P1	NOXA1	ZNF22	TFDP2	AL121895.1	GTSE1-DT	EEF2K	MIR938	AC073476.3	PFN1P2	SEZ6	LTBP1	SIDT1	MEOX2	RPS5	CHST12	ZNF467	COQ8A	DOCK2
	DDR1	AC084082.1	SEC14L2	FBXO22	AC025171.3	FTOP1	BBC3	MIR635	MIR4633	ERCC2	AC006435.2	CXADR	RNU6-1285P	EFCAB2	NUDC	AC000068.2	SPIN2B	MCM8	SLC25A36	AC108727.1
	CEP76	AMN1	ALG1L13P	BBIP1P1	AC012313.1	SERTAD4-AS1	MPRIP-AS1	SPDYE7P	PPIAP41	ASB7	RPL36AL	AC234783.1	MRPL57P3	AC006064.1	TSPAN3	SAR1AP4	AP000811.1	AC002094.4	RAPGEF6	SEPT14P4
	CABYR	PECAM1	RPL23AP75	RNASEH1	AC005020.1	CASS4	TMEM255B	AC026401.3	E2F1	PIM3	PSENEN	AL110118.2	LINC01842	SRGAP2D	N4BP2L2	AD000813.1	ABRAXAS1	TRAF6	LDHAL6FP	RPL19
	VPS16	AC115837.2	AC243732.1	AC090181.3	LINC01690	GTF2IP9	SEMA3A	EMILIN2	TRAP1	XIRP2-AS1	TOGARAM1	TOMM22	AC092171.3	EEF1A2	ZNF778	CLDN5	AC012531.1	LRRC14B	LINC01952	AC025038.1
	AL359504.2	KMO	WARS	KRT9	FTH1P7	HLA-DPA1	RNU6-1136P	MRPL54	LINC01990	MTND5P11	SNORD113-4	AC004908.2	TESK2	AC113192.4	RPL32	SLC2A10	DUTP2	CCDC142	SLC26A5	AC138356.1
	FADS1	IMPDH1	ANKRD45	ZNF469	FLOT1	ZNF239	METTL4	KRT8P33	AL078612.2	CXCR4	FENDRR	MIR3117	ARHGEF26-AS1	PPIH	RF00601	AL162377.1	TET2	TRNT1	PIP4P2	AC016396.2
	ADAM28	EPHA3	PTHLH	AC244197.3	ACTG1P15	SULT1A1	IMPA2	GAS2L1	RPS27P16	SNX19	AC125807.1	C11orf72	ZNF93	ZNF211	MIR598	SDHB	AL035411.2	DHFR2	AL354989.1	SPINT1
	HS3ST3B1	AL133353.1	AC068446.2	RPL32P3	FAM43A	ZNF549	AC090589.3	AL139423.1	CFAP58	AC008494.1	AC093734.1	ITCH	TDGF1P7	AQP4-AS1	DNPH1	S100A12	C22orf24	AC087241.2	MDN1	RBL2
	IL6STP1	DDX54	AP000640.1	BRPF1	SRGAP1	JPT2	EBF3	HRC	AC034111.1	MCIDAS	ZNF345	AC009268.2	MCM3AP-AS1	KLHDC7B	PFN1P8	BHLHB9	CHRNA5	AL353768.1	EDNRA	CCDC174
	CDK10	ATXN7L1	TIMM8B	FLCN	TMPPE	TNFAIP8L1	AC009065.3	SUMO2P19	RXYLT1	AC239600.1	TMEM121B	PCSK1	SNORD116-3	LINC02669	AC097065.1	P2RY4	TEX21P	PFN1	GABARAPL1	FANCI
	CAPZA1	AP5M1	AC020558.2	LINC00944	RF01161	FKBP7	EGLN2	AC090772.4	ENTPD7	AC022634.2	LINC01144	TUBD1	HERC5	EEF1A1P33	FYB1	CEP295NL	CASTOR1	GALNT5	PIGL	AC061965.1
	BX322650.1	OGG1	FOLH1	RALGDS	Z98885.3	SIPA1	LINC00106	AC103810.5	TSHZ2	AL138756.1	OSER1-DT	HLA-C	LLGL1	PSME2	PABPC5	RN7SL426P	LINC00114	AC079630.1	AFMID	CDC42EP4
	ARMC8	GDPD2	AC021739.4	AL357146.1	AC020978.1	LIPC	SLC35E1P1	PTGFRN	AC087164.2	PHKA1-AS1	MIR4701	PGBD4	SLC7A5	TRUB2	AMFR	AC005695.1	MESD	RN7SL395P	AL139132.1	RNU1-27P
	LLPH	MCL1	CD300LB	AP001269.3	RN7SL22P	RNU6-137P	SINHCAFP2	AC113346.1	CACNA1C-AS2	RGS1	OR7E101P	FLYWCH1	AC129102.1	ZNF641	PTBP1	ZNF286A	AL136988.2	F2RL1	BRPF3	C9orf66
	AC102953.2	KRT8P46	NR1D2	RTTN	AP000919.3	AP3B2	CYS1	CARS	ABCB7	ASAP2	CHCHD6	SGTB	CDKN2B	KIF2A	SNORA80E	AC010976.1	U62317.4	MRGBP	SOD3	ALOX12
	CCDC121	FANCM	FIGN	AC005498.3	HLA-DQB1	AL139011.1	AL049647.1	CCDC26	AC078980.1	CXCL12	ECI2	SELL	MIR1272	RNA5SP527	ZNF730	RNF165	LINC00957	AC109326.1	AL360093.1	FANCD2
	C14orf180	SPRYD3	WDR86-AS1	HAS3	POLR2J	FFAR4	AC079089.2	RAC1	AC024940.3	ITPKC	AC067838.1	AC116407.2	MRM3	FASTK	AL590666.2	LACTB	GTF2A1L	C2orf92	AC023162.1	ZNF92P2
	MIR661	SBK1	DUXAP9	TAS2R6P	KAZN	AC091167.6	FMN1	AL022067.1	PELI3	CIB2	AC009121.1	HECTD2	AC008870.2	FTH1P2	DUSP1	MT-ND5	EMILIN1	NAV3	AC093525.7	NBR1
	AP000523.1	AL450338.1	AC020763.1	EXOSC4	INTS11	PPFIA3	AC127502.1	ROR1	PDE6B	FAM47E	IL6	TRIM50	TIE1	MIR361	HCG27	IL12RB1	UBE3B	TMEM86B	RPS20	RN7SL487P
	YWHAQP6	CHSY1	POU2F2	AC068724.2	AC009955.3	ATG16L1	TRABD2A	NDUFAF2	TBPL1	C21orf62-AS1	GAPDHP37	RAB30-AS1	DNMBP-AS1	ZFP14	MATK	AC010809.3	COL13A1	PTGIR	SPATA20P1	TIMM23B
	SH3BGR	XPO1	MT1F	AC005324.3	SUPT20HL1	BOC	AC020907.3	SMIM20	AC012433.1	SNRPG	NR3C2	AC008622.2	C11orf71	ENTR1	NEFH	AC124242.1	MTND4P14	AC007386.1	LIX1L-AS1	DCAF6
	LYAR	GLG1	TUBGCP3	DANT2	FBXO21	MAT2B	MSH5	TMEM168	RTBDN	EBF2	PPP1R10	MIR5692A1	LHFPL2	PRDX2P3	RUVBL2	ACAP2-IT1	DBNL	IFNGR1	IPCEF1	METTL26
	AL356417.2	AC021086.1	DRAM2	STK32A-AS1	AP001885.1	ROBO4	DPYSL3	ATP5MC2	AL358472.2	AL161935.1	EBLN3P	AL365356.1	COL4A3BP	XRCC2	ZNF107	STK25	PATE2	CCN1	AC079140.2	RGS18
	FRMD6-AS1	AC233280.2	GADD45A	MMP9	PDLIM7	ADNP	VCPIP1	MIR3671	AC134407.3	AL590143.1	NEDD4	LENEP	AC008750.8	RETN	AL136984.1	AC108704.1	AC126118.1	AC092634.4	AC245060.6	GNG5
	C6orf58	COL12A1	BRMS1L	SUB1	ZFHX4	ZSCAN12P1	RNA5SP132	ASF1B	IL21R	GHDC	AC005838.2	PNMA6A	CNGA4	NBEAP1	TANC2	AC012146.1	LINC01605	AC100788.1	AC138811.1	ATG4D
	RPL7L1P9	RAD1	ANO3	AC004223.4	CASP1	SEC62-AS1	WFDC3	FP565260.3	CD300LF	ANKRD20A4	AC064850.1	YTHDC2	RPS13	OSGEPL1	MIR7974	AC069307.1	LEAP2	AVL9	GFOD1	AC008073.2
	SPATA18	ACTN1-AS1	AC007038.1	AC092490.3	AL162595.1	AC008758.2	BCO1	ANG	AL669970.3	MAPK7	MORF4L2-AS1	PMEPA1	TMIGD2	AC114402.1	CCDC88B	RPL41P5	ASXL2	BRCA1	RBM20	SMG9
	ZNF878	AL451105.1	AC026150.1	PPP1R26P1	ITGB1	FAM24B	STK16	AC007638.2	ACYP1	HPGDS	Z97055.2	AC080188.1	PMPCB	AC012618.1	LENG8-AS1	MLH1	SP6	LINC01133	FHDC1	RPS15A
	PRDM4	AC131902.1	MRPL44	COX19	URB2	PYGM	AP000785.2	PSMD10P1	PRR7	AC005329.1	CLIC4P1	SUZ12P1	C1orf127	PPIC	DPT	AC040914.1	MIR4453HG	CXCL8	AC022306.1	AC097103.2
	AL008638.3	GMEB1	SNX3	AC025265.1	RNA5SP288	RAMP2	RPL10	STAG3L1	TNNI2	PTCRA	ZNF140	ARNT2	KBTBD3	ACSL5	MAN2A2	CENPF	SH2B2	EIF5AL1	RN7SKP173	EPHB3
	H3F3AP2	PROCR	LINC02450	KAT5	SNAI2	AC011411.1	AC032044.1	AC127024.4	AC078785.1	FLG-AS1	SLC39A13	PAK6	C19orf73	AL645949.1	RIC3	AC016747.1	AC135050.4	OR2A7	RNU1-129P	AC138028.1
	AC117503.4	OTUD1	LRRC6	AF131216.1	NAA60	U91328.3	TSPY26P	CABLES2	AC093536.1	ARF5	GMFB	GIGYF1	CCDC80	AC138696.1	RASGRP3	MRPL47	AC109992.2	AS3MT	AC090607.2	MAFB
	UTP25	VAMP3	BYSL	STXBP4	PLEKHH3	AC131009.1	AGO1	AC022634.1	PIK3R2	AL589666.1	PGAM1P8	AC011477.3	SNORD63	IL20	AL731568.1	PNPLA8	AC000123.2	SELENON	AC006033.2	THADA
	EMC2	AC243960.3	NMNAT3	C5orf22	AC006270.1	ADGRE1	ENPP7P4	AL606469.1	BX284668.4	AC120114.3	AC006252.1	AC107021.1	RIBC2	NDUFB8	NEK9	TMED1	AC012213.3	KCND1	TMLHE-AS1	TGFBR3L
	AL590609.2	AP000787.1	AC064871.1	MKNK1-AS1	RPL22P2	AC022613.3	TLR8	IL27	RN7SL771P	AL049597.2	AL121845.4	AC007563.1	RHBDL1	PLEK2	AL162231.3	SIK2	AC073964.1	MEX3B	TTLL11	CEP78
	VTN	AL049844.1	AC018628.1	RBFADN	LINC01426	CCDC183-AS1	SUMO1	ANKRD27	ETAA1	CDC37L1	SEPT5	CFL1P1	SOCS4	CCDC27	NUP205	ANO7	CCDC190	RARRES1	AL009178.2	AC008443.7
	DDX6	FKBPL	FOXJ2	TOP2A	NIFK-AS1	GPR39	FAM122B	AP4B1	ZNF664	XPO4	FLNC	RASGRF2-AS1	EIF3K	ZBED6	SEPT11	AC133473.1	AC092658.1	ZEB1	AC106795.1	P2RY13
	ZNF718	PAFAH1B2	YWHAH	AP001065.1	GPR158	UFL1	TH2LCRR	AC116158.1	MTCO3P11	AC005632.2	BX664727.3	AL121839.2	XPNPEP2	FAM76B	AC100810.1	DNM1L	ACSL6	MAN1A1	CWC22	UBAP2L
	PPP1R26	LINC00839	GAPDHP71	AP001469.1	FGF7	AC011625.1	MICA	AC055811.3	DLX6-AS1	AC107029.1	AL591895.1	AC004678.1	LINC00235	AC007608.1	SNORA15B-1	CTU2	BNIP1	LINC02391	SRRD	AC002310.6
	AL138799.1	AC118754.1	USP8	AREL1	DCUN1D5	TRDC	AC243830.1	AL596087.2	NOP16	SEMA3F	S100A13	PARP8	AC004893.1	IL17RE	OLA1P1	RAB33A	RNU6-574P	PLCD4	MIB1	SSX2IP
	LINC00173	ALG13	CENPU	CELSR3	PCCB	AC005498.1	PRDM1	AC103740.2	ATP5F1C	MTIF3	CHRM2	SNORD116-12	CCND3	DAZAP1	CLCN3	SRRM5	C1orf229	AL158207.2	ACSF2	THBS2
	KCNG2	AC080188.2	AC098934.1	RNU6-1262P	ADGRB2	CHKA	MTFR1	ZNF543	AGRN	HS3ST3A1	LINC01711	RBM5	AC008759.3	AP000446.1	COL3A1	NDUFA13	TAS2R15P	XYLT2	LINC00869	ABHD1
	LRCH1	KLC2	AC133552.1	EMC10	TRIM35	MT1HL1	AC073343.2	FAM66B	CBY3	MIR3151	TNFAIP8L3	CAB39L	FAM49B	AKAP3	DDR2	SCARB1	FOS	CYB5D1	AC131159.2	ANO7L1
	PNCK	CATSPER2	NOL7	RPL29	SUDS3	PTDSS1	PPOX	KLHL15	LINC01298	AC114801.3	AC025159.1	AC123912.1	ANKRD44	RNU6-807P	AC006449.3	AL512343.2	ZC2HC1C	POP5	GAB3	BLZF1
	SNORA33	TEKT4P2	SNHG5	CCS	TSC22D1-AS1	EDRF1-AS1	SH3GL2	AL590093.1	RNPEP	ENO1	TARDBP	RNU6-26P	ZNF660	AC135050.1	KIAA1671	EVI5L	GZMM	B3GNT9	AC093305.1	ZFR
	TMEM150A	AL358115.1	SNRPD1	XIAPP3	ETS1	MINDY1	SNORD116-25	GCAT	CWC25	HIP1	ZBTB9	AC126177.3	USP32	SMG5	MRGPRF	ZNF518A	AP000907.1	AC022568.1	KCNH4	CAB39P1
	ABALON	TRANK1	COX6CP2	AC096537.1	MTCL1	ARHGAP27P1-BPTFP1-KPNA2P3	AC069257.1	CGGBP1	HIST3H3	PEX13	RPL12P8	AC007552.2	USP9X	HDAC4	AC019193.2	AP000350.6	AC091182.2	RTN4IP1	ZNF354C	PMS2P4
	INTS6L-AS1	RPL18AP3	EFCAB14-AS1	SLC44A3-AS1	RPS6KA2	ACAT1	SNRPA1	PSMD8	EXD2	CYB5B	HOOK3	AIFM3	FAP	CLEC5A	JARID2	RN7SKP228	PSTPIP2	EGLN1	CEP95	AP000648.3
	CIAO2A	GATA3	AC022868.1	TGFA	FAM177A1	ZNF728	AC092802.3	NAT9	AC009102.1	SND1	CCNJ	PSMA3-AS1	ZRANB1	RPL35P1	AC012645.2	CDRT1	NUP58	CNOT2	AC006539.2	CCNDBP1
	RNU4-21P	AL162385.1	AC018816.1	SMUG1	BST1	ZNF385D	RBAK	TERF2IP	GLO1	RPL22P19	AC007786.2	IGBP1-AS1	AL031666.1	AC093895.1	AL133371.1	PCDHGB3	UBE2G2	AL122035.1	AL591767.3	SLC19A1
	AL096803.1	SLC22A23	PDXK	AC124303.1	LMF2	PDK4	GNPDA2	MCRS1	DRC3	AC010435.1	NKD1	ASL	PIP5K1A	AL391994.1	AC104938.1	PHF11	ALS2CL	MIR34AHG	AC005104.1	NIFK
	AC105942.1	TMEM212	MIR5684	DLG3-AS1	ENTPD6	CHCHD2	DNM1P33	PRKCSH	PER2	SNORD13D	AC117395.1	AC008481.2	RAB12	RNGTT	PHLPP1	LINC01629	RNF31	KIAA0232	BNIP3P30	C11orf54
	SNX6P1	ZNF592	BAIAP2-DT	ST20-AS1	AL592211.1	USP32P3	TPRG1L	JUND	SNORA73B	CDK9	CCDC107	AFTPH	FGF22	ARID1A	FADD	C1S	EEF1AKMT3	PSMA2	DMAP1	CLEC1A
	FNDC1	RN7SKP163	EIF4A1P2	CDK5	TULP4	RANP3	AC002059.1	SATB2	AL391840.1	ZDHHC8	SBDSP1	Z98752.2	TPRN	MICE	AL031714.1	AC024568.1	CNTRL	EGFL6	PSMD3	TRAJ29
	AC055876.3	MIR30C1	AP001830.1	AL049552.1	AL109933.4	ZDHHC5	AC012368.1	APOC1P1	OGT	CRMP1	AC024361.2	AC027544.1	DEDD	AC011373.1	AC009299.3	ADGRE2	ZNF443	STX1B	SMYD2	NADK2
	HPS1	ROM1	RNU6-1189P	RBMS1	HADHA	DNAJC27	RPS3AP44	CPO	AC089987.2	ASB9P1	MIR760	CNTNAP3	RFX3-AS1	CXorf38	MYC	CHD5	TMEM202-AS1	ADI1P2	FKTN	AC135178.2
	HMGN1P2	LINC02126	AC009093.3	PODXL2	BCL2L12	NNMT	AL109917.1	SIGLEC16	AL158834.1	LINC02447	MX2	LINC01684	EXOG	ACTG1P1	RNU6-236P	USP49	TSPAN11	ARHGAP31	RAB17	SIAE
	COL27A1	CORO1B	TSHZ1	HAGH	UCHL5	TIMM10	CNOT10	PPME1	AL132780.1	USP22	AL928654.1	DBR1	BET1L	BRD7P4	RNU2-35P	PRKACA	RPH3AL	RPS21P1	FAM111A	SNAP29
	TMC7	AC109454.1	XRN1	AL035530.2	RPS23P6	SEPT7P7	PRDX4	C15orf48	PPP1R18	AC113192.1	PEX14	LINC02510	AC010547.1	CFAP97	AC113383.1	PHF1	GOLGA8EP	SUCLG1	CHCHD5	TCEA1
	IRAK3	AC005726.2	CRB1	AC095032.1	AC117532.1	MIR151A	DCAF13P1	GRK3	SLC12A5	RPF2	EEF1B2P6	AC040162.1	NPIPB3	BANF1P1	AL353754.1	AL357936.1	LINC02544	AL353622.1	ZNF663P	AC010904.2
	C4BPB	GAB1	OR7E102P	GAPDHP2	ZNF662	C2orf88	SARS2	AC011890.1	KNL1	AL928711.1	FTH1P10	TRIM32	RNU2-17P	LPAR1	AC009948.3	KCNIP2-AS1	AC020898.1	SERPINB9	AL117336.1	AL022310.1
	AC063976.2	TTLL12	AP001893.1	RN7SL569P	HOXB5	AC009303.1	MTND4P26	RSRC1	ALDH8A1	PAK5	DSTNP4	AC104534.1	SLC25A39P1	KCNK7	AC015819.2	SLC22A20P	AC092118.2	CLEC4E	SNTA1	METTL6
	Z97633.1	CYP51A1	AC068733.1	VMAC	SMARCA2	BCAN	CLSPN	CMTM2	PTRH1	RN7SKP43	ADCY4	AC109449.1	AC008440.1	RN7SL566P	FBXL18	POLR2C	PTP4A2	MLST8	TXLNB	VSTM5
	C14orf132	AC108471.2	COA6	QRICH1	CCDC24	FAM167A	RPL21P54	AC063977.6	ZFP91	AP001372.1	LCMT1	CMC2	NEK7	CENPK	HEXIM2	AC068473.5	C14orf119	GTF2H2C	ACAT2	RERG-AS1
	ZNF815P	SINHCAF	P2RY8	KCNK2	ADAMTS1	ZNF436-AS1	RPS19BP1	CEP126	ANKRD61	AC010618.4	CNIH1	TRPM4	NDUFS3	TRAM1	AC135048.1	AC136475.8	AC004593.1	STK24-AS1	AP001148.1	ZNF805
	AC125611.1	C1orf174	NT5DC1	NUDT16L1	ZNF570	MAFTRR	UNC119	FAM181A	RF01518	HMGA1P2	TBC1D9	RNU6-190P	NCAM1	AC007405.3	RYK	PGF	AC092802.1	AC105219.1	ZNF789	LGALS3
	AL606491.1	AC091167.4	CBX6	RPS2P46	ECHDC2	GZMA	AL139353.2	ST6GALNAC4	FAM201A	GAB2	OGFR	RSPO3	RN7SL75P	SUMF1	THOC6	NXF1	KCTD9P4	SDCBP	AC009093.7	TMEM204
	CYP21A1P	LINC01450	AC083862.1	FMO4	RPL9P9	PLXNC1	NICN1	AC012313.2	TTC30A	AC132192.1	WDR62	BTN3A2	AC079781.1	AC000068.1	ACACB	ERCC3	ARSG	AC008629.3	AL355472.2	RPL22L1
	AC008267.3	RPL36AP39	TTF1	PTPRH	Z93930.1	TMEM225B	RBFOX2	CATSPER2P1	RN7SL381P	NR2F2	AC097382.2	FGD2	PPIL1	SBSN	DEFB109D	MIR3942	NME8	RPS2P55	DNM1P41	PKD1P1
	AC092296.2	RTN1	POLB	AL136084.3	MTND1P14	TXNDC9	MAD2L1BP	CSPP1	POP7	AC006213.3	DCAF4	TAS2R31	ZNF117	AL365181.2	AL590438.1	ATP5F1D	IER3	IP6K2	AC092924.1	AL049840.2
	AC007663.3	PISD	AC103810.1	AC244093.5	AL392023.1	MAGOH	AC104758.1	MS4A4E	AC026369.2	ARPC2	IRS1	ZNF622	FXYD1	CHMP4B	MGAT4B	AL353616.2	AL445363.1	SMC6	MYL5	AC025165.4
	MPST	KIAA1211L	RF01293	CEP85	AL138960.1	TIGAR	AL359541.1	IL13RA1	ACADSB	UBL3	AC074367.1	SCAMP1	AC020907.4	AC026271.3	MIR3176	MIR8055	ARMC4	RN7SL15P	AC139530.1	AC104073.2
	VCAM1	NSD2	DTWD2	PCDHGC5	RN7SL574P	AL357500.1	LIPT1	RPL18P10	AC008895.1	SPIRE2	AC108047.1	LCP1	STT3A	VNN1	AC008982.2	STYX	TNFSF10	ANO4	HSPG2	PMPCA
	RNF113A	GRIA3	AP003071.1	ATG2A	AC025283.1	AP000866.2	HLF	GXYLT1	FSD1	STK24	TMEM91	CXCL6	AC147067.2	MT1G	PFN1P4	ROMO1	BICDL1	RPL24P2	RBMS2	AP003096.1
	QRSL1P3	MTND5P14	TMED2	AL357055.3	ZNF23	IGSF22	RCC2P6	AL023653.1	C19orf53	AC022445.1	MIS18BP1	NGFR	IGSF1	ZNF251	MIR454	CRYL1	DCTN4	LINC01550	DTX4	NAV2-AS3
	DCHS1	ORC2	CDKL3	SNX1	TCF19	COIL	AC008627.1	AL139246.2	TMEM88	EFL1	RFLNB	RIPPLY3	MIR4258	TMEM80	ACTR2	RAB8B	PTPA	CLDN7	AP003068.2	CDK5RAP3
	GXYLT2	CD52	C16orf45	ABCB8	SSNA1	AC007787.1	SMYD4	AC079922.1	TLK1	RNY1P16	ZNF571-AS1	MICALL1	S1PR4	MSC	DDX39B	ZDHHC12	ADCY6	AC025283.2	AC010719.1	AC136475.4
	WDR83OS	AC140479.2	RF00614	AC013474.1	IFITM10	SPDYA	RPL5	RNU4-39P	AC117500.2	RARS2	Z97055.1	RAB11FIP5	WSCD2	AC026254.2	RPS21	FAM171A2	TAP2	HLA-DOA	C19orf38	ZNF727
	SLC39A2	AC004024.1	Z94721.2	AC010878.1	ERCC5	ATP5MC1P4	HELQ	RAD52	TMF1	UBE2QL1	RN7SL443P	TOP3B	MTATP6P11	PHF6	MSH2	RNU7-55P	PLEKHA1	AC087343.1	FTH1P3	AC254562.3
	IL2RG	SLC16A11	PDCD6	DRAP1	RN7SKP52	LAMP2	NAA35	AF131215.4	RNU7-75P	PLCD1	AL157400.4	SH3RF2	HTD2	LRRC37A16P	APLNR	RNU6-834P	USP54	C8orf44	AL589182.2	GCNT7
	BEX3	TTC21A	CABP4	RGL3	AC087516.2	SNORD9	IL1R2	RCOR1	AC015804.1	DIO3OS	MAGI1-IT1	ACTR6	GATA5	SCN2A	AC093162.2	CACNB3	NCBP2-AS2	MED9	NEDD8	ETV2
	RPL7P9	IBSP	NT5DC2	RABGEF1	ZNF362	IFNAR2	PFN1P3	DBF4B	PARD3B	GDPGP1	AC008417.1	RAI2	RNU6-748P	ESYT3	TASOR2	DESI1	ZRANB2-AS2	PRR5-ARHGAP8	TRAJ24	AP001972.1
	ATP6V0E2-AS1	LPXN	MTHFD1L	FBXO6	AL157904.1	PHB2	AP001043.1	PLEKHG1	AC006059.1	RF00561	SKA2	IFT80	RAB32	MSH3	AC104794.2	THAP1	NRP1	ENPP7P6	RPS18P9	RPL7AP2
	ZNF460-AS1	PARP3	AL031727.1	LY6E-DT	AC113410.1	AL008582.1	TMEM63B	AL135746.1	MTHFD1	TIPRL	RCE1	GAS6-AS1	LRP12	RAB11FIP2	MTBP	CLVS2	MISP3	AC090578.1	AP001972.5	AC091982.1
	CAAP1	SV2A	MNDA	CARNMT1-AS1	SLC25A3	LOXL2	AC011500.3	AC005383.1	MEG9	AP005131.6	AC003681.1	PRKN	LINC01322	PRC1	AC011912.1	FAM117A	MT-ND4L	LLPHP2	DHX9	IRAK1
	AL137058.2	AL356599.1	AC022558.3	IL22RA1	BTBD18	ODCP	AL136968.1	TMEM120A	BTNL8	SMURF2	AC138409.2	TRIM69	SEMA4C	PAQR4	AC090286.2	NOVA2	AC021739.2	MIR3136	SMIM2-IT1	FAM228B
	CENPI	SIX5	LINC00304	AC016559.2	DPY19L1P2	AGBL2	AC231981.1	AC104653.2	MKI67P1	SLCO5A1	AL773545.3	AC108475.1	GRAP	HEY1	ITGB1BP1	CACNA1C-AS4	MT2A	LPIN2	MIR1289-1	TEDDM1
	RPL21P32	AC007494.1	AL133260.2	RXFP1	GSTP1	AL513523.2	CDC42P3	SUFU	CWC15	FAM174B	B4GALT2	ZNF503-AS2	RABGGTB	RNF111	AL512637.1	FBXL3	RN7SL246P	TSC22D2	AL354920.1	AP003032.1
	FNDC9	MIR641	RNU6-708P	QSOX2	PCDH10	CD7	RFC3	RNF135	AC026470.1	AVIL	AP003355.3	HMGN1P8	DYNC1I2	PSMD7	RBM15	LINC02453	RF00264	CCDC86	CCL18	RNU6-1053P
	AC245884.12	AL592293.2	AC006160.1	PIGM	CDC42EP3P1	SLC3A1	RPL7	RPL17P22	NELFB	STX8P1	FABP5P7	DEUP1	PSMC4	BNC2	TMPO-AS1	GPR63	AC119044.1	ARL17B	LINC02308	BTG4
	OR6L2P	PLEKHF1	SLC13A4	BCL2	AC068875.1	ZNF20	AC006994.1	S100B	TMEM117	CD81	TRAPPC10	NHEJ1	RNU11-2P	HNRNPA1P48	ZNF767P	AC105052.1	PTPN11	CYTIP	TNFRSF10A	AC011933.1
	RXYLT1-AS1	ATG13	FBXW9	AC125618.1	TMEM106B	MNS1	TAS2R5	BCLAF3	RPRD1B	AC006450.2	CNN2P1	AC022035.1	LINC00511	ZYG11B	SNX18P9	TOP2B	FABP5P3	VPS26C	GIMAP6	AC114490.1
	SATB1	STOX2	RASGEF1B	AC135803.1	RN7SL98P	SNX18P13	NTN1	ATP6V1H	AC026801.2	SIGLEC12	FAM225A	ENPP7P8	NEPRO	AC025682.1	SDCBP2-AS1	COL4A1	DHRS4-AS1	AC244669.1	PPM1G	ZC3HAV1
	SPDYE6	DNAJC15	SOCS5P4	NPIPB6	EXOSC10-AS1	UPK3A	AC134312.5	AC020931.1	AC104073.1	KCTD6	KIAA1755	INPP5K	APPL2	SNAP47	MAP3K8	AC039056.2	SPATA5L1	TYSND1	ZBTB14	AL359513.1
	TEDC1	CLIC3	POM121B	SIX1	PEPD	AC010327.3	POLD4	SART1	AC004241.3	PGM2L1	TFEC	MYO18A	AC108063.1	RTL6	DPP6	SH2D7	MTCO1P39	ITGA6-AS1	CHST1	RPL17P36
	AC136489.1	RN7SKP5	AC117834.1	ATG9B	BDKRB2	NFYB	AL023755.1	AC131649.2	CWF19L1	RNU6-479P	ADIRF-AS1	MAP1A	RAB13	AC093157.1	ATP2B1-AS1	AC079834.2	AC010998.1	RCC2P7	NR1H3	C18orf54
	KLHL4	CPN2	AC078828.1	AC243836.1	ABCD1	ECE2	MIR32	AC093525.9	DNM1P35	RNU5B-4P	FUNDC2P1	ELOCP19	GATAD2A	AL138781.2	AC015908.1	ARHGAP21	PIK3C2B	MIR2467	AC068657.1	AC131182.1
	AL117209.1	ZFAND2A	AC080038.2	SMAP2	GAPVD1	AL022328.2	PIK3CB	COPZ2	ZDHHC19	EDRF1	AC136475.2	GRB14	AC087752.1	MTG1	LSM2	AC008969.1	RNU2-13P	UBA3	RBKS	ALG1L12P
	HHIPL1	C6orf223	KRBOX4	UTP23	STPG1	HNRNPA1P38	ADAMTS6	KIF17	MASP1	RNU2-22P	ARSEP1	PIH1D1	DDX56	RSPH14	CINP	ZNF134	NTN5	CXCL3	HS1BP3-IT1	AC007387.1
	AC005041.3	ASS1P12	ZNF195	PPIAP91	SH2B1	RNU6-878P	CCDC61	KPNA3	TBX18	CYCSP52	AC018643.1	AGAP4	RNU6-495P	ARHGEF25	NUP153	MATN2	RN7SKP285	ZNF106	AC093278.1	AC079922.2
	AC108134.3	C9orf153	SF3B6	TBC1D16	IL11	AL357874.2	PEX10	TRBC2	LY6E	AC008429.2	RDH11	IKBKB	PKD2L1	AC023158.2	EAF2	ENDOG	PABPC1P4	AC010261.1	PXN-AS1	EIF1AXP1
	AC040169.3	DHX29	HEATR5B	NRSN2-AS1	ARFGEF1	DNAJC7	LAP3	AL158071.2	AC018992.1	MSTO2P	MRPS31P5	AL591438.2	KCTD11	ROPN1	SP1	SLC2A1-AS1	AL590560.1	KCTD17	EIF2B3	KRT8P10
	SNHG7	FAM168A	AL583808.1	TMEM209	FAM189A2	GPATCH1	SNORD113-3	ZNF512B	SNORD116-27	EIF4A1P4	SLC35C2	CCDC144CP	AL023881.1	FAM13A	MPG	TUBB	ZKSCAN7	ANXA2P2	RPS25	RRP1
	PPIAP90	LINC01545	FNDC7	AC006254.1	LINC00298	ELAC2	AL031600.1	EDC4	MKRN2	ZNF132	LACTB2	PNMA2	CLUAP1	ZNF724	GNL3L	SMOC1	HMGXB3	SMKR1	AC073911.3	ZNF528
	AL355490.1	B4GALT4-AS1	ILF3	ZNF740	PRMT9	ASNA1	AF064860.1	ZNF428	AC145285.2	ARHGEF10	STIM1	LENG8	FRYL	TMEM138	BEX4	LINC01808	AC010761.7	TMEM121	TMEM74B	AC022148.1
	AC018462.1	LARP1B	IL17RC	CAPN11	SLC7A8	LINC01235	RTCA-AS1	CORO6	MIR3143	AC016700.2	FBLN1	BBOF1	TCEA1P3	EML3	RPSAP18	AC091013.1	NDFIP1	AC005786.1	PRKXP1	WSB1
	AC023983.1	AC011511.5	PSMB1	USP51	ABCD3	AC010809.2	AP003110.1	CCDC175	RHBDL2	AC073592.3	AC007969.1	MYL6P5	ZKSCAN2-DT	KCND3-IT1	LINC01535	TMEM263	RIN2	AMIGO2	SENP1	C11orf80
	AC091675.1	AC245100.8	TNS3	AL356441.1	NUDT14	TMEM229B	DLD	B3GNTL1	AL049840.3	AC007785.3	MIR27B	NOMO2	AC005899.8	AC006004.1	MYCL	HADHAP1	AL445228.2	RNF187	PPP1R26-AS1	AL021937.4
	HSF2	MIR4312	AL591135.1	OXA1L	CARD10	ZNF638	ACTBP11	MED8	C21orf62	AC093323.1	AL591503.3	AL008726.1	HKR1	ZNF121	C19orf48	WRN	THSD1	PITPNM2	AC020904.2	MMP11
	AC068620.1	C17orf113	AC113398.1	ADCY3	CYP27A1	NRAV	CRABP2	SMIM7	ZNF281	BX649601.1	MGAT4A	AL136115.1	AC025809.1	DDX60	AC012213.1	CAPG	INO80C	LNPK	PPP1R14C	ZNF396
	ZNF76	AC115618.3	DCUN1D3	CDH24	SPRY2	EFR3A	AC106028.2	ELMOD2	RNF10	ABCA1	ZNF318	AC100803.1	LINC02596	MYO6	ORMDL3	AGAP2-AS1	ZNF18	POLH	TNFSF12	AC026979.1
	TEX12	SNORD116-19	ESF1	AC022960.1	AC127070.4	CLHC1	MSANTD3-TMEFF1	AL138963.1	AC012493.2	44256	GBE1	AC009950.1	TUBB8P1	ZSWIM5P2	HTR7	G0S2	CAVIN2	DYNC1I1	SCIMP	TMCO4
	DUSP5P1	PTTG1IP	LGALS3BP	AC008543.1	CDKL2	PC	AC007362.1	MYO3B	PRORSD1P	S100A3	KIAA0825	AC023855.1	RASA3	AC105020.5	PELP1	AL731571.1	SLC35E3	RNA5SP382	RPS27L	HOXC11
	AL354685.2	RPS2P35	SLC26A2	GPR179	IVNS1ABP	STMND1	PLD6	TAF1D	POLR3H	RAN	SLF1	YIPF6	PALB2	DIRC1	AC007497.1	NFKBIZ	PHC2	AL121760.1	LINC01396	AF233439.1
	PPP1R1A	C15orf56	PCP4L1	ANKRD20A11P	AC099522.2	RNU6-652P	AC106796.1	NFKB2	GPLD1	PMS2P9	AC093158.1	AL135905.1	HIF1AN	NCOA4P2	MUC20P1	FAHD2B	RNA5SP311	MT1XP1	FAM110D	AL356756.1
	AC132938.5	PRCP	MIDN	SPTSSA	TOR1A	ARFIP2	ZGRF1	AC090409.2	DKK3	RN7SL652P	MCMDC2	AC008806.1	SNX2	MGMT	AL590068.1	AC002558.3	AC005225.1	AC105265.4	AC093151.2	RPS5P2
	ZNF184	CANT1	TJAP1	TMEM159	AP006621.3	AC027020.1	RPSA	NFIA	GDF6	TMSB15A	AL031673.1	FUNDC1	DUSP4	ALKBH7	AC084824.3	IMPDH1P5	SGSM3	OCIAD1-AS1	ASB9	MCM6
	RPP40	ITM2A	GDF15	AP000442.1	UPF3AP2	RBM4B	UBXN1	RPL22P16	AC131392.1	SULT1A2	TPCN1	RN7SL510P	ANKEF1	ARV1	AC009318.1	STAG3L5P-PVRIG2P-PILRB	ADAM20P1	COL6A1	AC021028.1	CR769767.2
	MIB2	ARF1	SUPT4H1	AL162425.1	TPI1P2	MCUB	RPL8	AC013394.1	POLR2E	LINC01772	GPR160	SSBP3-AS1	PCGF7P	WWTR1	AC020612.3	DUSP5	SLC7A3	CCSER1	FUT1	AL157996.1
	KIF23	AC018695.4	SCYL1	UBXN6	TAX1BP1	UQCRHP4	AC006449.5	AC006001.3	COX7A2P1	TMPO	CPLX1	NUS1P1	COL10A1	TCEANC	FAAP20	CCDC148	PDS5A	SUSD1	AP001372.4	TMEM102
	C1orf74	NRIP1	ZNF667-AS1	AC092755.1	LINC00894	AC073263.2	LINC02600	AC005410.2	AL008721.2	LINC02207	GVQW3	UBXN7-AS1	MTATP6P16	ZNF680	FTH1	CPM	AC100854.1	GGCX	U73166.1	SAXO2
	DDX20	NOS3	AKIRIN2	ADRM1	SNORD117	DOHH	AC005014.2	AC020891.1	INSL3	AC114501.2	PA2G4	TMX2-CTNND1	AC073593.1	NPR2	CTNNAL1	AL136528.2	GPSM2	Z99943.1	ZNF708	AC090617.5
	GADL1	FAM117B	SLC16A4	AL590135.1	EIF4A3	ZNF732	RNU6-387P	ADH1C	AC091271.1	IQCB1	MTND2P12	TCF15	TCERG1	ALDH1A3	MT1A	OGFRP1	ZNRF1	AL356019.2	AC234781.1	EIF1
	FCHO1	PNN	AC016734.1	SRCIN1	AL118508.3	CASC1	RN7SKP251	AL049637.1	AC112907.3	UQCRQ	PXN	HEATR6	CD1D	SLC25A42	LINC00028	AC092666.2	AC011476.3	PABPC4-AS1	ZNF676	SIX4
	PARN	ZFP36L2	KANTR	PSMD9	ASH1L-AS1	AL078603.1	CHP1	WDR72	RNU7-97P	GPX1P1	AP000962.1	AL117328.1	TRPC1	PIPSL	TMIGD3	PLB1	MKX-AS1	CD302	DMGDH	FGD6
	THAP5P1	CBLN3	BX664615.1	AC021087.4	LINC01146	AC012313.5	AC114728.1	IL1B	GRAMD1B	RBM25	AL603756.1	AL139421.1	UHRF2P1	MED14	HSPA8P15	SLC35E4	CDK2AP1	CFP	CHAF1A	AC063977.2
	SPDYE21P	CNOT6	EAF1	PKD1L3	CLEC12A	PLA2G12AP1	H2AFY2	AC107464.3	C1orf50	ZNF830	FAM151B	AC116351.2	AL157788.1	AC007390.2	FAM120AOS	AC104316.1	ATP23	JADE2	AC011374.1	LRRC27
	SERPINA6	DYNC2LI1	ANKRD6	SLC25A19	FRG1HP	AP003469.4	IFITM3	AC100757.2	SNRPCP17	HLA-DRB9	ULK4P3	LRRC3-DT	CDK7	PATE4	MFSD2A	GRPEL1	AL589743.6	FAM215B	AC009119.1	CLSTN3
	TPGS1	ANKRD18CP	AC022919.1	TYMSOS	PLEKHG5	AC087639.1	LINC00607	LTV1	AL031008.1	AL355607.1	PIK3CD-AS1	JHY	TLCD2	CXCL14	AARSD1	AL031432.2	OSBP	RABL6	LINC01645	RNU6-5P
	RNA5SP464	VSIR	AL589684.1	H2AFV	AL023754.1	AC009949.1	DLEU1	AC100778.3	LINC00612	PTGDR	AC023886.2	CEMIP	SNCA-AS1	WDFY4	PLAC9P1	TUBA3D	MTCH1	ZNF321P	POLE	OXSR1
	KDM8	IFT74	SGPP1	SKAP1	AC034198.2	AL359073.1	BST2	LINC00891	FOXO4	EEF1B2	OR2A1-AS1	GSTK1	HOXA6	PUS10	ALAD	CDC37	AP001264.1	AC008105.3	AL353740.1	AC021739.3
	OR7M1P	RPL7P57	FNDC5	AL158835.2	AC233702.5	GRM1	RAD18	AP000695.2	RN7SKP97	FCMR	DLAT	RPS15AP16	AL137222.1	MC5R	ZNF45	MIEN1	BRWD3	AK3	AL136295.7	NBPF11
	LRP5	TBKBP1	SNORD114-3	NCBP2-AS1	MCAT	RETREG1	FRK	AC106801.1	LINC01616	AMOT	UCHL3	ZFP41	RNA5SP435	SUGT1	MINPP1	AC090539.2	AP001189.3	PTPN14	HEATR4	HPGD
	MATN1-AS1	RAMAC	RNU6-509P	AL590705.2	AL355574.1	AL355309.1	TRPC5OS	AL357054.4	MEIS3P1	AC092683.1	AC074029.3	SLC50A1	SLC6A6	PSMA5	COG1	SLC35G1	SFPQ	AC004223.1	RC3H2	AL133216.1
	ERICH6-AS1	BPTF	ETF1P2	AC026356.1	AL513550.1	MED31	ZNF772	AC121758.1	AL672291.1	CLSTN2	AC010422.6	AC009831.1	RNY4P36	TGIF1	LINC01506	SLC27A6	AP003170.1	AC012435.2	UQCC2	AC010247.1
	GPSM1	CABCOCO1	MIR647	RPL41P2	MEG8	MIR4744	AL132656.4	NIT1	SCAMP3	GCSH	AC116456.2	AC018738.1	AP001282.1	CXXC1P1	DTYMK	KIAA1522	SIK3	TSC22D1	DDO	NTN3
	RPL23AP92	SWT1	CD3D	BCKDHA	AC016747.4	ISG15	CXCL13	CCDC114	HNRNPA1P36	CMAHP	AP000797.3	AQP9	PDK1	PPIAP84	AP003170.3	LYSMD4	AL031320.2	RN7SL868P	GSTA6P	ZNF300
	BDKRB1	ANO6	ZNF680P1	RBM48	SLC4A11	DNAJB6	ANKRD13D	LINC02660	ATP5PD	ANTXR1	DPEP1	PANK3	COX5B	JAG2	CES1	KIAA0556	ANKRD62P1	AC093110.1	TMEM106C	AC007349.1
	SNORA38B	ISM1-AS1	SIGLEC22P	EEF1G	BCLAF1P2	RGS9BP	Z93242.1	AC092468.1	BEND5	AC011611.3	PCDHGA2	DUBR	EPS8L1	RPL10A	CHRNB1	KLHL26	TRGV5	HOXA-AS2	CAPZA2	QSER1
	AC068790.2	SNORD19	AC011591.1	HAS2	WIZ	APEX2	RN7SKP69	POLG	AC116447.1	AC010615.1	RPL13AP3	KNSTRN	RN7SL832P	AL596087.1	AC007952.2	RNA5SP474	AC020658.6	ZMYM6	TMEM39A	SPTBN4
	AC103724.2	RN7SL181P	AL451074.3	PIGU	MRPL10	ATG7	KCNMA1-AS3	WHAMMP3	PIN4	COX6B1	LRFN1	AC020910.6	AC068491.2	NDRG2	NARF-IT1	FGD5	SOCS1	CLEC4D	GFRA2	AC103925.1
	NAP1L4P1	SLC25A51	MBNL2	TNRC6C	MSANTD4	RNA5SP323	REEP5	AC136443.1	HLA-DQB1-AS1	SNX27	SET	RNU6-540P	CAPN15	TOB1-AS1	SHROOM2	SPTLC2	CCDC58	AC100830.1	SMOC2	AP002518.1
	INTS13	TSR3	TNIP3	AP001972.3	AP002840.1	RHOA	IL23A	TLR4	FEN1	DDX17	RNU1-36P	AC093908.1	AC004004.1	AC091053.2	CTF2P	PTGS1	ATP6V1A	BMS1P10	AC009955.4	PLA2G4B
	MIR3178	AC012668.3	MEFV	MRPL28	AL122010.1	FCN3	SLC45A3	SOX13	MPRIPP1	RPL39L	MTLN	NDUFA3P1	AC233701.1	RNF138P1	AC011466.3	AGFG1	ACP6	HMGN1P15	EFEMP2	RNF125
	KIAA0319L	RHEB	AL157385.1	SNORD116-29	IFNAR1	AKAP9	TAF12	ZNF189	AL451085.1	DPY19L2P1	ATP6V1G2	ARMCX5-GPRASP2	MRPL51	LARGE-AS1	MRPS24	PTPRC	PCAT5	NUP160	AC005899.2	LINC02398
	OXT	AC008543.5	TSC22D3	RGS11	SMTNL2	AL158071.4	SPATA5	LTB	LILRP2	RNU6-415P	TMEM14C	GLB1L3	AC022973.1	CENPS	DIPK2B	AL355607.2	RPL21P133	SEMA3E	SFRP2	ZNF426-DT
	ST3GAL1P1	RAB5C	LINC01704	AL604028.2	TNNT3	MIR10B	AL136309.2	AC025766.1	VRK2	NFXL1	MFSD14C	SELENOO	AL136310.1	MT2P1	CYP4F24P	AL357134.1	SMAD5	DHRS4L2	PPL	PORCN
	AL391832.2	COLGALT1	RAB7B	TMEM248	GTF3C5	POU5F1	SLC35F5	PROS2P	RN7SL23P	CSNK1A1P1	LINC01554	PCOLCE2	AL451074.1	TSACC	AC019171.1	MCPH1-AS1	AC231759.1	AC025040.2	PLA2G4C	SNAP47-AS1
	AL513523.1	TCF7L2	SGCG	PANO1	AC005586.1	AC006210.2	TEX30	AC092155.1	SCAT1	IL20RB	ITPKB	AC015726.2	RNU6-786P	MCCD1P1	LINC01871	THAP4	SREBF2	DEPDC1	QPCTL	YEATS4
	AC098934.2	TSPAN16	AC026620.1	RNU6-924P	TIA1	SPSB2	ZBTB21	RPL12P12	EMG1	KCNN4	AC138655.1	INHBE	C12orf45	SNX31	C9orf139	AC016394.2	AC099550.1	XIST	ACTBP1	VGLL2
	AC092902.2	NDUFS6	BIN1	ASPM	DDX3X	AC003988.1	SPDYE20P	GFM2	RNU6ATAC17P	PGK1P2	CCKBR	ZNF599	KCNJ8	AC007448.3	AC007193.2	LNP1	ZNF2	AC005342.2	NDUFB2-AS1	AC007683.2
	AC090505.2	AC008040.1	MTHFD2	MIR378J	TCP1P3	RNA5SP452	IQCA1L	CTSW	AL021707.2	OR7E2P	RNU1-19P	ZNF653	PARD3	GOLGA8IP	MIR548I1	GTF2IP13	AC008763.1	KIF1B	GIMAP7	REPS2
	TRMT9B	GLOD4	SNRNP40	HMCES	RN7SL594P	TRBV28	AL355922.1	AC073063.1	TNFAIP2	NDUFA9	NEIL3	FOXP3	ZNF785	C1D	AC098934.3	AL024508.1	PALM3	AL513325.1	AL139041.1	AL157884.3
	SERPINB9P1	PRDX3P4	AC087203.2	AP003117.1	RPL31P49	CHRDL1	AC104066.2	C1orf109	CDH1	IRF2BPL	AC093797.1	RPS27AP16	PRKRA	FCGR2C	AC092117.2	C10orf67	ZFP2	ANKRD31	ENC1	AC242842.1
	FAM118B	CXorf21	SCRN2	NUSAP1	AP001029.2	MAP3K9	AL022328.4	ULK1	EML1	C1QTNF1	SAA1	SNX15	ICAM1	RNPS1P1	GDAP2	AL158829.1	AL133523.1	AL355312.1	AL590282.1	LINC-PINT
	MTA3	AC022973.4	AL139289.2	AP001021.1	MSH6	RAB31	TPBG	BLOC1S1	SAMD8	LANCL3	AC008121.2	ITGAX	AP001646.3	PPM1K-DT	SCAMP4	AC020612.1	PLCB1	AC055720.2	AC136443.4	PSTK
	DYNLRB1	AC097504.2	FPGT	AGAP1-IT1	FAM209B	PPP1R14BP2	AC004846.1	AC068831.1	AC010329.5	EIF3M	ZNF41	AL137067.2	AL358176.1	PARD6A	LINC02145	LMNTD1	RHOB	CCL2	CSPG4P13	AC013391.3
	LDHAL6B	AP001029.3	TUBE1	SMYD3	TRAPPC8	CLYBL	FTH1P16	STIL	NHLRC4	AKT3-IT1	CTDSPL	MEIS1-AS2	DPH6	RNF2	AC021066.1	ZNF408	DDX52	HERC3	BCL2L1	SYDE2
	AC135983.1	SNRPCP16	SMIM2-AS1	TAB1	CPNE1	AC025277.1	GNL3	AL022068.1	LINC00602	TNFRSF10A-AS1	CSKMT	FLII	TM4SF1	AC096887.2	SNORA60	AP001476.2	TMEM43	AL355480.3	AC092042.2	NPM1P47
	PHTF2	BOP1	PROCA1	AL133370.1	AC092747.4	AC068134.3	AC097059.1	RELB	PTPRE	PYROXD1	RPL30P2	ZNF688	AL021391.1	FAM90A25P	RPS10P3	HSD17B13	PPIA	OVCH2	AC096751.2	AC010997.2
	AP001961.1	SMG1P5	AC089999.2	ACOT4	HMGN3	CDCA4P4	AK5	EIF3B	SLC15A2	AC092634.3	CCT4	MIR5692C2	WNK1	FLT4	AC006012.1	POLR2B	ICOSLG	AC084024.1	RNU6-481P	RCBTB1
	EGR2	PLXNA1	RGL1	ZFAND2B	TCF3P1	SNORA66	CPXM2	AC084026.2	RPL10P3	NXT2	SAP30L	DNAJC22	RNU6-531P	AL591516.1	AC021491.2	CYP2G1P	RNU6-888P	AL606517.1	LINC00652	AP001094.1
	FAM234B	AC037459.3	AP001086.1	AC135178.5	TGS1	AL022069.2	NUTM2A-AS1	GCHFR	POLQ	MRPL23	AC068946.1	EEPD1	MTM1	IPO4	NSF	TMEM8A	AC019322.2	BCL2L13	ZNF845	FAM122A
	AC079584.1	ZNF511	AL445465.2	OFD1	SCGB2B2	IL1RL1	NIPSNAP1	MKRN2OS	ZCCHC17	RNY4P25	BMP7	ZEB1-AS1	NHLRC3	GIPC1	AL591806.3	MIR3685	KCTD16	RSPO2	REEP4	AMDHD2
	AC018682.1	AC093227.1	AC053503.2	CDKN2AIPNLP3	ITPRIP	RCBTB2	DLC1	NDUFA10	AC006213.6	PPT2	ACTN4P1	PCSK6	PP2D1	AC111170.2	ZNF415	AC078777.1	AL117190.1	MEA1	ANKRD18A	RPL26L1
	AC019330.1	UOX	ZNF410	GOLGA7	LINC00174	ROPN1L	SFXN3	CNOT1	ZC3H12D	AL162615.1	FASTKD2	AL591806.2	PABPN1	BROX	AC073050.1	HSPA1A	FBXL5	UBE2V2	CPZ	CCDC183
	GTF2IRD2	RING1	AC138207.1	PRR5L	GNG10	AP002518.2	SLC5A2	METTL15	BMPR2	SLIRP	TRIM7	IGDCC4	GEM	RNU6-182P	AC011815.1	GTPBP8	AC008438.2	MIR374B	YBX3P1	NPRL3
	RGS2	AP001208.2	PRKCH	BLVRA	ALX1	RHOA-IT1	BICD2	SHISAL2A	HLA-DQA1	SYT10	MRPL37	CNTN4-AS1	TMPRSS9	SMIM8	SLC27A3	RPL21P89	CAMK2N2	LINC00665	AC009533.2	SLC25A6P4
	LINC01141	CHEK1	EWSR1	HIGD1A	MAP4K5	FAM167B	AL391647.1	AC084398.2	AC010973.1	ZNF578	ANAPC4	AC005021.1	AC011472.2	DDAH1	DNM1P47	CENPS-CORT	NMNAT1	PDE4DIPP1	AC243960.1	KCTD18
	AL136322.1	EFCAB6	AC007686.1	RCCD1	SERTAD4	MOV10	STAMBP	FABP5P14	SPRR2G	RPS23	AL157902.2	NATD1	AC022973.2	MIR548L	LINC02384	AL807757.2	ISY1	MIR5191	AL356512.1	INTS4P1
	LINC00933	TSNAX	ASIP	AL133520.1	ANO8	SMIM10	44258	H3F3A	AC068672.2	SLC25A34-AS1	AL117348.1	AC011008.1	BMP2K	SLC19A3	HSPA6	SEPT7P6	NACC1	EIF4A2P4	KCNJ2	AC112484.2
	GMCL1	LRRC37A15P	GNAS	GHET1	TNC	EXOC8	TMCC1	PIPOX	AC098826.2	AC138028.2	TECPR1	KIF19	RASL10B	ZNF605	AC099343.3	SNRPFP1	ZFHX4-AS1	AP003774.1	TRAJ22	KCNS3
	AL133279.1	HCN4	AC007922.2	PRR14L	DTNBP1	MARS	AC009812.1	AP000238.1	AC097637.1	SLC9C1	AL139260.1	AC027097.1	NME2	RN7SL316P	AC104819.1	DCST1-AS1	LINC01936	AC137932.1	SIRT1	STRADB
	AL021707.7	AL359878.2	PCTP	SRGAP2	CCDC144B	IGHEP2	AP003467.1	NBPF19	AC022182.1	SENP6	PAN3	FAM76A	Z83843.1	AC093525.8	UFC1	AC092681.1	AC105265.1	NDUFA6-DT	PPP1R1B	FZD9
	AC009053.1	TBCD	LINC00294	LACC1	ZNF7	AL035420.1	AL353743.2	AL162430.2	TUT4	XKR6	RAB22A	LGMNP1	PRRT3	AP002495.1	ADAM10	TRIM6-TRIM34	AC087273.2	LINC01429	SPINK13	RF00157
	ECHDC3	HIST1H4PS1	AL008718.2	RAB14	AC243965.2	LINC01366	AL035658.1	WNT5A	GCFC2	AC135721.1	AL158839.1	PPP4R3A	MAGED2	AP002748.4	AP000365.1	AC079305.1	AC025048.2	LGI4	AC092755.2	CEP170P1
	SLC52A3	AC093816.1	SUGT1P2	LINC02001	IFFO2	BTF3L4	CLCNKB	MPHOSPH6	SPRTN	PPFIA2-AS1	FTH1P5	CATIP	CHORDC1	SLC7A15P	SUPV3L1	AC005920.1	RN7SL762P	FNDC8	AC005911.1	U62317.1
	LCN1	NOP14-AS1	RPL12P6	IL17RD	AC068860.1	AC139143.1	AC120042.2	AC015961.1	AC006349.1	EIF2AK1	PET100	MIR6809	SNHG21	AC027117.1	AC087163.3	RPIA	BAIAP2	AC020978.9	NDUFAF6	MTHFS
	SOBP	JAG1	AL137784.1	CCM2L	STAM2	FSCN3	SIRT7	HMGCL	RPL7L1	FLG2	ZNF579	HTR3C2P	FMNL3	SPPL3	AP003392.5	HOXA-AS3	AC021594.1	AC005740.4	RIT1	AC067930.4
	AC104212.2	TM6SF1	GORASP2	CPEB2-DT	AC139887.1	AC005224.3	AL079303.1	AP001630.1	LINC01521	AC004584.3	REM2	Z97192.3	MED17	SLC25A1P5	LBX2	ADAMTSL2	FAM161A	SNORD15B	RPS26P3	TIMM10B
	WDR20	AC004067.1	FAM161B	AL358335.2	MIR4263	UBE2D1	EPSTI1	SPECC1P2	ARHGEF18	ZNF177	CDNF	C2orf16	WDFY2	NR4A3	IGFBP4	NOP2	AL162386.2	AC109630.1	AC005722.3	SYCE2
	HOTTIP	IKZF1	EIF2AK2	WDR33	CYP4V2	MIR4491	MTDH	TREML1	AC131953.1	AL391807.1	AC239798.1	LINC01845	YIPF5	HS3ST1	NXPH2	AL139035.1	UBE2L3	ETFDH	SGMS2	TMEM243
	MIR3122	AP006621.5	CDCA7L	RN7SL567P	LAYN	PAEP	AC103952.1	TMEM147-AS1	NEAT1	TGFB3-AS1	STARD13-AS	RN7SKP16	ACTG1P17	AL032819.2	CICP5	THRAP3	AC243772.3	UBB	PLK2	RNU6-335P
	NKX3-2	RPL26P6	YIPF2	RPS3AP2	AP000859.1	LINC01087	MAGEC3	SPHK1	ARMC10P1	AC025857.2	AC010422.3	AL606760.2	CTSO	KCNA5	C11orf91	SP140	LYPLAL1-AS1	C9orf131	GLTPD2	AC105001.1
	FAM98A	AC139768.1	AC098820.1	LRRC45	FAHD2CP	AC096582.1	AC105074.1	SNX18	SHBG	CYTL1	DAZAP2	ITFG1-AS1	CAMKK2	AC104843.1	MFSD10	PIP5K1B	ZDHHC4	SMCR5	TDO2	RNU6-1156P
	HINT3	CEMIP2	CHI3L2	TP53I11	FRAS1	AC087468.1	CRY1	NSUN7	HYDIN	GABRD	UGCG	ACAP1	HLA-H	FXR1	HBA1	AL358332.1	AL160313.1	PPP4R3B	KIAA1147	ATRN
	IPO9-AS1	MIR579	PLD5	AC005041.1	SCP2	RPL24P8	CYP4F25P	RNU6-132P	PDGFD	INTS6L	TPT1-AS1	AC007998.2	AC055811.4	CHRAC1	RPL24P4	AC020937.1	FMO1	SGK1	C20orf202	CYP2U1
	DICER1	RNU6-828P	ADAMTSL1	AP005131.1	AP001783.1	DHX40	NR2F6	AC010422.1	AC083809.1	TAS2R19	IGFN1	AP003392.3	AUNIP	MTRNR2L12	LINC00243	MTREX	RNU6-7	AC079760.2	RPL21P119	MYCBP2
	RHBDD3	TSKS	PPIAP4	ULK3	ZNF185	HDGFL3	SNPH	AC034195.1	CALCA	LARP1P1	AC004936.1	HES1	CLTB	ELN	SAFB2	KLHL28	AC080013.6	GAL3ST4	TP53	CHAMP1
	AF117829.1	RPL12P35	PATZ1	AL162430.1	AL135999.1	ROCK1P1	AC131281.1	ATP1A2	R3HDM1	CCDC39	PAXX	GSN	SECTM1	TRPC2	SERPINE3	SPATC1L	TMEM131	AC011897.1	A1BG	HOGA1
	HNRNPA1P3	HCG20	TSPAN5	FHL2	AC005013.1	DIRC3-AS1	AL136126.1	AC006445.2	AC005696.1	SNRNP70	NDUFB5	UBXN8	ARHGDIB	WNT7B	NUCKS1	GEMIN8	CENPL	MIR6826	LINC02210	DAAM2
	AC092338.3	Z95327.1	HSPB2-C11orf52	GOLGA8S	AL669970.1	PPWD1	CCL5	AL117335.1	ZNF182	CBLN1	CREG2	WRB	EMC6	AL109976.1	MREG	MPPE1	YEATS2-AS1	C16orf54	SMG7	AC022497.1
	HSF4	MIPEPP1	TRMT112	ZNF888	AL445524.1	ASTN1	PKP3	AC016746.1	PRADC1	AC020934.2	SMO	GOLGA6L7	AC136944.3	CTXN1	MRPS36P2	AC103810.3	LRPAP1	AC005544.1	AC005593.1	SLC39A3
	DHX37	MAST1	VPS37C	AC037487.1	LINC01825	AP006287.1	EID2B	RFXANK	AL022069.1	ITPRID2	AC093523.1	SLC46A1	Z99774.1	EFNB3	FAM86B2	GABRQ	BIRC6-AS2	STK32A	MIR1231	ME2
	ETFBKMT	RN7SKP23	PTPRA	CLEC3B	RF00409	AC023509.2	SLC9C2	AC016644.1	AC133552.2	CTAGE7P	CACNB1	MRFAP1	CTRC	DUSP8P5	CNTNAP3P2	MPPED2-AS1	AC025470.2	AL391845.2	MIR26A1	RN7SL726P
	AC011477.6	AK4	NRK	LY6H	AC022149.1	ASH2L	AHCY	INCENP	HIST1H2AG	MICOS10	LINC01929	WSB2	AC005899.5	AL353708.3	AC008268.1	MAP3K7CL	STX1A	AL355922.2	ZFP91-CNTF	AL512504.1
	RNU6-856P	AC079781.3	DARS	UTP11	SNORA68B	CALHM2	C6orf48	AC003991.2	AC093535.2	AC010385.1	SLC16A1	HCRT	RPL7AP66	CFAP44	ARGLU1	AC073878.1	BEX5	AL122008.4	AL354733.1	AC104590.1
	SUB1P1	RPS3AP14	CZIB	AC004223.2	STK39	TRAJ11	DSTNP1	R3HCC1L	SLC22A15	AC107982.1	CLDN14	NF2	PLD2	USP35	PICART1	MIR5091	MGST2	AC004223.3	AC008946.1	AC114296.1
	CALCR	ZPLD1	HMGA1P4	AL592430.1	SLC23A2	GTPBP1	AP001486.2	AC093890.1	LRRC20	AL031186.1	AL512274.1	PGM2	ATN1	ZNF729	ZNF204P	RPS4XP16	ZNF786	SLC2A6	MIR550A2	TRAPPC6A
	ARF4	ZNF32-AS2	AC053503.5	FAM136A	APP	VN1R87P	AC124856.1	HIST1H2BK	UBE2L6	CLK2	ABL2	AC005776.2	AC004895.1	LINC01862	TVP23A	AC124784.1	LTBR	MT1L	WNT2	C6orf106
	OCLNP1	MCFD2P1	AC005005.2	AC104237.1	AC018889.1	AC091588.1	PHF10	N4BP2L1	AC040160.1	CDC42BPG	SNORD48	SLC5A3	AL121944.1	PMS2CL	AL157395.1	HBA2	RPS3P2	CDX1	FBXO25	AC006272.1
	AC011477.5	BACE1-AS	ZC2HC1A	SLC2A12	RPS15AP10	SULF1	NADSYN1	HYDIN2	AC091826.2	RN7SL809P	AL359273.1	LINC00520	AL390774.2	RBP4	DDX49	AC010247.2	AP003306.2	AL049781.1	AC087289.6	FER
	HELLPAR	ATP7A	AC105389.2	AC103982.1	AF064860.2	AC110373.1	UGP2	FUBP3	RN7SL803P	TMCC2	UXT-AS1	IQCC	TRAF1	AC011451.1	RNFT1	TAS2R20	SARDH	DNAJA1	ZNF440	TMEM101
	DYM	NIPAL3	AL078644.2	E2F7	PHF5A	CILP2	UBE3C	RPS24P7	ANXA6	AL392003.2	AC007365.2	OIT3	AC068790.8	CHRFAM7A	AP001094.2	IGLVIVOR22-2	AC092376.1	AL135818.2	UNGP3	OIP5
	NAA15	AC233723.1	MIR3146	WDR35	AL162311.2	SLC9A6	AC017002.1	LINC01714	RASEF	RNU6-1238P	WIPI2	SLC29A4	KDM1A	RF01210	PNPLA4	ACTG1P19	AC114744.1	RANGRF	CD79B	BAG5
	SLAMF6	TLR7	GRXCR2	EXOC7	PLAG1	RTN4RL1	NAP1L1	ZNF33B	TMPRSS13	LIFR-AS1	SERPINB2	RPL22P3	AC016526.3	AC087477.6	AC040934.1	AL133153.2	AP005899.1	ACP4	FAM49A	AL365194.1
	AC008686.1	AC104058.1	AC019084.1	TBC1D14	MTTP	AC024267.6	AP001324.2	RNA5SP101	STXBP2	AL445472.1	RPL7AP6	SLC39A12	RPL35P5	AC012377.1	AF127577.6	AC026704.1	USP17L7	PITPNA-AS1	AC097376.1	CCDC163
	BEGAIN	SLC51A	ZDHHC3	AC012254.3	FNTB	AC119800.1	AL390243.1	SVBP	AL096869.1	AL445991.1	UROD	LINC01145	TLE1P1	ARHGAP24	CBFA2T3	AL356776.1	TNK1	LIMCH1	ZNF639	RNU6-323P
	DEPDC1B	AL603832.1	RPL4	SNTB2	AC006946.1	DHRS4	AC103858.2	SLC29A1	GPBAR1	PFKL	AC079921.1	GAS5	FCHO2	POLR2M	TRPC3	NUP35	SNURF	NOS2	MEIOC	TAF11
	CNNM3-DT	AL359317.1	CU633967.1	AC005154.1	AC008750.5	RPL13AP6	SLC25A14P1	LINC00398	CA15P1	AC006504.4	LINC01303	RN7SL356P	AC019163.1	SIK1B	AC134698.4	AL023583.1	RCN1	SNORD53B	44263	NPIPA9
	FYTTD1P1	MUC20-OT1	NPM1	ERI1	RNU7-71P	AC073346.2	MTHFD1P1	EXO5	RHOH	RTCB	TATDN2P2	DPY19L3	AC090281.1	RPSAP41	ARHGEF5	COX6CP10	AC090877.2	AL136172.1	AC103794.1	WFDC13
	B9D1	ZNF826P	STAG3L4	ZG16B	DGCR8	ATP6V0C	RASA2	AC126773.3	LINC00987	AL161757.2	AC005479.1	LINC01587	RPL7AP65	IMPACT	AL049539.1	TNXB	AC106712.1	PRSS46P	AP003789.1	HTR5BP
	AC079336.7	AC106782.6	ACSF3	GSTA2	AC053527.1	ATP6V1B2	TEX264	TRAPPC11	SAP30BP	TMLHE	ZNF781	TNFRSF19	AC023968.2	NPHP3-ACAD11	LINC00940	AC096992.2	TCF21	AC012645.3	IGHG4	TMEM259
	ATP1A4	FAT2	AL353803.3	DDRGK1	AC079949.2	TNFRSF14	SPATA8	AC110285.2	AL035071.2	PPTC7	SWAP70	ATMIN	AC011753.3	CABIN1	LINC00240	RNU6-341P	AC018638.3	WNT6	AC005722.1	CUTA
	AL356488.3	C3orf14	C5orf34	RPSAP65	LRRC23	FTLP17	RNU6-884P	AL353596.1	MIR580	FALEC	ZC3H10	WFDC21P	LINC02043	AL138847.1	ADAD2	RNU2-11P	RPL17	RNU6-19P	SKIV2L	TPM3P3
	MIR4639	FCAR	MDFIC	ATP6AP2	AC073861.1	AL136981.2	AC002094.5	RNU7-84P	HIST4H4	ANAPC15	AC068672.3	PTPMT1	HINFP	ITIH3	TRIM68	AC010332.1	MIR627	LINC00603	FTH1P23	TSPAN9
	STRADA	AC016954.1	MEGF9	U2AF2	AC145422.1	TRIB1	TNFRSF25	MASP2	COQ5	NAA16	AP001029.1	AC021146.12	KYAT1	AC090912.2	RPL15P21	MFAP1	AC120114.4	PALM2	SUCNR1	AL139125.1
	C9orf24	AC005332.3	ZNF230	ZNF395	GAL	AC026310.2	UPP1	AC106739.1	AC012464.1	ENAH	AL445985.1	PTK2B	TFF3	AC012676.3	CRK	ZC3HAV1L	ULK4P2	AC011443.1	MAMDC4	SLC22A18
	AC093752.1	PRMT7	LINC00641	AC018816.2	AC078850.1	BRD4	UPK3BP1	MTSS1	AC020913.2	PRDM11	AP000873.3	SRRM1P3	SRPRA	AL391883.1	BIRC2	HCG17	CCDC84	AC008250.1	IL7	FKBP3
	POTEJ	DFFBP1	MAP2K4	MORF4L2	RPLP1	ZBTB44	UBE2Q1	AL591770.1	MED16	FAM96AP2	COL11A1	TRAJ19	CNN2P9	ZNF524	ANKRD46	AC001226.1	KIAA0355	TCTA	AL589743.1	NT5CP2
	AC079168.1	IPO8P1	AC121161.2	PRSS53	AC244453.2	AC099568.2	AC104117.1	CPNE7	PIR	PHBP12	AC015813.7	CEBPG	LINC01003	UBE2Z	SMC5-AS1	AC025580.3	ACADL	AL049795.1	RNA5SP357	BRAT1
	IGFBP2	SPECC1L	AL592490.1	AC092162.2	ZNF8	SPACA6P-AS	PACERR	MFHAS1	AC027627.1	ZNF506	RNU6-1289P	RETREG3	ZBTB48	B4GALT1	SART3	GTF2H2B	DEF8	LRRC66	TRMT61B	AC027290.2
	AC084759.2	RPL29P24	FCN1	WDR54	C1orf52	AP002340.1	AC087879.1	MYCBP2-AS2	LMBR1L	SLC8A2	ASLP1	PFKFB3	BUB1	SAV1	AC018647.1	SNHG8	NFE2	IPO11	SS18L1	AC002456.1
	AC104794.4	AP003485.2	MSNP1	P4HA3	AL451050.2	BTN2A1	PTP4A3	BLZF2P	RNU6-188P	CACTIN	RALBP1	AL672142.1	CXCL5	AC090409.1	ZNF322	GHITM	AC106886.1	AL365203.2	HS3ST2	HK1
	MAP3K1	AC010536.2	PDIA3P2	XYLB	ZNF684	AC022400.8	LINC01632	GYPE	AL161725.2	AC073548.1	BTBD10	TRERF1	P2RY12	AC110285.7	MCEMP1	LINC01353	AL354892.1	AQP4	AGK	IBA57-DT
	GIPC2	TPP1	LYZ	AL392172.1	DZANK1	EIF3KP1	PEBP1P2	SPATA24	RNU6-87P	IL2RB	C19orf33	RSU1	TGFBR2	SMAD2	MIR4733	MOXD1	AC092159.3	KCNA1	AURKAP1	GRM7-AS1
	LSM14A	AC006213.2	NUDCD3	SLC25A53	MIR378A	AC087362.2	SEC23B	RHOT1P1	RPS15AP1	GPT2	AC046158.3	RNU6-100P	HSD17B10	OGFR-AS1	SPECC1L-ADORA2A	AC108067.1	AC015795.1	AL049873.1	AC010323.1	ATOH8
	RPL29P19	AC083805.2	BUB1B	PLLP	AC011330.2	TMED8	RF00105	RPS26P31	OLFML1	MYLKP1	CLEC14A	AC005037.1	C2CD2L	ZNF234	SPATA13-AS1	ZNF473	ARHGEF35	LINC01879	AC156455.1	ETHE1
	SMC2	IL15	HRCT1	HSPA8P19	DGKE	PRAF2	XPOT	RRM2B	DHX15	LINC01374	VPS28	LYST	CIDEB	ARHGEF15	CENPX	FAH	INSL6	CKAP2P1	RPL7AP64	RPS15AP17
	SNORD93	CHL1	AL137026.1	AC069431.2	SNAP23	GPR82	AC091544.1	AC083799.1	SERF1B	ZNF512	NPIPB4	AC005703.4	NPIPB8	RNU4-6P	RNA5SP465	SLC3A2	PIP5K1P1	RIPOR1	AL158062.1	GALK2
	AC009229.2	AC008147.2	VN1R48P	SYT7	SERPING1	AC005264.1	AP003465.1	CASP7	AP000280.1	LYRM9	AANAT	PMAIP1	DNM1P32	ZNF765	IBA57	AGTR1	COX8C	TEFM	ARRDC2	AC012360.3
	RTN4	LINC02334	FBL	LINC00909	ARHGAP5-AS1	AC100803.3	SIRT6	DNM1P46	C1orf122	AC069549.1	SEMA6A	SLC9A8	BANF1	AC009065.8	HSPE1P21	AL353804.2	AC021739.5	AC096553.1	PHACTR2	LINC01422
	CACNB4	GLS	MPV17	SEMA6A-AS2	TMEM231	RNA5SP498	HIST2H2BA	SIRPB1	MIR548V	AC004707.1	PLEK	DEGS1	MSL1	KLRB1	F8	AC009974.1	LINC01016	AC108734.3	AC016251.1	IL17D
	AC007751.1	MKRN5P	PABPC1P7	TRMT61A	AC008677.2	CPSF4	EFNA1	SAG	AC139453.2	CCDC168	RNA5SP120	CIC	ANKRD39	AC020908.1	RTEL1P1	AC021231.1	AC064853.1	PLSCR3	AC129507.1	STARD4-AS1
	GOLGA6L3	AC007920.1	LINC01433	RN7SKP118	PLPP5	AC010735.2	RPL30	CFAP58-DT	AC026271.1	AC073534.2	AC007040.1	PIGBOS1	SAP30	SHMT1P1	ZNHIT3	AC092168.2	AC008543.3	CACNA1C-AS3	MIR101-1	ATP5MG
	RN7SKP240	RN7SL845P	AP003108.2	ZNF334	AC087276.1	ZNF131	SOX17	HNRNPCP2	AC004889.1	SLC44A5	CEACAM3	AC007952.4	ZFP69B	AC012358.1	LILRP1	PNMA1	LRP6	AL158827.1	FTH1P20	AC104333.2
	ACAA2	ARL6	PLA2G7	SPG7	AC010469.1	ZNF141	MSX2	SCML1	RPE	AP001042.1	AC010487.1	AC005387.2	AC245100.6	ABCA6	BASP1	AC112694.1	AP000255.1	LBHD1	GPR119	AC091114.1
	SMC5	SOCS6	CALM2	SRSF10	C11orf74	FOXC2-AS1	RPL7P38	COA7	RNPEPL1	P2RY6	TBCA	PPARD	AL445183.2	AC099066.2	AC129492.5	DNAAF3	DNAJC5	CUTC	SNORD127	AC003682.1
	RBPMS2	BTBD16	AC005091.1	RBM3	AL162385.2	CFL1P3	LINC01197	SLAMF9	FAM173A	GGACT	ZKSCAN5	PARP9	AL034417.2	ATXN10	GTF2E1	DGLUCY	AC020917.1	MIR1270	ODF3L2	ZNF771
	AC104806.1	NRTN	AC013290.1	WDR91	CLEC10A	AC018463.1	CFLAR-AS1	BNIP3P24	AC004687.1	TRIM28	VNN3	AC135050.2	AC005005.1	FAM183DP	AC061975.5	AC073912.2	STAT3	MIR125B1	HIST3H2A	AC027309.1
	AC004253.1	CCNB1IP1P2	RNU11-6P	KDM5C	AC079250.1	AL157935.2	SLC26A10	PKP4	HMGB1	SLC35B4	ADAR	SPATA2	SLC7A7	TDH	MRPL52	AC024901.1	ARSJ	CASC23	SNX29P2	PABPC5-AS1
	RCAN1	NAGPA	AL669983.1	EXOC1L	HAMP	INVS	ARRDC5	MIR4429	AC019077.1	RAB27B	PLEKHH2	AC127024.2	AC244517.8	AC091153.1	RHBDF1	LINC00922	RNU6-890P	AC092692.1	RHEBP1	FAU
	MTND1P11	AC010463.3	EIF1P5	RNU6-930P	AL008638.6	AL845552.2	LINC02601	MTCO1P2	NXNP1	PCDHGA1	MEAF6	AL645941.1	MANEA	AC011742.2	AC084782.2	RNU6-1331P	TRAJ35	PDZK1IP1	MAN1B1-DT	AC096582.2
	ETF1P1	GNG11	POLR3E	CD34	CYP26B1	LINC00870	CBR3-AS1	GOLGA7B	AL021937.1	CC2D1B	AC124276.1	AC004854.2	H2AFJ	MED23	MT1E	AC005410.1	AL031229.1	INKA1	PSPC1-AS2	AC114491.1
	HTR7P1	AC079467.1	IFFO1	LIN54	UBE2S	AL158152.1	A2MP1	MLXIPL	AC092287.1	ARL6IP4	NFYC	NAAA	OR7E126P	AC092159.4	APC	RN7SL403P	RFPL1S	AL390755.1	CENPV	PAQR6
	OR9A2	RAB38	AL022328.3	BABAM1	VPS53	AC055876.1	APOPT1	MTX1P1	GSTA1	MICOS13	STEAP4	AL391825.1	SAMD4A	RN7SL629P	RNA5SP217	CTF1	TBC1D2	AC103681.2	KRT18P34	DHRS11
	LINC01920	FITM2	RN7SL649P	OAZ2	LINC01124	CCT8L1P	CIAPIN1P	CHKB	AC026124.1	FOXO6	GADD45B	RUBCNL	FXR2	MIR3613	AC008878.3	PPP1R15A	AC007991.3	AC079753.1	INHBB	IMP4
	CSNK1G2	HMGB1P14	AC020718.1	HOXD13	AL022322.1	MTMR7	MIR5685	PTGDR2	AC244153.1	TMEM45A	RPS7P1	AC008745.1	AC093835.1	MYL3	RABEP1	SEPT14P8	FRG1KP	AC019080.5	AL136301.1	CDK13
	ALOX12P1	ALG1	MAPK1	AL096870.2	AC026367.3	GUSB	C6orf136	DHX30	AC004951.1	AL031598.1	RF00334	AC027277.2	FAM242A	AC015813.1	BORCS6	OSBPL10-AS1	AC091925.1	DPRXP4	CASD1	NPM1P37
	AC109479.1	AC020911.2	ABHD11	AC008610.1	LINC02461	AC079322.1	SLCO4A1	ZNF625-ZNF20	ZNF544	Z83820.1	Z98885.1	AC106028.4	FAM27C	AC021146.11	AL355073.1	AC006128.1	RGS17	EFTUD2	BX649632.1	ENPP7P2
	AL390726.5	AC004023.1	AL031674.1	EMC1-AS1	UBE2D3P2	GOLGA8F	FBLIM1	EIF5AP4	AL050341.1	YWHAZP6	AC012313.3	ARMC2	SKA2P1	RNU6-1339P	SLC25A17	CPD	ACO2	AC018695.6	FSCN2	PKIA
	MTND4P29	CEBPD	LINC01558	TDRD3	ZNF671	AP001469.3	ELMSAN1	AP000941.1	CASC18	CD48	AC006116.4	TBC1D7	TUBA4A	LPCAT2	PCSK4	TNIK	KLRA1P	ELOA	USP46	JUP
	MMUT	LINC02468	AL356481.3	OTUD3	HMGB1P49	TAB3P1	DDX24	IFI44	AL591719.2	STRA6	SMPD4	LYPD8	AC091805.1	MIR4261	TMEM116	AC068792.1	AC006329.1	AC010761.4	RPRML	FZD8
	ADAMTS16	RNU6-1209P	CD177	HEYL	AC005162.3	GCSHP4	AC064836.3	MIR570	NBR2	AC103974.1	AL441964.1	AC048382.5	TRIP11	ING3	AC005523.1	CPEB1-AS1	CLNS1A	KIRREL3	ETNK2	H2AFZP1
	AC002398.2	PPBP	MRPS36P5	AC103770.1	BX005019.1	AC025279.1	PDZD11	COX8A	NDUFB1P2	SOX30	AC009090.3	MTND6P22	YBX1	ANXA2P1	CEP152	CHURC1	LINC00528	MIR5008	MAGEF1	AL136164.3
	AC027097.2	SEPT7	TUBB8P2	TRAM2	C20orf78	AC013472.3	AC009102.3	ADRA2A	PDPR	NPY1R	MMP13	SURF2	RNU6-431P	XPO6	AC073342.1	AC008728.1	RPS7P4	AC010368.1	LINC01707	C4BPA
	SHQ1	CORO7-PAM16	MIR558	TRAV39	ETV3L	OLFML2A	BCKDK	AC083849.1	PITX2	ZBTB33	LINC01270	ARHGAP10	PMS2P7	SNORA71B	MFGE8	AL731892.1	RN7SL570P	SCRIB	C17orf64	RGPD8
	CCNE1	MDK	PPIAP37	NFE2L2	SNIP1	AC011632.1	UHRF2	TMSB10P2	GYG2P1	AC243547.3	AL590705.1	HCFC1-AS1	SCARF2	AC090607.3	NRARP	MIR6508	TIMM44	AC008760.2	AC134669.1	AC011447.6
	BX679664.3	ZNF98	RPL21P16	AC093864.1	AC021106.2	AL031055.1	RNF219	AC127024.5	STEAP3	RPL17P34	AP006289.1	AC087672.2	ZBED9	PPP2R3A	AC074194.1	AC092159.2	AC116347.1	AL807757.1	FANCA	AC073150.1
	AP001107.8	LINC02340	BX571846.1	AL132656.2	AL021408.1	PCSK5	PMF1	AC010531.5	AC073349.1	BCL2L11	GART	DNAJC4	PLA2G12A	DLL1	LINC02332	HR	SH3GL3	SLC6A8	WWP2	AC124861.1
	AC079150.1	AARS	SF3B3	RNU6-1281P	AC074143.1	AC105420.1	CCDC74A	MIR4674	AC104763.1	PRCD	SF1	ELOVL1	AL137796.1	LINC01705	MIR548AA2	AL606534.1	AL031663.2	CNTNAP2	AC018511.1	AC024579.1
	AC093010.3	CCDC69	AC138904.1	RFT1	CHEK2	ZBTB12BP	AP001269.2	AC099811.3	SEC24C	CU633906.1	MIR23B	AC024270.4	NUDT9P1	BRI3P1	IL24	AL591926.4	BAK1P2	PTGES3P3	ZAR1L	PDCD10
	ATP6V1B1	AC007365.1	LINC01752	LARP6	FAM133DP	DSG2	AL031283.3	RNA5SP511	AL355001.1	LINC01121	SEC14L5	MIR3197	PCOLCE-AS1	CNOT7	OR2H2	AC016027.5	S100P	RPS4XP11	AC096751.1	MRPL2
	CAPN3	LINC01229	LINC01301	ZFP3	AC093627.7	AC016999.1	AP002812.2	AC012181.1	AC092747.1	PRPF4B	AC017076.1	STK11IP	RNU6-623P	ARHGAP42P1	AL445248.1	AL354726.1	MAST4	KCTD9P6	EIF4EP2	ERI3
	AL022718.1	AFG1L	C16orf92	SYNGR2	AC092115.3	AL161787.1	PPCS	FAM149B1	HAT1	AC023302.1	AL139100.1	GNRH1	AC006504.8	OR10AB1P	AC025175.1	LINC01731	SNORA58B	LOXL1-AS1	TIPARP	GEMIN6
	AL603650.1	ARID3B	RN7SKP195	AL158211.5	LINC02609	AC008737.2	XPR1	PRRG2	RBM27	CD3E	UQCRHP1	POU3F2	RPL22P21	PLAGL1	AAGAB	LRCH2	PDYN-AS1	FBXO45	CHURC1-FNTB	PAX9
	AC013731.1	RPS10P2	RNF170	E4F1	AC011944.2	SNORA5C	F12	PRICKLE2-AS2	ABCA10	LINC02015	AC004832.4	SNRPGP9	ZP1	AL031713.1	CCDC180	TMEM38A	CD247	AC120498.6	FOXF2	AL513329.1
	RPL22P12	AC112715.1	AC092849.1	AL031595.1	MIR8073	AC137695.1	AC104985.3	GANAB	GZMH	ADM5	CCDC178	AL589843.2	AL132642.2	AC008406.3	STIM2-AS1	RMDN3	AC112198.1	OR5AH1P	CYP11A1	EDRF1-DT
	EIF1B	LRRC47	VPS36	AC005261.2	MIR3199-1	RNA5SP123	HLA-L	ZNF668	CDKN2A-DT	SATL1	SCUBE2	THEM6	AC073878.2	RNU6-403P	ATP5F1B	RTN4RL2	MCM3	CPSF2	PLEKHA3P1	AL445250.1
	AC087477.2	FDCSP	SCP2D1	OTULINL	AC139103.1	LEPROT	RN7SL154P	ST3GAL5-AS1	AC027279.4	GBP2	AKAP7	ZRSR2P1	RPS19P1	MAP3K14	DPH6-DT	AC010900.2	AC010632.2	C16orf58	LY6G5B	SLC2A4
	RNU6-917P	DLG2	AC087203.1	AC022710.1	AC024937.2	ZNF587	ATP5F1EP2	AC006566.1	DMXL2	PRAM1	MKRN3	TMEM89	BNIP3P39	CLCA3P	HAX1	RBPJ	AL591767.1	GJA9	NUTM2B-AS1	LINC00460
	ZNF135	AC025048.6	AP000763.2	RF00012	AC159540.2	SORCS2	ZNF460	IGFLR1	AC009113.1	CTH	ZNF207	AC073592.8	GAPDHP67	CEP41	NUP188	LINC02052	PITPNB	MTRR	NAPSB	LAMTOR5-AS1
	ERG	AC093159.1	LINC00934	AL445222.1	RAD23A	AC090673.1	ZNF704	PTMS	AP001024.1	AC137630.3	AC005845.1	LINC00664	AC113404.1	SNRK	SARS	BAZ2A	HDHD2	ANKRD11	AL021707.5	CAMTA1
	DPF3	AC013724.1	SMILR	RNU1-84P	AC025262.2	LINC01323	ACBD7	CKAP2L	MAP3K20-AS1	CD2	AC093525.2	AL450124.1	PAIP2B	SLC16A13	AC011247.1	AC005519.1	KCTD5	AP2M1	NUDT16P1	NSL1
	AL353795.3	ADAMTS7P4	AC073343.1	MIR6739	AC018797.1	AC113378.1	MIR548A3	SIAH2-AS1	INTS6	AC005154.2	STK36	RN7SL263P	AL359233.1	NARF	AL391427.1	RNF185	MRPS5	AC087499.3	ZFP1	CORO1C
	ARRDC4	FTH1P8	ATP6V1E1P1	AC016831.6	FKBP8	CBX1P2	RAC3	AL078621.3	BTRC	CBR4	MAPKAPK2	CEP72	RRP7BP	POFUT2	TMEM191A	ACSM3	AL451070.1	JRKL	ZNF260	EML2
	AC010320.3	PODXL	AC004801.6	AC090103.1	TRAJ23	GFPT1	AC091965.5	LINC01435	AC055822.1	PCDH17	AC087222.1	AC104655.1	CCDC127	KIF3B	AP001178.2	C3orf86	LINC02547	CCDC97	PUM1	ADAM19
	STX2	LINC00921	PIGX	SNAPC5	ZNF451	PMS2P6	AC091588.3	RNA5SP155	LINC00691	AGAP5	ANK3	DNAJB7	LYPD1	PPEF1-AS1	PDAP1	UBQLN2	TXK	NT5C	UPK1A-AS1	AC044802.2
	PNPO	ERFE	FP565260.6	NREP	APCDD1L	RPL14	LHX6	C12orf76	KLF3-AS1	UBN1	AC019206.1	TREML3P	AC005837.3	ST13P5	RNU6-1225P	ADAMTS5	PRXL2A	LAIR2	AL442071.1	TYRO3P
	KCTD19	SNN	GLS2	TMX2	FLT3LG	COX7A1	PEMT	SNORD37	AL121890.4	AC004816.1	CHMP3	ANAPC5	RPL15	PIP5K1C	LINC00342	AL512593.1	DSEL	CATSPERB	RF00438	RN7SL144P
	HSPB1P1	AC142381.3	AL845472.1	AC117382.2	AC021205.3	IQCH-AS1	MYO10	PRSS44	AC112250.2	GALNT13	HTRA4	PSMA6P3	FAM47E-STBD1	AC112778.1	SLITRK3	ADM	KDM4B	INO80E	HERC2P2	MIR4512
	AHR	ZNF84	AC008056.1	AC016405.2	AC104777.2	LINC02471	HYI-AS1	SLC13A3	SNAPC2	TEX41	MOCS2	C20orf141	RPSAP44	LCK	RRN3P1	DBH-AS1	MTMR14	SEC22B4P	UBE3D	PANX2
	H3F3AP4	GLRB	AP000347.1	B2M	STEAP1B	FTH1P11	AC087481.3	NQO2	AC087235.1	DNAJC16	ENTPD3	AP003499.2	ZBTB47	MTND2P28	AC104785.1	MMP2-AS1	UAP1	AC093909.1	SLC25A21	MRPL32
	AL034428.1	IPO7	AL136295.4	STMN4	MIR1255B2	AL135925.1	SCARA5	LCA5L	IL7R	VENTXP6	KANSL3	INSIG2	STXBP5-AS1	AP000879.2	AC132219.1	OR10V2P	NAPEPLD	MT1H	AC113143.1	SFXN4
	SNORD60	ZHX1-C8orf76	AC108865.1	AC007000.1	ILDR2	AC087521.2	LINC01776	KATNBL1	AF230666.1	MAIP1	AL162424.1	AC097468.3	C4A	AC027796.3	MIR3157	AL157791.1	AC117503.3	RACGAP1	C2CD5	NUP98
	AL359881.3	CHRD	TCTE3	AC108058.1	RASIP1	CCDC43	CNFN	AL132838.1	AC090531.1	SLC4A5	GJA8	SEMA5A	PTK7	RAPH1	AC026801.1	DUSP7	CYTH2	ZGLP1	YEATS2	ALOX15B
	ERG28	AC011495.1	UAP1L1	AC008591.1	SULT1C4	AL365434.2	POLR2KP1	RAB1B	WDR5	AP003733.4	CCDC124	WDR27	TMEM33	AC044787.1	RABL2A	IDH1-AS1	DALRD3	AC131902.3	LINC00618	DAG1
	DLG4	CERS3	PDCD11	HYAL3	AL358334.2	RPS3AP38	GRAMD2A	EPB41L3	CMIP	MIRLET7A1HG	HPCA	PCCA-AS1	PPM1D	NCLP1	E2F8	ZIC4	MIR770	AC005160.1	ANP32AP1	WRAP73
	SNORA70B	B3GALT1	CES3	HIGD1AP14	AL031846.1	AL445670.1	LINC02620	TCP11L1	LINC02236	AL512422.1	PSMB8	TIMM50	AC068533.4	RN7SKP136	IRX3	AL451007.1	OTUD4	LINC01563	SNX18P3	ZNF154
	NCEH1	HNRNPA1P21	SF3A1	MIR4804	MVK	THBS3	CCDC184	MTCYBP2	YES1P1	PDCD2L	HCG11	ITPKB-AS1	MAGOHB	CARNMT1	SYDE1	AL161937.1	GABRE	TRMO	AC008063.2	STAT6
	AL158834.2	TACR1	AL138752.1	AC022784.5	DESI2	PLAA	MIR4636	FBXW12	RBMX2P3	TINAGL1	SLPI	CRELD1	DLGAP4-AS1	TMEM241	KCNU1	CCDC59	TAF9BP1	PRSS45	WDR45	DLEU7
	FDXACB1	AC108482.1	NTHL1	TPT1P8	GCC2	EDC3	HSPH1	NAV2-AS2	AL390955.1	AF111167.2	LRRC75A	AP001453.3	AC084781.1	SYTL3	FAM124B	AC103808.4	AL121603.2	PPP1R13L	AL662907.2	AL049776.1
	ECH1	MAN2C1	CACNG4	JPH4	ANKRD30BL	AC015712.2	SRP19	AC103808.2	ABCA9	AC008735.1	TBC1D8B	RN7SL49P	CNTNAP1	AC010096.1	RPL31P20	VEGFD	TM9SF2	AL133373.1	TMEM143	AC128687.1
	THTPA	KCMF1	FUT8	AC008764.8	KCNC3	DTX2	AL390728.6	MTAPP2	GTF2IRD2B	RNF144B	MBTPS1	ATP5MFP4	EEF1B2P2	GTF2IRD1P1	AC100861.1	CCDC106	PYCARD-AS1	RN7SL69P	ARHGAP15	AL354836.1
	AP001318.2	EEF1A1	LEF1-AS1	AC012146.3	PSME2P2	LRRC3C	AP002982.1	RN7SL418P	SLC22A4	AC002985.1	DOCK5	ZNF83	DTD2	AL354692.1	BX322234.2	AP003108.1	AC127526.2	CERS1	TIGD2	AL627309.1
	AC004754.1	LINC00672	AC112907.1	RN7SL306P	ARL4D	FTLP15	TNFSF14	BRCA2	CCNH	AC007881.3	AC007613.1	TMEM127	PI16	AC012213.4	MIR6757	DAP	LINC01048	GRK5-IT1	AC079298.2	AC090125.1
	CNKSR3	AP003390.1	LINC02021	ME3	MARK3	CRYBG1	RNA5SP154	AL162274.2	AC136424.1	PARP11	TMEM169	RNU6-1099P	HELLS	KDM2A	AK8	ZNF280A	AC008481.3	RPAP2	AC025181.2	PI3
	PER3	AC010551.2	PIK3C2G	AC104031.1	ELF3-AS1	AC004453.1	SPICE1	HSPE1P14	RAP1GAP2	WNT2B	SRGAP2B	AC097478.4	RNU6-484P	SRSF9P1	AC107373.1	NPDC1	ZNF66	MXRA7	LINC01956	NDUFV2
	RPL10AP6	CLIC4P3	AC068722.1	KIAA1841	SCG5	TBC1D25	ZNF75D	CHPT1	GIGYF2	AC243654.1	NCR3	ZNF175	CD36	PAGR1	NTRK3	SERP2	KIR2DL4	COMP	LINC00320	SAMMSON
	AC025287.2	TMEM92	STX17-AS1	AC090587.2	TPI1P4	AL442663.4	CDKN2A	HECW2	LINC01524	ANKRD19P	GAS7	AC068724.1	AC023794.6	C1QBPP2	AC002558.2	TTC23L	CDC34	TRBV7-3	AC034236.1	SIRT3
	AC078899.5	ZNRF2	FTH1P4	LINC01764	AC063944.2	ULK4	XCL2	SLC25A5	RBM15-AS1	ARMH1	AC090559.1	GIHCG	AC005291.1	TBP	NAPB	LINC02139	AC025569.1	AC000067.1	EVI5	JAM3
	FAM207A	AL139349.1	NEK4P1	AC108748.1	SLA2	XKR3	HPSE	AC009869.1	AC004825.2	NKX3-1	CCAT2	AC007879.1	AC073071.1	DRG1	AC009630.1	AL161658.1	IGLC7	ADGRL3-AS1	CEP57L1	LINC00877
	PRR19	ACTG1P16	ATP1B3	ETS2	RPL37P2	AP006565.1	AC108134.2	DPF1	AP000688.1	VASP	AL603839.3	ANKRD16	PLAT	FAM220CP	AL121956.1	AC022211.2	ABHD14B	MYCBP	BDNF-AS	RNU6-354P
	AC004951.3	PDE12	ZSCAN26	FAM222A	USP2	RF02275	C11orf49	GRPEL2	NDUFA12	YARS	AP001646.1	LINC00656	LINC01142	AL035425.1	TARS	CNNM3	SERINC4	NEK3	TFR2	ZP3
	CASC10	MYO16	AL513314.2	AL158850.1	ANKRD10	RRNAD1	AC128687.2	ST13P4	AC005786.4	MTND2P30	AC234781.2	AL354702.1	RPL12P17	P4HA2-AS1	SNORD116-30	TUFT1	AC092718.4	AF165147.1	AC245052.5	HLA-G
	C5orf67	NBPF15	KCNE1	AC068669.1	NMRK1	AC073957.1	FAM107B	AIG1P1	AC067852.2	AL158835.1	ITGBL1	GAP43	AC016876.3	C22orf46	IGFBP7-AS1	UBTD2	AL022394.1	AL355355.2	AL365181.3	YWHAB
	WDR93	AC019294.2	AL627309.7	SCNM1	AC008735.2	ENOX2	AC091057.3	IRS2	KRT18P57	PRKG1-AS1	PPP1R21	AL158071.3	LDHD	LINC00427	HSP90AB1	ST3GAL6-AS1	MKNK1	RAB42	AL117344.1	AC006483.1
	AC026401.2	KLHL33	ERICH6B	BMS1P4	AC007750.1	AC022441.1	TNK2	CYP46A1	LINC01698	ITGB2-AS1	SMYD5	AC079949.1	AC024619.3	AC115285.1	AC092667.1	ZNF812P	AP003498.1	HSPB1P2	AC005828.4	AC018521.7
	METTL21C	AC018638.5	ZNF335	AXIN1	AC024587.2	IFITM9P	HMGB1P12	LINC00332	ZACN	AC108673.2	DCTN2	TMEM132B	RPL10P13	EIF4EBP2	RPL7P8	AL122125.1	GJA5	AC139272.1	EEF1AKMT1	RPL7P6
	VN1R85P	AC018620.1	LINC02242	FAM81A	LPA	KBTBD7	KANK4	SMIM17	LINC00847	IFNA20P	NUFIP2	AC233728.1	LINC02610	GPR141	HAUS6P3	AP000695.1	CTBP2P8	DHDH	TRBV8-2	SPINT5P
	AL392023.2	ABTB1	POLR3G	YTHDF1	ASCL5	LPAL2	METTL8	AC010132.4	APOC4-APOC2	AC092045.1	TMEM182	NCAPD2	AC068867.1	APOD	AL355852.1	FAM242F	TUBA4B	LY6K	SLC4A8	PNMA8B
	RPS7P12	OXSM	KANK3	ZIM2	AL356273.3	BNC2-AS1	AC110597.1	AL353593.3	KRT222	RPL9P18	PIDD1	PDE1B	PINK1-AS	AC079610.1	AF181450.1	MCM4	ZNF503	YBEY	PKD2	EPB41L4A
	THAP12	CETN4P	LINC01788	AC018644.1	AL356481.1	AC064799.1	CACNA1C-IT1	NDUFB4P3	HPS4	ULBP3	EBAG9P1	VSTM1	ETV4	AP005205.2	AC125603.4	AL359764.1	RSL24D1P2	RNU6ATAC3P	HIST1H2AD	KLC4
	DPH5	MIR6856	FAM180B	AL162231.1	DMRT2	ZNF674-AS1	SNORD116-6	TOMM20P3	MYCT1	MIR4479	AC115621.1	AC012467.2	PIP5K1P2	KCTD12	NCR1	ISG20L2	NDUFAF3	AL606534.5	LEP	AC015908.4
	GUSBP9	AL512326.3	MRPL40P1	MRPS18B	LINC01402	CCNJL	RNU7-154P	MPHOSPH9	OCIAD2	MEMO1P1	AC093155.3	SNORD13E	AFAP1L2	AC004877.2	ASF1A	IRX6	ELOVL5	EIF4EP1	AC142381.2	SETD1A
	INO80B	PRMT5P1	AC008637.1	AC008737.3	ATP6V1G3	HLA-DPB2	RNU6-1158P	EXPH5	XPNPEP3	EFCC1	LINGO1	AC073342.3	PRSS50	ATXN1L	INHCAP	AC002519.1	AC005082.1	AL161891.1	EIF4G3	AC093520.1
	RNU1-67P	ARSE	NFKBIB	YPEL5	AC048382.2	AC055876.4	SLC4A4	ARHGAP25	AC013268.3	CLPP	AC010287.1	RBM39	MEGF10	CAVIN4	FCHSD1	C7orf66	C9orf43	AL139811.1	AC019072.1	KIF26B
	SNAP25-AS1	AC090241.3	MPZL3	AC105129.1	SPANXB1	PABPC4	AP000547.1	AC104237.3	RNU6-553P	AL359881.1	FOXF1	AC093591.1	AC112229.1	SHB	AC144530.1	GNA13	DOCK10	AC007384.1	FTX	NDUFB7
	LINC01424	TM9SF4	TMED6	TMEM51-AS1	ANOS2P	GPR107	VASH1	AL512430.3	AL023584.2	AC005906.2	GYG1P1	AC015912.3	C11orf88	PRDX6	RAP1B	AC125494.2	RNA5SP310	AL355488.1	EFCAB1	TMPRSS6
	ARHGEF11	AC021683.2	GPR153	BX842568.3	AL022393.1	AL137246.1	AC087439.1	AF235103.1	TMEM154	AC080080.1	FAR1	ZMYM2	ISLR	LINC01193	UPF1	AL445471.1	AC135178.3	EYA1	UQCRH	AC100835.1
	THOC3	AC132872.4	STAMBPL1	RNF217	AL391811.1	LINC01060	EBNA1BP2	MTND4LP25	CBX1P1	AC092072.1	PRICKLE2	AC138649.3	AC093616.1	LRMP	AC017067.1	ATP11B	CCDC154	AL139420.2	AL391832.3	MAP3K13
	AC133552.5	AC092042.3	RAI1-AS1	DMKN	BNIP3P37	AC092718.7	AL645568.2	C17orf107	LINC00598	MED14OS	WDFY3	ATP6V0D2	FAM86B1	SREK1IP1	HSPD1P6	TAS2R4	AC091544.3	CGNL1	CCDC91	ZNF603P
	AC018529.1	AC006518.2	AC011008.2	KPNA4	FO393409.1	AC025809.2	RNA5SP394	RNU6-1177P	MIR5582	RPL9P7	KCNC4	ZNF714	LINC01603	AC245060.4	AC024560.3	TECRP1	AC243547.1	RBBP4P5	RNU6-598P	RNU6ATAC31P
	RNU6-1098P	AAMDC	METAP1D	B4GALT6	SHISA5	TRIM39	WASF2	AL590714.1	RNU6-48P	CATSPERZ	TRAK1	AC027237.4	ZNF229	AL078590.2	RPL23AP26	BX323845.3	RNU6-178P	ZNF423	MYPOP	AC011487.3
	ACCS	PCDH1	AC011462.2	RIC8A	MIR3174	NUMBL	AC245884.11	AF127936.1	Z99129.1	VCAN-AS1	RN7SL25P	AC105383.1	AIP	RIPOR2	AC018755.1	KDM5A	SAFB	MORF4L1P4	TRIM61	FMC1-LUC7L2
	AARD	AC131888.1	AC064801.1	LINC01165	CRADD	AC068135.2	CD80	APELA	RNA5SP275	GGTA2P	SAA2	DLL4	AL121583.1	TMEM71	YES1	AC012184.3	TAF3	AP001284.1	ZNF488	PTTG4P
	TMEM134	AXIN2	AC104692.2	RF00422	LETM1	TMEM78	LINC02061	AP003108.4	AL031058.1	SNHG22	TRAPPC6B	TFG	RNA5SP493	MARCOL	HMGA1P3	Z98885.2	DCHS2	PIANP	GNG12-AS1	AC141930.1
	CISD2	SNORA79B	AC023830.3	TUBA1C	AC073072.2	LRRC8A	AC253536.6	GOLGA8B	UNC13B	MRTFB	UNC13D	AC098613.1	AL450336.1	NPEPPS	AC108448.2	AL136162.1	FDXR	WDR63	AC008443.5	MID1
	AL121748.1	CARD8	RAD51C	CCL25	AC098829.1	RPS4XP23	LINC02356	GTF2IRD1	PRND	AC093627.5	CREG1	SBDS	AC011773.3	SNRPB	RPS3P6	AL121574.1	UFL1-AS1	KRT8P23	AK2	EIF4HP1
	ERMN	PMF1-BGLAP	TANK	ARMC12	CPS1	LINC01411	HMGB1P31	AC106786.1	ABHD10	PCSK9	NUTM2B	SEPT9	BTBD11	SIMC1	Z74021.1	RHCE	ZNF610	DM1-AS	TCEA3	TBX3
	HSPD1P21	YJEFN3	AC004987.2	MAP3K2-DT	LINC00852	FAM186B	FBXO46	RPS7P3	STARD8	ZFP82	MAP4	AP000919.4	PEBP1	ACTG1P14	LINC02674	KRTAP5-AS1	CLEC18B	HSPE1P8	AC027228.2	TXNDC11
	AL021392.1	AC091180.2	CBWD3	CCL11	GTF3AP2	AL133215.2	AC008507.1	PAQR3	TRIB2	KRT18	RNF208	AP005230.1	AC022146.2	SNX10	AC069236.1	ITGAL	AL035458.1	NDUFB1	USP17L2	BCO2
	AC133041.1	LINC01093	ENTHD1	RN7SL444P	AC110056.1	AL121890.1	BUD23	INF2	DYDC1	AC087683.1	RNU6-23P	RNU6-228P	SINHCAFP1	CLDN9	WNT3	AC119428.2	AL590729.1	MIR608	B4GALNT4	AC010451.2
	RNA5SP61	AP001458.1	OGDH	RASSF5	CCN4	FAF1	PIAS4	WDR78	MMP25-AS1	AC002996.1	AL583722.1	DNAJA4	LINC02306	AC010343.1	RINL	KCNT2	NRBF2P5	MIR3128	RNF212	LINC01088
	CYP19A1	LINC02201	ATP6V0E1P3	MTDHP5	TRMU	TAF13	PRPF40A	AC090907.1	AC109583.2	PTGES3P2	NDUFAB1	AC139769.3	AL390036.1	AL049840.4	FAM3A	CDADC1	AC090519.2	NEMP2	GOLGA8UP	RABGAP1L
	CTAGE15	POLR3K	FBXO8	MIA3	AL583856.2	DDX31	ABL1	AC016700.1	TMEM87B	CCDC58P5	GOLGA4	AC099552.4	LINC02393	AC007450.1	CHRM4	LSP1P2	AL365436.2	HIST1H4I	LINC02099	RF00573
	LINC00265	AC007405.1	AC234782.2	GPN2	AC124293.1	EIF3F	RNU6-379P	AL162457.2	AL133371.3	PARS2	AC006116.10	SNX30	AP005018.2	MND1	MDS2	PHKG2	AC010619.2	FATE1	AC091965.1	AC091849.2
	AC074032.1	TTTY10	AC006042.1	SDC4	ALPK1	POLE4	AL365440.1	AL354977.1	CPEB3	OTC	ABCA8	OSBPL2	AP003465.2	IGHA2	ASB12	LMNB2	WDSUB1	VCP	PLA2G6	C2CD6
	AC010642.1	SYMPK	RIOX2	CMTM5	AC008080.2	IDNK	KRT223P	CBX5	AC090950.1	HIBADH	AC007292.1	CHRNE	GAL3ST3	AC008149.1	ARPIN-AP3S2	AC093227.2	DBET	AL512506.2	PWP1	PRKCZ-AS1
	RNU2-51P	SEPHS1P1	RN7SKP287	LPAR2	RNU6-915P	NDUFV1	AP006621.1	MMP25	AC092919.1	FOXS1	AC106886.3	AL035404.1	AC104521.1	BTN3A1	MIR4421	USP24	CERS5	AL359265.3	AC116003.3	AF038458.3
	AP003973.1	CHL1-AS2	HDHD3	MFAP1P1	AC117498.2	C11orf45	AL355864.1	NFKBIL1	SPATA31B1P	HECW2-AS1	PIK3CG	KTI12	HMMR-AS1	EIF3L	AC092851.1	ZNF200	ISYNA1	ADCK1	MALSU1	RNU6-806P
	HAUS1P1	AC004160.1	MIR4659A	BRSK1	ICK	AC016876.1	RBM19	AC007285.1	MIR6753	SH3BP5L	TRGVA	AC124283.5	DNAJC19	ATF7IP	SLC6A16	RB1-DT	TCIRG1	ZNF101P2	AL499627.2	CD8A
	ZNF254	DCUN1D1	AC004076.2	DYRK2	AC012640.5	DUSP26	SETP22	BEAN1	AC104653.1	AC007382.1	LINC01607	LINC01234	ARF6	UNC13C	AC099524.1	C9orf129	CFAP221	AC005351.1	HNRNPUL1	TAGAP
	AC079140.1	HNRNPH1	AL137005.1	APOL1	RCAN3	THOC5	RPS3AP36	AC021087.3	TSTA3	TKT	PLA2G5	TCF3	TNNT1	AC079987.1	AC012020.1	AL512590.2	ELMO1	TWISTNB	ASPH	EIF4A1P7
	AC011450.1	AL450311.1	AC017100.1	AC104984.6	GOLGA8O	TSC22D4	AP001107.9	RNU7-113P	RPL30P3	SPTB	AC005291.2	MCM7	FHAD1	SAPCD2	PPIAP22	IL16	AC010255.2	DRG2	RPP38	AL121655.1
	GNG7	NXF3	ITGB5-AS1	RNU6-375P	AC023509.3	AP000919.1	NDUFS5	ACTBP14	AP003068.1	MRPS18A	FBXW10	AC006305.3	SNRPB2	AC110285.1	AL135786.1	EXOSC3P1	CHST2	PPIAP32	FAM238A	AC009093.2
	AC067817.1	Z95152.1	RPS11P5	AL031729.1	AC008752.1	AC069257.2	GPCPD1	TMEM183A	LRIG2	SLC26A7	HOXD-AS2	AC021087.2	AC109631.1	SERPINB4	RN7SL833P	AC093458.2	RNA5SP440	ZNF71	AC012615.1	AC005921.3
	CTLA4	TNFSF11	AC068472.1	RNU6-975P	FGF5	AC011481.2	AC078778.1	LINC02630	NPIPA1	NHLH2	UPF3B	TYW5	AL391650.1	KIF16B	AL049712.1	Z83847.1	AC027575.1	MANCR	ZNF320	LHX8
	AC087362.1	BLVRB	CWC27	RPS24P17	SNX18P27	LINC00517	AC127496.5	AP003501.2	IGSF3	AFAP1	PCDHB13	LINC02574	SAMD14	PGBD1	PPM1N	TBCK	APTR	FOLR3	CCNY	ASH1L-IT1
	HNRNPA1P59	DHCR7	AC026436.1	CBX1P4	SNORD115-22	MIR500B	AC108199.1	MECR	RNA5SP385	PLEKHA7	MIR6806	AC008691.1	AC009630.2	AL139021.2	AC245297.3	UBQLNL	C5orf56	PGAM1P7	LINC01736	SHLD2
	AC084752.1	AC092747.2	SATB1-AS1	CKM	AC034236.2	LNCOG	SQLE	GK-IT1	SLC6A15	STH	API5P1	C15orf40	DHRS2	AL133216.2	AP001979.1	DSCAM	GAS5-AS1	SPATA19	RRM2P2	ZNF840P
	COMTD1	FMC1	RPL5P34	SELENOM	AL158823.1	RNU6-822P	BX284668.2	AC010886.1	BCLAF1	AC018442.3	RNU6-1000P	PCMTD2	AL133215.1	AL109809.4	RNU6-474P	SNRPD3	AL357140.3	AL450226.2	SERAC1	ARPC1A
	LHFPL3	FLRT2	AC011498.6	GRID1-AS1	NUP50-DT	MTMR6	DBP	TLE3	MIR4314	RPLP0P6	RPL23AP80	GET4	RNF128	BRS3	HTRA2	AL161431.1	AC104170.1	SRRM4	AC140878.1	DNMBP
	U40455.1	MYLPF	AL078459.1	AC010857.1	AL450326.1	RNA5SP457	RORA-AS1	SNRPGP2	NEGR1	MAP3K12	TGIF2	TIMM9	AC011840.3	AC107068.1	IFI16	AL357507.1	APOBEC4	KRT87P	AL139352.1	ZFYVE16
	PART1	DDX3P1	PTPRZ1	LIMS1-AS1	RPL23AP83	NUP54	PFN4	WDR82	RPL23AP32	AL139156.2	ZKSCAN2	C11orf95	SPATA12	H2AFZP3	MAP4K1	MIR1273C	LINC01758	AC023310.4	LINC02257	CCR3
	RF00611	AC011998.3	RARG	ASTN2-AS1	CGN	AC104297.1	AP001160.2	HLA-DPA3	AC092119.3	AL445928.1	SNRPE	CSNK2A3	PEX19	AC123912.3	DKC1	AC006450.1	AC123777.1	HIST1H2BI	ASS1P10	AC010761.5
	ELMO3	TMEM51	HSF2BP	MIR137HG	UFSP1	MUPP	AC099568.1	AC093278.2	GPD2	AC004552.1	RNU7-47P	AC108673.3	ARHGAP42P2	HNRNPC	NRXN1	RPL37P23	AC073911.2	AL122035.2	NFIB	AL049536.1
	ZNF677	ADAMTS7P1	AC019155.1	NPY4R	RNF227	SYP	AC008567.1	LDHA	TRAPPC9	ROS1	ZFPM1	RNF24	RAB11B-AS1	SOX7	CNTNAP3B	AL365209.1	ADAT3	AC100827.4	PRSS57	AP001767.2
	BOK	SPACA5	CALM3	FAM120B	HIGD2A	NAP1L1P3	SEC23A	MMP27	AL162632.1	AL355336.1	RNU6-539P	TCAF1	AC137834.1	RNU6-960P	ANKRD22	FAM162B	MOSPD3	CPNE8-AS1	AL139420.1	ERLEC1
	AL034550.1	AL360181.2	ANXA2P3	AL136141.1	TUB-AS1	MFSD14B	GEMIN4	PSPH	AL357078.1	C4B	AC091488.1	ELN-AS1	MBLAC2	LINC01352	AL162464.1	LINC02003	AZGP1P2	AC023115.1	C1orf56	IGLON5
	CICP17	AC098818.1	PFDN6	DEFB109A	AL121999.1	CSAG1	HSPB2	COL14A1	BCAM	WASHC5-AS1	RNU4-44P	PXDN	TPT1P5	DLK1	SEPHS1	AC016252.1	AC091951.1	VWC2L-IT1	CCL15-CCL14	AD000671.1
	IQSEC3	LINC02445	NUP50	HTR2A	SPRY4	ARAP2	MYSM1	MEX3D	AC079336.5	SPAST	MYEOV	OR56B4	ADI1	C1orf94	RNA5SP345	AKR1D1	PLEKHN1	RNF25	GNPNAT1	ARG2
	LCOR	AC011511.1	SLC47A2	MIF4GD	AL596094.1	DNAJC19P9	AC127070.2	KDR	PBX2P1	AL138962.1	PNO1	SLC9A3R1	AC009108.5	AC021683.1	AC120349.1	AC020688.1	PRSS12	AL133352.1	CCDC82	RPL12P41
	AC021594.2	CCDC171	OR8T1P	LINC02065	AC009229.4	AC012157.1	IQCG	AL390066.1	AC069079.1	ADAMDEC1	PYY2	AP000569.1	CYB5D2	AL160286.1	STPG3	RN7SL538P	ZSCAN16	MANSC4	AC092375.1	BHLHE40
	PDS5B	PDZK1P1	PDCD6IPP2	KCNK13	CDC20B	PQBP1	AC136619.1	AL450384.2	MIR4725	ACVR1	ARL6IP6	CXCR1	FARSA	AC002091.2	AC026310.3	SEMA4D	AL357568.2	ISY1-RAB43	UNC5C	RNU6-1315P
	SPATA20	SCN8A	WHRN	CHRM3	TRPM7	CA15P2	LINC01436	AL133325.1	PHLDA2	ATF7IP2	DFFA	RPL34P18	CXCR2	ELANE	ZNF354A	ATP2B2-IT1	AL162584.1	AC092653.1	AC084125.4	NFIL3
	ZMAT2	NFATC1	GTPBP10	OTOAP1	YRDC	MAST2	ISL2	RANBP1	ADAM11	AD000864.1	EIF2AK3	IGFBP3	MS4A6E	RPL9P29	AP006623.1	AL355796.1	CLK2P1	AL357518.1	AL442128.2	AC002543.1
	RNU6-1081P	AC007041.1	RN7SL280P	RNU6-893P	POM121C	GLRA4	SP5	SNORD116-17	AC104623.2	AC002540.1	AC004596.1	SCYL2	YPEL5P2	GOLGA6L5P	RPS23P8	CCDC13-AS1	AC002542.1	TM4SF19	MORN3	CNIH2
	AC006547.1	KCNH3	AC009365.3	CBX3P4	GRM8	RPS7P10	RNU7-119P	PACSIN3	AL135787.1	PPDPF	AL451085.2	TMEM211	IGHA1	LINC00239	APCDD1L-DT	RPUSD1	AC103760.1	AP001893.3	CDH13	BCL7B
	COL24A1	PTEN	AC016027.3	AC068446.3	DOC2B	SPDYE16	AL138881.1	RAPGEFL1	AC124916.1	MICOS10P2	RPL34P27	AC002553.2	AP003072.1	STX3	AC106872.6	C17orf82	MAP2K6	LY86-AS1	ACD	AL157702.2
	AC012379.2	AC015911.1	CDIPTOSP	RPL36AP36	C2orf27A	ARL8A	FBXL12	AL136418.1	MCCC2	IGLV3-10	AC090502.1	AC023158.1	ACLY	USHBP1	LINC01628	ATCAY	AC027281.2	PDXDC1	NPFFR2	SOCS5
	RPS29P33	FOXL1	FRMD8	RPS28P7	FNDC1-IT1	SCARNA6	MATN3	ZNF705E	AC008080.1	VPS33B-DT	TSR2	AC098679.3	AC008063.1	GSG1	PIGB	RNF114	ABHD17A	LRRC73	AC025918.1	HORMAD1
	CD38	DUSP5P2	FAM225B	AL353780.1	MTND5P10	AC118549.1	AC025442.1	FBXO15	S100A6	MANEAL	AC006033.1	SLAIN1	AC100793.2	POLD2	TXNRD3	MAFK	AC012417.1	SLC1A7	AC025594.2	AL157944.1
	POPDC3	TMA16	LONRF3	CLECL1	AP003716.2	CHIAP1	UFD1	CST2	PINLYP	ACOX2	UBL5	DPY30	AL133153.1	HNRNPAB	MFSD2B	AC139099.2	AC011939.1	CCK	PWAR1	ULK4P1
	AP001351.1	THUMPD2	PVRIG	AC068025.1	PPP1R7	TRG-AS1	AC005392.1	AC017081.1	MIR302CHG	Z69666.1	RANBP3	AC087071.2	AC008050.1	FGFR4	AL136452.1	MRPL45P2	AC079336.3	MIR646HG	SAMD12	GLDN
	CBLL2	AKAP17A	POLE2	AC109635.5	CENPE	Z97653.2	TTI2	LATS1	AC137932.3	Z93930.2	AC008629.2	FBXO7	AC010175.1	MELTF-AS1	AP001803.2	LINC02555	ACPP	AL137024.1	AP003469.1	CD69
	PAIP2	RNU6-422P	AC055713.1	CD200R1L-AS1	MYLK2	AL356124.1	AF131215.6	AL031666.3	RUFY1	RPL7L1P5	RPL29P14	CTBP1-AS	AADAT	SOX15	PAGE5	AC107953.2	NCKAP1L	AC020703.1	RPS29P16	TMSB4XP8
	AC138866.1	AC010542.5	AC008972.1	RN7SL674P	OR5M14P	AC091044.1	RNU4-5P	SNORD121B	BOD1	AC113935.1	ELP4	PFDN1	FAM120C	SLC40A1	SOX5	MTND4P24	RECQL	LINC02513	SLC25A15P2	GALNT2
	AL137186.1	POMT2	AL162730.1	SVEP1	AL589993.1	AP000529.1	RN7SL202P	MTND3P10	LINC02523	AC010491.1	ACBD3-AS1	APPL1	ZNF225	CCNO	SLAMF1	STRAP	DUS4L	PROM1	DNA2	WWC3
	AC096536.2	SLC16A14	AC010285.1	GTF3C2-AS1	RNU6-589P	AC009118.3	TBC1D30	AC093330.2	LINC02018	AL138999.1	RPL12P30	AC009086.3	ABHD17AP6	TAZ	AC100797.1	ADO	AL031717.1	GRIA2	AC018868.2	Z95624.1
	AC138969.2	SFT2D2	LINC00525	AC008740.1	AP001372.2	AC113361.1	AC022400.4	LINC02642	ZSCAN5C	AC009509.3	TBX19	PF4	DFFB	PAX3	OR2F1	CHD1L	AC073529.1	NT5E	CCHCR1	AC111188.2
	CFAP298	EEA1	TRIM74	AC010333.1	VN1R51P	AC003965.1	RBMS3-AS1	NSUN2	C10orf111	IQCA1-AS1	C11orf68	AC020910.1	ALPK2	RNU4-14P	HP1BP3	COL18A1	AC108751.4	AC007541.1	PIGQP1	AGAP1
	RN7SL376P	DPEP3	TMEM251P1	AC020659.2	EPC1	AC002480.1	AC011461.1	TTC34	AC098820.3	TMC3-AS1	AC004540.1	SMAD6	RNU4-35P	RAB3IP	MAPRE2	AC129807.1	LINC01960	GIP	AGBL5-AS1	HIGD1AP10
	AC008114.1	SCAF4	AP000354.1	CRISPLD2	PIGW	ATG10	AC022001.2	WIPF3	AC004865.2	RND1	L3MBTL4-AS1	AKAP4	RPS28P8	RNU6-476P	AC009229.1	MAPK11	OMP	CUL9	RN7SKP266	KRI1
	ZNF430	TMEM19	AC005261.4	SLC22A2	SKP1P1	DYNC1LI1	AC012485.1	DGCR5	AC034232.1	AL035420.2	DOT1L	LINC00622	RF00090	ETNK1	AC211433.2	HIST2H4B	AC124242.2	RPS6KA2-AS1	AC004477.1	AC118758.2
	AL049775.2	MET	PVALB	AL359232.1	AL136454.1	DEFB109B	AL592114.3	AC241520.1	FAM160A1	AC008083.2	AC133963.2	AL139397.2	MRPL46	AC018358.1	KHSRP	AC022413.1	MIR5188	APBB3	IFI6	MORF4L2P1
	RN7SL754P	PDCD2	HAUS3	RNU7-130P	BNIP3P17	AC096888.1	PSMA3	RNU6-618P	AC093789.1	AL163642.1	NFATC4	LSS	SLFN11	CPNE6	CR381653.1	GINS1	AC138028.3	GK-AS1	RMI2	LARP7
	AC010677.1	TMEM97	AC239804.1	TCTN1	AC009108.1	MALINC1	AC103853.2	NUDT17	HSDL2	CASC2	HDAC1P2	PTPN20	CNN2	RNU6-377P	CYYR1	FEM1C	CHRNA1	LINC02605	AF127936.2	AL158817.1
	AC092115.1	DIMT1	LINC01345	AL021918.1	PTPN20CP	AC073107.1	SGO1	LINC01137	AL392048.1	HPR	RNU6-689P	AC117500.1	ATP6V1G2-DDX39B	PDE11A	SNRPEP9	HSPE1P23	AC010261.2	RNU6-353P	ADARB1	F3
	CARS-AS1	FAM57B	GNB3	CAMTA1-DT	AC092807.2	PDCD1	ZNF214	AC076968.1	AC114730.3	AC010326.3	IGLC2	TMEM81	AC113174.1	AC012065.3	AL513122.1	RNU6-742P	AC010320.2	RNU6-1091P	AL121990.1	CD6
	ZNF431	NDUFA8	NNAT	IGKC	AQP5	AP001596.2	AC008667.2	AKTIP	SNX19P3	AC007849.1	IDH2	PABPC4L	CCT5	SLC33A1	RNU6-545P	MRPS15P1	DDX39BP1	HPDL	RNU6-818P	CPT1A
	SERPINA5	AC009244.1	SNORD116-15	SCFD2	MIR4324	TMEM186	LINC02324	ADPRHL1	RNU6-678P	TMEM75	LRRFIP1	FCGR3B	RPL23AP47	KLRD1	AL591848.3	AL138916.1	LINC00683	STC1	AL356277.3	HAGHL
	AC107959.3	MDH2	ROR1-AS1	NT5CP1	AC092078.1	AL109809.1	AC110799.1	AP001257.1	KLRC1	AC079447.1	MROH8	ZNF454	ST13P10	AC114956.1	CCN2	RN7SKP167	ERCC6	AC239800.2	AP002770.2	FAM19A1
	ZNF836	TRIM5	AL137779.2	FAM162A	AC079807.1	AL513366.1	RNU6-1005P	GPR20	AL731567.1	INSM1	NEDD8-MDP1	MCEE	MOB3C	SLC2A7	MAGEL2	PEX11B	SMIM4	LINC02298	IFITM1	AC010894.5
	NTRK1	BCAP31P2	USP4	HIPK1-AS1	MTND6P32	AL358876.1	AC079354.2	AC008802.1	RNU6-390P	AC011445.2	RNA5SP302	KCNMA1-AS1	DECR2	AC005237.2	NES	LINC02287	GUSBP1	TP73-AS1	AC099336.2	SORD
	MKX	PAMR1	LINC01850	SPTBN5	BNIP3	AL138785.1	TADA3	CDRT4	AC097639.1	AC099509.1	HLA-DQB2	MYLIP	RNU1-47P	NOL8	AC018946.2	DDA1	RSL24D1P8	AC090802.1	WWTR1-AS1	HOXB2
	SUPT4H1P1	AC008088.1	AC009269.5	COLGALT2	ARHGAP22	DAB1	GFI1	ASIC1	RPL6P25	LNX1-AS2	HSBP1L1	AP003086.2	AC004884.2	CTNNA3	CALM2P3	EIF4A2P3	SLC12A7	ATF6B	RPS20P15	SIRPD
	PRKAR1B	AC079296.1	DDIT3	BNIP3P31	FAM189B	CKS1BP6	ARHGEF4	MCF2	PFKM	CARM1	AC016820.1	EGR1	LUZP2	AC048351.1	ERICH3	RPS4XP9	ZNF17	AC011284.1	MIR548C	MAVS
	CSNK1G2-AS1	RPL12P38	AL450468.2	RBM14	TMEM82	EEF1AKMT2	KLHDC8B	RAB28P5	TEKT5	TMEM161B-AS1	AGBL4	AP001063.1	SRRM3	MIR3915	PEX7	RN7SL753P	SRSF11	YPEL2	TIPIN	ZPR1
	AC005486.1	KCNK15	GPHN	AC138649.2	GABRB1	RPS19P7	PPP6R2	AL360182.2	LINC00973	LINC01136	AL353898.3	AC083967.1	AL008638.1	AL590762.3	AC012557.1	LINC01195	RN7SL362P	TYMS	AC073389.1	EFCAB5
	AC073136.2	AP001992.1	IMPDH1P8	RNU6-1256P	AC016712.1	C8orf86	AC108516.2	AC002347.1	AC127455.1	AC025580.1	RN7SL382P	AC092354.1	IL18RAP	HOMEZ	ODR4	RPIAP1	AL591623.2	SHISA8	AC073896.4	OR7E66P
	RPS26P13	RN7SL801P	SLC39A9	AL592431.1	ACKR2	RNU6-437P	C21orf91	NDUFB3	MTX2	AL672207.1	RPS3AP26	AC097533.1	AL591845.1	GPR19	TXLNGY	MIR345	RN7SKP123	PYURF	UBAP1	MIR765
	ULBP1	LINC01806	SNX18P5	CROT	AC009095.1	AP003555.3	MTFR1L	MARK4	AL645608.1	RPL23AP8	MRPL11	AC009511.2	LINC02352	IPPKP1	ATF3	MIR5702	NDUFA11	SLC16A6	TYK2	RPS29P5
	GBA	RPL23A	OSTCP8	RWDD4P1	KLHL18	KCNJ12	SNRNP27	AC008033.3	AC104651.2	BACH1-IT2	Z70280.1	AC104596.1	ZNF583	DBNDD1	IGLV2-23	WDR26	RAD51AP1	ADA2	SNRPCP13	ENPP2
	ZNF667	DNAL4	AC026191.1	RANBP17	AC008013.3	SETX	C10orf25	MYO9B	RPS2P2	AXDND1	AC021146.3	CDC5L	TMEM185A	ST7L	TRAJ27	ZAP70	GAPDHP72	PAM16	BCDIN3D	CCDC71
	RF00404	AC011815.2	AC008074.2	SYT9	PSMB4	NDUFAF5	MTERF2	LRRC40	GRSF1	TMEM130	DUTP6	AL773524.1	LRRC37A	RNU6-891P	AC016957.1	PRPS1L1	PRKCI	RAB35	ALDOAP1	PGS1
	MAL2-AS1	HLA-J	AC009142.1	LMO7DN	HNRNPA2B1	TBC1D10B	AC068620.2	KBTBD11-OT1	RTL10	RAP1AP	AC116036.1	SNAPC4	RNU4-2	TMEM161A	AF130359.1	AC073934.1	AC079140.4	ABCA2	AC010997.5	RNU6-781P
	EMC7	LINC02577	EXOC3	AC112484.4	AL121917.1	SETP21	AC005702.1	CITED1	LAD1	RDM1P3	STXBP1	MSTO1	GTF2F2	AL035665.1	AC004160.2	NUMB	DDI2	AC112229.3	TMEM176A	RANBP6
	RNU6-10P	SERPINA7	TMEM156	SOAT2	RUBCN	AC009220.3	AC026316.1	AC007342.6	AC069444.1	CDC42BPB	NDUFA4	LINC00994	AC091492.1	PDZD4	AC007610.3	EVC	PAEPP1	ITM2BP1	CCBE1	AC016910.1
	AC005224.4	AC008747.1	MIR4488	SEM1	BMP4	AC008870.4	MAGEA12	AL158828.1	SSUH2	AL627231.1	LINC02502	MIR4645	TNRC18P1	UNC119B	AC007878.1	AL445220.1	FO393419.3	USF2	RN7SL610P	HELB
	KDELC2	FTLP1	AC108102.1	RIOK1	RAB40AL	MEIS3	RPL7P23	THPO	MPLKIP	LINC01119	CCL22	RPS2P48	PSG5	LUZP1	FP671120.5	AC139453.1	LINC02657	AP001107.6	AP001324.1	AC105339.5
	NAMA	RPL7AP30	TPP2	MTCO3P22	AL162386.1	KRR1P1	ZFHX2-AS1	KIF15	AC092265.1	CCDC17	MIR623	HOXB8	RPSAP64	ZNF263	ARFGEF3	KCNE3	AC020765.4	AC009831.3	PPT2-EGFL8	CRYBB2
	HMG20B	AC090193.1	HACL1	FAM32CP	AC087741.3	AC211433.1	FP236240.1	ADAT2	AC004448.3	AC010230.1	MT-ATP8	AC106820.4	NONOP2	AC007780.1	AP002884.2	MIR1250	MORF4L1P1	RPL31P11	CCDC7	AC011389.2
	TSPAN10	CXCR3	C2CD4B	AL021707.6	AP003354.1	LAMA1	CCL1	SAYSD1	RNU6-114P	VN1R81P	HOXD4	HOXC4	PLET1	ABRA	AC104232.1	AC098935.1	AC011477.1	RNA5SP479	AC027801.4	ANGPTL6
	TDGF1P5	RPL7AP11	MIR7851	IDH3B	LYRM1	AC011491.2	AC026771.1	MTCO3P16	MIR933	AC125807.2	SBF1	PHF13	AC017074.1	AC016894.1	RNU4-56P	RNLS	PRRX2	TRAV41	AL360182.1	EIF4E3
	AC069113.2	AC005912.1	SUSD3	AC007336.3	TRIM34	ATG4B	RPL12P13	SIRPG	RNU7-56P	ERGIC2	ANKRD20A1	RNU7-110P	MIGA2	IRAK4	LINC02608	PHACTR4	PLP2	AL359095.1	LEPROTL1	RN7SL223P
	MIR556	USP30	RPS15P5	SPG21	USP50	GZMK	CTTNBP2	AC015922.2	AC090587.1	ADCY1	PAFAH2	AP006219.1	C2orf83	AC027335.1	HNRNPA1P16	FOXN3-AS1	AC079766.1	BMPR1AP2	RNU6-583P	AL354813.1
	RNU6-1300P	AP006287.2	RPL27AP5	MEST	AL133243.2	STARD10	AC025176.1	NOL4L	EPB41L1	WDHD1	CYP21A2	AL445433.1	LINC02235	NPM1P28	AC005520.1	FOXC2	AC009716.1	SUCLG2	CNTN4	AC007686.2
	MXRA5Y	AL009172.1	AC233968.1	FBXL13	VN1R84P	FAM87B	MEI1	AC010323.2	ANKIB1	FBXO5	RN7SL76P	AC006254.2	AL161629.1	DENND6B	SNX7	WDR4	FAM111A-DT	CPQ	FAM106A	AC103810.4
	PDC	SLC26A8	C12orf43	ZC3H11A	AC009034.1	CDK8	PGAM3P	AL117350.1	RAB15	NMTRQ-TTG12-1	GTPBP3	AC007595.1	BRICD5	AC004264.2	AC002044.1	PHACTR2P1	KIAA1549L	METTL17	ZNF3	SPTAN1
	CA3-AS1	RPL41P1	AC245297.1	ANKRD17	HNRNPKP1	PPIAP74	MAS1	AC092903.2	COL6A3	BCL7C	AC099518.1	SPATA1	POLR3D	AL133215.3	AC010320.4	EQTN	HIST1H2AC	AL031733.2	TRMT112P3	ZNF391
	SNHG6	AC234775.1	PCDHGB6	Z93930.3	AC011509.2	STAR	AC105206.2	RNU4ATAC12P	AC006363.1	AC008429.3	AC245014.3	AL391069.3	ADGRA3	AP001273.1	PRICKLE4	AC145285.4	MLF2	AC092437.1	USP30-AS1	AC106038.1
	ABCF2	AC123904.1	AL078604.1	LINC02435	AC129492.7	AC007996.1	AC005832.1	RNU6-485P	UHRF1BP1	PARVA	PITX3	AP002761.3	MTX1	AC024270.2	RF00272	AC011676.5	AL355300.1	RNF148	AC005344.1	AP002847.1
	BORCS8-MEF2B	AL139158.2	COL19A1	HMGB3P7	HLX	AL513324.1	KCNMB2	SPRN	LPIN1	MYL6P2	GRIPAP1	RNU7-70P	AC245100.3	SERPINA10	AL355990.2	MTATP6P17	RNU6-45P	SLC25A6P5	AC004585.1	IKZF4
	PKNOX1	AL359396.1	SNHG3	NOP53	BMP10	MTUS1	UQCR11	MIR553	TCHP	SAMHD1	RNY4P17	DCAF13	AL592148.3	PRELID2P1	AP003973.2	SMIM30	OMD	LINC01355	CASP2	ENPP7P5
	PRODH	AC006116.1	AC018653.1	VAT1	TRBJ2-3	AP001318.1	LINC00407	AC116609.1	ASRGL1	RPL13AP19	AC023644.1	LINC00840	AP002364.1	AC011998.2	AL158212.4	NPC1	LINC02057	AC067863.2	AC011466.2	TCTE1
	AC055811.2	TLN2	IKBKGP1	LRRC17	RNU6-436P	MEPE	AC090164.2	DPY19L2	AL136295.5	HIF3A	AL078604.2	AC104763.3	OR2A13P	ARHGAP1	ORM1	RNU6-1223P	TSG101	CD99P1	MTRNR2L9	ZNF691
	GATC	RPL17P19	EXT1	AC107464.1	XBP1P1	RPUSD4	IL20RA	AC012065.1	AC092171.1	CXXC5	PHOSPHO1	SNORA31	KDM4A	AC007786.3	IFITM4P	APOA1	PCCA	MIR3935	MIR122HG	AL359636.2
	MAMDC2-AS1	UPK3BL1	AL161668.1	TSPAN15	AADAC	AL133406.2	HGC6.3	AL136313.1	BRD1	AC007029.1	AC008781.3	AC116049.1	AL445465.1	AC004967.1	TERF1P5	AC107031.1	IL37	RPL13P5	RCN1P2	GYG1P3
	AP003171.1	AL109741.2	CRIM1-DT	LCLAT1	TMEM136	C7orf26	HBB	RNFT1-DT	ZNF496	ETV1	TOR1AIP2	FEZ2	DIRAS3	FRG1-DT	RN7SKP230	FAM221B	PKP4-AS1	AC090283.1	AC112907.2	GAPDHP42
	RN7SL78P	RND2	RPS3P7	AC087645.2	AC004801.7	AC087286.1	RNF152	AC010327.2	AL392183.1	AC093458.1	ABHD15	OPN4	OSBPL1A	RPL21P75	AC010266.2	KCNK5	SRMP2	AC010385.3	FZD7	CDC6
	AL031719.1	INTS9	N4BP2L2-IT2	SNORA2A	AC112491.1	ZNF837	AC019257.1	AC138951.1	AC092573.1	GSTCD	MYO5A	OAZ3	AC010203.2	AL139021.1	AC073365.1	FAM86DP	LYZL4	RNASE3	NCAPG	ZNF350-AS1
	RN7SKP198	CASP8	RNU6-722P	RN7SL48P	RNU4-78P	FAM3B	BNC1	SLC16A10	AC074029.1	CRHBP	AL157832.1	NPR1	HSP90AA2P	TSPAN8	SLC25A35	GRAPL	AC025031.2	ZCWPW1	AC243919.1	TRIM26
	SCARNA8	AL359922.3	BTN2A3P	AL122020.1	AC006504.1	LINC01095	AL078645.1	AC092112.1	TRPV3	RNU6-21P	KIDINS220	FAM90A26	RPL29P33	RNU6-897P	CFL1P5	CAV1	AC010883.1	FAM219A	LINC00706	AC055764.1
	AC097638.1	COL9A3	VDAC3	NUPL2	RN7SL799P	PRIM1	HRH4	AL365318.1	AC010210.1	MTRNR2L2	CDKN2AIPNL	PYHIN1	CAMKMT	CKAP2	AC019080.4	TBC1D10C	AL136962.1	LDB1	HIF1A-AS2	MYCBP2-AS1
	RN7SL628P	CASTOR2	RF00096	NOL12	AL158166.1	LVRN	DVL3	LIG1	TMED4	RNA5SP202	LINC02549	CELA1	PPP1R11	AC083806.1	DPEP2NB	IMPDH2	AC048382.3	SNORD14A	PDHX	AC073415.1
	AC097474.1	NRSN2	AL121983.2	AC004923.4	NAT14	AC026412.2	IP6K1	AC080013.4	MGAT5	SLC35A1	NEURL2	ADPRH	LRRFIP2	NTRK3-AS1	SLC22A10	BBS12	MTUS2-AS1	AC015660.1	AC104117.5	TXNP4
	AC078842.1	RN7SL313P	RPL36AP26	CHKB-CPT1B	SFXN1	AC023055.1	AL590490.1	AC105390.1	INSIG1	AC005393.1	SERPINB7	RNA5SP201	AL050343.1	AC092119.2	LHFPL3-AS2	ARPC3P5	CDH5	AC079140.5	GPM6A	SPOUT1
	TARBP1	AL020993.1	BTN2A2	COA5	AC016597.1	MORF4	AC099494.3	RNA5SP95	AC006115.1	MOB2	ZFAND3	VDAC2	CD83	GCN1	Z99716.1	EEF1GP5	LCMT1-AS1	SPON1-AS1	GLP1R	AC079075.1
	RPL23AP6	AC073314.1	AC104640.1	RNU6-1316P	DDTL	AC026150.3	AC104187.1	AC004264.1	AC013726.1	U47924.3	ZNF681	AL137002.1	AP1AR	SEPT7P8	NPIPB12	AC087072.1	GAS2L1P2	LINC02377	HMGB1P21	AC233723.2
	EPB42	IGF2	CALCB	EPPIN	AL391244.1	WDR89	AL023806.1	ZNF35	RF01233	AL355863.1	ARL8B	CSAG3	AL354710.2	RAB39B	RNU6-717P	SLK	AC064807.4	ALKBH3	AC023024.2	ADIRF
	TRAM1L1	PCYT2	Z73417.1	SERTAD3	AC108865.2	ABHD11-AS1	AC126615.2	ZNF419	SAMD10	AC009245.1	HIST1H3I	AC093799.1	GBP5	AC012170.2	AC092903.1	TEX36	MSMO1	AC005840.2	RPL3P6	AC106738.1
	KRT17P8	AL049610.1	TREHP1	AC026904.3	ACOT7	ABR	PIGH	YWHABP1	INPP1	AL137783.1	AL589745.2	PSPC1	MASTL	AC021148.1	FXYD2	OTUD5	AC010460.3	BRCC3P1	AL024498.1	AC006378.2
	ZFYVE9	LINC00412	AC231533.2	HDGFL1	AC107032.1	MIR4664	AL117339.3	AC009220.1	GAA	AL445363.2	AC098590.1	CSTF2	TRBJ2-2	IRF1	AC091959.2	AC087260.1	KLRF1	AL359317.2	ALDH3B1	AC233699.1
	AC233992.2	AC060771.1	AC004000.1	ITIH4-AS1	AL391497.1	MAGEA3	AC069360.1	ZBTB22	MIR3135A	AC083805.3	TERF1P1	COG4	COLQ	PPP1R16B	MMP12	SIRT2	KIR3DL1	RNU2-46P	RNU7-102P	SLC35G5
	AL162727.2	F5	AL162632.3	GPR162	AC079779.2	AL391422.1	AC005697.1	POLR3A	AC022748.2	RFLNA	BLOC1S6	NME9	TPSG1	AC092967.1	KCNH8	AC079866.2	IFT20	FOXQ1	TVP23B	MIR659
	IL5	PPARA	AL354696.2	AL449423.1	OR7E91P	IGHG3	COL23A1	LINC00545	GSE1	AC011257.1	TDP2	MAP10	AC131009.3	C1QTNF1-AS1	BCL6	AC008750.1	AC008280.1	NLRP11	LINC01300	TRIM60P14
	ELP1	AC010319.5	AC119674.1	HSH2D	PTH2R	AC003684.1	EGLN3P1	AL009179.1	COL18A1-AS1	PLEKHA4	RNY4P23	RNVU1-17	EMD	AL031775.2	LINC01358	AC233992.3	SNORA22B	AP000350.7	AC004466.3	NUDT22
	STARD7	AC135050.3	LAMTOR3P2	SNX14	HIST1H2APS4	HTR6	OGFOD1P1	LETM2	ADI1P1	AC023818.1	MIR6793	AC126474.2	VTA1	MIR4803	MMP24	MIR3133	MCTP1	TBCB	NPIPA3	AC100778.1
	SAP18	AL160006.1	RNU6-944P	AC069431.1	AL024474.1	AC011893.1	MIR5680	CFAP73	MIR4690	AC079193.2	RPL15P14	MAPK1IP1L	CACNA2D3	EIF3IP1	AC067940.1	AL590133.1	HPRT1P1	TMEM200C	REL	FLNC-AS1
	AC122134.1	POLR2CP1	YRDCP2	E2F5	AC026458.2	AC090206.1	MT1M	AC022748.3	OR5G3	RNA5SP195	RPL23AP81	AP000943.4	PIP4K2A	AL049872.1	AC010536.1	HLA-DQA2	USP33	AC145138.1	UBE2SP1	IGHV5-78
	CSF2	AC211476.1	MICU2	AC005020.2	AC006963.1	LINC01786	AC004830.1	RNU6-793P	AASDH	ZIK1	SGF29	MYO1C	CNOT11	AC026355.2	AC106894.1	RN7SL265P	DHRSX	AC138305.3	RGS17P1	ZNF600
	BX539320.1	AC139749.1	AL118506.1	AC006001.4	NFKBIA	TM7SF3	MTNR1B	TRPM3	AC003986.2	PNMA8C	NRG3	ARMH4	C7orf61	SMIM15	KIF21B	AC024257.4	AC083806.2	AC139769.2	PRR7-AS1	RF00599
	LINC01443	AC126603.1	AC004053.1	RN7SL209P	HIST2H2BB	VIT	SEC62	AC104078.1	ZNF268	MAGEA6	CCR5	AC022858.1	AC007431.3	LINC01169	RNU6-757P	RPL12P33	SLC46A2	GABPB1	RBBP4P3	RHNO1
	AC131235.1	RNU6-57P	PAX8	AC011479.1	AC005332.4	TTC25	RSU1P3	NEIL1	AC024610.2	BX072579.1	AC116312.1	PADI4	RNU6-1294P	AC004908.3	ZNF800	YLPM1	NKX2-8	MCM3AP	AL714022.1	AP4B1-AS1
	LACRT	BSN-AS1	TRAF3IP2-AS1	KCTD1	FABP7P1	KCNQ1-AS1	AC022973.3	XCL1	CAPN2	AL353150.1	UBE2Q2P2	AC021766.1	LINC02195	UBE2V2P3	AL356580.1	CDH16	AC106820.3	RPS20P4	HELT	MARCKSL1P1
	AC011742.3	CDK5R2	AC009804.1	NHP2	AL121899.1	GNAI3	AC122136.1	ANKRD30B	AL390728.5	AC005330.1	RPL7P60	RUNX1T1	AC006273.1	AP003733.1	AC092017.1	AC093166.2	IGHV6-1	IGKV1D-27	Z99497.2	XRCC4
	TLE4	NTAN1P3	PRKRIP1	RPL21P134	NKX6-1	GATM	AL590556.1	EIF2AK4	MVB12A	RPL12P2	AL021879.1	LYG1	DIP2B	PGK1	LINGO3	SUCLA2-AS1	AC012625.1	AC016877.3	TECR	AL121987.2
	PGAM1P4	AC091516.1	AC012467.1	CDS1	KMT5A	AC093249.6	GPC2	TESPA1	CYP4F29P	AC074051.2	RNU6-414P	FTLP5	BMS1P22	LRCOL1	EIF4A1P5	SNORD100	AC069154.1	KRTAP2-3	APOBEC3A	GIMAP5
	CFHR1	H2AFZP6	AC114781.1	NOL10	SCIN	AL138966.2	AC114730.1	FAM47DP	RPS3AP25	PTH1R	COX6CP12	TPTEP1	CRACR2A	AC123900.1	PABPC1L	AL645939.4	RNU6-661P	AC008966.2	GNPAT	CSNK1D
	ZNF267	CD2BP2	AC092100.1	KCNE2	VN1R42P	MIR4667	FO538757.1	AC244453.1	OPA1-AS1	NUDT6	P2RY1	AC069542.1	SLC12A5-AS1	Z69890.1	AL157407.1	AC092720.1	LDB2	HMX1	CRB3P1	CD1A
	APOBEC3H	CNN2P12	AC019322.3	SMAP1	ZDHHC6	ST13P18	FBXL2	MSANTD2	AC007237.1	AP004609.3	ICAM3	AC007998.5	IGLC3	AL513534.1	HPF1	TRIB3	HMGB1P8	AC254629.1	KRT34	CPEB1
	RNU1-122P	ATP5MC3	HYAL1	LINC00323	AL391095.3	SNX2P2	SLX4IP	GAPDHP68	HCG22	AL391422.3	ALG11	HECW1	TRIM16	FGF9	AL353151.1	ILF2	BX470102.1	TMEM260	AL513185.2	LINC01852
	NUP210P3	AC004381.1	SLC28A3	MIR544B	GPR75-ASB3	NDUFV3	KTN1	AL157838.1	PLPP7	ZNF77	HOXA5	LIPH	ORM2	HSD11B2	AP001922.6	RPL39P6	AC099518.4	AC084757.2	BAK1P1	AP003386.1
	AC234778.1	AC009269.2	EEF1DP8	TXNRD2	UBL7-AS1	AREG	AL591926.6	AL353705.2	AC005255.1	PIH1D2	C1orf112	AL355916.1	ELOVL7	COMMD8	LINC02223	AC096631.2	TANGO6	SIGLEC15	LHFPL4	AF131215.3
	RNU6-677P	RN7SKP276	PPP3CB-AS1	ENOPH1	APLP1	SEPT14P2	ANP32BP2	AC108114.1	ATP5PB	NOL6	Z82243.1	IGLL5	LINC02296	CA14	CPA2	AP000484.1	RPL17P46	WDR45B	RPSAP70	AC018635.2
	ANKRD20A5P	GPRC5B	RPL36AP29	SOX9	AC005703.6	NMI	PARP12	WASF1	LYPD6	MOB1B	AC069218.1	FCHSD2	AL096869.2	CYB5R2	SAMD11	VAV3	GPR35	ZDHHC18	AC023906.1	ADIPOR2
	AL356387.1	AIMP2	KCNH7	RNA5SP122	AC007225.1	GNPTAB	RF00212	KCNIP1	ZBTB1	MED30	AP003396.3	AP000769.3	AC037486.1	MIR1179	RAB5B	AL512306.3	RPL4P2	USP47	PLCG1-AS1	AC004917.1
	SPDYE3	ALG6	RN7SL164P	RNA5SP370	JMJD1C	PABPC1	LINC00654	AC009171.1	LINC01914	ADGRB3	RNY3P8	UPF3AP1	RBMXP2	PDXP	PLSCR4	EIF2S3	HDGF	SLC17A9	NTNG2	AC112496.1
	PLSCR5	AC092364.2	RN7SKP244	RDH16	RP9P	CD96	AL133380.1	AC131009.2	ZUP1	AC008736.3	MMP23B	RPS3AP6	RNU6-247P	RHEBP3	AC008269.2	CFL1P2	MTHFD2P5	TRAF3IP1	UBE2E1-AS1	AP002981.1
	CCAR1	AC018521.3	AC243829.4	EDN2	RNU6-1224P	RPL39P40	LINC01444	AL606834.2	PHF20L1	PLAC4	STK4	OR51C1P	AC103591.2	NAA25	TET2-AS1	CYP2A6
Bvs.D	IGF2BP1	IGF2BP3	IGF2BP2	AL049543.1	HMGA2	GOLGA2P7	ANKLE1	HOXB-AS4	RAD54B	LIN28B	GOLGA2P10	MIR196A1	KIF15	AC103702.2	VAX1	AL023775.1	RAET1K	AL162411.1	TICRR	HOXB13
	PLAGL2	YEATS2	DNA2	AL009179.1	PRAC2	BTN1A1	CAMK4	CDC25A	ARFGEF1	SLC25A24P1	PBX2P1	TONSL	ESPL1	MCM10	ZNF696	ZNF695	AL662890.1	MTBP	DEPDC1B	DLK2
	SLC6A15	LINC02037	SMC4	AC009486.1	CHRNA5	LRPPRC	CSPG4P10	CPSF1P1	HOXB9	UBE2Q2P2	NINJ1	WDHD1	GAS2	FANCD2	PMP22	OR2M4	NBPF4	DHX36	ONECUT2	CDX2
	RF02133	TGS1	SLC5A4-AS1	SAR1AP1	IGFBP7	HSP90AB2P	ANAPC1	NCAPD3	LINC00630	FOXG1-AS1	ZNF724	CEP128	BNC1	NBPF6	AC005592.1	AC243919.1	MAF	SENP2	AC093010.3	AC006058.4
	E2F5	ORC6	PRDM13	TAGLN3	NUP205	AC091133.2	LINC01844	AC006058.3	C1S	BLM	LINC01967	VRK1	LINC02282	SPRY4-AS1	HELLS	DDIAS	MSH2	RTKN2	G2E3	LINC01694
	GINS4	NUP35	GPHN	KIF20B	AC018641.1	AC012123.1	AC112777.1	BEND3	FANCM	INCENP	BUB1B	HEATR1	CSPP1	OTX1	NUDT18	ZBED9	DLX1	NUDCD1	AC113355.1	MCM8
	NOTO	CLCN2	ACVR2B	FSCN1P1	AC006058.1	ZNF623	HOMER2P1	PRSS16	YPEL3	TMEM68	OR1F1	CACNG7	GJA4	ZFP36	TMEM151B	TSSK5P	HJURP	CHD7	FIRRE	DLGAP5
	EXO1	KIF18A	RBM12B-AS1	AGO2	PHF6	CAD	VIRMA	AC091133.4	GGH	SLC25A15	HSP90AB3P	SCAT8	SMARCC1	LINC00513	UBASH3B	TIMELESS	PRKDC	RBM28	CDH12	C1R
	RFC3	DMRTA2	AC090578.1	MCOLN1	MTNR1A	ISCU	ETV1	POLR1B	AC044860.1	TNFSF12	PLAG1	RGS20	ISL2	ZC3HAV1L	ERCC6L	LINC01399	SPDL1	POMK	WNK4	LYVE1
	STEAP1B	OLFM3	AGGF1P2	BMP5	WDR43	POP1	AC108025.1	WNT3A	ATP6V0D1	ATAD2	ECSCR	CDH7	CPSF1	XRCC2	KMT2B	AUNIP	PNRC1	ILF3	EIF1	HSPB2
	SELENOI	DEPP1	AL356740.1	HEATR6	UHRF1	DUSP1	ITGA4	METTL3	RBM12B	LINC01224	DLX4	FBXO24	RNASE1	KIF23	INTS8	KLF9	AC114803.1	RFWD3	MPP6	UBR5
	AC092957.1	ULBP3	JUNB	AC008443.3	PCDH12	SLC25A21	MTMR1	CHRNB2	DNAAF2	MIS18A	CIP2A	AC007128.1	STAB1	PDGFB	CENPI	LINC01385	AL161891.1	DCAF13	CCDC27	LARS2
	NCAPH	PEX11G	AC244394.1	BOLA2-SMG1P6	AC113192.2	TFAM	RFPL2	AL121932.1	CDK5R2	GTF3C2	AC233992.2	ORC1	XPO5	CRYGEP	AC044860.3	HERC2P10	ZSCAN23	TDGF1P7	TMEM273	PRSS3
	AASDHPPT	MTREX	EML4	SRPK1	MSH6	MGST2	CEP72	COL26A1	VSIR	ACTL6A	KCNQ5-IT1	CDCA7	AC073046.1	CENPF	PSAP	KIF11	CD93	AC012574.1	STIL	TERF1
	GINS1	AC021876.1	KLHL14	44257	TMEM37	DUSP4	ZC2HC1A	CENPO	POLQ	AL662791.2	NCAPD2	BTF3P2	GAPDHP14	MEMO1P1	POU4F3	MIR138-1	SAT1	MAP3K8	IGDCC3	INSYN2B
	AC064875.1	PDLIM2	FOXN3P1	FCGRT	CSTF2	ESPNP	AARS2	BUB1	DLG1-AS1	RHOC	AC002351.1	SLC25A5P5	AC067863.2	EGFL7	VAT1L	A4GALT	RECQL4	ABALON	MELK	GASK1B
	AC104066.1	GABARAP	DRAM2	DSCR4	AC002076.1	FANCA	URAD	CALHM2	AC126474.2	ECT2	AC141586.1	C4orf3	PRSS36	MRPS31P4	AC099850.3	CCDC138	RRM2	AL031719.1	RAD18	AC027228.2
	CTSO	VAT1	IRAIN	SLC7A10	POM121L2	EDN3	SGO1	PECAM1	AC007128.2	AC005077.4	LINC01896	ADGRL4	CAVIN1	E2F7	URB2	CBY1	TOM1	AC093627.5	GLDC	KIF18B
	OPTN	CLEC14A	SYT13	FOLR2	SUPT16H	SCRIB	OTOR	EME1	ATAD5	AC005336.3	MDN1	CBARP	PRDM10	ESAM	UBXN7	CDC45	DHX57	C5AR2	AC104779.1	GMFG
	ZNF670-ZNF695	FOXA2	DLL3	AL590226.1	FSTL5	IL3RA	ARPC5	FASN	RAD51AP1	AL008723.2	RADX	MFNG	MT-RNR2	CHD8	OSTF1	GGTA1P	AC090673.1	ISCA2P1	INA	HEBP1
	TBC1D31	KIF2A	KIF14	CRAT	RCOR1	HNMT	CDCA5	AL021920.2	TDP1	TCEA1P2	NAGLU	ARL6IP6	TTPAL	TFAP2A	PRAC1	FAM167B	THOC2	MYCT1	DIPK2B	TRRAP
	SLC35G1	CREG1	RBMXP2	OTUD6B	MMRN2	AC092685.1	NOC3L	MDC1	SLC25A24P2	TMEM249	TRIB2	MTMR4	AL500527.1	HAS2-AS1	IPO8P1	TFAP4	AP000526.1	CMAHP	BCL6B	MIER3
	AL161785.1	GIMAP1	LTC4S	KLF2	KHNYN	Z68871.1	B3GALT4	LMNB1	ZNRF3	INAVA	ARHGAP1	BRWD3	SNRNP200	TRADD	NKX2-4	AC005336.2	PDE7A	PABPC3	SELENOM	INTS2
	NMRK1	ANXA11	CREBL2	ATP7B	EDC3	AP001625.1	MIR22HG	CLEC3B	PKIA-AS1	MCM4	CYP51A1	NCF4	USP42	ARMC1	MCF2L-AS1	MIS18BP1	AC131159.2	SGO2	LINC00543	RRS1
	KIFC1	RAMAC	ZNF280C	SUDS3P1	DDHD1	SORBS3	HIGD1B	CHODL	RASD1	ZC3H14	CCDC88A	UBE2B	CDCA8	ADPRH	SMR3B	TOP2A	AL121949.1	PRMT5	MMP19	SIRPA
	MIR4262	RNASEH1	ZSCAN29	AC011773.1	AL022324.2	YWHAZP4	GPR34	MIR3663	MKI67	AL121949.3	ARID5A	DEFB126	CRYGD	PAQR9	RPAP1	RAD54L2	MOS	CPNE3	PDX1	C2orf69P1
	BRI3	AC103808.3	JUND	GART	OTUD1	NCAPG	IGFBP4	MIR621	OIP5	SIM2	COPZ2	ETV4	PDCD11	ICAM2	AC078993.1	KNL1	KIF4A	TIMP2	TAF1A	STOM
	LYL1	LINC02672	MEDAG	AGGF1P1	KNTC1	PCNX4	TBX3	GOLGA6L9	ZNF714	LINC02657	ZNF445	RAD21	KCNQ1	TTK	SLIT2-IT1	FOXG1	SALL3	ASPM	CCNK	CCL14
	XKR5	AC138207.5	PEA15	CYSTM1	ZDBF2	KNSTRN	TOX	ELAVL4	RASGRP4	CETP	DSCC1	AC103808.1	AC025437.1	AC139426.3	LINC02200	HCFC1	PLEKHO2	AC099518.1	AC074117.1	VAMP8
	KIF24	CEBPZ	NENF	RAD54L	VWDE	CENPVL3	ATP6V0E1	MIR181A1	HAS2	TLX1	GNL3LP1	HOOK1	FOXO3B	INAFM1	DHRS3	CTAGE3P	PIK3IP1	XPO1	GRID2IP	AJ003147.1
	NKRF	TMEM219	LSG1	SLC8B1	KTN1-AS1	AVL9	S1PR1	ATP11B	ACADS	AC226118.1	TINAGL1	BIRC6	HSD17B14	ZNF804B	TMEM41A	AL139023.1	NCOA2	RF02132	ZNF524	PRR11
	STMN2	TRAP1	VSX2	SPRYD3	HERPUD1	KLF2P1	DUSP7	GSN	RBM25	ALOX12B	LMNB2	AC004943.1	PABPC1L2B	LY86	AC104687.2	SELENOV	AJUBA	AL109614.1	NUCB1	PCDH9
	TOB2P1	LINC02113	ZNF385A	MVP	OPA1	GTSE1	DDN-AS1	COX4I2	CLDN5	KIAA0586	ODC1	HAUS5	LINC02086	ADAMTS7P4	ADARB2	ZNF391	KCNJ5	MKNK1	MOB3C	ZNF670
	HMG20A	FANCI	CT45A3	PDIA6	RRP15	HMGN1P36	CEBPB	SAP130	PLCXD1	SHISAL2B	TPX2	SVIL2P	WDR12	CENPE	BLVRB	GIMAP8	DIAPH3	TAF1B	IL21-AS1	ZNF460
	AC090152.1	TAF2	NFXL1	NDUFC1	TNFRSF1B	POLE2	AL512604.2	COX6B1P2	U2SURP	MCIDAS	ARHGAP11A	DPY19L4	DDX12P	AC015468.3	ASAH1	WDR45BP1	EML6	ORAI3	CCDC15	SYCP2L
	COX7A1	USP28	PFDN5	WDR4	FBXO11	GLDCP1	SH3GL3	AL136987.1	CSF1	HMGB3	CRYAB	CKAP2L	CEBPD	TNXB	PROSER3	CHEK1	TBR1	NUP155	POLD1	LAMB2
	DSCR8	PRIM1	BPIFB3	CDC6	RACGAP1	BLACAT1	FMNL2	GRPR	AC007285.2	SPRY4	OR5BH1P	FBXO22	KIF20A	LINC02036	CYP4A22-AS1	RNASE6	LINC01521	AF241728.1	AL929601.4	LINC01419
	MIEN1	RNA5SP283	LRRCC1	AC098679.4	NAA60	CUL4B	PPIC	FAM177B	ERVH48-1	TMBIM4	TAPBP	ZFHX4	AC034102.6	SPC25	LINC01386	AC113191.1	IL1RAP	NUFIP1	AC006058.2	TOP1MT
	HCG18	HPGDS	TK2	ZNF507	AC004067.1	HIST1H2BL	GPX5	LINC01907	DPY19L2P4	MCRIP2P1	MTIF3	LAMTOR4	AK3P3	GPIHBP1	MKRN9P	FBXO41	AC139149.1	AL512310.11	FAR2P1	POLR3A
	TRPA1	PARP2	GPR142	WDR45	AC011700.1	DNAJC9	ANKRD46	AC130371.2	CCDC159	AC025031.2	AC008060.2	TMBIM1	CHERP	HMGA1P1	NHEJ1	EDC4	EMC3-AS1	CD14	RARRES2P2	CPOX
	AC004969.1	DPY19L2P2	DCAF1	MCM3AP-AS1	BCOR	EYS	PCDHA2	MT-CO3	NUS1P1	TAS2R2P	AL669831.1	FTH1P3	HMMR	ZNF250	DDX18	AGPAT5	SERPINB7	ADAM15	TG	RFC4
	CDAN1	AC009812.3	SMC3	DTL	TRIM50	GYPC	TRAIP	LINC00533	NAGS	HIST1H2AI	CNOT1	FAM114A1	JRK	SPRED2	WDR3	SLC6A3	FOXM1	FXR1	CLSPN	RGP1
	CARD6	ZNF438	PLVAP	DLX2	PROKR1	KRTAP21-1	AC092647.5	TWNK	RAB3B	MT-ND3	GINM1	ARL6IP5	LINC00665	KLRB1	FTL	MRTFA	SLC19A1	AC026412.3	AC004485.1	AC069499.1
	MIR5689HG	ARRB2	VGF	FBXL18	TP53TG3HP	MS4A4A	AC135731.1	NAA16	NBN	SENP1	AURKA	AC011374.2	RNF2P1	CENPK	UTP23	SLC7A6OS	PRKCI	LINC00680	LIN9	DLX2-DT
	PLXND1	RNA5SP481	PIGO	SPAG5	CHORDC1	HSD3B7	NEMF	RASIP1	OFCC1	SOSTDC1	AL772337.3	KANK3	AC093278.2	PRTG	RHOXF1P1	POM121	TECPR2	NBL1	PHC1P1	CDCA4
	PYURF	ATXN2L	TRIP13	C17orf53	LPAR3	AC005064.1	FARP2	SIPA1	CEP85	BAZ2A	YLPM1	AC069277.1	AC069277.2	SEMA3G	SPINDOC	VWF	RNF31	BRPF3	C14orf39	GLCCI1
	AMER1	PLEKHA8	SCN1B	FANCB	TNFRSF1A	CNNM1	LAMP1	CNMD	FOXI3	TOP3B	IFNGR1	SGSM3	HNRNPA3P6	RHOB	HMGN1P37	HSPD1P5	FABP3	ZFP69B	ATP6V1B1-AS1	AL390334.1
	SMIM14	DIPK1A	WNT5A-AS1	EFR3B	GGT5	WBP2	MIR3681HG	USHBP1	AC010522.1	AC138430.1	AC011298.1	MPC2	BARX1	AMDHD2	GTF2H2C	TP53TG1	ZNF146	SLC5A6	AF186192.3	E2F6
	AC133548.2	LINC02249	ZNF318	AC012123.2	CBL	PLEKHH1	MFAP5	AC090833.1	SKA3	APOLD1	SMC1A	BTG2	AC100782.1	SCUBE3	ENG	RRP1B	NPHS2	AC005052.1	CSF1R	TRPC7
	SMARCD1	AL035458.1	TAF11L14	PABPC1L2A	MYL9	COL11A2	AC104119.1	TMEM176A	FTH1P7	HMHB1	NPM1P39	CTSD	ZWINT	AL133371.2	ACKR1	ROBO4	TOPBP1	PCDHB8	SIL1	WBP11
	AC004943.2	TRIM36	AC000068.1	USP10	STX12	VAMP5	DBF4	PRDM11	NDC1	MS4A6A	TNFAIP8L2	NPS	LXN	AC104447.1	TFPI2	MGAT1	TRA2B	AC087651.1	RTEL1	PRC1
	ZNF839	TMEM59	ARID3B	NCR3LG1	BRAF	GRN	TPRG1L	FAM90A28P	SNX18P7	H2BFWT	SERPING1	NFYA	AC084064.1	CSPG4P12	RPS3AP54	C1QTNF6	RELB	USP37	TCERG1	PATZ1
	AC025419.1	UPF3B	HIST1H4C	WDCP	LINC01623	CBX2	SELENOOLP	ATP6V1E1	AL158013.1	MGST3	MAD2L1	MGME1	MKRN2	ICE1	OLA1P1	AC103808.5	ZFP41	CHD1	LINC01410	AC005332.6
	CT45A1	RILP	IGF1	PROM1	MMD2	EPAS1	F11R	LSM12P1	AC004980.2	KIF2C	OR13Z2P	ACACA	FTH1P20	AC012073.1	TMEM129	SNHG1	AC087289.1	RBM41	ANLN	TBCCD1
	AC100821.1	EIF2B5	FAM163A	TMPO	PCAT19	TET1	MT-CO1	AC138904.1	ZBTB8B	RWDD1	SETD7	RAB3IL1	ZNF726	FBXO45	SOX18	AC005865.2	LMCD1	PBX2	XKR7	GVQW3
	ANKRD18B	CEP170P1	MID1IP1-AS1	PIM3	SASS6	UBAP2	LRFN5	Z94721.1	AC008708.1	WDR13	DARS-AS1	TSNARE1	LINC01572	NOS3	LINC00189	CCDC96	ALDH9A1	COA3	PLB1	PPAT
	SNORD114-21	LINC00887	ZFAND1	GUCY1B1	UBE2D4	AL596087.1	MTHFD1	UXT	SNORA55	SINHCAFP2	PLK4	SETD2	LINC00632	ISCA1	RBM4	TPPP3	KLHL18	PMS2CL	VENTX	NOP9
	IL12A-AS1	DHFR	AC011632.1	GSTCD	PUS7	AC006329.1	PHF11	TSPAN15	IGF2BP2-AS1	TMEM176B	CST3	KIF3C	AC004816.1	AC016205.1	ZNF184	NPC2	AC023794.2	SETDB1	AC016831.3	AC120114.1
	OPRD1	SP3P	TYROBP	AL359643.3	GCC2-AS1	LINC01162	NUF2	LYPLA1	USP32	ZNF550	XYLB	MTFR1	RNU5B-4P	LINC01807	CLDN10	DCLK1	AL358473.1	MTND1P28	MED6	PFKFB4
	AC074237.1	AC011298.3	VAMP2	PDPN	LEMD1	PGRMC2	AC073343.2	GIMAP4	TCN2	SNORD70	CCNJ	ACADVL	SERPINB1	AC002070.1	ZNF496	NF1P10	TUT4	EIF3C	AC005540.1	AHCTF1
	TET3	CT45A5	AC092574.2	DUS4L	ECM2	SNHG4	HOXC13-AS	UBXN6	TMEM88	EPHX1	FBXL21P	PLUT	ABHD17AP4	LINC00311	IL12A	SELPLG	PGBD1	HCST	ZNF70	MPEG1
	ENOX1	CKS1B	RHOG	ALKBH7	TIMM8A	GPR183	CYYR1	AC110995.1	SQLE	GEN1	ATG4A	AC126323.4	FREM2	RGS10	AC090771.1	AC114811.2	PLK1	RASGRF2	TNPO1	C1QA
	AC092881.1	RNA5SP317	FAM229B	FTH1P11	POLR1A	ZNF384	GUSBP12	ANKRD11	LAMTOR2	EYA3	CZIB	ANGPTL2	DPEP2	F11-AS1	CENPQ	CD99	CEP295	DNAJC6	AK4P1	LGMN
	GTF3C3	AC015712.6	SMC2	NR2C2	MTND4P4	HSPB8	AC020891.2	CYP1B1	RAMP3	ZMYM1	RARRES2P1	PTPN18	PCDHA1	AC026412.2	FTH1	NFKBIA	FIG4	TAX1BP3	HLCS	TMEM209
	ITGA11	VKORC1	AC092651.2	AC147067.2	GNA15	HLA-E	CENPJ	AC073585.1	HMGCR	MED11	PSMC1P13	MCCC1	AP001646.2	FAM161A	GPR4	ZNF131	RUBCNL	AC018558.2	AC011095.1	CCDC77
	IL1RAPL2	TMEM147-AS1	EMSY	AC091173.1	SNORD46	ALOX5AP	PTCD3	PHC1	DKC1	IMPA1	NUP153	ATP6V1G1	ZFP64	MACORIS	NUP98	BRCA1	LINC02438	HNRNPA1P10	LINC02048	RNU6-529P
	LGALS9	AC090099.2	AC004221.1	YTHDF3	SF3B5	PCLAF	CHAF1A	ARHGEF10L	DCUN1D3	MKLN1	FMNL1	CAPN11	POU4F1	ZBTB7B	ZNF202	BTAF1	ZNF74	ARL8A	AC004596.1	ADAP2
	AFF2	ERMP1	LYPD8	CDH5	DHX16	ARPC3	ARHGAP39	ZKSCAN3	CCM2L	EEF1AKMT1	UBE3D	JTB	TMEM30B	TFRC	AMZ2P1	AC009533.2	HOXC13	HCLS1	COMMD9	AC103808.6
	CLEC4GP1	SLCO3A1	TNFRSF14	AL157373.2	GET4	NME3	RBM12	AC010168.1	AC138409.2	AL445187.1	NBAT1	ANKRD20A1	TMEM145	CDCA2	UBL7-AS1	KDM5C	HOXD13	ZWILCH	LILRB5	MRPL54
	TMEM97	TUBGCP4	MAGEA5	HBA2	AC121334.2	LINC01001	C3	ZNF358	HPDL	AC084262.1	SLC25A37	PRDM15	NOTCH4	BANF1P2	PODN	AC040977.1	NEK2	LINC02611	CTSZ	KCNV2
	GRAMD1B	PNPLA2	APBB1IP	SARAF	AL360181.1	UBE2V1	ZFAND5	HAUS2	LINC00613	AC129492.2	BCL11A	KCNMB2-AS1	AC091057.1	PTBP1P	IRX2	AC008738.4	LRRC57	BPTF	SLAIN1	SURF1
	LIG1	SIN3A	CDC5L	ITPRID2	C11orf42	FBN2	TXNIP	TAF5	AC144831.1	IFI27L2	PCDHA6	AC007938.2	TCP10L2	HNRNPLL	C5AR1	MESTP1	CDK13	GTF2IP7	ZNF107	AL357054.3
	CCDC28A	IDI2-AS1	SAPCD2	PIP5K1A	CYTH4	OTX2	ZNF138	ZBED4	NDST3	AC008759.3	ZNF705CP	CNOT10	CR786580.1	AC007998.3	LRP2	RF00003	EFCAB10	PSMC1	HNRNPH1	GTF2IP3
	AL136295.5	FAM19A4	AC120042.1	RNF182	AP003784.1	TCF12	SLC22A18AS	AL137803.1	AC087481.2	POM121C	ENPEP	ZC3H8	AIF1	UCHL5	BEND4	NOLC1	TOP1	NIN	ZNF335	AC092422.1
	AL391834.2	F2RL1	CCDC152	HBB	ZNF23	ZMYM3	CADPS	E2F8	TCOF1	GPX6	TP53TG3	SMC6	GPATCH8	CENPN	AL845311.1	CASP10	INTS4	SLC38A9	NPM1P27	PRR16
	PRPF3	MT-CYB	CDC25C	SNORA71B	DBF4B	MS4A7	LRRC37A15P	BUB3	POTEF	AC243428.1	AC087241.3	KRT8P46	GUSBP2	AC245033.3	SLC25A28	CFD	AC027243.2	ACSL5	AC092115.1	AL021068.1
	LINC01719	MCM2	TMEM63C	AC016831.1	TUFMP1	DDX27	ITM2B	GNL3L	GTF2I	HNRNPA3P5	AC116609.1	OTUB2	HERC2P8	PLCXD2	GASK1A	LIMS2	GUSBP3	AC103681.2	RNF39	P2RX4
	PARGP1	PKMYT1	SNX3	AL583785.1	ESCO2	ITGAM	CASKIN1	GPX4	AL132709.1	UCKL1-AS1	MT-ATP6	PSMB10	CD34	MED12	ZSCAN2	C18orf54	LIN28B-AS1	PLEKHF1	PLA2G4C	AC016708.1
	ALX1	AC098859.1	ZNF621	C1orf109	RN7SL668P	RPL34	NPR1	BRIP1	DUSP9	IL33	GDNF	ZNF688	MPP1	AL391358.1	PLPPR3	FOXP4	EDDM3CP	ANKRD36B	F2RL3	METRNL
	LTN1	VDAC1P6	POTEE	HSF2BP	NDUFA2	IGF1R	CNPY1	CD4	KIAA1549L	RINT1	WRNIP1	SLC14A1	VRK2	ARHGDIB	MEX3A	TARDBPP2	DHX9	C3orf86	SOCS7	KCNJ12
	DEPDC1	GLIPR2	AC009720.1	SLF1	SOWAHB	SLC16A9	MT-TP	AL121955.1	NPPC	LINC01756	ZGRF1	AC103808.2	AC104083.1	LINC02575	PLEKHM3	RAB4B	EXOC3L1	URM1	AC003072.1	ATP1A3
	LINC01981	TPTE	AC136944.4	ANKRD61	AC027243.1	PQLC1	JOSD2	C16orf87	IPO7	FBXL5	GOLGA6L10	BEST4	DNMT1	PROKR2	HIST1H2AH	NAGK	ZW10	LEUTX	RHPN2	AC073415.1
	HNRNPCP2	SOX11	SRGN	MTA1	SLCO2B1	CLTB	IL4R	THAP12P7	AF121898.1	RILPL2	THBD	AC018616.1	KIF21B	GON4L	LINC02188	RBP7	GJC3	AL391152.1	RPSAP7	DSCR4-IT1
	SLC35F6	AC004678.1	SPARC	HLA-DMA	YEATS2-AS1	ZNF487	MXD4	STX4	TRMT6	MIR125B1	CDK1	CTSA	ATG16L1	EPOP	ZNF730	MYL6	LINC00491	MCM3	PEPD	SPI1
	AC090099.4	FOXP4-AS1	MICOS13	AGO3	TMEM127	NUSAP1	AC138625.1	HOXB1	OR1F2P	RAB7A	AC233992.3	ZNF699	TTI1	AC009139.1	CEP76	PPP3CC	SELENOW	DCDC2	USP24	RN7SL523P
	TBXAS1	TBC1D17	ZKSCAN2	HIF1AN	LINC00682	LINC02189	MKRN3	SAMD15	AC107021.1	PPHLN1	UBAP2L	CCDC80	DNAJC11	AC079949.1	GNAI2	SRFBP1	CSMD3	AP001469.2	PYCARD	LARP1
	ZNF736	GFM1	HMGN1P28	CCAR1	ZNF143	ZNHIT1	KAAG1	MIR3651	SCARF1	MAGEB17	ACSL1	AC008761.3	AC018755.4	UGT3A2	RNF214	ARSA	STARD4	AC022540.1	NSD2	RAB7B
	SCN8A	AL034397.3	ZNF251	BORCS6	CEP170	TPBG	ZNF805	TUBBP6	MT-CO2	AL136307.1	PNPT1	SP8	FGF7	COQ10B	PMAIP1	SYK	CNDP1	G2E3-AS1	NDUFA3	TSPAN6
	STX8	TRIOBP	ACTB	KLF14	AC004987.2	LDLRAD3	AC105219.4	ATAD2B	SOX21-AS1	AC100823.2	PNKD	TMEM255B	PPIAP91	LINC02315	LINC02495	ZKSCAN8	AC010834.3	HSPD1P1	AC093249.2	PPP4R3A
	USP19	S100A12	AC245517.2	BBC3	NBPF5P	TTF2	ANXA5	TAC1	RLBP1	OR6F1	RIF1	SLC27A1	GAL3ST4	MRPS28	L2HGDH	AC099499.1	AL121821.1	TRMT61B	NIP7	STAU2
	SERF2	PLA2G2A	THAP10	AC106774.2	FTH1P8	MIR3125	ZNF81	DPF2	SNORD11B	USP34	MIR548AN	AC244102.1	ZBTB10	USH1C	GLS2	GRP	TYRO3	CEP250	SH3BGRL	FNDC8
	SCN5A	PTMAP9	AC108025.2	PHF20L1	GSDMA	FILIP1	MT-ND4	TXNDC15	ARRDC2	KDM3A	ZNF770	EIF4EBP1P1	LINC00518	AC002116.2	GIMAP7	SOCS2P2	AADAT	UTP4	KAT7	DPY19L2P1
	AL109615.2	AC009487.3	PASK	AC012313.2	GFM2	FASTK	SPARCL1	CABLES2	AC135507.1	COL2A1	SLC17A6	TP53BP1	STK39	FTH1P2	AC012512.1	MT-RNR1	RRAS	MYL12B	COPS5	CSTF3
	TSPAN5	EZH2	AC007326.1	SH2D3C	SEC61B	SLC43A2	WRN	HIC2	IGLON5	RP1	AL391095.3	AF241725.1	SLC15A3	AP002906.1	B3GNT8	UGT1A12P	BORA	MYL12A	TUBBP1	FUCA1
	SLC8A3	DDTP1	AC090023.1	AL159169.1	CNOT3	AC090023.2	TBX5	SNORA71A	F11	TMEM175	ERBB4	AC009533.1	AP001136.1	PROSER1	RNU6-705P	MCUB	EDF1	LINC02059	DUX4L46	KRTAP8-2P
	DHFRP1	NBPF13P	AC073476.3	FOXO1	PPP2CB	HOMER3-AS1	NGLY1	ZNF7	RNF24	MARS	ZNF316	TROAP	RLF	LINC02428	FOXA3	RNU6-62P	C3AR1	CRYBA2	AC021915.2	AP000786.1
	UNC79	AC091814.1	AC064807.1	PFAS	SH3D21	LAIR1	CAPZB	AC079601.1	ZNF707	EDARADD	GLMP	AKR1C3	AL732414.1	AC021087.3	ZNF560	CD55	FBXL6	AP001626.1	NELL2	SOD2
	SESN1	ZNF619	KIAA1549	MNAT1	TEDC2	HASPIN	PALMD	ATG13	RPS27L	TSPAN18	AC074135.1	AC004852.2	GPT2	AC124283.2	AC079601.2	TST	RPL7L1P8	RAB32	RNU6-140P	USP13
	RN7SL138P	AGBL5	NEK2P2	IL15RA	AC022150.4	VN1R81P	HIST3H2BA	AC069431.1	AC092783.1	FCER1G	SENP5	TRAF3IP2	LRRC40	TANGO2	LINC02404	CICP16	PNN	TOMM20P4	CCRL2	IL2RA
	STK35	MAGEB2	AC009132.1	ZBTB39	TBC1D10A	PSMC3IP	IQCF1	EVI2A	CA8	KLRC4	COPG2	BARX1-DT	STRBP	WDR35	UQCR11	EMILIN3	HPS1	MATN3	SNORD116-30	AC008937.1
	SLITRK1	NKX2-1-AS1	CDKN1A	AC112721.2	FBN3	AC025181.2	TNKS1BP1	MAP3K9	CDC20	ZNF587	AL117329.1	SLC38A10	LINC01748	RNU6-505P	RBM47	RECQL	AC138207.4	BMS1	CD209	EARS2
	COMMD6	IGIP	MESTP3	AC096637.1	TFB2M	EN2	EIF4G1	AC091076.1	AC011298.2	APOL1	SP4	RN7SL381P	LINC01893	RNASEH1P1	ZCCHC3	LRRC32	ARHGAP27	PDCL2P2	C11orf96	CKAP5
	ZNF239	NFKB1	NTSR1	AC243562.3	CRAMP1	AC025881.1	TRIM71	AL928654.1	VSIG4	AC009318.2	RAB20	ITPR3	LINC00973	AC109439.2	TPP1	PNPLA3	CKAP2	AC108673.1	GADD45B	PHETA2
	KHDC4	PRRC2B	C1orf162	RPL7L1P11	LST1	CENPA	UBE2T	CYB5R3	PRRC2A	CEP55	MT-ND6	IQGAP3	RRAGA	AL590609.2	ECM1	AC246817.2	PLPP1	OAZ1	STON2	UBE2O
	AC104793.1	F13A1	CAMSAP3	MCTS2P	RANBP2	PRR18	SEC24C	KLHL1	CEP192	AC021242.3	SLC30A6	DNAH8	TAF4	ITGA10	ZNF492	RNA5SP338	DYNLT1	NUP93	CCNB2	CREBZF
	SDF2	GNPTG	BLOC1S1	LAMTOR3	LAPTM5	AC018541.1	KLHL7	DAZAP2	PHF2P2	TM4SF18	C17orf49	EXOC5	RPL13AP25	TCF24	CYTL1	CUTC	FTH1P16	ZC3H18	HMGN1P38	ANKRD36C
	ORMDL3	LINC01467	AC073257.2	BX322234.1	DRAM1	ASXL1	SLC35E1P1	NIPA1	CYB5D2	KRT10	IFI35	MAGEB3	HIST1H2APS5	AP000487.1	CU104787.1	COL13A1	WSB2	C4BPAP1	AL118511.1	ASPA
	PPRC1	MRC1	FBXO43	TMEM91	PABPC1P1	CCDC142	SLC35F2	HIVEP3	AP005233.2	RNF135	AC016723.1	GPATCH1	PDCD2L	ESRRG	UGT3A1	AC026369.2	CYBRD1	AC025884.2	DHRS7B	PRR14
	SSC5D	NARS2	NOL10	GABRG3	PROX1-AS1	BNIP3P17	SPATA31C2	SKOR2	LINC01235	AC103778.1	LCOR	STAG1	FAN1	VPS13B	AC079062.1	AC018735.1	AC010618.1	ASXL2	AC011453.1	WDR62
	CHTF18	XPA	ATP6AP2	AC109635.3	ZNF749	AC008050.1	ZC3H13	AC104964.3	AC122714.2	AL445209.1	DNAJA1P3	AC122688.4	TOP2B	LRRC25	MINPP1	SIGLEC1	CXCL12	SNORD67	RPL23AP77	FAM214B
	DNAAF5	CD74	AL445471.1	DDO	PEBP1	SMG1	AC011503.1	ASAP2	ZNF713	PALM	Z82186.1	GTF3C6	AC103808.4	AOC3	DOK2	AC012313.4	GRM7-AS3	AC129492.1	RNU6-431P	TRIM8
[truncated: 750 more rows]
