# Supplementary material for: m6A regulator-mediated methylation modification patterns and tumor immune microenvironment in sarcoma
Source: Aging (Albany NY). 2022 Jan 3;14(1):330–53. doi: 10.18632/aging.203807 (PMC8791212; doi:10.18632/aging.203807)
Supplement: Supplementary Table 7 [file aging-14-203807-s005.xlsx]

## Sheet: Sheet1
Supplementary Table 7. m6A score groups of patients with sarcoma.
id	futime(years)	fustat	m6Ascore	group
TCGA-3B-A9HI-01A	4.16712	0	0.117363	Low
TCGA-3B-A9HJ-01A	3.02466	0	0.252995	Low
TCGA-3B-A9HL-01A	1.6411	1	-0.0997111	Low
TCGA-3B-A9HO-01A	2.6274	0	0.147447	Low
TCGA-3B-A9HP-01A	4.45753	1	-2.56575	Low
TCGA-3B-A9HQ-01A	5.71233	0	-3.96687	Low
TCGA-3B-A9HR-01A	7.38082	1	-6.131	Low
TCGA-3B-A9HS-01A	3.74247	1	1.56811	Low
TCGA-3B-A9HT-01A	4.56164	0	1.66929	Low
TCGA-3B-A9HU-01A	2.10411	0	-2.75542	Low
TCGA-3B-A9HV-01A	1.19726	1	-3.88462	Low
TCGA-3B-A9HX-01A	3.56986	0	0.462626	Low
TCGA-3B-A9HY-01A	0.860274	0	-4.30148	Low
TCGA-3B-A9HZ-01A	3.20548	0	-3.27352	Low
TCGA-3B-A9I0-01A	3.00274	0	-4.35966	Low
TCGA-3B-A9I1-01A	1.55342	1	-4.57942	Low
TCGA-3B-A9I3-01A	2.2137	0	-1.52411	Low
TCGA-3R-A8YX-01A	0.0465753	1	7.82675	High
TCGA-DX-A1KU-01A	1.16986	1	1.26087	Low
TCGA-DX-A1KW-01A	2.72603	1	0.778378	Low
TCGA-DX-A1KX-01A	5.71781	0	0.165534	Low
TCGA-DX-A1KY-01A	1.07123	1	-0.046793	Low
TCGA-DX-A1KZ-01A	3.7589	0	0.0619749	Low
TCGA-DX-A1L0-01A	1.54521	1	-2.38275	Low
TCGA-DX-A1L1-01A	4.51781	1	0.46927	Low
TCGA-DX-A1L2-01A	7.08493	0	-3.66357	Low
TCGA-DX-A1L3-01A	2.79452	1	1.24501	Low
TCGA-DX-A1L4-01A	5.57808	0	1.65853	Low
TCGA-DX-A23R-01A	6.22192	0	1.84727	Low
TCGA-DX-A23T-01A	0.438356	1	1.26728	Low
TCGA-DX-A23U-01A	6.36712	1	4.46569	High
TCGA-DX-A23V-01A	5.5726	1	-1.6766	Low
TCGA-DX-A23Y-01A	0.523288	1	1.03519	Low
TCGA-DX-A23Z-01A	2.31781	1	-0.985391	Low
TCGA-DX-A240-01A	5.02466	0	3.89935	High
TCGA-DX-A2IZ-01A	0.715068	0	2.36964	Low
TCGA-DX-A2J0-01A	0.808219	1	-1.27984	Low
TCGA-DX-A2J1-01A	7.94795	0	2.09649	Low
TCGA-DX-A2J4-01A	6.59726	0	0.679438	Low
TCGA-DX-A3LS-01A	0.753425	1	2.35526	Low
TCGA-DX-A3LT-01A	4.08767	0	3.38928	High
TCGA-DX-A3LU-01A	7.23562	0	-0.0388272	Low
TCGA-DX-A3LW-01A	11.3699	0	-0.437982	Low
TCGA-DX-A3LY-01B	2.7863	0	-0.176341	Low
TCGA-DX-A3M1-01A	3.72329	0	0.13618	Low
TCGA-DX-A3M2-01A	2.89041	0	2.55782	Low
TCGA-DX-A3U5-01A	2.65479	0	-1.2937	Low
TCGA-DX-A3U6-01A	2.98082	1	1.09687	Low
TCGA-DX-A3U7-01A	4.25205	1	-3.81139	Low
TCGA-DX-A3U8-01A	0.378082	1	2.82185	High
TCGA-DX-A3U9-01A	1.24932	1	-4.1714	Low
TCGA-DX-A3UA-01A	0.890411	1	2.98099	High
TCGA-DX-A3UB-01A	6.15616	0	-1.94906	Low
TCGA-DX-A3UC-01A	5.71233	0	-4.32319	Low
TCGA-DX-A3UD-01A	4.20274	0	-3.97781	Low
TCGA-DX-A3UE-01A	2.90685	1	-5.26407	Low
TCGA-DX-A3UF-01A	7.12055	1	-3.47648	Low
TCGA-DX-A48J-01A	0.810959	1	-5.30094	Low
TCGA-DX-A48K-01A	3.83288	0	1.47471	Low
TCGA-DX-A48L-01A	2.02192	1	-4.48113	Low
TCGA-DX-A48N-01A	2.93973	0	-2.20317	Low
TCGA-DX-A48O-01A	4.39726	0	-6.01995	Low
TCGA-DX-A48P-01A	3.83562	0	-4.52866	Low
TCGA-DX-A48R-01A	2.20548	0	-5.43581	Low
TCGA-DX-A48U-01A	9.06849	0	-7.2932	Low
TCGA-DX-A6B7-01A	3.13151	0	-6.00701	Low
TCGA-DX-A6B8-01A	1.32877	1	4.27204	High
TCGA-DX-A6B9-01A	3.11781	0	-3.97275	Low
TCGA-DX-A6BA-01A	6.89041	0	-4.61086	Low
TCGA-DX-A6BB-01A	3.0274	0	-4.36855	Low
TCGA-DX-A6BE-01A	2.4137	0	0.87222	Low
TCGA-DX-A6BF-01A	2.66301	0	0.154358	Low
TCGA-DX-A6BG-01A	3.07123	0	2.59795	Low
TCGA-DX-A6BH-01A	2.24932	0	0.188096	Low
TCGA-DX-A6YQ-01A	0.254795	1	4.82247	High
TCGA-DX-A6YR-01A	3.41644	0	1.0124	Low
TCGA-DX-A6YS-01A	6.52329	0	-2.23801	Low
TCGA-DX-A6YT-01A	5.6	0	0.0137281	Low
TCGA-DX-A6YU-01A	2.86301	0	-1.04334	Low
TCGA-DX-A6YV-01A	4.20822	1	-0.232833	Low
TCGA-DX-A6YX-01A	1.40548	1	6.0593	High
TCGA-DX-A6YZ-01A	7.19178	0	-0.877049	Low
TCGA-DX-A6Z0-01A	5.35068	1	-0.870366	Low
TCGA-DX-A6Z2-01A	7.75342	0	-4.13589	Low
TCGA-DX-A7EF-01A	1.56164	1	6.84136	High
TCGA-DX-A7EI-01A	2.87397	1	2.74735	High
TCGA-DX-A7EL-01A	6.27671	0	-3.39685	Low
TCGA-DX-A7EM-01A	5.18356	0	-4.03011	Low
TCGA-DX-A7EN-01A	2.52877	0	-4.22932	Low
TCGA-DX-A7EO-01A	12.6767	0	3.2437	High
TCGA-DX-A7EQ-01A	2.45753	1	3.12201	High
TCGA-DX-A7ER-01A	4.01644	1	3.33162	High
TCGA-DX-A7ES-01A	1.67123	0	-1.04293	Low
TCGA-DX-A7ET-01A	1.26849	0	2.58628	Low
TCGA-DX-A7EU-01A	1.97534	0	-0.762421	Low
TCGA-DX-A8BG-01A	1.49589	0	0.131177	Low
TCGA-DX-A8BH-01A	1.20274	1	6.36607	High
TCGA-DX-A8BJ-01A	0.778082	1	5.27792	High
TCGA-DX-A8BK-01A	5.16438	0	1.22192	Low
TCGA-DX-A8BL-01A	3.76164	0	-1.28482	Low
TCGA-DX-A8BM-01A	3.98904	0	-1.32584	Low
TCGA-DX-A8BN-01A	3.18082	0	-0.345749	Low
TCGA-DX-A8BO-01A	3.39726	0	1.38973	Low
TCGA-DX-A8BP-01A	1.1726	0	4.56897	High
TCGA-DX-A8BQ-01A	4.32603	0	4.22746	High
TCGA-DX-A8BR-01A	12.5288	0	-0.883592	Low
TCGA-DX-A8BS-01A	2.32877	1	3.64652	High
TCGA-DX-A8BT-01A	3.36986	0	0.675366	Low
TCGA-DX-A8BU-01A	3.05753	1	1.57275	Low
TCGA-DX-A8BV-01A	5.05479	1	-1.56084	Low
TCGA-DX-A8BX-01A	1.61918	1	0.208698	Low
TCGA-DX-A8BZ-01A	0.547945	1	3.68153	High
TCGA-DX-AATS-01A	0.0958904	1	3.23138	High
TCGA-DX-AB2E-01A	1.48219	0	8.46175	High
TCGA-DX-AB2F-01A	1	0	-1.81815	Low
TCGA-DX-AB2G-01A	1.30959	0	-0.299777	Low
TCGA-DX-AB2H-01A	1.32055	0	2.44366	Low
TCGA-DX-AB2J-01A	3.38356	1	0.812492	Low
TCGA-DX-AB2L-01A	5.49863	0	-0.0910009	Low
TCGA-DX-AB2O-01A	7.17534	0	0.0653035	Low
TCGA-DX-AB2P-01A	1.00548	1	3.006	High
TCGA-DX-AB2Q-01A	5.56164	0	6.77237	High
TCGA-DX-AB2S-01A	0.767123	0	0.805995	Low
TCGA-DX-AB2T-01A	6.49041	0	-0.179273	Low
TCGA-DX-AB2V-01A	8.64658	0	-0.619621	Low
TCGA-DX-AB2W-01A	8.87123	0	5.2876	High
TCGA-DX-AB2X-01A	1.10685	1	7.65773	High
TCGA-DX-AB2Z-01A	2.99178	0	4.45559	High
TCGA-DX-AB30-01A	1.90411	1	2.70104	High
TCGA-DX-AB32-01A	8.49863	0	-0.0265192	Low
TCGA-DX-AB35-01A	2.54247	0	-1.7375	Low
TCGA-DX-AB36-01A	3.2	1	3.50107	High
TCGA-DX-AB37-01A	7.05479	1	0.300318	Low
TCGA-DX-AB3A-01A	2.67945	1	-0.0406355	Low
TCGA-DX-AB3B-01A	4.2411	0	0.199557	Low
TCGA-DX-AB3C-01A	5.94247	0	1.45267	Low
TCGA-FX-A2QS-01A	4.09589	0	0.550606	Low
TCGA-FX-A3NJ-01A	2.59452	0	-6.81102	Low
TCGA-FX-A3NK-01A	1.38356	0	-0.996405	Low
TCGA-FX-A3RE-01A	1.80822	0	-2.27584	Low
TCGA-FX-A3TO-01A	1.69315	0	0.437601	Low
TCGA-FX-A48G-01A	1.65753	1	-1.85166	Low
TCGA-FX-A76Y-01A	1.29041	0	-4.942	Low
TCGA-FX-A8OO-01A	0.671233	1	2.0271	Low
TCGA-HB-A2OT-01A	5.63562	0	4.58142	High
TCGA-HB-A3L4-01A	2.90685	1	-2.50526	Low
TCGA-HB-A3YV-01A	0.380822	1	-1.88607	Low
TCGA-HB-A43Z-01A	3.08493	0	-3.4128	Low
TCGA-HB-A5W3-01A	1.05205	1	-4.94557	Low
TCGA-HS-A5N7-01A	2.77534	0	-2.63525	Low
TCGA-HS-A5N8-01A	0.060274	1	2.63865	High
TCGA-HS-A5N9-01A	4.34247	0	-3.073	Low
TCGA-HS-A5NA-01A	0.816438	0	-3.75922	Low
TCGA-IE-A3OV-01A	6.70685	1	-5.73379	Low
TCGA-IE-A4EH-01A	2.24384	0	-3.62894	Low
TCGA-IE-A4EI-01A	1.6274	0	-4.68804	Low
TCGA-IE-A4EJ-01A	0.268493	0	-0.415015	Low
TCGA-IE-A4EK-01A	0.115068	0	-6.52514	Low
TCGA-IE-A6BZ-01A	1.65753	0	0.496111	Low
TCGA-IF-A3RQ-01A	3.09315	1	-1.51382	Low
TCGA-IF-A4AJ-01A	2.10137	1	-2.66147	Low
TCGA-IF-A4AK-01A	4.35616	0	-4.43503	Low
TCGA-IS-A3K6-01A	2.35068	1	-2.43976	Low
TCGA-IS-A3K7-01A	14.2575	0	4.27293	High
TCGA-IS-A3K8-01A	13.274	0	-1.59477	Low
TCGA-IS-A3KA-01A	1.13151	1	-0.546164	Low
TCGA-IW-A3M4-01A	7.16438	0	-3.938	Low
TCGA-IW-A3M5-01A	0.493151	1	4.00107	High
TCGA-IW-A3M6-01A	1.88493	0	-1.42896	Low
TCGA-JV-A5VE-01A	1.36712	0	-2.19297	Low
TCGA-JV-A5VF-01A	0.0876712	1	5.44333	High
TCGA-JV-A75J-01A	0.326027	1	4.21573	High
TCGA-K1-A3PN-01A	8.43836	0	-4.56385	Low
TCGA-K1-A3PN-02A	8.43836	0	-3.7785	Low
TCGA-K1-A3PO-01A	4.44384	0	-0.323368	Low
TCGA-K1-A3PO-11A	4.44384	0	-4.92724	Low
TCGA-K1-A42W-01A	5.18082	0	-3.56561	Low
TCGA-K1-A42X-01A	10.3151	0	-4.16764	Low
TCGA-K1-A42X-02A	10.3151	0	-4.80029	Low
TCGA-K1-A6RT-01A	1.44658	0	-1.32271	Low
TCGA-K1-A6RU-01A	1.94795	1	-0.41628	Low
TCGA-K1-A6RV-01A	0.432877	0	4.66811	High
TCGA-KD-A5QS-01A	5.31781	1	-1.36414	Low
TCGA-KD-A5QT-01A	1.36712	0	-3.80467	Low
TCGA-KD-A5QU-01A	2.93973	1	-4.50895	Low
TCGA-KF-A41W-01A	0.975342	0	3.07241	High
TCGA-LI-A67I-01A	2.52603	0	0.824163	Low
TCGA-LI-A9QH-01A	1.47945	1	-2.02008	Low
TCGA-MB-A5Y8-01A	2.11781	0	5.49071	High
TCGA-MB-A5YA-01A	0.0410959	0	-4.49293	Low
TCGA-MB-A8JK-01A	1.81096	0	-0.998978	Low
TCGA-MB-A8JL-01A	1.64384	0	1.14905	Low
TCGA-MJ-A68H-01A	1.24932	0	-2.94569	Low
TCGA-MJ-A68J-01A	1.49863	0	0.0520467	Low
TCGA-MJ-A850-01A	1.86575	0	3.5186	High
TCGA-MO-A47P-01A	0.964384	0	-3.60421	Low
TCGA-MO-A47R-01A	0.871233	1	0.3583	Low
TCGA-N1-A6IA-01A	0.613699	1	1.70384	Low
TCGA-PC-A5DK-01A	10.2466	0	-4.47207	Low
TCGA-PC-A5DL-01A	3.12877	1	-5.5648	Low
TCGA-PC-A5DM-01A	0.528767	1	5.26416	High
TCGA-PC-A5DN-01A	3.21918	1	3.17799	High
TCGA-PC-A5DO-01A	6.75068	1	-4.61849	Low
TCGA-PC-A5DP-01A	1.50685	1	-4.87108	Low
TCGA-PT-A8TR-01A	2.2274	0	-1.9064	Low
TCGA-QC-A6FX-01A	1.74521	0	2.06022	Low
TCGA-QC-A7B5-01A	1.09041	0	4.84742	High
TCGA-QC-AA9N-01A	1.47123	0	1.61924	Low
TCGA-QQ-A5V2-01A	0.153425	0	5.17991	High
TCGA-QQ-A5V9-01A	3.90137	1	1.42657	Low
TCGA-QQ-A5VA-01A	1.50685	1	1.31492	Low
TCGA-QQ-A5VB-01A	4.04932	1	4.54645	High
TCGA-QQ-A5VC-01A	2.99178	0	8.24188	High
TCGA-QQ-A5VD-01A	3.09315	0	-1.46744	Low
TCGA-QQ-A8VB-01A	15.6795	0	0.990792	Low
TCGA-QQ-A8VD-01A	10.8603	0	0.74935	Low
TCGA-QQ-A8VF-01A	9.33151	0	3.04406	High
TCGA-QQ-A8VG-01A	5.39726	1	2.81751	High
TCGA-QQ-A8VH-01A	0.876712	1	3.37196	High
TCGA-RN-A68Q-01A	0.060274	0	2.74792	High
TCGA-RN-AAAQ-01A	1.39726	0	3.31216	High
TCGA-SG-A6Z4-01A	1.57808	0	1.94715	Low
TCGA-SG-A6Z7-01A	0.323288	1	4.75607	High
TCGA-SG-A849-01A	1.46027	0	5.22923	High
TCGA-SI-A71O-01A	1.90137	1	0.0717459	Low
TCGA-SI-A71P-01A	2.11233	0	1.26885	Low
TCGA-SI-A71Q-01A	2.72877	0	3.63878	High
TCGA-SI-AA8B-01A	0.717808	1	2.7093	High
TCGA-SI-AA8C-01A	1.63562	0	1.99334	Low
TCGA-UE-A6QT-01A	1.10137	0	-1.95394	Low
TCGA-VT-A80G-01A	0.893151	0	4.14081	High
TCGA-VT-A80J-01A	2.18082	0	4.24227	High
TCGA-VT-AB3D-01A	1.03836	0	0.285375	Low
TCGA-WK-A8XO-01A	0.994521	1	4.89157	High
TCGA-WK-A8XQ-01A	0.4	1	2.47092	Low
TCGA-WK-A8XS-01A	7.06575	0	-4.80236	Low
TCGA-WK-A8XT-01A	3.45753	1	2.73684	High
TCGA-WK-A8XX-01A	3.18904	1	-3.49754	Low
TCGA-WK-A8XY-01A	5.45479	1	-5.88032	Low
TCGA-WK-A8XZ-01A	4.71781	1	-5.23134	Low
TCGA-WK-A8Y0-01A	1.88493	1	3.35086	High
TCGA-WP-A9GB-01A	0.715068	1	-2.45566	Low
TCGA-X2-A95T-01A	5.27945	0	-3.88348	Low
TCGA-X6-A7W8-01A	0.0657534	1	4.48094	High
TCGA-X6-A7WB-01A	1.50685	1	-4.00619	Low
TCGA-X6-A7WC-01A	3.77808	0	3.14264	High
TCGA-X6-A7WD-01A	2.56986	0	-2.05279	Low
TCGA-X6-A8C2-01A	2.93151	0	2.46148	Low
TCGA-X6-A8C3-01A	1.59726	0	3.12568	High
TCGA-X6-A8C4-01A	1.72055	1	8.13156	High
TCGA-X6-A8C5-01A	4.23836	0	-3.90866	Low
TCGA-X6-A8C6-01A	2.92329	1	1.097	Low
TCGA-X6-A8C7-01A	2.45479	0	2.3522	Low
TCGA-X9-A971-01A	2.27671	0	-3.13871	Low
TCGA-X9-A973-01A	3.03562	0	1.58668	Low
TCGA-Z4-A8JB-01A	0.364384	0	1.26336	Low
TCGA-Z4-A9VC-01A	1.11507	0	0.112926	Low
TCGA-Z4-AAPF-01A	1.32877	0	0.56914	Low
TCGA-Z4-AAPG-01A	1.33151	0	5.42767	High
